# Supplementary material
Source: PubMed Central journal article supplement (PMC4874786)
Supplement: NIHMS785914-supplement-SI.pdf [file NIHMS785914-supplement-SI.pdf]

## Supplemental Information

### Highly stereoselective, Intermolecular Haloetherification and Haloesterification of Allyl Amides.

Bardia Soltanzadeh, Arvind Jaganathan, Richard J. Staples and Babak Borhan\*

Department of Chemistry, Michigan State University, East Lansing, MI 48824

[babak@chemistry.msu.edu](mailto:babak@chemistry.msu.edu)

#### Table of Contents:

|                                                                                                                                                              |    |
|--------------------------------------------------------------------------------------------------------------------------------------------------------------|----|
| I. General information .....                                                                                                                                 | 2  |
| II. General procedures .....                                                                                                                                 | 2  |
| IIA. General procedure for optimization of catalytic asymmetric intermolecular haloetherification/haloesterification of unsaturated amides.....              | 2  |
| IIB. General procedure for substrate scope analysis for catalytic asymmetric intermolecular haloetherification/haloesterification of unsaturated amides..... | 3  |
| IIC. Procedure for gram scale catalytic asymmetric intermolecular haloetherification/haloesterification of unsaturated amides .....                          | 3  |
| III. Preliminary Studies.....                                                                                                                                | 4  |
| IV. Optimization of reaction variables.....                                                                                                                  | 5  |
| IV.A. Influence of the identity and stoichiometry of the chloronium source on the stereoselectivity of the reaction.....                                     | 5  |
| IV.B. Influence of reaction solvent on the enantioselectivity of the reaction.....                                                                           | 6  |
| V. Analytical data for products .....                                                                                                                        | 6  |
| V.A. Analytical data for byproduct .....                                                                                                                     | 24 |
| VI. Synthesis of unsaturated amide substrates for chlorofunctionalization .....                                                                              | 25 |
| VII. Product distribution arising due to substrate-control and catalyst-control for the intermolecular chloroetherification reaction. ....                   | 34 |
| VIIa. Analytical data for different products of chloroetherification reaction without catalyst .....                                                         | 35 |
| VIII. Absolute stereochemistry of chloroetherification products derived from <i>E</i> - alkene: ....                                                         | 38 |
| VIIIa. Analytical data for determination of chlorine face selectivity of <i>E</i> -alkene .....                                                              | 40 |
| IX. References .....                                                                                                                                         | 43 |
| X. NMR Spectra.....                                                                                                                                          | 44 |

## **I. General information**

Commercially available reagents were purchased from Sigma-Aldrich or Alfa-Aesar and used as received. CH<sub>2</sub>Cl<sub>2</sub> and acetonitrile were freshly distilled over CaH<sub>2</sub> prior to use. THF was distilled over sodium-benzophenone ketyl. All other solvents were used as purchased. <sup>1</sup>H and <sup>13</sup>C NMR were recorded on 500 MHz Varian NMR machines using CDCl<sub>3</sub> or CD<sub>3</sub>CN as solvent and were referenced to residual solvent peaks. Flash silica gel (32-63 mm, Silicycle 60 Å) was used for column chromatography. Enantiomeric excess for all products was determined by HPLC analysis using DAICEL CHIRALCEL<sup>®</sup> OJ-H and OD-H or CHIRALPAK<sup>®</sup> IA and AD-H columns. Optical rotations of all products were measured in chloroform.

## **II. General Procedures**

### **IIA. General procedure for optimization of catalytic asymmetric intermolecular haloetherification/haloesterification of unsaturated amides**

The substrate (0.04 mmol, 1.0 equiv) was suspended in acetonitrile (MeCN, 2.8 mL) in a screw-capped vial equipped with a stir bar. The resulting suspension was cooled to -30 °C in an immersion cooler. (DHQD)<sub>2</sub>PHAL (3 mg, 10 mol%), 1.2 mL of methanol or acetic acid was then introduced. After stirring for 2 min DCDMH (15 mg, 0.08 mmol, 2.0 equiv) or NBS (14.3 mg, 2.0 equiv) was added. The stirring was continued at -30 °C till the reaction was complete (TLC). The reaction was quenched by the addition of saturated aq. Na<sub>2</sub>SO<sub>3</sub> (1 mL) and diluted with DCM (3 mL). The organics were separated and the aqueous layer was extracted with DCM (3 × 3 mL). The combined organics were dried over anhydrous Na<sub>2</sub>SO<sub>4</sub>, concentrated and dissolved in CDCl<sub>3</sub> (1 mL). An equivalent amount (0.04 mmol) of MTBE was added and the solution was analyzed by NMR to obtain the NMR yield of the desired product. This solution was then concentrated in the presence of small quantity of silica gel. Column chromatography (SiO<sub>2</sub>/EtOAc – Hexanes gradient elution) gave the desired product.

Following modifications were used for halohydrin synthesis: MeCN:H<sub>2</sub>O ratio was 9:1; Reaction temperature: -10 °C.

### **IIB. General procedure for substrate scope analysis for catalytic asymmetric intermolecular haloetherification/haloesterification of unsaturated amides**

The substrate (0.1 mmol, 1.0 equiv) was suspended in acetonitrile (MeCN, 7.0 mL) in a screw-capped vial equipped with a stir bar. The resulting suspension was cooled to -30 °C in an immersion cooler. (DHQD)<sub>2</sub>PHAL (7.8 mg, 10 mol%), 3.0 mL of methanol or acetic acid was then introduced. After stirring for 2 min DCDMH (39.4 mg, 0.2 mmol, 2.0 equiv) or NBS (35.6 mg, 2.0 equiv) was added. The stirring was continued at -30 °C till the reaction was complete (TLC). The reaction was quenched by the addition of saturated aq. Na<sub>2</sub>SO<sub>3</sub> (4 mL) and diluted with DCM (3 mL). The organics were separated and the aqueous layer was extracted with DCM (3 × 3 mL). The combined organics were dried over anhyd. Na<sub>2</sub>SO<sub>4</sub> and concentrated in the presence of small quantity of silica gel. Column chromatography (SiO<sub>2</sub>/EtOAc – Hexanes gradient elution) gave the desired product.

Following modifications were used for halohydrin synthesis: MeCN:H<sub>2</sub>O ratio was 9:1; Reaction temperature: -10 °C.

### **IIC. Procedure for gram scale catalytic asymmetric intermolecular haloetherification/haloesterification of unsaturated amides**

Z-1c-NO<sub>2</sub> (1.0 g, 4.0 mmol, 1.0 equiv) was suspended in acetonitrile (MeCN, 14.0 mL) in a screw-capped vial equipped with a stir bar. The resulting suspension was cooled to -30 °C in an immersion cooler. (DHQD)<sub>2</sub>PHAL (311.6 mg, 10 mol%), 7.0 mL of methanol was then introduced. After stirring for 2 min DCDMH (1500 mg, 8.0 mmol, 2.0 equiv) was added. The stirring was continued at -30 °C till the reaction was complete (TLC). The reaction was quenched by the addition of saturated aq. Na<sub>2</sub>SO<sub>3</sub> (20 mL) and diluted with DCM (15 mL). The organics were separated and the aqueous layer was extracted with DCM (3 × 15 mL). The combined organics were dried over anhyd. Na<sub>2</sub>SO<sub>4</sub> and concentrated in the presence of silica gel. Column chromatography (SiO<sub>2</sub>/EtOAc – Hexanes gradient elution) gave the desired product.

Following modifications were used for gram scale synthesis of halohydrin *s*-2c-OH-NO<sub>2</sub>: MeCN:H<sub>2</sub>O ratio was 9:1 (20 mL); catalyst loading: 2 mol% (DHQD)<sub>2</sub>PHAL, Reaction temperature: -10 °C.

### III. Preliminary studies

In our prior work, we had demonstrated a highly diastereo- and enantioselective chlorocyclization of unsaturated amides to furnish dihydrooxazine and oxazoline heterocycles.<sup>1</sup> The use of CF<sub>3</sub>CH<sub>2</sub>OH as the reaction medium was crucial for obtaining high enantioselectivities. In the attempted chlorocyclization of *E*-**1a**-Br under optimized reaction conditions, *a*-**2a**-TFE-Br was isolated in 82:18 *er* and 35% yield (>10:1 *dr* and >10:1 *rr*) along with the desired product *t*-**3a**-Br (40%, 99.5:0.5 *er*; see Scheme S1). The reader is referred to reference 10 in the manuscript for a detailed explanation of our naming system for the starting materials and products in this manuscript. The rate of intramolecular nucleophilic capture of the putative chloriranium ion by the pendant amide nucleophile for this substrate is presumably slow enough to allow for a competing intermolecular nucleophilic capture even by the weakly nucleophilic CF<sub>3</sub>CH<sub>2</sub>OH. In the event, a simple solvent-switch from CF<sub>3</sub>CH<sub>2</sub>OH to *n*-PrNO<sub>2</sub> as the reaction medium alleviated the problem of chemodivergence, affording exclusively *t*-**3a**-Br in good yield and excellent enantioselectivity (77%, >99.5:0.5 *er*, result not shown).<sup>1</sup> While the

**Scheme S1.** Discovery of an asymmetric intermolecular chloroetherification of allyl amides

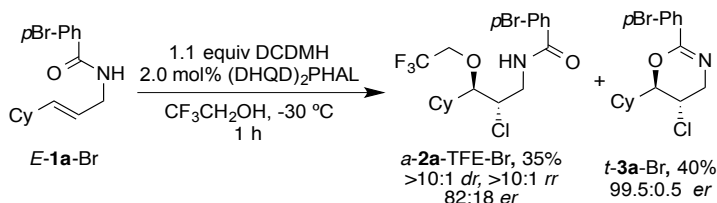

enantioselectivity and the yield of *a*-**2a**-TFE-Br were not synthetically useful, we were intrigued by the excellent diastereo- and regioselectivity of this by-product arising from the intermolecular nucleophilic capture of a sterically and electronically unbiased chloronium/chlorocarbenium ion intermediate. As such, this result represented a good starting point for developing a practical and general intermolecular chlorofunctionalization reaction of alkenes.

## IV. Optimization of reaction variables

### IV.A. Influence of the identity and stoichiometry of the chlorenium source on the stereoselectivity of the reaction.

**Table S1:** Chlorenium Source Optimization

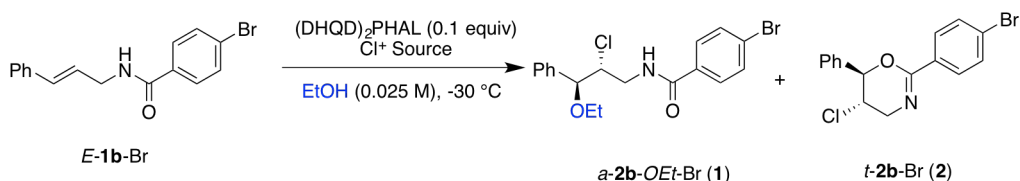

| Entry    | Source       | equiv of Cl <sup>+</sup> | Conv. %    | Ratio <sup>a</sup> 1:2 | <i>er</i> (1) <sup>b,c</sup> |
|----------|--------------|--------------------------|------------|------------------------|------------------------------|
| 1        | DCDMH        | 1.1                      | 100        | 6:4                    | 80:20                        |
| 2        | DCDPH        | 1.1                      | 100        | 6:4                    | 80:20                        |
| 3        | NCP          | 1.1                      | 0          | nd                     | 0                            |
| 4        | NCSach       | 1.1                      | 100        | 6:4                    | 78:22                        |
| <b>5</b> | <b>DCDMH</b> | <b>2</b>                 | <b>100</b> | <b>6:4</b>             | <b>81:19</b>                 |
| 6        | DCDMH        | 5                        | 100        | 6:4                    | 78:22                        |
| 7        | DCDMH        | 10                       | 100        | 6:4                    | 78:22                        |

[a] Determined by NMR; [b] Determined by chiral HPLC; [c] for compound *a*-**2b**-OEt-Br

With the exception of *N*-chlorophthalimide (NCP, entry 3), all other chlorenium sources gave complete conversion to products. The identity of the chlorenium source does not influence the ratio of **1:2** in a significant manner (ratio was ~6:4). Using 1.1 equivalent of DCDMH and DCDPH showed similar *er* (80:20) for product *a*-**2b**-OEt-Br (entries 1 and 2). Increasing the DCDMH loading to 2 equiv improved the enantiomeric ratio (entry 5). Further increase in the DCDMH loading to 5 or 10 equivalents did not lead to any improvement in the enantioselectivity (entries 5 and 6) for *a*-**2b**-OEt-Br.

#### IV.B. Influence of reaction solvent on the enantioselectivity of the reaction.

**Table S2.** Influence of co-solvent additives on the chemo- and stereoselectivity of the reaction

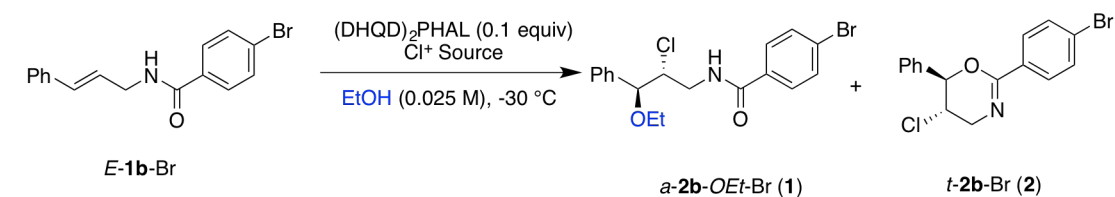

| Entry | Temp | Solvent                | Ratio of 1:2 | <i>er</i> (1) <sup>b,c</sup> |
|-------|------|------------------------|--------------|------------------------------|
| 1     | -30  | EtOH                   | 6:4          | 81:19                        |
| 2     | -30  | EtOH with 10 equiv TFE | 6:4          | 77:23                        |
| 3     | -30  | MeCN:EtOH(1:1)         | 6:4          | 81:19                        |
| 4     | rt   | MeCN:EtOH (7:3)        | 1:1          | 82:18                        |
| 5     | -30  | MeCN:EtOH (7:3)        | 1:1          | 84:16                        |

[a] Determined by NMR; [b] Determined by chiral HPLC; [c] for compound *a*-2b-OEt-Br

Using ethanol as a solvent gave products *a*-2b-OEt-Br and *t*-2b-Br in the ratio of 6:4 and the enantiomeric ratio of 81:19 for *a*-2b-OEt-Br (entry 1). Adding 10 equivalents of TFE decreased the enantioselectivity (entry 2). A 1:1 MeCN-EtOH cosolvent mixture gave slightly improved enantioselectivity (entry 3). Changing the ratio of MeCN to EtOH to 7:3 produced both products in equimolar amounts, but with higher *er* (entry 4). Finally, decreasing the temperature to -30 °C gave higher enantioselectivity of 84:16 *er* (entry 5).

#### V. Analytical data for products

*a*-2b-OMe-NO<sub>2</sub>: *N*-((2*R*,3*S*)-2-chloro-3-methoxy-3-phenylpropyl)-4-nitrobenzamide

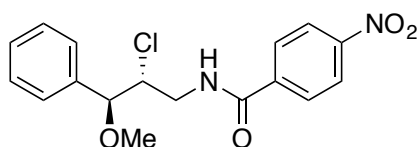

R<sub>f</sub>: 0.20 ( 30% EtOAc in hexanes, UV)

<sup>1</sup>H NMR (500 MHz, CDCl<sub>3</sub>) δ 8.29 (d, *J* = 9.0 Hz, 2H), 7.88 (d, *J* = 9.0 Hz, 2H), 7.40-7.33 (m, 5H), 6.82 (br s, 1H), 4.45 (d, *J* = 4.5 Hz, 1H), 4.25-4.22 (m, 1H), 4.11-4.06 (m, 1H), 3.66-3.61 (m, 1H), 3.34 (s, 3H)

<sup>13</sup>C NMR (125 MHz, CDCl<sub>3</sub>) δ 165.26, 149.64, 139.66, 136.87, 137.22, 128.76, 128.12, 127.18, 123.87, 86.33, 62.60, 57.98, 42.54

HRMS analysis (ESI): Calculated for [M+H]<sup>+</sup>: C<sub>17</sub>H<sub>18</sub>ClN<sub>2</sub>O<sub>4</sub>: 349.0955; Found: 349.0950

Resolution of enantiomers: DAICEL Chiralcel<sup>®</sup> Oj-H column, 20% IPA-Hexanes, 1.0 mL/min, 265 nm, RT1 (minor) = 27.0 min, RT2 (major) = 30.1 min

[α]<sub>D</sub><sup>20</sup> = +46.7 (c 0.5, CHCl<sub>3</sub>, *er* = 92:8)

*a*-**2d**-OMe-NO<sub>2</sub>: *N*-((2*R*,3*S*)-2-chloro-3-(4-fluorophenyl)-3-methoxypropyl)-4-nitrobenzamide

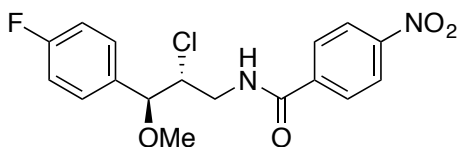

R<sub>f</sub>: 0.19 (30% EtOAc in hexanes, UV)

<sup>1</sup>H NMR (500 MHz, CDCl<sub>3</sub>) δ 8.29 (d, *J* = 9.0 Hz, 2H), 7.91 (d, *J* = 9.0 Hz, 2H), 7.33-7.30 (m, 2H), 7.09-7.06 (m, 2H), 6.77 (br s, 1H), 4.38 (d, *J* = 4.5 Hz, 1H) 4.19-4.18 (m, 1H), 4.13-4.09 (m, 1H), 3.65-3.63 (m, 1H), 3.31 (s, 3H)

<sup>13</sup>C NMR (125 MHz, CDCl<sub>3</sub>) δ 165.32, 149.65, 139.81, 133.74, 129.08 (d, *J*<sub>CF</sub> = 30 Hz) 128.12, 123.91, 115.81, 115.63, 85.55, 62.79, 57.79, 42.77

HRMS analysis (ESI): Calculated for [M+H]<sup>+</sup>: C<sub>17</sub>H<sub>17</sub>ClFN<sub>2</sub>O<sub>4</sub>: 367.0861; Found: 367.0844

Resolution of enantiomers: CHIRALCEL OJ-H 12% IPA-Hexane, 0.7 ml/min, RT1 (minor) = 64.6, RT2 (major) = 69.6; [α]<sub>D</sub><sup>20</sup> = -5.0 (c 0.1, CHCl<sub>3</sub>, *er* = 89:11)

*a-2c-OMe-NO<sub>2</sub>*: *N*-((2*R*,3*S*)-2-chloro-3-methoxyhexyl)-4-nitrobenzamide

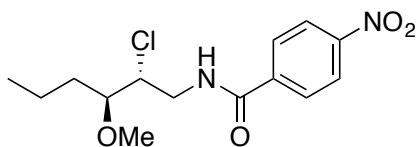

$R_f$ : 0.38 (30% EtOAc in hexanes, UV)

<sup>1</sup>H NMR (500 MHz, CDCl<sub>3</sub>)  $\delta$  8.29 (d,  $J = 9.0$  Hz, 2H), 7.93 (d,  $J = 9.0$  Hz, 2H), 7.24 (br s, 1H), 4.16-4.10 (m, 2H), 3.60-3.56 (m, 1H), 3.49-3.47 (m, 4H), 1.68-1.62 (m, 2H), 1.54-1.35 (m, 2H), 0.95 (m, 3H)

<sup>13</sup>C NMR (125 MHz, CDCl<sub>3</sub>)  $\delta$  165.40, 149.70, 139.86, 128.14, 123.90, 83.90, 61.78, 59.37, 42.92, 33.69, 18.46, 14.09

HRMS analysis (ESI): Calculated for [M-H]<sup>-</sup>: C<sub>14</sub>H<sub>18</sub>ClN<sub>2</sub>O<sub>4</sub>: 313.0955; Found: 313.0953

Resolution of enantiomers: DAICEL Chiralcel<sup>®</sup> AD-H column, 7% IPA-Hexanes, 0.5 mL/min, 254 nm, RT1 (major) = 32.6 min, RT2 (major) = 34.7 min.

$[\alpha]_D^{20} = -30$  (c 0.25, CHCl<sub>3</sub>, *er* = 87:13)

*a-2a-OMe-NO<sub>2</sub>*: *N*-((2*R*,3*S*)-2-chloro-3-cyclohexyl-3-methoxypropyl)-4-nitrobenzamide

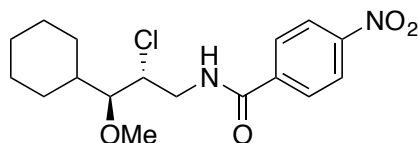

$R_f$ : 0.36 (30% EtOAc in hexanes, UV)

<sup>1</sup>H NMR (500 MHz, CDCl<sub>3</sub>)  $\delta$  8.29 (d,  $J = 9.0$  Hz, 2H), 7.92 (d,  $J = 9.0$  Hz, 2H), 7.00 (br s, 1H), 4.33-4.30 (m, 1H), 4.15-4.10 (m, 1H), 3.63-3.58 (m, 4H), 3.22-3.20 (dd,  $J = 7.0, 4.0$  Hz, 1H), 1.94-1.91 (m, 1H), 1.77-1.74 (m, 2H), 1.68-1.63 (m, 2H), 1.27-1.05 (m, 6H)

<sup>13</sup>C NMR (125 MHz, CDCl<sub>3</sub>)  $\delta$  165.40, 149.69, 139.91, 128.12, 123.88, 89.50, 62.64, 60.87, 42.71, 41.32, 29.67, 28.70, 26.20, 25.99, 25.86

HRMS analysis (ESI): Calculated for [M-H]<sup>-</sup>: C<sub>17</sub>H<sub>22</sub>ClN<sub>2</sub>O<sub>4</sub>: 353.1268; Found: 353.1261

Resolution of enantiomers: DAICEL Chiralcel<sup>®</sup> OJ-H column, 10% IPA-Hexanes, 1.0 mL/min, 254 nm, RT1 (major) = 11.8 min, RT2 (minor) = 16.1 min.

$[\alpha]_D^{20} = -4.0$  (c 0.6, CHCl<sub>3</sub>, *er* = 75:25)



**a-2e-OMe-NO<sub>2</sub>**: *N*-((2*R*,3*S*)-4-(benzyloxy)-2-chloro-3-methoxybutyl)-4-nitrobenzamide

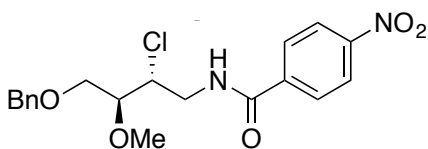

R<sub>f</sub>: 0.16 (30% EtOAc in hexanes, UV)

<sup>1</sup>H NMR (500 MHz, CDCl<sub>3</sub>) δ 8.25 (d, *J* = 9.0 Hz, 2H), 7.85 (d, *J* = 9.0 Hz, 2H), 7.35-7.29, (m, 5H), 6.87 (br s, 1H), 4.56 (d, *J* = 1 Hz, 2H), 4.36-4.33 (m, 1H), 3.99-3.95 (m, 1H), 3.83-3.79 (m, 1H), 3.75-3.72 (dd, *J*=10.0, 5.0 Hz, 1H), 3.69-3.66 (dd, *J*=10.0, 5.0 Hz, 1H), 3.49 (s, 3H)

<sup>13</sup>C NMR (125 MHz, CDCl<sub>3</sub>) δ 165.24, 149.60, 139.78, 137.45, 128.55, 128.11, 128.02, 127.83, 123.83, 82.33, 73.76, 68.17, 59.11, 59.08, 24.90

HRMS analysis (ESI): Calculated for [M-H]<sup>-</sup>: C<sub>19</sub>H<sub>20</sub>ClN<sub>2</sub>O<sub>5</sub>: 391.1061; Found: 391.1057

Resolution of enantiomers: DAICEL Chiralcel<sup>®</sup> IA column, 20% IPA-Hexanes, 1.0 mL/min, 254 nm, RT1 (major) = 11.0 min, RT2 (minor) = 11.8 min.

[α]<sub>D</sub><sup>20</sup> = +5.2 (c 0.5, CHCl<sub>3</sub>, *er* = 88:12)

**s-2b-OMe-NO<sub>2</sub>**: *N*-((2*R*,3*R*)-2-chloro-3-methoxy-3-phenylpropyl)-4-nitrobenzamide

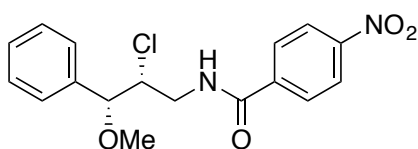

R<sub>f</sub>: 0.22 (30% EtOAc in hexanes, UV)

<sup>1</sup>H NMR (500 MHz, CDCl<sub>3</sub>) δ 8.27 (d, *J* = 9.0 Hz, 2H), 7.86 (d, *J* = 9.0 Hz, 2H), 7.41-7.24 (m, 5H), 6.57 (br s, 1H), 4.41 (d, *J* = 4.5 Hz, 1H), 4.29-4.28 (m, 1H), 4.00-3.95 (m, 1H), 3.56-3.52 (m, 2H), 3.27 (s, 3H)

<sup>13</sup>C NMR (125 MHz, CDCl<sub>3</sub>) δ 165.32, 149.75, 139.66, 136.83, 123.84, 128.68, 128.13, 127.49, 123.87, 85.03, 63.63, 57.44, 43.80

HRMS analysis (ESI): Calculated for [M+H]<sup>+</sup>: C<sub>17</sub>H<sub>18</sub>ClN<sub>2</sub>O<sub>4</sub>: 349.0955; Found: 349.0955

Resolution of enantiomers: DAICEL Chiralcel<sup>®</sup> AD-H column, 10% IPA-Hexanes, 1.0 mL/min, 254 nm, RT1 (major) = 22.8 min, RT2 (minor) = 29.9 min.

$[\alpha]_D^{20} = -8.0$  (c 0.1,  $\text{CHCl}_3$ ,  $er = 99.5:0.5$ )

*a*-**2f**-OMe-NO<sub>2</sub>: *N*-((2*R*,3*R*)-2-chloro-3-methoxy-3-(*p*-tolyl)propyl)-4-nitrobenzamide

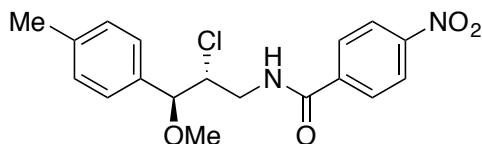

$R_f$ : 0.27 (30% EtOAc in hexanes, UV)

<sup>1</sup>H NMR (500 MHz,  $\text{CDCl}_3$ )  $\delta$  8.29 (d,  $J = 9.0$  Hz, 2H), 7.89 (d,  $J = 9.0$  Hz, 2H), 7.22-7.18 (m, 4H), 6.86 (br s, 1H), 4.24 (d,  $J = 5.5$  Hz, 1H), 4.23-4.20 (m, 1H), 4.10-4.05 (m, 1H), 3.65-3.60 (m, 1H), 3.33 (s, 3H), 2.34 (s, 3H)

<sup>13</sup>C NMR (125 MHz,  $\text{CDCl}_3$ )  $\delta$  165.27, 149.67, 139.64, 138.74, 133.73, 129.41, 128.13, 127.38, 123.86, 84.94, 63.72, 57.29, 43.75, 21.21

HRMS analysis (ESI): Calculated for  $[\text{M-H}]^-$ :  $\text{C}_{18}\text{H}_{18}\text{ClN}_2\text{O}_4$ : 361.0955; Found: 361.0955

Resolution of enantiomers: DAICEL Chiralcel<sup>®</sup> AD-H column, 15% IPA-Hexanes, 1.0 mL/min, 265 nm, RT1 (major) = 13.6 min, RT2 (minor) = 16.6 min.

$[\alpha]_D^{20} = +14.9$  (c 0.7,  $\text{CHCl}_3$ ,  $er = 97:3$ )

*s*-**2f**-OMe-NO<sub>2</sub>: *N*-((2*R*,3*R*)-2-chloro-3-methoxy-3-(*p*-tolyl)propyl)-4-nitrobenzamide

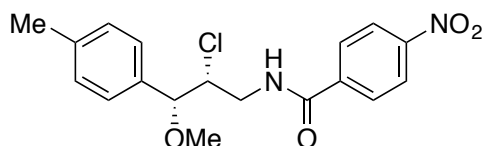

$R_f$ : 0.27 (30% EtOAc in hexanes, UV)

<sup>1</sup>H NMR (500 MHz,  $\text{CDCl}_3$ )  $\delta$  8.29 (d,  $J = 9.0$  Hz, 2H), 7.85 (d,  $J = 9.0$  Hz, 2H), 7.22-7.10 (m, 4H), 6.55 (br s, 1H), 4.39 (d,  $J = 5.0$  Hz, 1H), 4.38-4.24 (m, 1H), 3.95-3.94 (m, 1H), 3.55-3.50 (m, 1H), 3.30 (s, 3H), 2.35 (s, 3H)

<sup>13</sup>C NMR (125 MHz,  $\text{CDCl}_3$ )  $\delta$  165.22, 149.63, 139.91, 138.63, 134.15, 129.46, 128.12, 127.10, 123.85, 86.22, 62.65, 57.86, 42.56, 21.19

HRMS analysis (ESI): Calculated for  $[\text{M-H}]^-$ :  $\text{C}_{18}\text{H}_{18}\text{ClN}_2\text{O}_4$ : 361.0955; Found: 361.0955

Resolution of enantiomers: DAICEL Chiralcel<sup>®</sup> OD-H column, 15% IPA-Hexanes, 1.0 mL/min, 254 nm, RT1 (major) = 17.8 min, RT2 (minor) = 25.0 min.

$[\alpha]_D^{20} = -7.1$  (c 0.6, CHCl<sub>3</sub>, *er* = 99:1)

**2g-OMe-NO<sub>2</sub>**: *N*-2-chloro-3-methoxy-3-(4-methoxyphenyl)propyl)-4-nitrobenzamide  
(note: the relative stereochemistry of the two diastereomeric products below was not identified.)

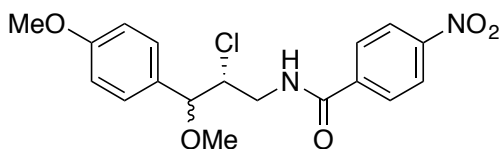

R<sub>f</sub>: 0.16 (30% EtOAc in hexanes, UV)

<sup>1</sup>H NMR (500 MHz, CDCl<sub>3</sub>) δ 8.28 (d, *J* = 9.0 Hz, 2H), 7.87 (d, *J* = 9.0 Hz, 2H), 7.28 (d, *J* = 8 Hz, 2H), 6.92 (d, *J* = 8 Hz, 2H), 6.57 (br s, 1H), 4.37 (d, *J* = 5.5 Hz, 1H), 4.27-4.23 (m, 1H), 3.96-3.92 (m, 1H), 3.80 (s, 3H), 3.53-3.48 (m, 1H), 3.29 (s, 3H)

<sup>13</sup>C NMR (125 MHz, CDCl<sub>3</sub>) δ 165.24, 159.87, 149.64, 139.89, 129.09, 128.44, 128.13, 123.87, 114.10, 85.91, 62.79, 57.70, 55.28, 42.67

HRMS analysis (ESI): Calculated for [M-H]<sup>-</sup>: C<sub>18</sub>H<sub>18</sub>ClN<sub>2</sub>O<sub>5</sub> 377.0904; Found: 377.0899

Resolution of enantiomers: DAICEL Chiralcel<sup>®</sup> OD-H column, 2% IPA-Hexanes, 01.0 mL/min, 254 nm, RT1 (minor) = 21.6 min, RT2 (major) = 25.7 min.

$[\alpha]_D^{20} = +17$  (c 0.25, CHCl<sub>3</sub>, *er* = 99:1)

*epi*-**2g-OMe-NO<sub>2</sub>**: *N*-((2*R*,3*R*)-2-chloro-3-methoxy-3-(4-methoxyphenyl)propyl)-4-nitrobenzamide

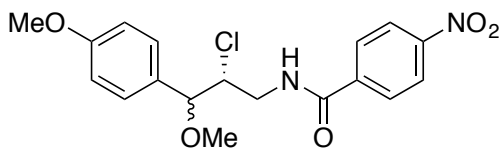

R<sub>f</sub>: 0.16 (30% EtOAc in hexanes, UV)

<sup>1</sup>H NMR (500 MHz, CDCl<sub>3</sub>) δ 8.29 (d, *J* = 9.0 Hz, 2H), 7.90 (d, *J* = 9.0 Hz, 2H), 7.26 (d, *J* = 8.0 Hz, 2H), 6.91 (d, *J* = 8.0 Hz, 2H), 6.85 (br s, 1H), 4.39 (d, *J* = 6.0 Hz, 1H) 4.22-4.18 (m, 1H), 4.11-4.06 (m, 1H), 3.80 (s, 3H), 3.65-3.60 (m, 1H), 3.31 (s, 3H)

$^{13}\text{C}$  NMR (125 MHz,  $\text{CDCl}_3$ )  $\delta$  165.27, 159.97, 149.68, 139.63, 128.69, 128.12, 123.86, 114.08, 84.66, 63.83, 57.18, 55.27, 43.71

HRMS analysis (ESI): Calculated for  $[\text{M}-\text{H}]^-$ :  $\text{C}_{18}\text{H}_{18}\text{ClN}_2\text{O}_5$  377.0904; Found: 377.0901

Resolution of enantiomers: DAICEL Chiralcel<sup>®</sup> IA column, 20% IPA-Hexanes, 1.0 mL/min, 254 nm, RT1 (major) = 11.9 min, RT2 (minor) = 13.8 min.

$[\alpha]_{\text{D}}^{20} = -13.0$  (c 0.25,  $\text{CHCl}_3$ ,  $er = 92:8$ )

*s*-**2h**-OMe-NO<sub>2</sub>: *N*-((2*R*,3*R*)-2-chloro-3-methoxypentyl)-4-nitrobenzamide

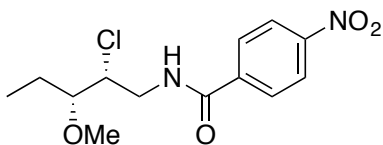

$R_f$ : 0.20 (30% EtOAc in hexanes, UV)

$^1\text{H}$  NMR (500 MHz,  $\text{CDCl}_3$ )  $\delta$  8.30 (d,  $J = 9.0$  Hz, 2H), 7.94 (d,  $J = 9.0$  Hz, 2H), 6.83 (br s, 1H), 4.28-4.25 (m, 1H), 4.14-4.09 (m, 1H), 3.60-3.51 (m, 1H), 3.46 (s, 3H), 3.61-3.34 (m, 1H), 1.75-1.69 (m, 2H), 0.98 (t,  $J = 7.5$  Hz, 3H)

$^{13}\text{C}$  NMR (125 MHz,  $\text{CDCl}_3$ )  $\delta$  165.49, 149.69, 139.69, 128.16, 123.90, 84.10, 60.96, 58.21, 43.92, 22.90, 9.92

HRMS analysis (ESI): Calculated for  $[\text{M}+\text{H}]^+$ :  $\text{C}_{13}\text{H}_{16}\text{ClN}_2\text{O}_4$  299.0799; Found: 299.0796

Resolution of enantiomers: DAICEL Chiralcel<sup>®</sup> AD-H column, 7% IPA-Hexanes, 1.0 mL/min, 254 nm, RT1 (minor) = 22.2 min, RT2 (major) = 24.7 min.

$[\alpha]_{\text{D}}^{20} = +30.0$  (c 0.39,  $\text{CHCl}_3$ ,  $er = 98:2$ )

*s*-**2i**-OMe-NO<sub>2</sub>: *N*-((2*R*,3*R*)-2-chloro-3-methoxynonyl)-4-nitrobenzamide

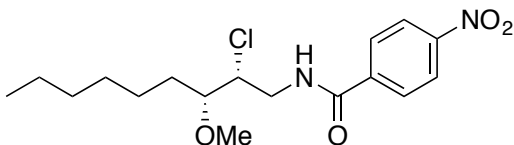

$R_f$ : 0.30 (30% EtOAc in hexanes, UV)

$^1\text{H}$  NMR (500 MHz,  $\text{CDCl}_3$ )  $\delta$  8.33 (d,  $J = 9.0$  Hz, 2H), 7.97 (d,  $J = 9.0$  Hz, 2H), 6.85 (br s, 1H), 4.30-4.27 (m, 1H), 4.16-4.15 (m, 1H), 3.64-3.58 (m, 1H), 3.45 (s, 3H), 3.44-3.41 (m, 1H), 1.72-1.68 (m, 2H), 1.39-1.25 (m, 8H), 0.90 (t,  $J = 7.0$  Hz, 3H)

$^{13}\text{C}$  NMR (125 MHz,  $\text{CDCl}_3$ )  $\delta$  165.46, 149.70, 139.70, 128.15, 123.91, 82.90, 61.09, 58.25, 43.82, 31.68, 29.92, 29.25, 25.57, 22.55, 14.06

HRMS analysis (ESI): Calculated for  $[\text{M-H}]^-$ :  $\text{C}_{16}\text{H}_{22}\text{ClN}_2\text{O}_4$ : 341.1268; Found: 341.1272

Resolution of enantiomers: DAICEL Chiralcel<sup>®</sup> AD-H column, 10% IPA-Hexanes, 1.0 mL/min, 254 nm, RT1 (major) = 10.5 min, RT2 (minor) = 12.7 min.

$[\alpha]_D^{20} = +16.5$  (c 0.6,  $\text{CHCl}_3$ ,  $er = 95:5$ )

*s*-**2c**-OMe-NO<sub>2</sub>: *N*-((2*R*,3*R*)-2-chloro-3-methoxyhexyl)-4-nitrobenzamide

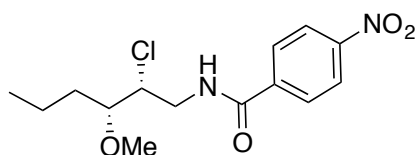

$R_f$ : 0.25 (30% EtOAc in hexanes, UV)

$^1\text{H}$  NMR (500 MHz,  $\text{CDCl}_3$ )  $\delta$  8.29 (d,  $J = 9.0$  Hz, 2H), 7.93 (d,  $J = 9.0$  Hz, 2H), 6.79 (br s, 1H), 4.25-4.23 (m, 1H), 4.13-4.08 (m, 1H), 3.61-3.55 (m, 1H), 3.45 -3.41(m, 4H), 1.68-1.62 (m, 2H), 1.54-1.35 (m, 2H), 0.95 (t,  $J = 7.5$  Hz, 3H)

$^{13}\text{C}$  NMR (125 MHz,  $\text{CDCl}_3$ )  $\delta$  165.44, 149.74, 139.73, 128.14, 123.90, 82.70, 61.04, 58.27, 43.78, 32.08, 18.90, 14.04

HRMS analysis (ESI): Calculated for  $[\text{M+H}]^+$ :  $\text{C}_{14}\text{H}_{20}\text{ClN}_2\text{O}_4$ : 315.1112; Found: 315.1116

Resolution of enantiomers: DAICEL Chiralcel<sup>®</sup> AD-H column, 10% IPA-Hexanes, 1.0 mL/min, 254 nm, RT1 (major) = 12.1 min, RT2 (minor) = 14.0 min.

$[\alpha]_D^{20} = +19.0$  (c 0.1,  $\text{CHCl}_3$ ,  $er = 99.5:0.5$ )

Absolute stereochemistry was determined by single crystal X-ray diffraction (XRD). Crystals for XRD were obtained by crystallization from  $\text{CH}_2\text{Cl}_2$  layered with hexanes in a silicone-coated vial.

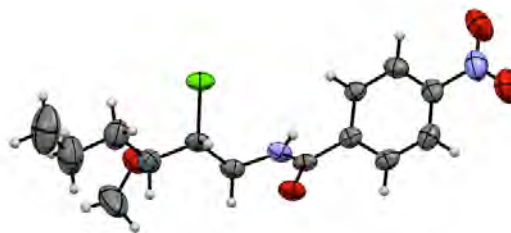

*epi-s-2c-OMe-NO<sub>2</sub>*: *N*-((2*S*,3*S*)-2-chloro-3-methoxyhexyl)-4-nitrobenzamide

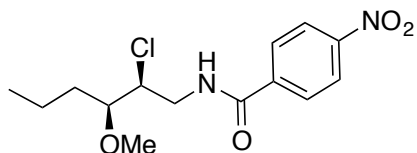

R<sub>f</sub>: 0.25 (30% EtOAc in hexanes, UV) 64% yield with (DHQ)<sub>2</sub>PHAL

<sup>1</sup>H NMR (500 MHz, CDCl<sub>3</sub>) δ 8.29 (d, *J* = 9.0 Hz, 2H), 7.93 (d, *J* = 9.0 Hz, 2H), 6.79 (br s, 1H), 4.25-4.23 (m, 1H), 4.13-4.08 (m, 1H), 3.61-3.55 (m, 1H), 3.45 -3.41(m, 4H), 1.68-1.62 (m, 2H), 1.54-1.35 (m, 2H), 0.95 (t, *J* = 7.5 Hz, 3H)

<sup>13</sup>C NMR (125 MHz, CDCl<sub>3</sub>) δ 165.44, 149.74, 139.73, 128.14, 123.90, 82,70, 61.04, 58.27, 43.78, 32.08, 18.90, 14.04

HRMS analysis (ESI): Calculated for [M+H]<sup>+</sup>: C<sub>14</sub>H<sub>20</sub>ClN<sub>2</sub>O<sub>4</sub>: 315.1112; Found: 315.1116

Resolution of enantiomers: DAICEL Chiralcel<sup>®</sup> AD-H column, 10% IPA-Hexanes, 1.0 mL/min, 254 nm, RT1 (minor) = 11.4 min, RT2 (major) = 14.4 min.

[α]<sub>D</sub><sup>20</sup> = -19.8 (c = 0.5, CHCl<sub>3</sub>, *er* = 95.0:5.0)

*s-2e-OMe-NO<sub>2</sub>*: *N*-((2*R*,3*R*)-4-(benzyloxy)-2-chloro-3-methoxybutyl)-4-nitrobenzamide

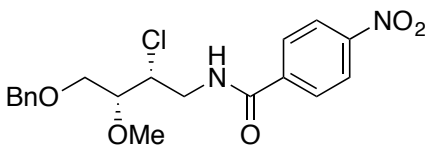

R<sub>f</sub>: 0.23 (30% EtOAc in hexanes, UV)

<sup>1</sup>H NMR (500 MHz, CDCl<sub>3</sub>) δ 8.25 (d, *J* = 9.0 Hz, 2H), 7.85 (d, *J* = 9.0 Hz, 2H), 7.34-7.32 (m, 5H), 6.79 (br s, 1H), 4.55 (s, 2H), 4.38-4.35 (m, 1H), 4.17-4.03 (m, 1H), 3.80-3.77 (dd, *J* = 9.5, 4.5 Hz, 1H), 3.78-3.67 (m, 3H), 3.48 (s, 3H)

<sup>13</sup>C NMR (125 MHz, CDCl<sub>3</sub>) δ 165.40, 149.60, 139.76, 137.46, 128.53, 128.01, 127.82, 123.83, 81.28, 73.82, 68.40, 59.72, 58.85, 43.76

HRMS analysis (ESI): Calculated for [M-H]<sup>-</sup>: C<sub>19</sub>H<sub>20</sub>ClN<sub>2</sub>O<sub>5</sub>: 391.1061; Found: 391.1060

Resolution of enantiomers: DAICEL Chiralcel<sup>®</sup> IA column, 10% IPA-Hexanes, 1.0 mL/min, 254 nm, RT1 (minor) = 24.6 min, RT2 (major) = 26.8 min.

$[\alpha]_D^{20} = +4.1$  (c 0.45,  $\text{CHCl}_3$ ,  $er = 99:1$ )

**s-2j-OMe-NO<sub>2</sub>**: *N*-((2*R*,3*R*)-5-((*tert*-butyldiphenylsilyl)oxy)-2-chloro-3-methoxypentyl)-4-nitrobenzamide

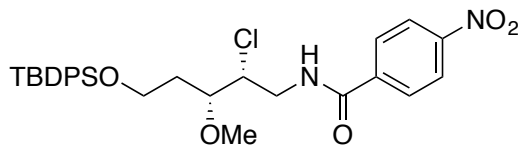

$R_f$ : 0.38 (30% EtOAc in hexanes, UV)

<sup>1</sup>H NMR (500 MHz,  $\text{CDCl}_3$ )  $\delta$  8.28 (d,  $J = 9.0$  Hz, 2H), 7.92 (d,  $J = 9.0$  Hz, 2H), 7.65-7.63 (m, 5H), 7.41-7.37 (m, 5H), 6.77 (br s, 1H), 4.27 (m, 1H) 4.10-4.07 (m, 1H), 3.81-3.76 (m, 3H), 3.61-3.58 (m, 1H), 3.42 (s, 3H), 1.99-1.94 (m, 1H), 1.81-1.78 (m, 1H), 1.25-1.21 (m, 2H), 1.04 (s, 9H)

<sup>13</sup>C NMR (125 MHz,  $\text{CDCl}_3$ )  $\delta$  165.37, 149.73, 139.76, 135.54, 133.49, 133.44, 129.77, 128.13, 127.74, 123.90, 79.76, 61.18, 59.98, 58.42, 43.73, 32.90, 26.86, 19.18

HRMS analysis (ESI): Calculated for  $[\text{M}+\text{H}]^+$ :  $\text{C}_{29}\text{H}_{36}\text{ClN}_2\text{O}_5\text{Si}$ : 555.2082; Found: 555.2089

Resolution of enantiomers: DAICEL Chiralcel<sup>®</sup> AD-H column, 3% IPA-Hexanes, 0.7 mL/min, 254 nm, RT1 (minor) = 34.3 min, RT2 (major) = 37.0 min.

$[\alpha]_D^{20} = +17.0$  (c 0.1,  $\text{CHCl}_3$ ,  $er = 99.5:0.5$ )

**2k-OMe-NO<sub>2</sub>**: (*R*)-*N*-(2-chloro-3-methoxy-3-methylbutyl)-4-nitrobenzamide

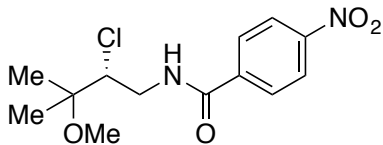

$R_f$ : 0.20 (30% EtOAc in hexanes, UV)

<sup>1</sup>H NMR (500 MHz,  $\text{CDCl}_3$ )  $\delta$  8.29 (d,  $J = 9.0$  Hz, 2H), 7.93 (d,  $J = 9.0$  Hz, 2H), 6.93 (br s, 1H), 4.23-4.19 (m, 1H) 4.07-4.054 (m, 1H), 3.25-3.48 (m, 1H), 3.56-3.52 (m, 1H), 3.30 (s, 3H), 1.35 (s, 3H), 1.32 (s, 3H)

<sup>13</sup>C NMR (125 MHz,  $\text{CDCl}_3$ )  $\delta$  165.32, 149.68, 139.89, 128.10, 123.86, 77.38, 66.77, 49.95, 42.89, 22.97, 21.09

HRMS analysis (ESI): Calculated for  $[M+H]^+$ :  $C_{13}H_{18}ClN_2O_4$ : 301.0955; Found: 301.0959

Resolution of enantiomers: DAICEL Chiralcel<sup>®</sup> OJ-H column, 5% IPA-Hexanes, 0.7 mL/min, 254 nm, RT1 (minor) = 28.3 min, RT2 (major) = 31.0 min.

$[\alpha]_D^{20} = +14.0$  (c 0.1,  $CHCl_3$ ,  $er = 99.5:0.5$ )

*s*-**2c**-OEt-NO<sub>2</sub>: *N*-((2*R*,3*R*)-2-chloro-3-ethoxyhexyl)-4-nitrobenzamide

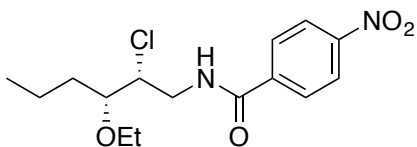

$R_f$ : 0.25 (30% EtOAc in hexanes, UV)

<sup>1</sup>H NMR (500 MHz,  $CDCl_3$ )  $\delta$  8.29 (d,  $J = 8.5$  Hz, 2H), 7.94 (d,  $J = 8.5$  Hz, 2H), 6.92 (br s, 1H), 4.25-4.24 (m, 1H), 4.12-4.07 (m, 1H), 3.64-3.57 (m, 3H), 3.55-3.52 (m, 1H), 1.72-1.66 (m, 1H), 1.61-1.55 (m, 1H), 1.55-1.43 (m, 1H), 1.43-1.35 (m, 1H), 1.20 (t,  $J = 6.5$  Hz, 3H), 0.95 (t,  $J = 7.5$  Hz, 3H)

<sup>13</sup>C NMR (125 MHz,  $CDCl_3$ )  $\delta$  165.35, 149.68, 139.75, 128.15, 123.90, 81.33, 66.15, 60.75, 43.70, 32.30, 19.03, 15.61, 14.05

HRMS analysis (ESI): Calculated for  $[M-H]^-$ :  $C_{15}H_{22}ClN_2O_4$ : 329.1268; Found: 329.1273

Resolution of enantiomers: DAICEL Chiralcel<sup>®</sup> IA column, 5% IPA-Hexanes, 1.0 mL/min, 254 nm, RT1 (major) = 20.3 min, RT2 (minor) = 22.0 min.

$[\alpha]_D^{20} = +21.3$  (c 0.7,  $CHCl_3$ ,  $er = 99.5:0.5$ )

*s*-**2c**-OAllyl-NO<sub>2</sub>: *N*-((2*R*,3*R*)-3-(allyloxy)-2-chlorohexyl)-4-nitrobenzamide

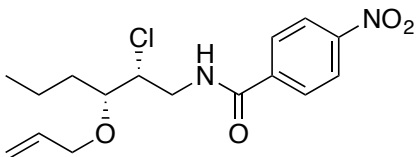

$R_f$ : 0.40 (30% EtOAc in hexanes, UV)

<sup>1</sup>H NMR (500 MHz,  $CDCl_3$ )  $\delta$  8.28 (d,  $J = 9.0$  Hz, 2H), 7.93 (d,  $J = 8.5$  Hz, 2H), 6.87 (br s, 1H), 5.94-5.87 (m, 1H), 5.30 (dd,  $J = 15.0, 1.5$  Hz, 1H), 5.21 (dd,  $J = 15.0, 1.5$  Hz,



1H), 4.26-4.23 (m, 1H), 4.12-4.06 (m, 3H), 3.64-3.59 (m, 2H), 1.72-1.70 (m, 1H), 1.64-1.57 (m, 1H), 1.54-1.37 (m, 2H), 0.93 (t,  $J = 9$  Hz, 3H)

$^{13}\text{C}$  NMR (125 MHz,  $\text{CDCl}_3$ )  $\delta$  165.36, 149.69, 139.65, 134.22, 128.20, 123.86, 118.10, 80.57, 71.44, 60.62, 43.70, 32.20, 18.97, 14.04

HRMS analysis (ESI): Calculated for  $[\text{M-H}]^-$ :  $\text{C}_{16}\text{H}_{20}\text{ClN}_2\text{O}_4$ : 339.1112; Found: 339.1107

Resolution of enantiomers: DAICEL Chiralcel<sup>®</sup> IA column, 7% IPA-Hexanes, 1.0 mL/min, 254 nm, RT1 (minor) = 16.9 min, RT2 (major) = 17.8 min.

$[\alpha]_{\text{D}}^{20} = +13.7$  (c 0.5,  $\text{CHCl}_3$ ,  $er = 99.5:0.5$ )

*s*-**2c**-OPropargyl-NO<sub>2</sub>: *N*-((2*R*,3*R*)-2-chloro-3-(prop-2-yn-1-yloxy)hexyl)-4-nitrobenzamide

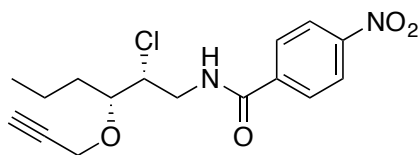

$R_f$ : 0.40 (30% EtOAc in hexanes, UV)

$^1\text{H}$  NMR (500 MHz,  $\text{CDCl}_3$ )  $\delta$  8.28 (d,  $J = 9.0$  Hz, 2H), 7.93 (d,  $J = 8.5$  Hz, 2H), 6.87 (br s, 1H), 4.36-4.33 (dd,  $J = 16.5, 2.5$  Hz, 1H), 4.32-4.29 (m, 1H), 4.25-4.21 (dd,  $J = 16.5, 2.5$  Hz, 1H), 4.10-4.05 (m, 1H), 3.83-3.80 (m, 1H), 3.69-3.64 (m, 1H), 1.72-1.70 (m, 1H), 1.64-1.57 (m, 1H), 1.54-1.37 (m, 2H), 0.96 (t,  $J = 9$  Hz, 3H)

$^{13}\text{C}$  NMR (125 MHz,  $\text{CDCl}_3$ )  $\delta$  165.49, 149.72, 139.70, 128.21, 123.88, 79.61, 79.02, 75.15, 60.60, 56.67, 43.70, 31.90, 18.72, 14.05

HRMS analysis (ESI): Calculated for  $[\text{M-H}]^-$ :  $\text{C}_{16}\text{H}_{18}\text{ClN}_2\text{O}_4$ : 337.0955; Found: 337.0951

Resolution of enantiomers: DAICEL Chiralcel<sup>®</sup> IA column, 10% IPA-Hexanes, 1.0 mL/min, 265 nm, RT1 (minor) = 18.8 min, RT2 (major) = 20.3 min.

$[\alpha]_{\text{D}}^{20} = +14.0$  (c 0.1,  $\text{CHCl}_3$ ,  $er = 98:2$ )

*s*-**2c**-OAc-NO<sub>2</sub>: (2*R*, 3*R*)-2-chloro-1-(4-nitrobenzamido)hexan-3-yl acetate

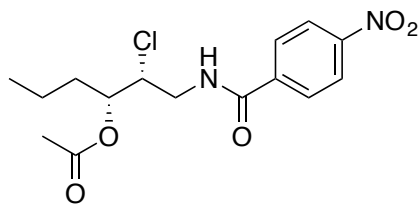

R<sub>f</sub>: 0.30 (30% EtOAc in hexanes, UV)

<sup>1</sup>H NMR (500 MHz, CDCl<sub>3</sub>) δ 8.30 (d, *J* = 8.5 Hz, 2H), 7.97 (d, *J* = 8.5 Hz, 2H), 7.10 (br s, 1H), 5.17-5.14 (m, 1H), 4.16-4.13 (m, 1H), 4.00-3.95 (m, 1H), 3.36-3.24 (m, 1H), 2.17 (s, 3H), 1.84-1.81 (m, 1H), 1.63-1.61 (m, 1H), 1.35-1.31 (m, 2H), 0.91 (t, *J* = 7.5, 3H)

<sup>13</sup>C NMR (125 MHz, CDCl<sub>3</sub>) δ 172.10, 165.13, 149.83, 139.21, 128.20, 123.92, 72.11, 60.32, 42.70, 33.68, 20.92, 18.65, 13.64

HRMS analysis (ESI): Calculated for [M+H]<sup>+</sup>: C<sub>15</sub>H<sub>20</sub>ClN<sub>2</sub>O<sub>5</sub>: 343.1061; Found: 343.1062

Resolution of enantiomers: DAICEL Chiralcel<sup>®</sup> AD-H column, 7% IPA-Hexanes, 01.0 mL/min, 254 nm, RT1 (major) = 17.6 min, RT2 (minor) = 18.9 min.

[α]<sub>D</sub><sup>20</sup> = -8.0 (c 0.1, CHCl<sub>3</sub>, *er* = 98:2)

*s*-**2c**-OH-NO<sub>2</sub>: *N*-((2*R*,3*R*)-2-chloro-3-hydroxyhexyl)-4-nitrobenzamide

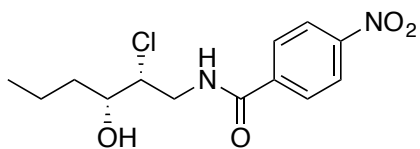

R<sub>f</sub>: 0.12 (30% EtOAc in hexanes, UV)

<sup>1</sup>H NMR (500 MHz, CD<sub>3</sub>CN) δ 8.28 (d, *J* = 9.0 Hz, 2H), 7.98 (d, *J* = 8.5 Hz, 2H), 6.93 (br s, 1H), 4.14-4.11 (dt, *J* = 7.0, 2.0 Hz, 2H), 3.90-3.84 (m, 1H), 3.79-3.76 (m, 1H), 3.60-3.55 (m, 1H), 3.41 (d, *J* = 6.5 Hz, 1H), 1.60-1.56 (m, 1H), 1.53-1.42 (m, 2H), 1.36-1.31 (m, 1H), 0.91 (t, *J* = 7.5 Hz, 3H)

<sup>13</sup>C NMR (125 MHz, CDCl<sub>3</sub>) δ 166.39, 150.08, 140.11, 128.83, 124.02, 70.37, 65.07, 43.79, 36.47, 19.04, 13.61

HRMS analysis (ESI): Calculated for [M-H]<sup>-</sup>: C<sub>13</sub>H<sub>16</sub>ClN<sub>2</sub>O<sub>4</sub>: 299.0799; Found: 299.0796

Resolution of enantiomers: DAICEL Chiralcel<sup>®</sup> IA column, 15% IPA-Hexanes, 1.0 mL/min, 265 nm, RT1 (major) = 12.3 min, RT2 (minor) = 13.8 min.

$[\alpha]_D^{20} = +14.6$  (c 0.9, CHCl<sub>3</sub>, *er* = 99:1)

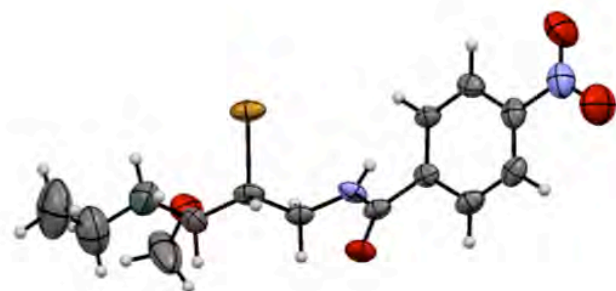

*a*-2c-OAc-NO<sub>2</sub>: (2*R*,3*S*)-2-chloro-1-(4-nitrobenzamido)hexan-3-yl acetate

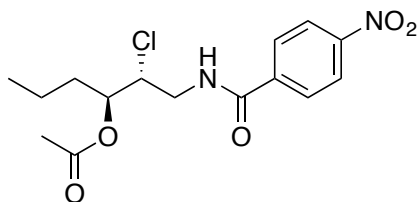

R<sub>f</sub>: 0.28 (30% EtOAc in hexanes, UV)

<sup>1</sup>H NMR (500 MHz, CDCl<sub>3</sub>) δ 8.30 (d, *J* = 9.0 Hz, 2H), 7.94 (d, *J* = 9.0 Hz, 2H), 6.65 (br s, 1H), 5.13 (m, 1H), 4.19 (m, 2H), 3.49 (m, 1H), 2.19 (s, 3H), 1.79-1.70 (m, 2H), 1.42-1.33 (m, 2H), 0.95 (t, *J* = 7.5 Hz, 3H)

<sup>13</sup>C NMR (125 MHz, CDCl<sub>3</sub>) δ 170.81, 165.26, 149.73, 139.60, 128.20, 123.93, 73.53, 61.47, 42.00, 33.34, 20.95, 18.34, 13.77

HRMS analysis (ESI): Calculated for [M-H]<sup>-</sup>: C<sub>15</sub>H<sub>18</sub>ClN<sub>2</sub>O<sub>5</sub>: 341.0904; Found: 341.0903

Resolution of enantiomers: DAICEL Chiralcel<sup>®</sup> AD-H column, 10% IPA-Hexanes, 1.0 mL/min, 254 nm, RT1 (major) = 12.95 min, RT2 (minor) = 13.9 min.

$[\alpha]_D^{20} = +14.0$  (c 0.15, CHCl<sub>3</sub>, *er* = 93:7)

**s-2h-OH-NO<sub>2</sub>**: *N*-((2*R*,3*R*)-2-chloro-3-hydroxypentyl)-4-nitrobenzamide

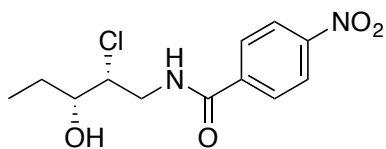

R<sub>f</sub>: 0.20 (30% EtOAc in hexanes, UV)

<sup>1</sup>H NMR (500 MHz, CD<sub>3</sub>CN) δ 8.29 (d, *J* = 9.0 Hz, 2H), 7.99 (d, *J* = 9.0 Hz, 2H), 7.60 (br s, 1H), 4.17-4.14 (dt, *J* = 6.5, 1.5 Hz, 1H), 3.90-3.85 (m, 1H), 3.70-3.65 (m, 1H), 3.61-3.55 (m, 1H), 3.42 (d, *J* = 6.5 Hz, 1H), 1.66-1.54 (m, 2H), 0.93 (t, *J* = 8.0 Hz, 3H)

<sup>13</sup>C NMR (125 MHz, CD<sub>3</sub>CN) δ 166.38, 150.10, 140.12, 128.84, 124.03, 72.10, 64.63, 43.77, 27.37, 9.87

HRMS analysis (ESI): Calculated for [M-H]<sup>-</sup>: C<sub>12</sub>H<sub>14</sub>ClN<sub>2</sub>O<sub>4</sub>: 285.0642; Found: 285.0645

Resolution of enantiomers: DAICEL Chiralcel<sup>®</sup> IA column, 15% IPA-Hexanes, 1.0 mL/min, 254 nm, RT1 (minor) = 13.7 min, RT2 (major) = 15.2 min.

[α]<sub>D</sub><sup>20</sup> = +6.0 (c 0.45, CHCl<sub>3</sub>, *er* = 99:1)

Absolute stereochemistry was determined by single crystal X-ray diffraction (XRD). Crystals for XRD were obtained by crystallization from CH<sub>2</sub>Cl<sub>2</sub> layered with hexanes in a silicone-coated vial.

**2k-OAc-NO<sub>2</sub>**: ((*R*)-3-chloro-2-methyl-4-(4-nitrobenzamido)butan-2-yl acetate

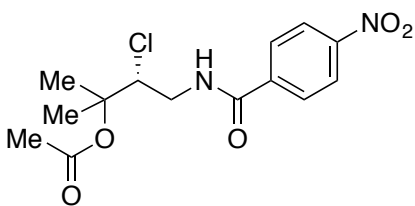

R<sub>f</sub>: 0.20 (30% EtOAc in hexanes, UV)

<sup>1</sup>H NMR (500 MHz, CDCl<sub>3</sub>) δ 8.30 (d, *J* = 9.0 Hz, 2H), 7.93 (d, *J* = 8.5 Hz, 2H), 6.54 (br s, 1H), 4.60-4.58 (dd, *J* = 10.0, 2.5 Hz, 1H), 4.31-4.26 (m, 1H), 3.39-3.33 (m, 1H), 2.03 (s, 3H), 1.62 (s, 3H), 1.60 (s, 3H)

<sup>13</sup>C NMR (125 MHz, CDCl<sub>3</sub>) δ 170.04, 165.45, 149.80, 139.57, 128.19, 123.93, 82.13, 66.63, 42.44, 23.62, 22.78, 22.17

HRMS analysis (ESI): Calculated for  $[M+H]^+$ :  $C_{14}H_{17}ClN_2O_5$ : 329.0904; Found: 304.0906

Resolution of enantiomers: DAICEL Chiralcel<sup>®</sup> AD-H column, 10% IPA-Hexanes, 1.0 mL/min, 254 nm, RT1 (major) = 22.1 min, RT2 (minor) = 24.4 min.

$[\alpha]_D^{20} = +39.2$  (c 0.7,  $CHCl_3$ ,  $er = 98:2$ )

*s*-**2c'**-OMe-NO<sub>2</sub>: *N*-((2*R*,3*R*)-2-bromo-3-methoxyhexyl)-4-nitrobenzamide

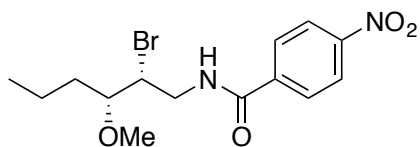

$R_f$ : 0.20 (30% EtOAc in hexanes, UV)

<sup>1</sup>H NMR (500 MHz,  $CDCl_3$ )  $\delta$  8.30 (d,  $J = 9.0$  Hz, 2H), 7.94 (d,  $J = 8.5$  Hz, 2H), 6.84 (br s, 1H), 4.38-4.35 (m, 1H), 4.19-4.12 (m, 1H), 3.73-3.68 (m, 1H), 3.39-3.36 (m, 1H), 1.79-1.73 (m, 2H), 1.45-1.39 (m, 2H), 0.98 (t,  $J = 8.0$  Hz, 3H)

<sup>13</sup>C NMR (125 MHz,  $CDCl_3$ )  $\delta$  165.33, 149.70, 139.70, 128.14, 123.92, 82.75, 58.12, 54.75, 44.23, 32.99, 18.90, 14.02

HRMS analysis (ESI): Calculated for  $[M+H]^+$ :  $C_{14}H_{29}BrN_2O_4$ : 359.0606; Found: 359.0604

Resolution of enantiomers: DAICEL Chiralcel<sup>®</sup> IA column, 10% IPA-Hexanes, 1.0 mL/min, 254 nm, RT1 (major) = 11.9 min, RT2 (minor) = 12.6 min.

$[\alpha]_D^{20} = +24.4$  (c 0.9,  $CHCl_3$ ,  $er = 99:1$ )

Absolute stereochemistry was determined by single crystal X-ray diffraction (XRD). Crystals for XRD were obtained by crystallization from  $CH_2Cl_2$  layered with hexanes in a silicone-coated vial.

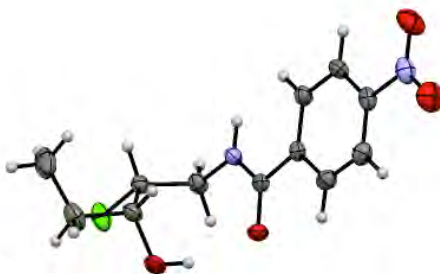

*s*-**2c'**-OH-NO<sub>2</sub>: *N*-((2*R*,3*R*)-2-bromo-3-hydroxyhexyl)-4-nitrobenzamide

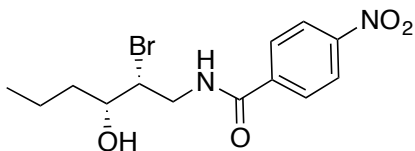

R<sub>f</sub>: 0.15 (30% EtOAc in hexanes, UV) 62 % yield

<sup>1</sup>H NMR (500 MHz, CDCl<sub>3</sub>) δ 8.29 (d, *J* = 9.0 Hz, 2H), 7.94 (d, *J* = 9.0 Hz, 2H), 6.89 (br s, 1H), 4.30-4.27 (m, 1H), 4.22-4.16 (m, 1H), 3.75-3.70 (m, 1H), 3.65 -3.62 (m, 4H), 2.17 (d, *J* = 8 Hz), 1.70-1.63 (m, 1H), 1.58-1.35 (m, 3H), 0.95 (t, *J* = 7.0 Hz, 3H)

<sup>13</sup>C NMR (125 MHz, CDCl<sub>3</sub>) δ 165.82, 149.78, 139.39, 128.21, 123.94, 71.79, 60.17, 45.04, 38.31, 18.73, 13.88

HRMS analysis (ESI): Calculated for [M+H]<sup>+</sup>: C<sub>13</sub>H<sub>18</sub>BrN<sub>2</sub>O<sub>4</sub>: 345.0450; Found: 345.0434

Resolution of enantiomers: DAICEL Chiralcel<sup>®</sup> Ia column, 10% IPA-Hexanes, 1.0 mL/min, 254 nm, RT1 (major) = 22.9 min, RT2 (minor) = 24.7 min.

[α]<sub>D</sub><sup>20</sup> = +11.6 (c = 0.5, CHCl<sub>3</sub>, *er* = 99.5:0.5)

*a*-**2c'**-OH-NO<sub>2</sub>: *N*-((2*R*,3*S*)-2-bromo-3-hydroxyhexyl)-4-nitrobenzamide

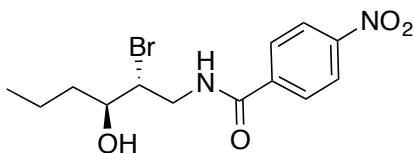

R<sub>f</sub>: 0.20 (30% EtOAc in hexanes, UV) 51% yield

<sup>1</sup>H NMR (500 MHz, CDCl<sub>3</sub>) δ 8.32 (d, *J* = 9.0 Hz, 2H), 7.97 (d, *J* = 9.0 Hz, 2H), 6.89 (br s, 1H), 4.39-4.32 (ddd, *J* = 15.5, 7.5, 4.0 Hz, 1H), 4.14 (d, *J* = 4.0 Hz 1H), 4.07-4.04 (m, 1H), 3.73 -3.68 (ddd, *J* = 15.0, 5.5, 3.5 Hz, 1H), 3.66-3.63 (m, 1H), 1.82-1.77 (m, 1H), 1.61-1.49 (m, 2H), 1.41-1.35 (m, 1H), 0.93 (t, *J* = 7.0 Hz, 3H)

<sup>13</sup>C NMR (125 MHz, CDCl<sub>3</sub>) δ 166.88, 149.94, 138.89, 128.34, 124.01, 72.00, 58.49, 42.87, 35.90, 18.94, 13.94

HRMS analysis (ESI): Calculated for [M+H]<sup>+</sup>: C<sub>13</sub>H<sub>18</sub>BrN<sub>2</sub>O<sub>4</sub>: 345.0450; Found: 345.0439

Resolution of enantiomers: DAICEL Chiralcel<sup>®</sup> OD-H column, 10% IPA-Hexanes, 1.0 mL/min, 254 nm, RT1 (minor) = 24.5 min, RT2 (major) = 29.7 min.

$[\alpha]_D^{20} = -15.6$  (c = 0.6, CHCl<sub>3</sub>, *er* = 85.0:15.0)

**2k'-OMe-NO<sub>2</sub>**: (*S*)-*N*-(2-bromo-3-methoxy-3-methylbutyl)-4-nitrobenzamide

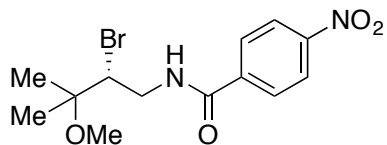

R<sub>f</sub>: 0.25 (30% EtOAc in hexanes, UV) 62% yield

<sup>1</sup>H NMR (500 MHz, CDCl<sub>3</sub>) δ 8.33 (d, *J* = 9.0 Hz, 2H), 7.97 (d, *J* = 9.0 Hz, 2H), 6.99 (br s, 1H), 4.31-4.23 (m, 2H), 3.65-3.60 (m, 1H), 3.33 (s, 3H), 1.42 (d, *J* = 8.5 Hz, 6H)

<sup>13</sup>C NMR (125 MHz, CDCl<sub>3</sub>) δ 165.22, 149.66, 139.86, 128.12, 123.91, 77.06, 61.19, 50.05, 43.45, 23.41, 22.42

HRMS analysis (ESI): Calculated for [M+H]<sup>+</sup>: C<sub>13</sub>H<sub>18</sub>ClN<sub>2</sub>O<sub>4</sub>: 345.0450; Found: 345.0441

Resolution of enantiomers: DAICEL Chiralcel<sup>®</sup> OJ-H column, 10% IPA-Hexanes, 1.0 mL/min, 254 nm, RT1 (minor) = 28.8 min, RT2 (major) = 33.9 min.

$[\alpha]_D^{20} = +23.8$  (c = 0.7, CHCl<sub>3</sub>, *er* = 99.5:0.5)

*epi*-**2k'-OMe-NO<sub>2</sub>**: (*S*)-*N*-(2-bromo-3-methoxy-3-methylbutyl)-4-nitrobenzamide

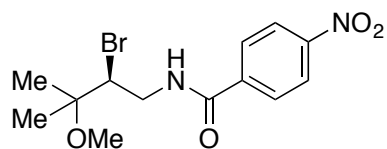

R<sub>f</sub>: 0.25 (30% EtOAc in hexanes, UV) 59% yield with (DHQ)<sub>2</sub>PHAlI

<sup>1</sup>H NMR (500 MHz, CDCl<sub>3</sub>) δ 8.33 (d, *J* = 9.0 Hz, 2H), 7.97 (d, *J* = 9.0 Hz, 2H), 6.99 (br s, 1H), 4.31-4.23 (m, 2H), 3.65-3.60 (m, 1H), 3.33 (s, 3H), 1.42 (d, *J* = 8.5 Hz, 6H)

<sup>13</sup>C NMR (125 MHz, CDCl<sub>3</sub>) δ 165.22, 149.66, 139.86, 128.12, 123.91, 77.06, 61.19, 50.05, 43.45, 23.41, 22.42

HRMS analysis (ESI): Calculated for [M+H]<sup>+</sup>: C<sub>13</sub>H<sub>18</sub>ClN<sub>2</sub>O<sub>4</sub>: 345.0450; Found: 345.0439

Resolution of enantiomers: DAICEL Chiralcel<sup>®</sup> OJ-H column, 10% IPA-Hexanes, 1.0 mL/min, 254 nm, RT1 (major) = 27.8 min, RT2 (minor) = 32.4 min.

$[\alpha]_D^{20} = -33.8$  ( $c = 1.0$ ,  $\text{CHCl}_3$ ,  $er = 99.5:0.5$ )

#### V.A. Analytical data for byproduct

**2c-NHAc-NO<sub>2</sub>**: *N*-(3-acetamido-2-chlorohexyl)-4-nitrobenzamide

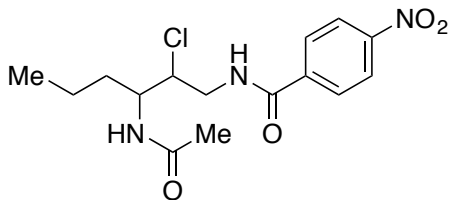

**Note: Relative and absolute stereochemistry was not established.**

R<sub>f</sub>: 0.10 (20% EtOAc in hexanes, UV)

<sup>1</sup>H NMR (500 MHz, CDCl<sub>3</sub>) δ 8.30 (d,  $J = 9.0$  Hz, 2H), 8.25 (br s, 1H), 8.07 (d,  $J = 9.0$  Hz, 2H), 5.58 (d,  $J = 9.5$  Hz, 1H), 4.34-4.26 (m, 2H), 4.13-4.09 (m, 1H), 2.93-2.87 (m, 1H), 2.85 (s, 3H), 1.67-1.53 (m, 2H), 1.37-1.32 (m, 2H), 0.88 (t,  $J = 7.5$  Hz, 3H)

<sup>13</sup>C NMR (125 MHz, CDCl<sub>3</sub>) δ 172.09, 164.76, 149.71, 139.19, 128.35, 123.85, 61.12, 49.31, 42.35, 34.75, 23.29, 19.24, 13.65

HRMS analysis (ESI): Calculated for  $[\text{M}+\text{H}]^+$ : C<sub>15</sub>H<sub>21</sub>ClN<sub>3</sub>O<sub>4</sub>: 342.1221; Found: 342.1229



## VI. Synthesis of unsaturated amide substrates for chlorofunctionalization<sup>2-3</sup>

### General procedure for synthesis of substrates

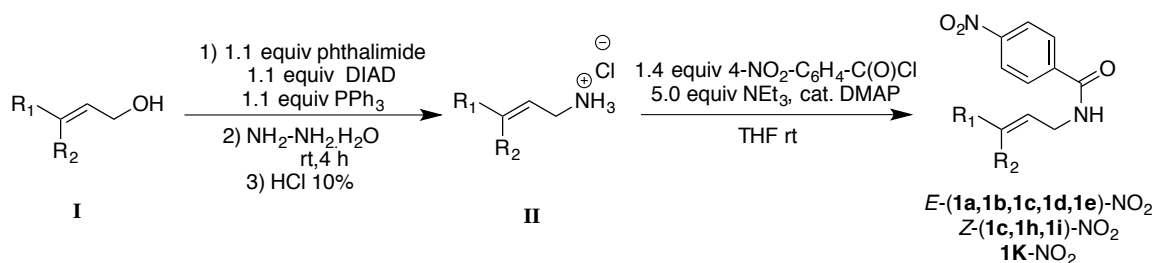

Allyl alcohols **I** were synthesized from the corresponding aldehydes or ketone by a Horner-Wadsworth-Emmons (HWE) olefination reaction followed by DIBAL reduction of the resulting ester.

Allyl alcohols **I** (1.0 equiv), phthalimide (1.1 equiv) and  $PPh_3$  (1.1 equiv) were added to the reaction vessel and dissolved in THF (5 mL/mmol). The flask was immersed in an ice bath and DIAD (1.1 equiv) was added dropwise. After TLC analysis revealed the complete consumption of starting material (~30 min), 3 equivalents of hydrazine hydrate were added to the reaction vessel and the resulting suspension was stirred overnight at room temperature. The reaction was diluted with water, concentrated HCl (3 mL) was added, and the resulting suspension was stirred for further 30 min at ambient temperature. The precipitated solids were filtered and the filter cake was washed with 10% aq. HCl ( $2 \times 2$  mL). The combined filtrates were washed with ether ( $3 \times 5$  mL) and the aqueous phase was concentrated under reduced pressure, giving the amine salts **II**, which were used in the next reaction without any purification.

A solution of crude ammonium chloride salt **II** from the previous step (1 equiv), triethylamine (5 equiv) and catalytic amount of DMAP in THF (20 mL) were cooled in an ice bath. To this suspension was added *p*-nitrobenzoyl chloride (1.5 equiv). After the addition was completed, the reaction was warmed to room temperature. After 3 h, the reaction was quenched with methanol (1.0 mL) and then diluted with an equal amount of water, concentrated under reduced pressure, and extracted with DCM ( $3 \times 25$  mL). The combined organic layer was washed with brine ( $1 \times 20$  mL), dried over anhyd.  $Na_2SO_4$  and concentrated under reduced pressure in the presence of silica gel. Column

chromatography (EtOAc-Hexanes gradient elution) gave the desired products (*E*-(**1a**,**1b**,**1c**,**1d**,**1e**)-NO<sub>2</sub>, *Z*-(**1c**,**1h**,**1i**)-NO<sub>2</sub>, **1k**-NO<sub>2</sub>).

*E*-**1b**-NO<sub>2</sub>: *N*-cinnamyl-4-nitrobenzamide

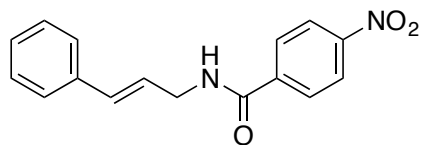

R<sub>f</sub>: 0.31 (30% EtOAc in hexanes, UV)

<sup>1</sup>H NMR (500 MHz, CDCl<sub>3</sub>) δ 8.28 (d, *J* = 8.5 Hz, 2H), 7.95 (d, *J* = 8.5 Hz, 2H), 7.34-7.25 (m, 5H), 7.23 (d, *J* = 16.0 Hz, 1H), 6.62 (br s, 1H), 6.59-6.23 (m, 1H), 4.25 (t, *J* = 6.5 Hz, 2H)

<sup>13</sup>C NMR (125 MHz, CDCl<sub>3</sub>) δ 165.25, 149.57, 139.90, 136.11, 133.26, 128.65, 128.14, 128.02, 126.39, 124.42, 123.83, 42.44

HRMS analysis (ESI): Calculated for [M+H]<sup>+</sup>: C<sub>16</sub>H<sub>15</sub>N<sub>2</sub>O<sub>3</sub>: 283.1083; Found: 283.1085

*E*-**1d**-NO<sub>2</sub>: (*E*)-*N*-(3-(4-fluorophenyl)allyl)-4-nitrobenzamide

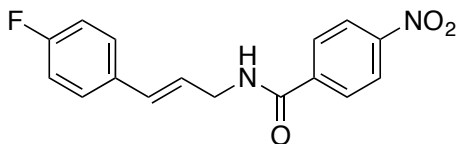

R<sub>f</sub>: 0.30 (30% EtOAc in hexanes, UV)

<sup>1</sup>H NMR (500 MHz, CDCl<sub>3</sub>) δ 8.32 (d, *J* = 8.5 Hz, 2H), 7.98 (d, *J* = 8.5 Hz, 2H), 7.34-7.31 (m, 2H), 7.01-6.97 (m, 1H), 7.58 (d, *J* = 15.5 Hz, 1H), 6.28 (br s, 1H), 6.21-6.15 (m, 1H), 4.25 (t, *J* = 6.0 Hz, 2H)

<sup>13</sup>C NMR (125 MHz, CDCl<sub>3</sub>) δ 165.23, 149.69, 139.91, 132.18, 128.14, 128.02 (d, *J*<sub>CF</sub> = 30 Hz), 124.26 (d, *J*<sub>CF</sub> = 7.5 Hz), 123.89, 115.70, 115.53, 42.39

HRMS analysis (ESI): Calculated for [M+H]<sup>+</sup>: C<sub>16</sub>H<sub>14</sub>FN<sub>2</sub>O<sub>3</sub>: 301.0988; Found: 301.0991

*E*-**1c**-NO<sub>2</sub>: (*E*)-*N*-(hex-2-en-1-yl)-4-nitrobenzamide

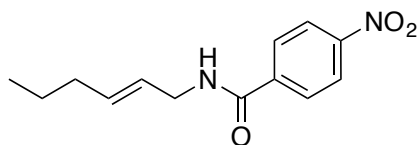

R<sub>f</sub>: 0.30 (30% EtOAc in hexanes, UV)

<sup>1</sup>H NMR (500 MHz, CDCl<sub>3</sub>) δ 8.27 (d, *J* = 9.0 Hz, 2H), 7.92 (d, *J* = 9.0 Hz, 2H), 6.14 (br s, 1H), 5.72-5.68 (m, 1H) 5.55-5.51 (m, 1H), 4.02 (t, *J* = 6.0 Hz, 2H), 2.03-1.995 (m, 2H), 1.41-1.37 (m, 2H), 0.89 (t, *J* = 7.0 Hz, 3H)

<sup>13</sup>C NMR (125 MHz, CDCl<sub>3</sub>) δ 165.09, 149.58, 140.21, 134.96, 128.08, 124.90, 123.81, 42.35, 34.30, 22.19, 13.65

HRMS analysis (ESI): Calculated for [M+H]<sup>+</sup>: C<sub>13</sub>H<sub>17</sub>N<sub>2</sub>O<sub>3</sub>: 249.1239; Found: 249.1243

*E*-1a-NO<sub>2</sub>: (*E*)-*N*-(3-cyclohexylallyl)-4-nitrobenzamide

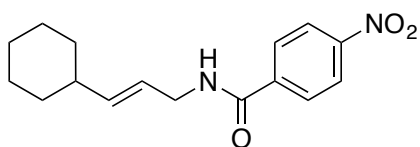

R<sub>f</sub>: 0.44 (30% EtOAc in hexanes, UV)

<sup>1</sup>H NMR (500 MHz, CDCl<sub>3</sub>) δ 8.27 (d, *J* = 9.0 Hz, 2H), 7.92 (d, *J* = 9.0 Hz, 2H), 6.12 (br s, 1H), 5.67-5.50 (m, 1H), 5.48-5.44 (m, 1H), 4.02 (t, *J* = 6.0 Hz, 2H), 1.94 (m, 1H), 1.71-1.54 (m, 5H), 1.28-1.041 (m, 5H)

<sup>13</sup>C NMR (125 MHz, CDCl<sub>3</sub>) δ 165.07, 140.86, 140.22, 128.09, 123.80, 122.26, 116.59, 42.47, 40.36, 32.71, 26.06, 25.93

HRMS analysis (ESI): Calculated for [M+H]<sup>+</sup>: C<sub>16</sub>H<sub>21</sub>N<sub>2</sub>O<sub>3</sub>: 289.1552; Found: 289.1541

*E*-1e-NO<sub>2</sub>: (*E*)-*N*-(4-(benzyloxy)but-2-en-1-yl)-4-nitrobenzamide

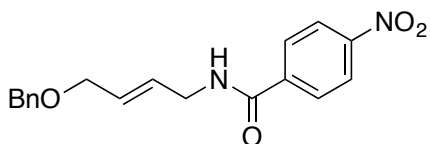

R<sub>f</sub>: 0.20 (30% EtOAc in hexanes, UV)

<sup>1</sup>H NMR (500 MHz, CDCl<sub>3</sub>) δ 8.26 (d, *J* = 8.0 Hz, 2H), 7.91 (d, *J* = 8.0 Hz, 2H), 7.32-7.26 (m, 4H), 6.27 (br s, 1H), 5.83 (m, 2H), 4.51 (s, 2H), 4.10-4.01(m, 4H)

<sup>13</sup>C NMR (125 MHz, CDCl<sub>3</sub>) δ 165.18, 149.62, 139.91, 137.96, 129.87, 128.42, 128.11, 127.99, 127.76, 127.75, 123.82, 72.66, 69.91, 41.67

HRMS analysis (ESI): Calculated for [M+H]<sup>+</sup>: C<sub>18</sub>H<sub>19</sub>N<sub>2</sub>O<sub>4</sub>: 327.1345; Found: 327.1336

**Z-1c-NO<sub>2</sub>**: (Z)-N-(hex-2-en-1-yl)-4-nitrobenzamide

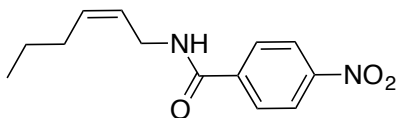

R<sub>f</sub>: 0.33 (30% EtOAc in hexanes, UV)

<sup>1</sup>H NMR (500 MHz, CDCl<sub>3</sub>) δ 8.25 (d, *J* = 9.0 Hz, 2H), 7.92 (d, *J* = 9.0 Hz, 2H), 6.17 (br s, 1H), 5.63-5.60 (m, 1H), 5.51-5.46 (m, 1H), 4.01 (t, *J* = 6.0 Hz, 2H), 2.12-2.077 (m, 2H), 1.42-1.39 (m, 2H), 0.90 (t, *J* = 7.0 Hz, 3H)

<sup>13</sup>C NMR (125 MHz, CDCl<sub>3</sub>) δ 158.14, 142.24, 133.03, 127.60, 120.97, 117.17, 116.67, 30.34, 22.31, 15.46, 6.57

HRMS analysis (ESI): Calculated for [M+H]<sup>+</sup>: C<sub>13</sub>H<sub>17</sub>N<sub>2</sub>O<sub>3</sub>: 249.1239; Found: 249.1244

**Z-1h-NO<sub>2</sub>**: (Z)-4-nitro-N-(pent-2-en-1-yl)benzamide

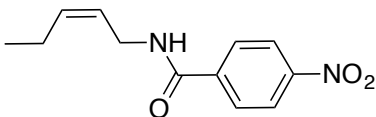

R<sub>f</sub>: 0.35 (30% EtOAc in hexanes, UV)

<sup>1</sup>H NMR (500 MHz, CDCl<sub>3</sub>) δ 8.28 (d, *J* = 9.0 Hz, 2H), 7.92 (d, *J* = 9.0 Hz, 2H), 6.08 (br s, 1H), 5.66-5.62 (m, 1H), 5.47-5.43 (m, 1H), 4.12 (t, 6.0 Hz, 2H), 2.17-2.19 (m, 2H), 1.02 (t, *J* = 8.0 Hz, 3H)

<sup>13</sup>C NMR (125 MHz, CDCl<sub>3</sub>) δ 165.27, 149.50, 140.10, 136.47, 128.09, 123.79, 123.49, 37.35, 20.76, 14.13

HRMS analysis (ESI): Calculated for [M+H]<sup>+</sup>: C<sub>12</sub>H<sub>25</sub>N<sub>2</sub>O<sub>3</sub>: 235.1083; Found: 235.1079

**Z-1i-NO<sub>2</sub>**: (Z)-4-nitro-N-(non-2-en-1-yl)benzamide

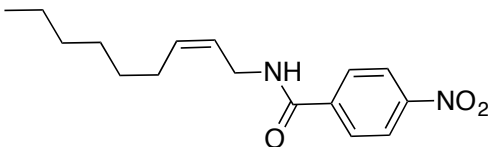

R<sub>f</sub>: 0.27 (30% EtOAc in hexanes, UV)

<sup>1</sup>H NMR (500 MHz, CDCl<sub>3</sub>) δ 8.27 (d, *J* = 9.0 Hz, 2H), 7.92 (d, *J* = 9.0 Hz, 2H), 6.08 (br s, 1H), 5.65-6.61 (m, 1H), 5.50-5.47 (m, 1H), 4.11 (t, *J* = 5.5 Hz, 2H), 2.14 (dd, *J* = 14.0,

7.0 Hz, 2H), 3.46-3.43 (m, 1H), 1.72-1.68 (m, 2H), 1.39-1.25 (m, 8H,) 0.90 (t,  $J = 7.0$  Hz, 3H)

$^{13}\text{C}$  NMR (125 MHz,  $\text{CDCl}_3$ )  $\delta$  165.25, 149.54, 140.11, 135.13, 128.07, 123.99, 123.88, 73.45, 31.67, 29.41, 28.92, 27.46, 22.60, 14.07

HRMS analysis (ESI): Calculated for  $[\text{M}+\text{H}]^+$ :  $\text{C}_{16}\text{H}_{23}\text{N}_2\text{O}_3$ : 291.1709; Found: 291.1708

**1k-NO<sub>2</sub>**: *N*-(3-methylbut-2-en-1-yl)-4-nitrobenzamide

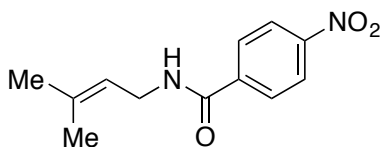

$R_f$ : 0.30 (30% EtOAc in hexanes, UV)

$^1\text{H}$  NMR (500 MHz,  $\text{CDCl}_3$ )  $\delta$  8.26 (d,  $J = 7.5$  Hz, 2H), 7.91 (d,  $J = 7.5$  Hz, 2H), 6.08 (br s, 1H), 5.28 (t,  $J = 5.5$  Hz, 1H), 4.03 (t,  $J = 5.5$  Hz, 2H), 1.74 (s, 3H), 1.71 (s, 3H)

$^{13}\text{C}$  NMR (125 MHz,  $\text{CDCl}_3$ )  $\delta$  165.95, 149.53, 140.24, 137.71, 128.73, 123.33, 119.29, 38.38, 25.67, 17.96

HRMS analysis (ESI): Calculated for  $[\text{M}+\text{H}]^+$ :  $\text{C}_{12}\text{H}_{15}\text{ClN}_2\text{O}_3$ : 235.1083; Found: 235.1085

### General procedure for synthesis of aromatic *Z*-allyl amides

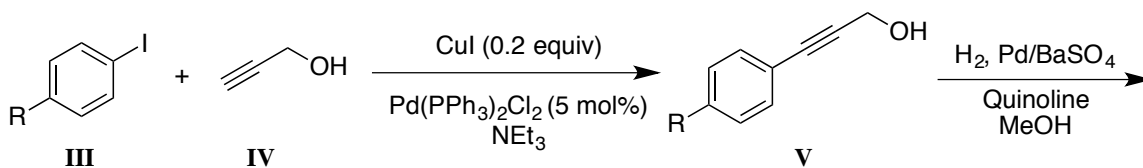

$R = \text{H, Me, OCH}_3$

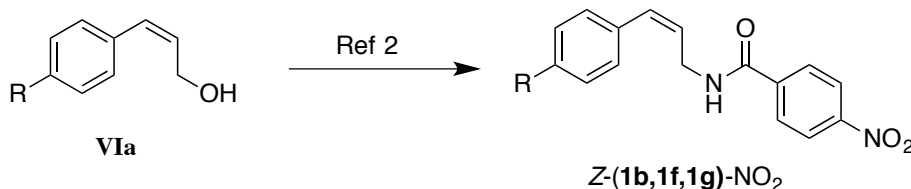

Iodo benzene **III** (1.0 equiv) and propargyl alcohol was dissolved in triethylamine (10 mL/mmol) at room temperature after which CuI (0.2 equiv) and Pd(PPh<sub>3</sub>)Cl<sub>2</sub> (5 mol%) were added to reaction vessel. After TLC analysis revealed consumption of starting

material, the reaction was diluted with water, concentrated under reduced pressure, and extracted with DCM (3 × 25 mL). The combined organic layer was washed with brine (1 × 20 mL), dried over anhyd. Na<sub>2</sub>SO<sub>4</sub> and concentrated under reduced pressure in the presence of silica gel. Column chromatography (20% EtOAc-Hexanes gradient elution) gave the desired products **V**. (70-85 % yield for different substrates)

3-Phenylprop-2-yn-1-ol **V** (1.0 equiv), palladium on barium sulfate (10 wt%) and quinoline were dissolved in methanol (10 mL/mmol). The reaction vessel was purged with hydrogen gas and then stirred under balloon pressure of H<sub>2</sub>. When GC analysis revealed complete consumption of starting material, the catalyst was filtered and the filtrate was concentrated. Column chromatography (EtOAc-Hexanes gradient elution) gave the desired products (**VIa**).

Allyl amides *Z*-(**1b,1f,1g**)-NO<sub>2</sub> were synthesized as reported previously.<sup>1</sup>

**Z-1b-NO<sub>2</sub>**: (*Z*)-4-nitro-*N*-(3-phenylallyl)benzamide

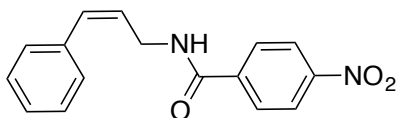

R<sub>f</sub>: 0.31 (30% EtOAc in hexanes, UV)

<sup>1</sup>H NMR (500 MHz, CDCl<sub>3</sub>) δ 8.25 (d, *J* = 9.0 Hz, 2H), 7.86 (d, *J* = 9.0 Hz, 2H), 7.37-7.26 (m, 5H), 6.41 (d, *J* = 11.5 Hz, 1H), 6.22 (br s, 1H), 5.78-5.73 (m, 1H) 4.39-4.36 (m, 2H)

<sup>13</sup>C NMR (125 MHz, CDCl<sub>3</sub>) δ 165.25, 149.62, 139.94, 136.09, 123.62, 128.71, 128.47, 128.08, 127.55, 126.85, 123.81, 38.60

HRMS analysis (ESI): Calculated for [M+H]<sup>+</sup>: C<sub>16</sub>H<sub>15</sub>N<sub>2</sub>O<sub>3</sub>: 283.1083; Found: 283.1091

**Z-1f-NO<sub>2</sub>**: (*Z*)-4-nitro-*N*-(3-(*p*-tolyl)allyl)benzamide

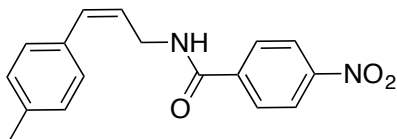

R<sub>f</sub>: 0.32 (30% EtOAc in hexanes, UV)

$^1\text{H}$  NMR (500 MHz,  $\text{CDCl}_3$ )  $\delta$  8.26 (d,  $J = 9$  Hz, 2H), 7.87 (d,  $J = 9$  Hz, 2H), 7.17-7.13 (m, 4H), 6.64 (d,  $J = 12.0$  Hz, 1H), 6.17 (br s, 1H), 5.73-5.68 (m, 1H) 4.39-4.36 (m, 1H), 2.34 (s, 3H)

$^{13}\text{C}$  NMR (125 MHz,  $\text{CDCl}_3$ )  $\delta$  165.29, 149.47, 139.89, 137.39, 133.13, 132.31, 129.10, 128.62, 128.09, 126.12, 123.17, 38.66, 21.15

HRMS analysis (ESI): Calculated for  $[\text{M}+\text{H}]^+$ :  $\text{C}_{11}\text{H}_{17}\text{N}_2\text{O}_3$ : 297.1239; Found: 297.1234

**Z-1g-NO<sub>2</sub>**: (Z)-N-(3-(4-methoxyphenyl)allyl)-4-nitrobenzamide

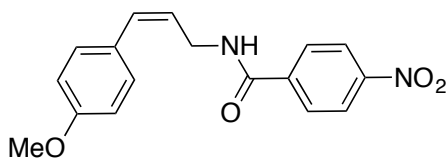

$R_f$ : 0.25 (30% EtOAc in hexanes, UV)

$^1\text{H}$  NMR (500 MHz,  $\text{CDCl}_3$ )  $\delta$  8.27 (d,  $J = 9.0$  Hz, 2H), 7.89 (d,  $J = 9.0$  Hz, 2H), 7.20 (d,  $J = 8.0$  Hz, 2H), 6.90 (d,  $J = 8.0$  Hz, 2H), 6.61 (d,  $J = 11.5$  Hz), 6.17 (br s, 1H), 5.68-5.63 (m, 1H), 4.39-4.36 (m, 2H), 3.80 (s, 3H)

$^{13}\text{C}$  NMR (125 MHz,  $\text{CDCl}_3$ )  $\delta$  165.29, 158.96, 149.54, 139.94, 132.08, 130.04, 128.59, 128.13, 125.10, 123.80, 113.85, 55.28, 38.68

HRMS analysis (ESI): Calculated for  $[\text{M}-\text{H}]^-$ :  $\text{C}_{17}\text{H}_{15}\text{N}_2\text{O}_4$ : 311.1032; Found: 311.1027

## General procedure Synthesis of substrates **Z-1e-NO<sub>2</sub>** – **Z-1j-NO<sub>2</sub>**

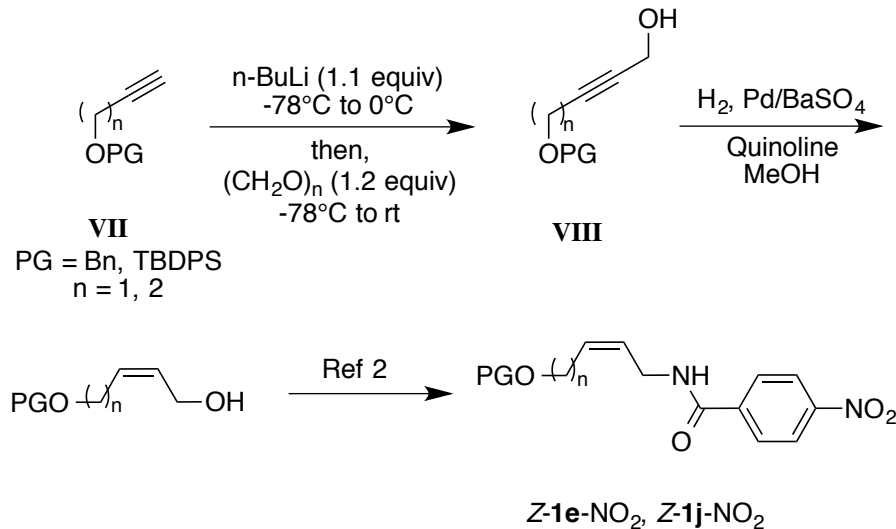

Alkyne **VII** (1.0 equiv) was dissolved in THF in a flamed dried round bottom flask. *n*-BuLi (1.1 equiv) was added to cooled solution at -78 °C. The reaction was then warmed to 0 °C. After 30 min paraformaldehyde (1.2 equiv) was added in a single portion at -78 °C and the reaction was warmed to room temperature. After 2 h, reaction was quenched with sat. aq. NH<sub>4</sub>Cl solution (15.0 mL). The mixture was diluted with water and concentrated under reduced pressure and then extracted with DCM (3 × 10 mL). The combined organic layer was washed with brine (1 × 10 mL), dried over anhyd. Na<sub>2</sub>SO<sub>4</sub>, and concentrated under reduced pressure in the presence of silica gel. Column chromatography (EtOAc-Hexanes gradient elution) gave the desired products **VIII**. The *Z* allylic alcohol was synthesized from alkynol **VIII** by a Lindlar reduction that was reported in page **S23**.

Allyl amides **Z-1e-NO<sub>2</sub>**, **Z-1j-NO<sub>2</sub>** were synthesized as reported previously.<sup>1</sup>

**Z-1e-NO<sub>2</sub>**: (*Z*)-*N*-(4-(benzyloxy)but-2-en-1-yl)-4-nitrobenzamide

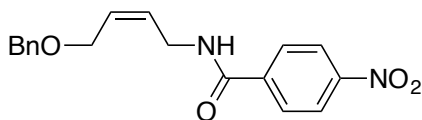

R<sub>f</sub>: 0.27 (30% EtOAc in hexanes, UV)



$^1\text{H}$  NMR (500 MHz,  $\text{CDCl}_3$ )  $\delta$  8.15 (d,  $J = 9.0$  Hz, 2H), 7.73 (d,  $J = 9.0$  Hz, 2H), 7.33-7.28 (m, 5H), 6.47 (br s, 1H), 5.92-5.80 (m, 2H), 4.53 (s, 2H), 4.17 (d,  $J = 16.0$  Hz, 2H), 4.11 (t, 2H)

$^{13}\text{C}$  NMR (125 MHz,  $\text{CDCl}_3$ )  $\delta$  164.96, 149.43, 139.82, 137.63, 130.36, 129.22, 128.60, 128.06, 128.04, 128.00, 123.71, 73.00, 65.85, 37.22

HRMS analysis (ESI): Calculated for  $[\text{M}+\text{H}]^+$ :  $\text{C}_{18}\text{H}_{19}\text{N}_2\text{O}_4$ : 327.1345; Found: 327.1350

**Z-1j-NO<sub>2</sub>**: (Z)-N-(5-((tert-butyl)dimethylsilyloxy)pent-2-en-1-yl)-4-nitrobenzamide

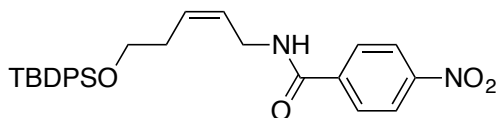

$R_f$ : 0.35 (30% EtOAc in hexanes, UV)

$^1\text{H}$  NMR (500 MHz,  $\text{CDCl}_3$ )  $\delta$  8.18 (d,  $J = 8.0$  Hz, 2H), 7.76 (d,  $J = 8.0$  Hz, 2H), 7.66-7.63 (m, 5H), 7.37-7.24 (m, 5H), 6.02 (br s, 1H), 5.70-5.67 (m, 1H) 5.62-5.60 (m, 1H) 4.06 (t,  $J = 6.5$  Hz, 2H), 3.74 (t,  $J = 6.5$  Hz, 2H), 2.40 (dt,  $J = 6.5$  Hz, 2H), 1.03 (s, 9H)

$^{13}\text{C}$  NMR (125 MHz,  $\text{CDCl}_3$ )  $\delta$  165.22, 149.47, 140.02, 135.53, 135.48, 133.75, 131.24, 129.72, 128.02, 127.70, 126.16, 123.80, 123.72, 63.21, 37.41, 30.85, 26.87, 26.77, 19.28

HRMS analysis (ESI): Calculated for  $[\text{M}+\text{H}]^+$ :  $\text{C}_{28}\text{H}_{33}\text{N}_2\text{O}_4\text{Si}$ : 489.2210; Found: 489.2214

## VII. Product distribution arising due to substrate-control and catalyst-control for the intermolecular chloroetherification reaction.

Reactions run in the absence of any catalyst gave a mixture of numerous products in the attempted intermolecular chloroetherification reaction of both *E*- and *Z*- allyl amides. In contrast, reactions run in the presence of (DHQD)<sub>2</sub>PHAL gave predominantly, the desired chloroether product. The numerous products seen in these reactions were meticulously isolated and characterized. The *Z*-**1c**-NO<sub>2</sub> gave 3 major products. As seen from the HPLC trace of the crude reaction mixture, along with the desired product *s*-**2c**-

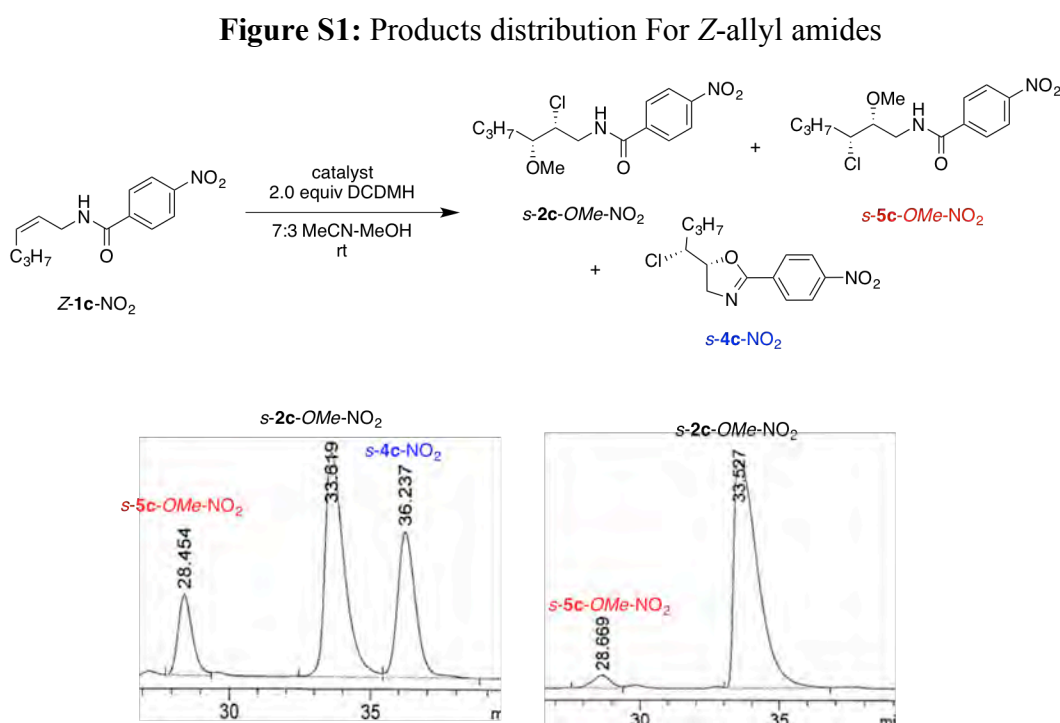

*OMe*-NO<sub>2</sub>, the constitutional isomer *s*-**5c**-OMe-NO<sub>2</sub> as well as the cyclized oxazoline product *s*-**4c**-NO<sub>2</sub> were seen. Under optimized reaction conditions that employed (DHQD)<sub>2</sub>PHAL, the major product was the chloroether *s*-**2c**-OMe-NO<sub>2</sub>. Small amount of the constitutional isomer *s*-**5c**-OMe-NO<sub>2</sub> was seen; no cyclized products were observed. A similar analysis was also performed with the *E*-**1c**-NO<sub>2</sub>. As seen from the scheme below, the non-catalyzed reaction gave 2 constitutional isomers for both the chloroether product as well as the cyclized product. Although all these compounds were seen in the (DHQD)<sub>2</sub>PHAL catalyzed reaction as well, the selectivity for the desired chloroether product was significantly higher.

**Figure S2:** Products distribution For *E*-allyl amides

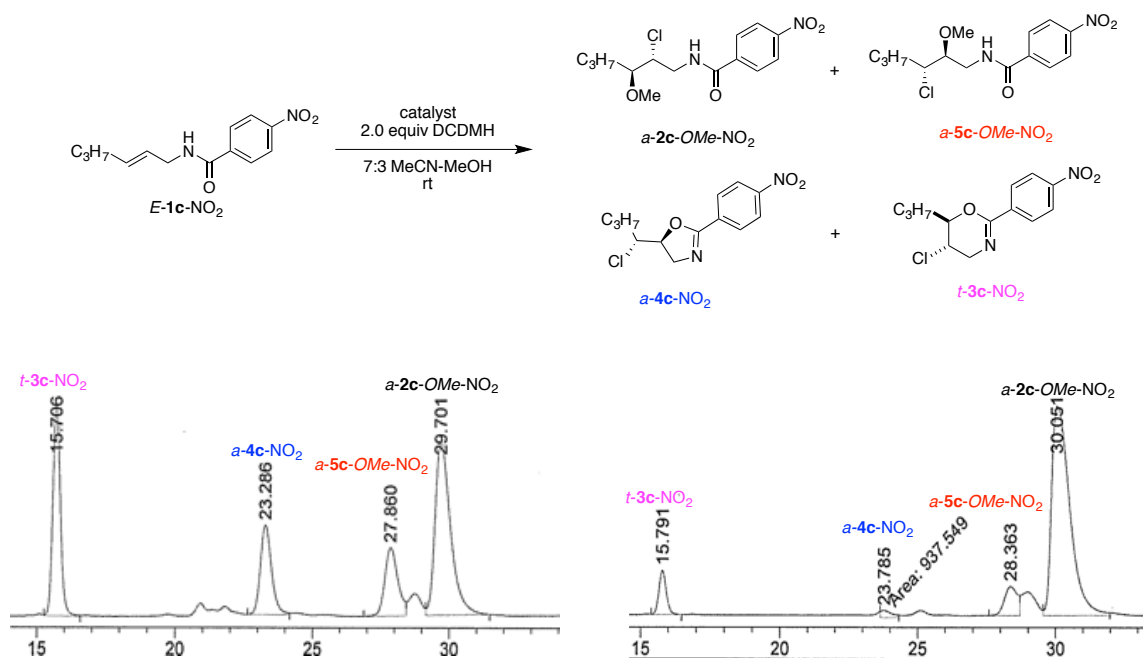

**VIIa. Analytical data for different products of chloroetherification reaction without catalyst**

*s*-**5c-OMe-NO<sub>2</sub>**: 3-chloro-2-methoxyhexyl)-4-nitrobenzamide

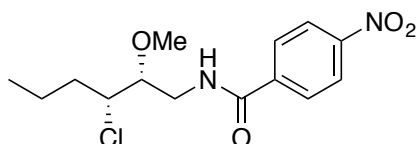

<sup>1</sup>H NMR (500 MHz, CDCl<sub>3</sub>) δ 8.29 (d, *J* = 9.0 Hz, 2H), 7.93 (d, *J* = 9.0 Hz, 2H), 6.52 (br s, 1H), 4.05-4.02 (m, 1H), 3.92-3.86 (m, 1H), 3.63-3.54 (m, 2H), 3.51 (s, 3H), 1.87-1.72 (m, 2H), 1.66-1.59 (m, 1H), 1.47-1.38 (m, 1H), 0.95 (t, *J* = 7.5 Hz, 3H)

<sup>13</sup>C NMR (125 MHz, CDCl<sub>3</sub>) δ 165.49, 149.73, 139.79, 128.11, 123.92, 81.53, 62.18, 59.22, 40.56, 35.49, 19.93, 13.45

*s*-**4c**-NO<sub>2</sub>: 1-chlorobutyl-2-(4-nitrophenyl)-4,5-dihydrooxazole

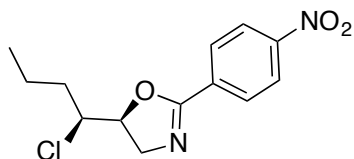

<sup>1</sup>H NMR (500 MHz, CDCl<sub>3</sub>) δ 8.27 (d, *J* = 8.5 Hz, 2H), 8.12 (d, *J* = 8.5 Hz, 2H), 4.93-4.89 (m, 1H), 4.22 (dd, *J* = 15.0, 10.0 Hz, 1H), 4.17 (dd, *J* = 15.0, 10.0 Hz, 1H), 3.99-3.97 (m, 1H), 1.85-1.71 (m, 2H), 1.69-1.63 (m, 1H), 1.51-1.45 (m, 1H), 0.97 (t, *J* = 7.5 Hz, 3H)

<sup>13</sup>C NMR (125 MHz, CDCl<sub>3</sub>) δ 162.22, 149.57, 132.98, 129.27, 123.59, 81.69, 62.92, 57.85, 35.51, 19.66, 13.45

HRMS analysis (ESI): Calculated for [M+H]<sup>+</sup>: C<sub>13</sub>H<sub>16</sub>N<sub>2</sub>O<sub>3</sub>Cl: 283.0849; Found: 283.0861

Relative stereochemistry was determined by single crystal X-ray diffraction (XRD). Crystals for XRD were obtained by crystallization from CH<sub>2</sub>Cl<sub>2</sub> layered with hexanes in a silicone-coated vial.

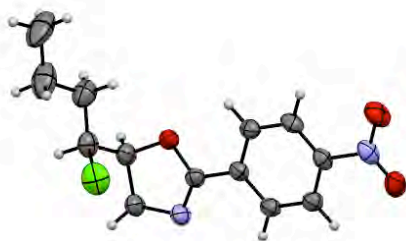

*a*-**5c**-OMe-NO<sub>2</sub>: 3-chloro-2-methoxyhexyl-4-nitrobenzamide

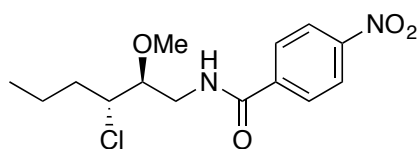

$^1\text{H}$  NMR (500 MHz,  $\text{CDCl}_3$ )  $\delta$  8.29 (d,  $J = 9.0$  Hz, 2H), 7.93 (d,  $J = 9.0$  Hz, 2H), 6.55 (br s, 1H), 4.11-4.07 (m, 1H), 3.99-3.95 (m, 1H), 3.56-3.51 (m, 1H), 3.50-3.47 (m, 4H), 1.84-1.79 (m, 1H), 1.69-1.63 (m, 1H), 1.48-1.41 (m, 2H), 0.97 (t,  $J = 7.5$  Hz, 3H)

$^{13}\text{C}$  NMR (125 MHz,  $\text{CDCl}_3$ )  $\delta$  165.46, 149.63, 139.86, 128.12, 123.89, 81.70, 61.21, 57.93, 39.79, 36.26, 19.96, 13.53

*a*-**4c**-NO<sub>2</sub>: chlorobutyl-2-(4-nitrophenyl)-4,5-dihydrooxazole

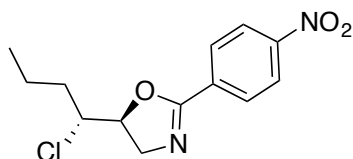

$^1\text{H}$  NMR (500 MHz,  $\text{CDCl}_3$ )  $\delta$  8.26 (d,  $J = 8.5$  Hz, 2H), 8.10 (d,  $J = 8.5$  Hz, 2H), 4.82-4.77 (m, 1H), 4.21 (dd,  $J = 16.0, 10.0$  Hz, 1H), 4.09-4.03 (m, 2H), 1.85-1.83 (m, 1H), 1.69-1.66 (m, 2H), 1.47-1.43 (m, 1H), 0.98 (t,  $J = 7.5$  Hz, 3H)

$^{13}\text{C}$  NMR (125 MHz,  $\text{CDCl}_3$ )  $\delta$  161.86, 149.54, 133.11, 129.19, 123.59, 82.03, 63.02, 57.96, 35.85, 19.28, 13.49

*t*-**3c**-NO<sub>2</sub>: 5-chloro-2-(4-nitrophenyl)-6-propyl-5,6-dihydro-4*H*-1,3-oxazine

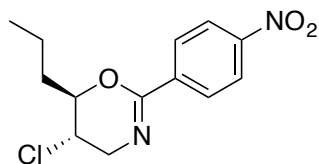

$^1\text{H}$  NMR (500 MHz,  $\text{CDCl}_3$ )  $\delta$  8.21 (d,  $J = 8.5$  Hz, 2H), 8.06 (d,  $J = 8.5$  Hz, 2H), 4.26 (dt,  $J = 8.5, 3.0$  Hz, 1H), 3.02-3.94 (m, 2H), 3.70 (dd,  $J = 16.5, 7.0$  Hz, 1H), 1.99-1.94 (m, 1H), 1.71-1.64 (m, 2H), 1.55-1.51 (m, 1H), 1.03 (t,  $J = 7.5$  Hz, 3H)

$^{13}\text{C}$  NMR (125 MHz,  $\text{CDCl}_3$ )  $\delta$  153.32, 149.22, 138.64, 128.19, 123.30, 78.85, 52.44, 50.48, 34.48, 18.02, 13.84

HRMS analysis (ESI): Calculated for  $[\text{M}+\text{H}]^+$ :  $\text{C}_{13}\text{H}_{16}\text{N}_2\text{O}_3\text{Cl}$ : 283.0849; Found: 283.0863

Relative stereochemistry was determined by single crystal X-ray diffraction (XRD). Crystals for XRD were obtained by crystallization from  $\text{CH}_2\text{Cl}_2$  layered with hexanes in a silicone-coated vial.

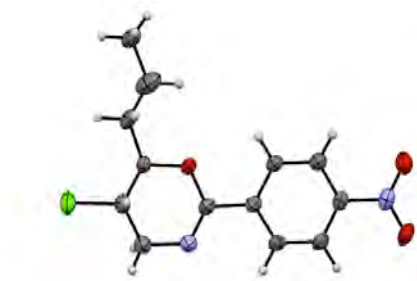

### VIII. Absolute stereochemistry of chloroetherification products derived from *E*-alkene:

Attention must be drawn to the fact that the Cl bearing stereocenter has the same chirality for products derived from either the *cis* or *trans*-alkene substrates. The absolute stereochemistry of *s*-**2h**-OH-NO<sub>2</sub> and *s*-**2c**-OMe-NO<sub>2</sub>, and the relative stereochemistry of *a*-**2c**-OH-NO<sub>2</sub> were established by single crystal X-ray diffraction. Since the absolute stereochemistry of *a*-**2c**-OH-NO<sub>2</sub> could not be determined from X-ray analysis, we resorted to the chemical transformations detailed in Figure S3 for proof of structure. This was verified by the TPAP-NMO mediated oxidation of the diastereomeric chlorohydrins *s*-**2c**-OH-NO<sub>2</sub> and *a*-**2c**-OH-NO<sub>2</sub>, derived from substrates *Z*-**1c**-NO<sub>2</sub> and *E*-**1c**-NO<sub>2</sub>, respectively (see Figure S3). Both substrates gave the chloroketone product with the same absolute stereochemistry (verified by both, HPLC and optical rotation). This is only possible if the face selectivity of the chlorenium delivery was the same for these two classes of substrates.

**Figure S3:** Determination of absolute stereochemistry of Cl-bearing stereocenter

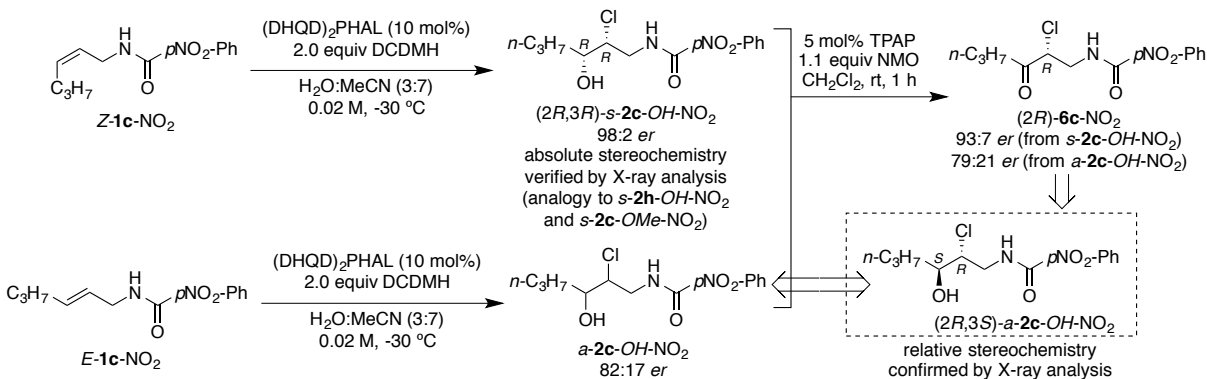

The intermolecular chloroetherification reaction of many substrates gave variable amounts of the chlorocyclized products in addition to the desired products. Intriguingly, the Cl-bearing stereocenter of both these products formed in the same reaction had the opposite stereochemistry based on chemical transformations and corroborating crystallographic evidence detailed below. While the chloroether product had an *R*-configuration for the Cl-bearing stereocenter, the chlorocyclized product had an *S*-configuration. With crystallographic evidence supporting the latter observation, we sought to unequivocally establish this divergence in stereoselectivity by chemical derivatization. An attempted synthesis of halohydrin *a*-**2b**-OH-Br from substrate *E*-**1b**-Br gave the chlorocyclized product *t*-**3b**-Br (36%, 97:3 *er*) in addition to the desired product *a*-**2b**-OH-Br (43%, 82:18 *er*). The stereochemistry of the Cl bearing stereocenter of *t*-**3b**-Br was assigned as *S* based on our prior studies.<sup>1</sup> The absolute stereochemistry of the Cl-bearing stereocenter in *a*-**2b**-OH-Br, on the other hand was inferred to be *R* (based on the crystal structures of *s*-**2c**-OMe-NO<sub>2</sub> and *s*-**2h**-OH-NO<sub>2</sub> and chemical transformations illustrated in Figure S4). In order to unequivocally establish this stereodivergence, *t*-**3b**-Br was transformed to *a*-**2b**-OH-Br by means of a two-step transformation shown in Figure S4. Optical rotation as well as HPLC co-injection confirmed that it was indeed the enantiomer of *a*-**2b**-OH-Br that had resulted from this transformation (Figure S5). These results lead us to conclude that two distinct mechanisms are in play that leads to either the cyclized dihydrooxazine products or the

**Figure S4.** Stereodivergence in the formation of halohydrin and oxazoline products

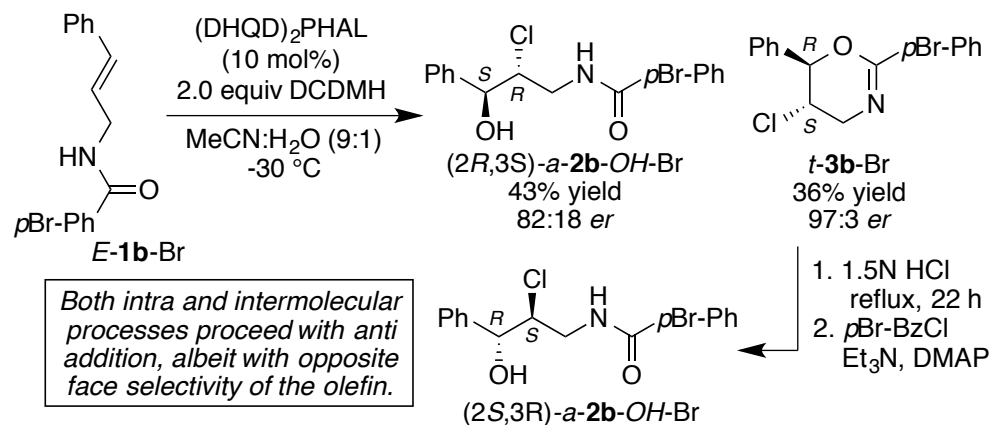

desired intermolecular addition of the nucleophile and halonium ion across the alkene in the *same* reaction.

**Figure S5:** HPLC trace for halohydrins

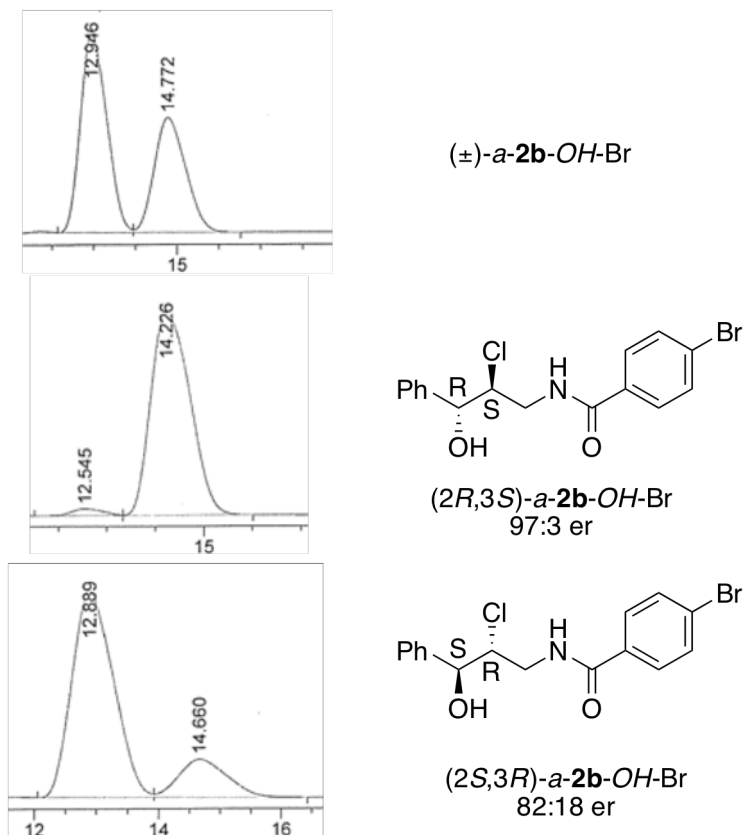

### VIIIa. Analytical data for determination of chlorine face selectivity of *E*-alkene

*a*-**2c**-OH-NO<sub>2</sub>: *N*-((*2R,3S*)-2-chloro-3-hydroxyhexyl)-4-nitrobenzamide

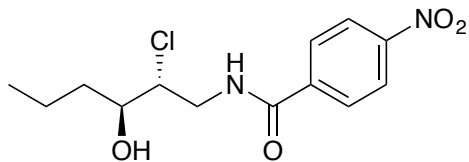

<sup>1</sup>H NMR (500 MHz, CDCl<sub>3</sub>) δ 8.31 (d, *J* = 8 Hz, 2H), 7.97 (d, *J* = 8.0 Hz, 2H), 6.83 (br s, 1H), 4.29-4.23 (m, 1H), 4.08 (br s, 1H), 3.94-3.92 (m, 1H), 3.68-3.63 (ddd, *J* = 15.0, 5.0, 3.5 Hz, 1H), 1.78-1.73 (m, 1H), 1.63-1.56 (m, 1H), 1.51-1.45 (m, 1H), 1.40-1.34 (m, 1H), 0.93 (t, *J* = 7.5 Hz, 3H)



$^{13}\text{C}$  NMR (125 MHz,  $\text{CDCl}_3$ )  $\delta$  167.02, 149.92, 138.88, 128.35, 123.99, 71.84, 64.41, 42.63, 35.29, 18.84, 13.97

HRMS analysis (ESI): Calculated for  $[\text{M-H}]^-$ :  $\text{C}_{13}\text{H}_{16}\text{ClN}_2\text{O}_4$ : 299.0799; Found: 299.0795

Resolution of enantiomers: DAICEL Chiralcel<sup>®</sup> OJ-H column, 7% IPA-Hexanes, 1.0 mL/min, 254 nm, RT1 (minor) = 11.9 min, RT2 (major) = 13.3 min.

$[\alpha]_D^{20} = -19.7$  (c 0.6,  $\text{CHCl}_3$ ,  $er = 85:15$ )

Relative stereochemistry was determined by single crystal X-ray diffraction (XRD). Crystals for XRD were obtained by crystallization from  $\text{CH}_2\text{Cl}_2$  layered with hexanes in a silicone-coated vial.

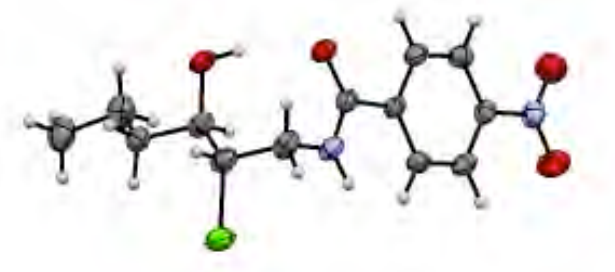

(2*R*)-**6c**-NO<sub>2</sub>: (*R*)-*N*-(2-chloro-3-oxohexyl)-4-nitrobenzamide

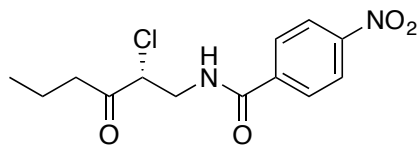

$^1\text{H}$  NMR (500 MHz,  $\text{CDCl}_3$ )  $\delta$  8.29 (d,  $J = 9.0$  Hz, 2H), 7.90 (d,  $J = 9.0$  Hz, 2H), 6.70 (br, 1H), 4.53 (t,  $J = 6$  Hz, 1H), 3.98-3.87 (m, 2H), 2.83-2.76 (m, 1H), 2.60-2.53 (m, 1H), 1.66-1.60 (m, 2H), 0.94 (t,  $J = 8$  Hz, 3H)

$^{13}\text{C}$  NMR (125 MHz,  $\text{CDCl}_3$ )  $\delta$  204.45, 165.52, 149.80, 139.23, 128.20, 123.92, 58.61, 41.93, 41.82, 17.07, 13.52

(ESI): Calculated for  $[\text{M-H}]^-$ :  $\text{C}_{13}\text{H}_{14}\text{N}_2\text{O}_4\text{Cl}$ : 297.0642; Found: 297.0644

Resolution of enantiomers: DAICEL Chiralcel<sup>®</sup> IA column, 20% IPA- HRMS analysis Hexanes, 1.0 mL/min, 250 nm, RT1 (major) = 8.2 min, RT2 (minor) = 8.9 min.

$[\alpha]_D^{20} = +17.2$  (c 0.35,  $\text{CHCl}_3$ ,  $er = 93:7$ ) from *cis* halohydrin

$[\alpha]_D^{20} = +13.0$  (c 0.24,  $\text{CHCl}_3$ ,  $er = 82:18$ ) from *trans* halohydrin

(2*S*,3*R*)-**a-2b-OH-Br**: 4-bromo-*N*-((2*S*,3*R*)-2-chloro-3-hydroxy-3-phenylpropyl)benzamide

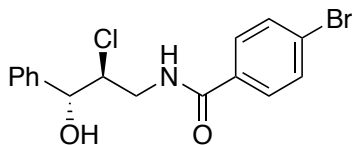

$^1\text{H NMR}$  (500 MHz,  $\text{CDCl}_3$ )  $\delta$  7.67 (d,  $J = 9.0$  Hz, 2H), 7.61 (d,  $J = 9.0$  Hz, 2H), 7.30-7.31 (m, 4H), 6.65 (br s, 1H), 4.70 (d,  $J = 4.5$  Hz, 1H) 4.61 (dd,  $J = 8.0, 4.0$  Hz 1H), 4.22-4.19 (m, 1H), 3.66-3.61 (m, 1H)

$^{13}\text{C NMR}$  (125 MHz,  $\text{CDCl}_3$ )  $\delta$  168.19, 139.61, 132.03, 132.00, 128.74, 128.43, 128.32, 127.03, 126.89, 74.64, 64.65, 42.42

HRMS analysis (ESI): Calculated for  $[\text{M}+\text{H}]^+$ :  $\text{C}_{16}\text{H}_{16}\text{ClBrNO}_2$ : 368.0053; Found: 368.0053

Resolution of enantiomers: DAICEL Chiralcel<sup>®</sup> AD-H column, 15% IPA-Hexanes, 1.0 mL/min, 254 nm, RT1 (minor) = 12.5 min, RT2 (major) = 14.5 min.

$[\alpha]_D^{20} = -2.0$  (c 0.3,  $\text{CHCl}_3$ ,  $er = 97:3$ )

(2*R*,3*S*)-**a-2b-OH-Br**: 4-bromo-*N*-((2*R*,3*S*)-2-chloro-3-hydroxy-3-phenylpropyl)benzamide

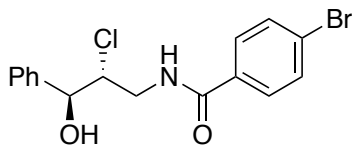

$^1\text{H NMR}$  (500 MHz,  $\text{CDCl}_3$ )  $\delta$  7.67 (d,  $J = 9.0$  Hz, 2H), 7.61 (d,  $J = 9.0$  Hz, 2H), 7.30-7.31 (m, 4H), 6.65 (br s, 1H), 4.70 (d,  $J = 4.5$  Hz, 1H) 4.61 (dd,  $J = 8.0, 4.0$  Hz 1H), 4.22-4.19 (m, 1H), 3.66-3.61 (m, 1H)

$^{13}\text{C NMR}$  (125 MHz,  $\text{CDCl}_3$ )  $\delta$  168.19, 139.61, 132.03, 132.00, 128.74, 128.43, 128.32, 127.03, 126.89, 74.64, 64.65, 42.42

HRMS analysis (ESI): Calculated for  $[M+H]^+$ :  $C_{16}H_{16}ClBrNO_2$ : 368.0053; Found: 368.0053

Resolution of enantiomers: DAICEL Chiralcel<sup>®</sup> AD-H column, 15% IPA-Hexanes, 1.0 mL/min, 254 nm, RT1 (major) = 12.5 min, RT2 (minor) = 14.5 min.

$[\alpha]_D^{20} = +2.3$  (c 0.57,  $CHCl_3$ ,  $er = 82:18$ )

## IX. References

- (1) Jaganathan, A.; Garzan, A.; Whitehead, D. C.; Staples, R. J.; Borhan, B. *Angew. Chem. Int. Ed.* **2011**, *50*, 2593.
- (2) Panzik, H. L.; Mulvaney, J. E. *Journal of Polymer Science Part A-1: Polymer Chemistry* **1972**, *10*, 3469.
- (3) Lei, A.; Wu, S.; He, M.; Zhang, X. *J. Am. Chem. Soc.* **2004**, *126*, 1626.

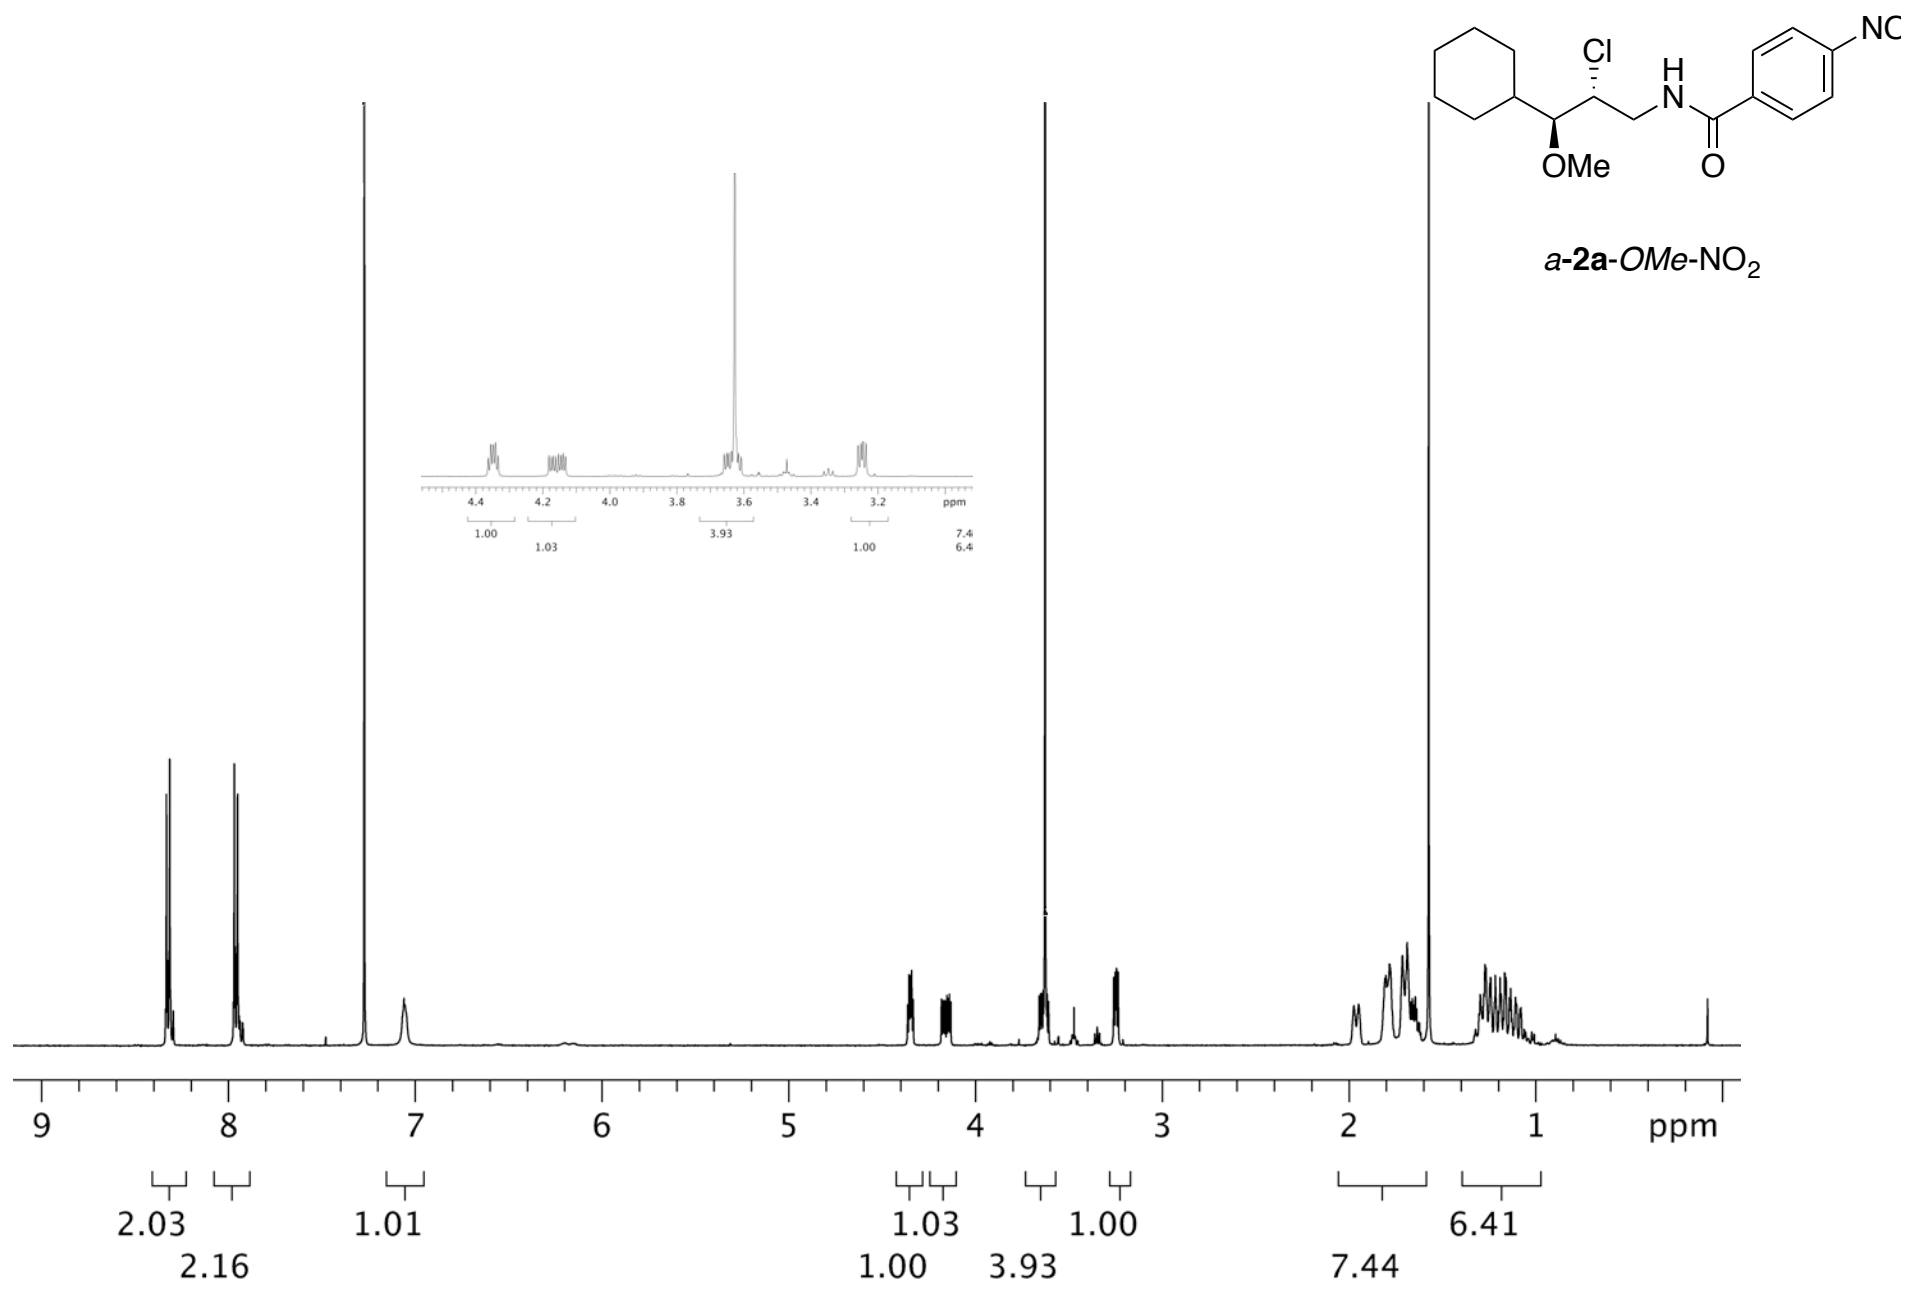

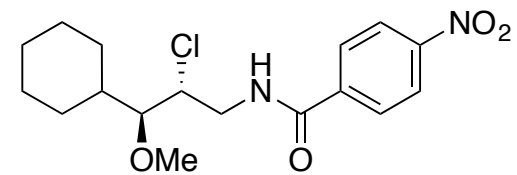

*a*-2a-OMe-NO<sub>2</sub>

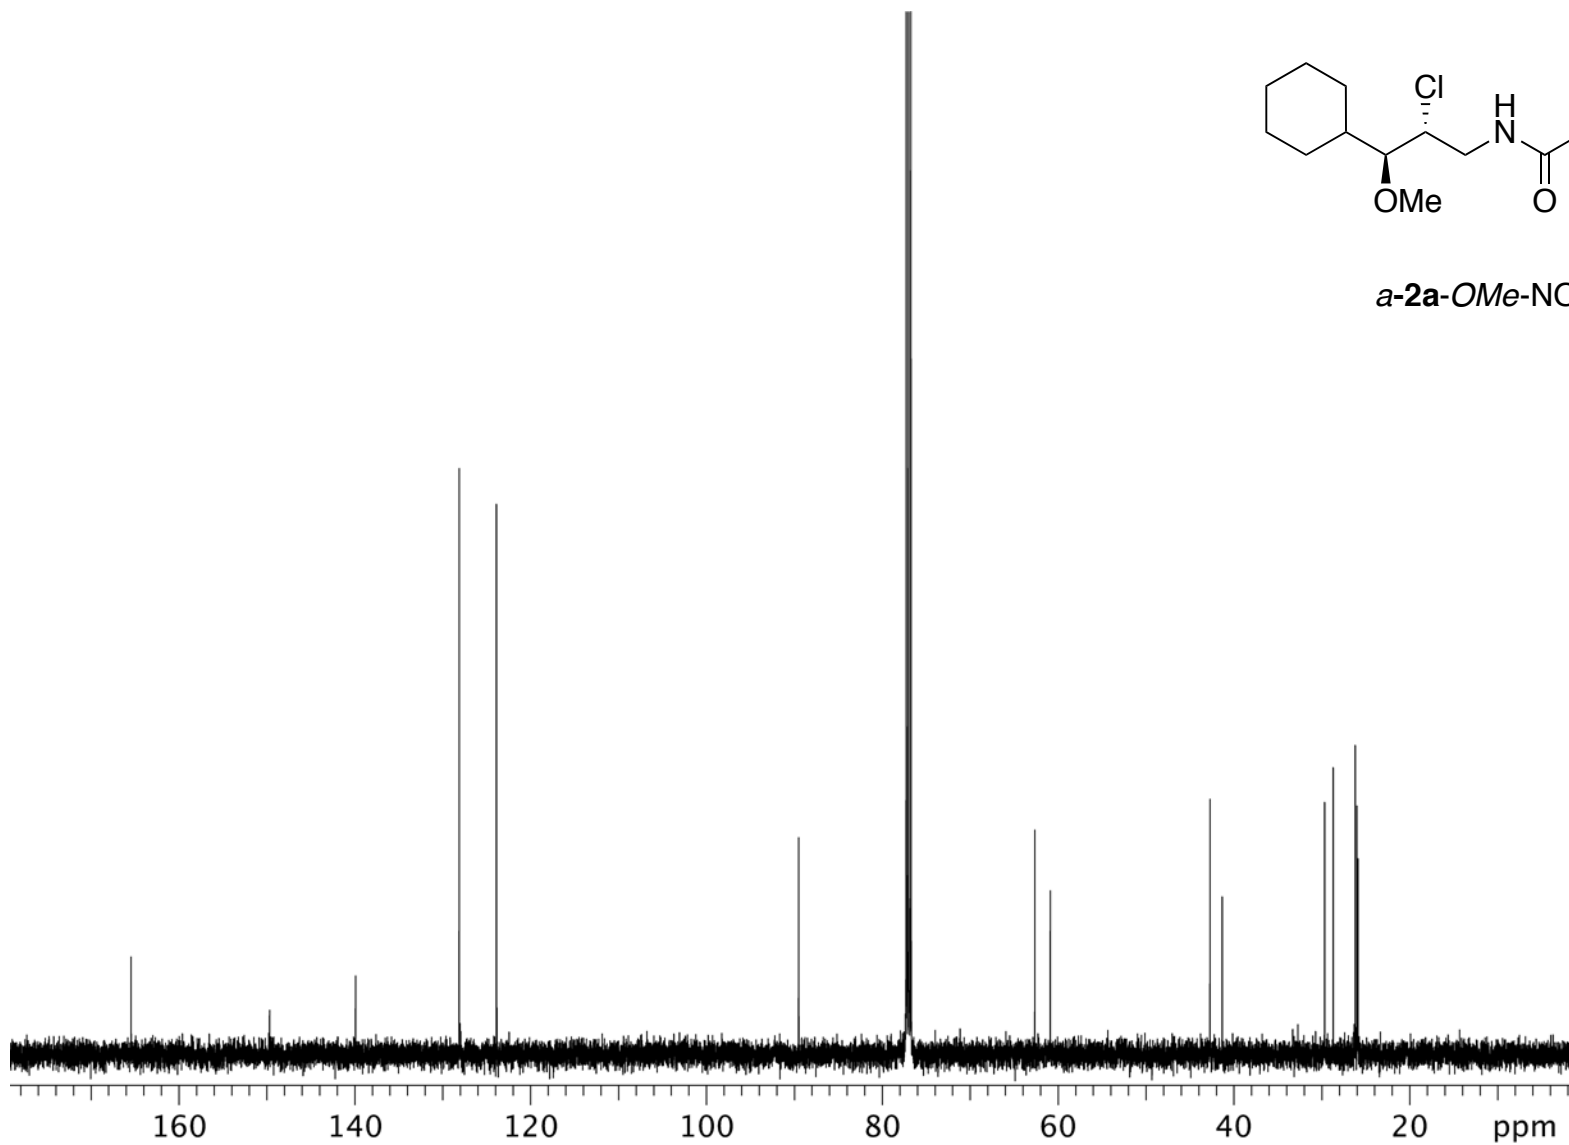

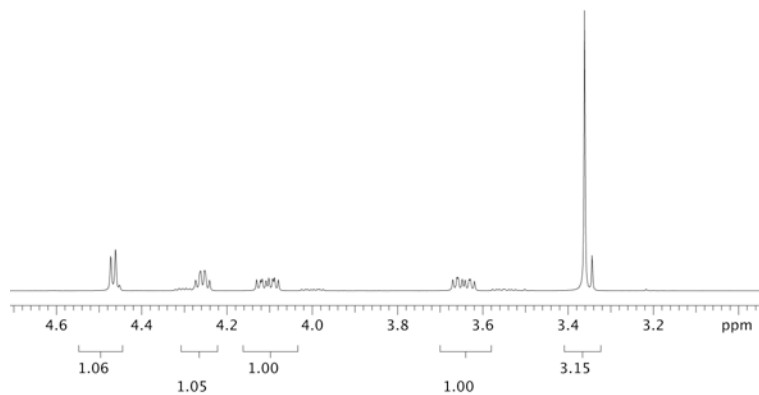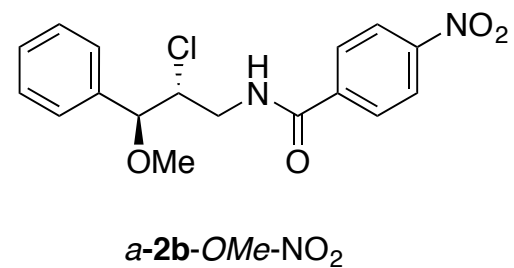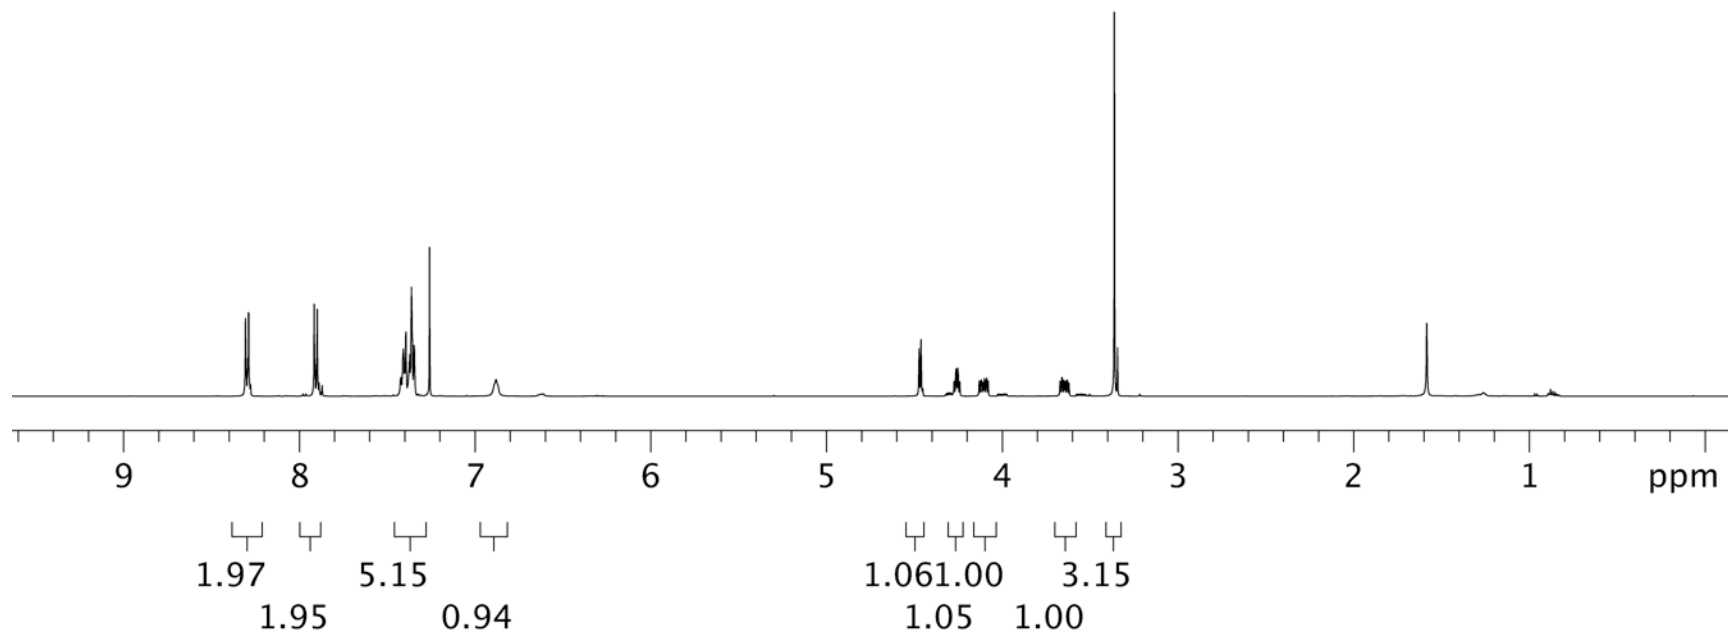

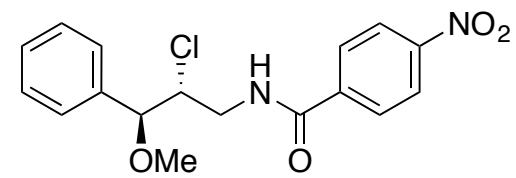

*a-2b-OMe-NO<sub>2</sub>*

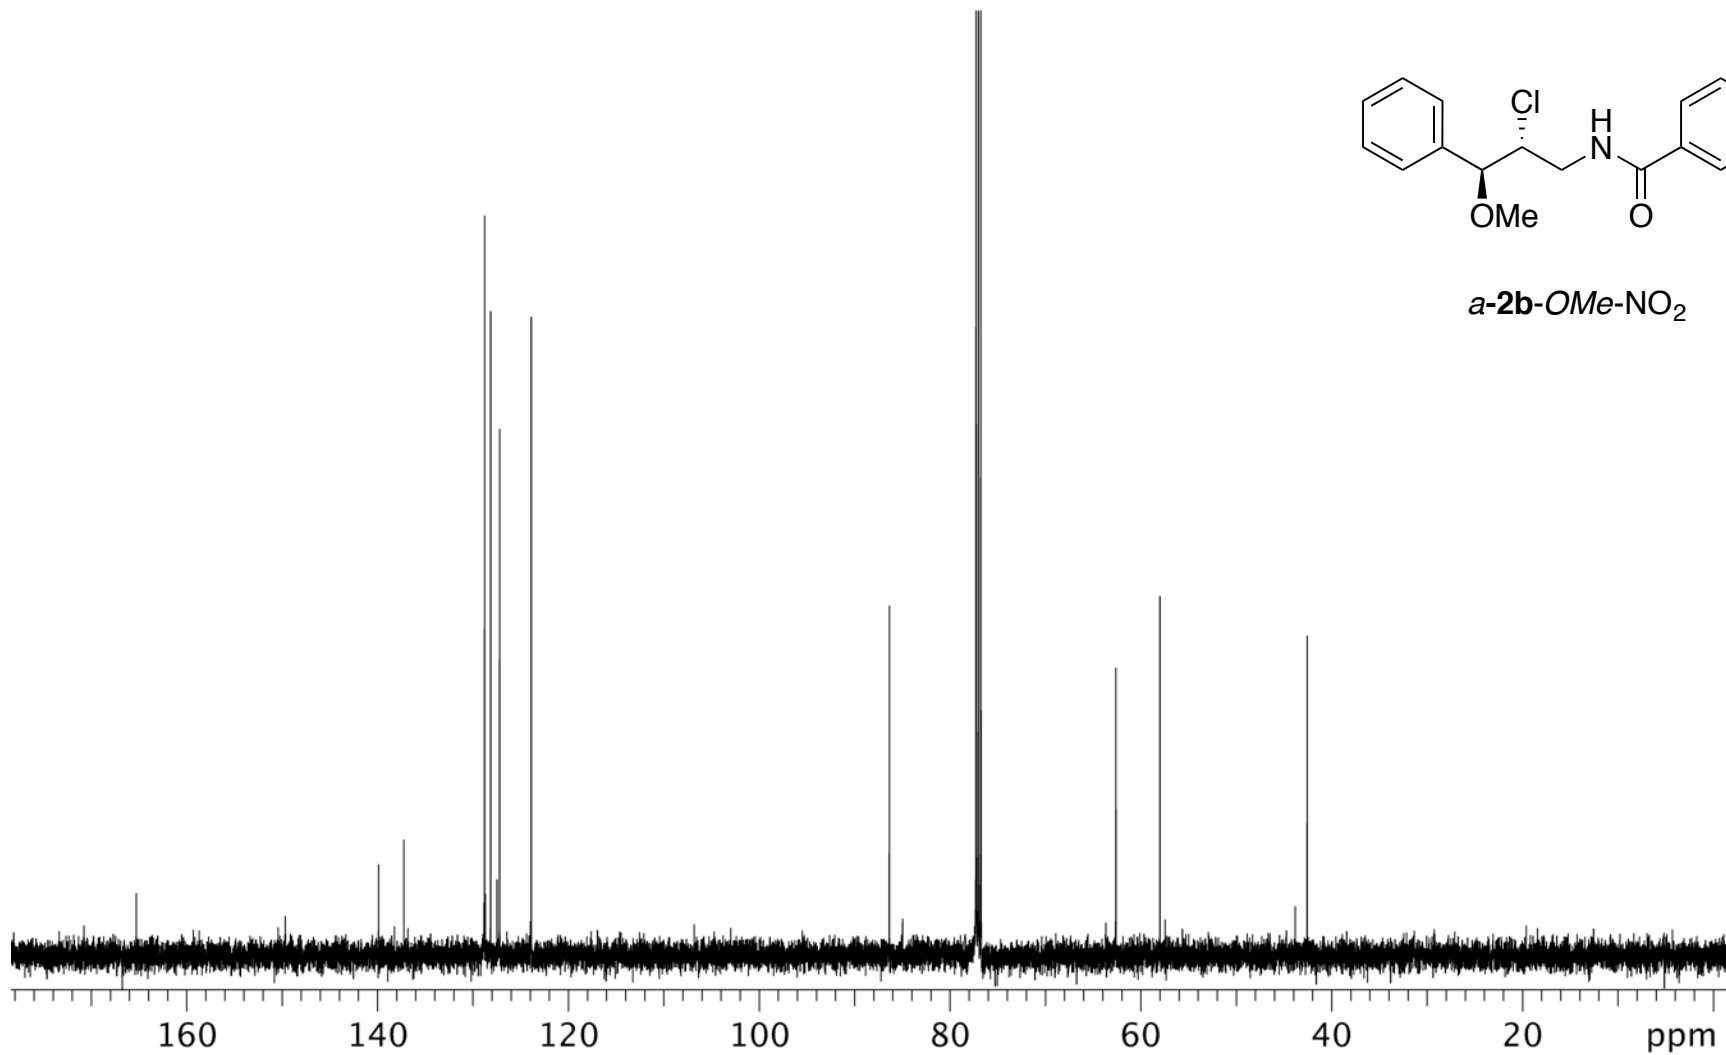

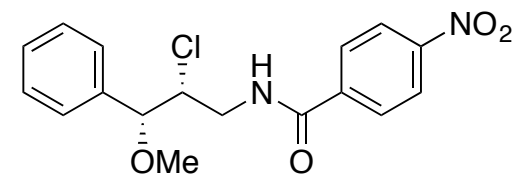

s-2b-OMe-NO<sub>2</sub>

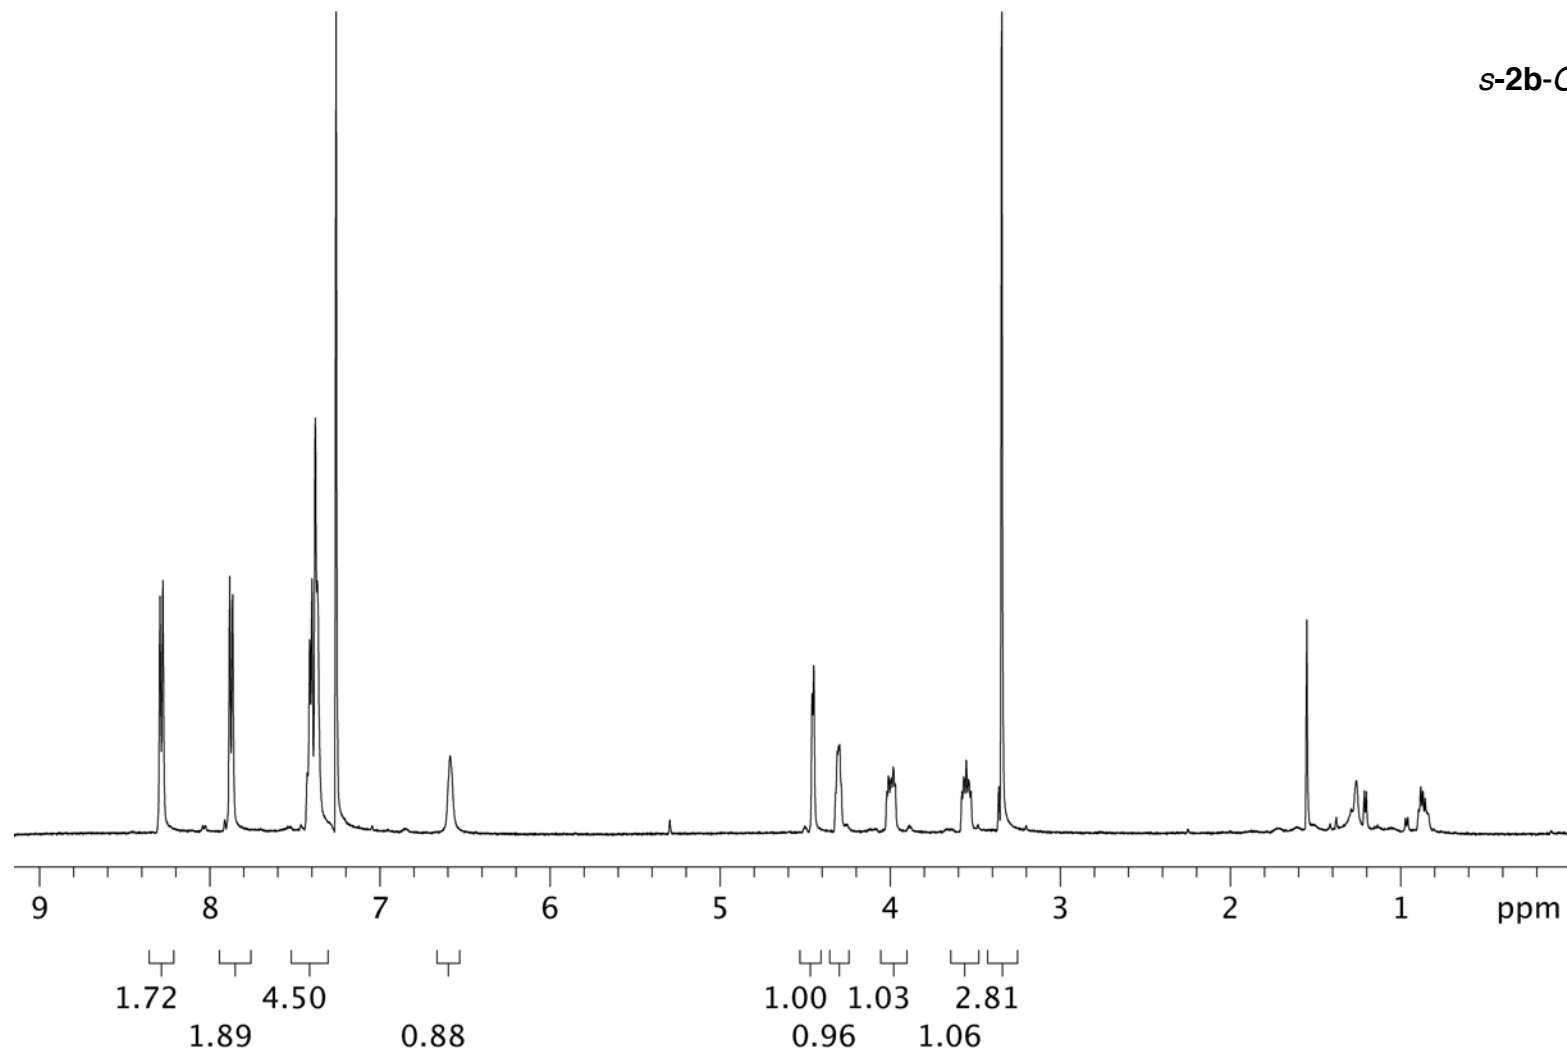



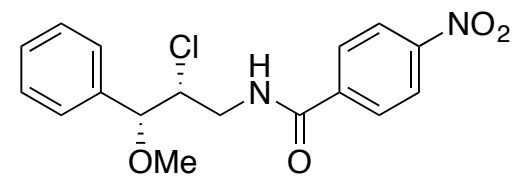

*s*-2b-OMe-NO<sub>2</sub>

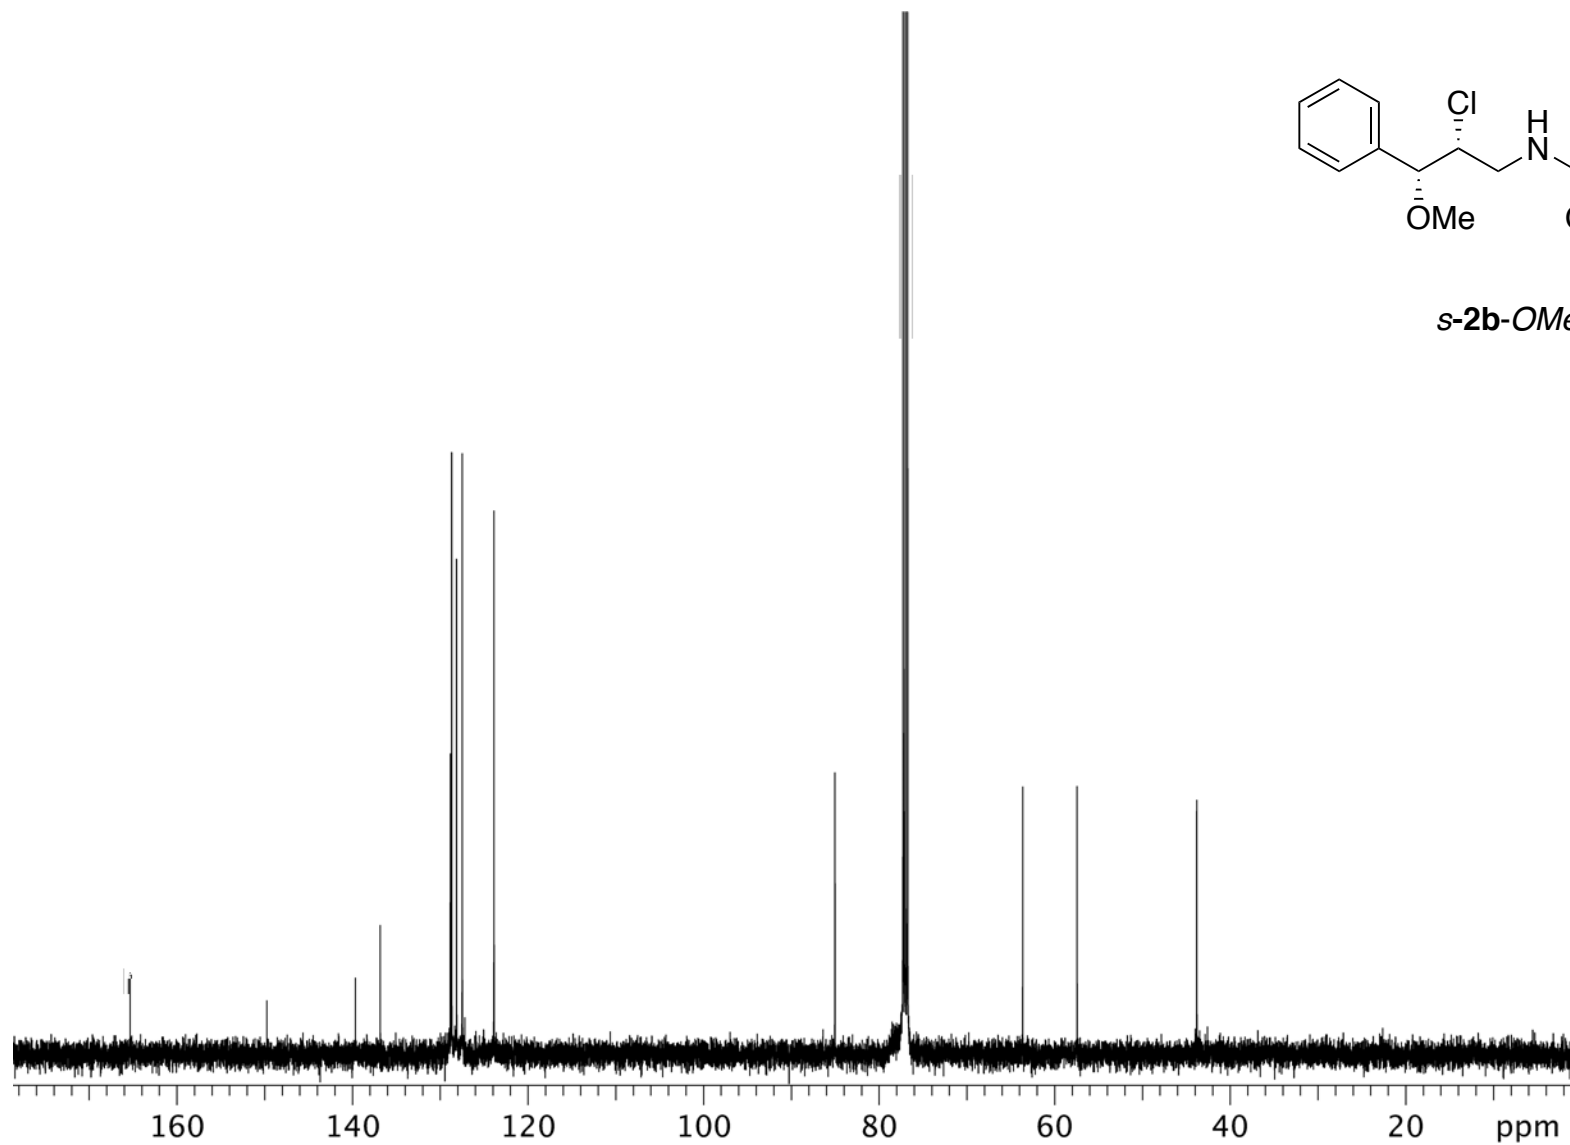

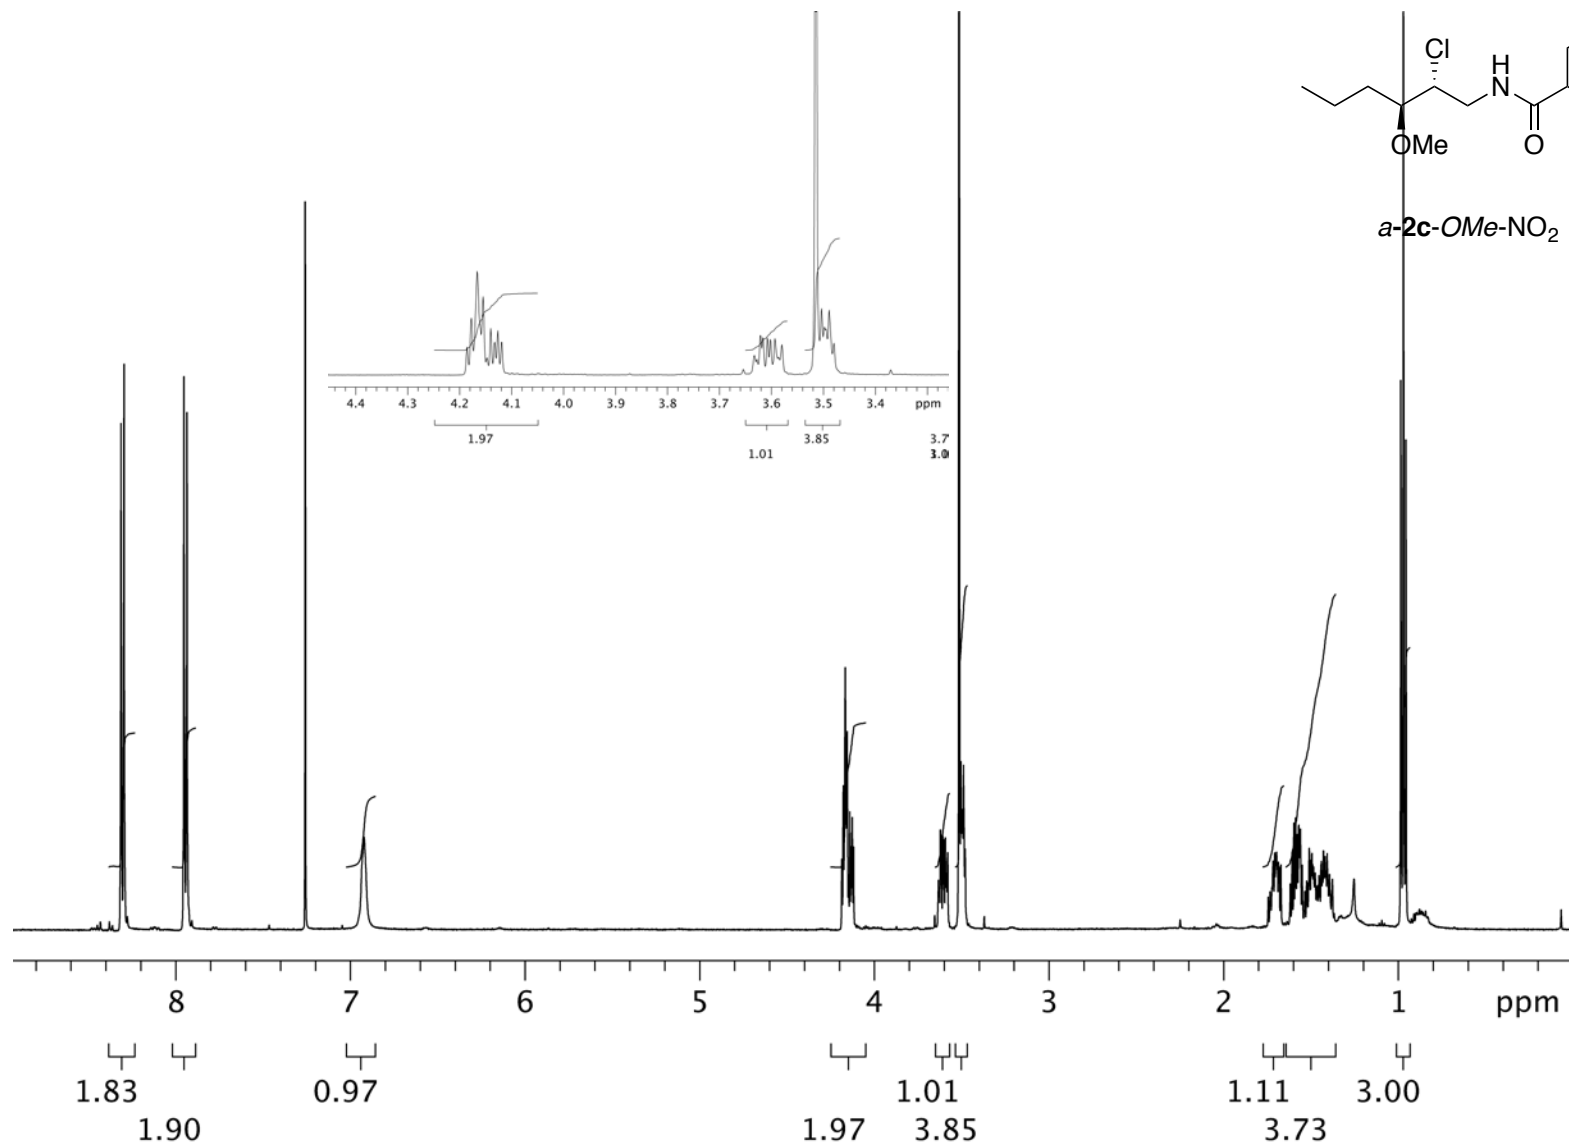

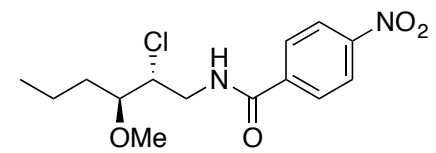

*a-2c-OMe-NO<sub>2</sub>*

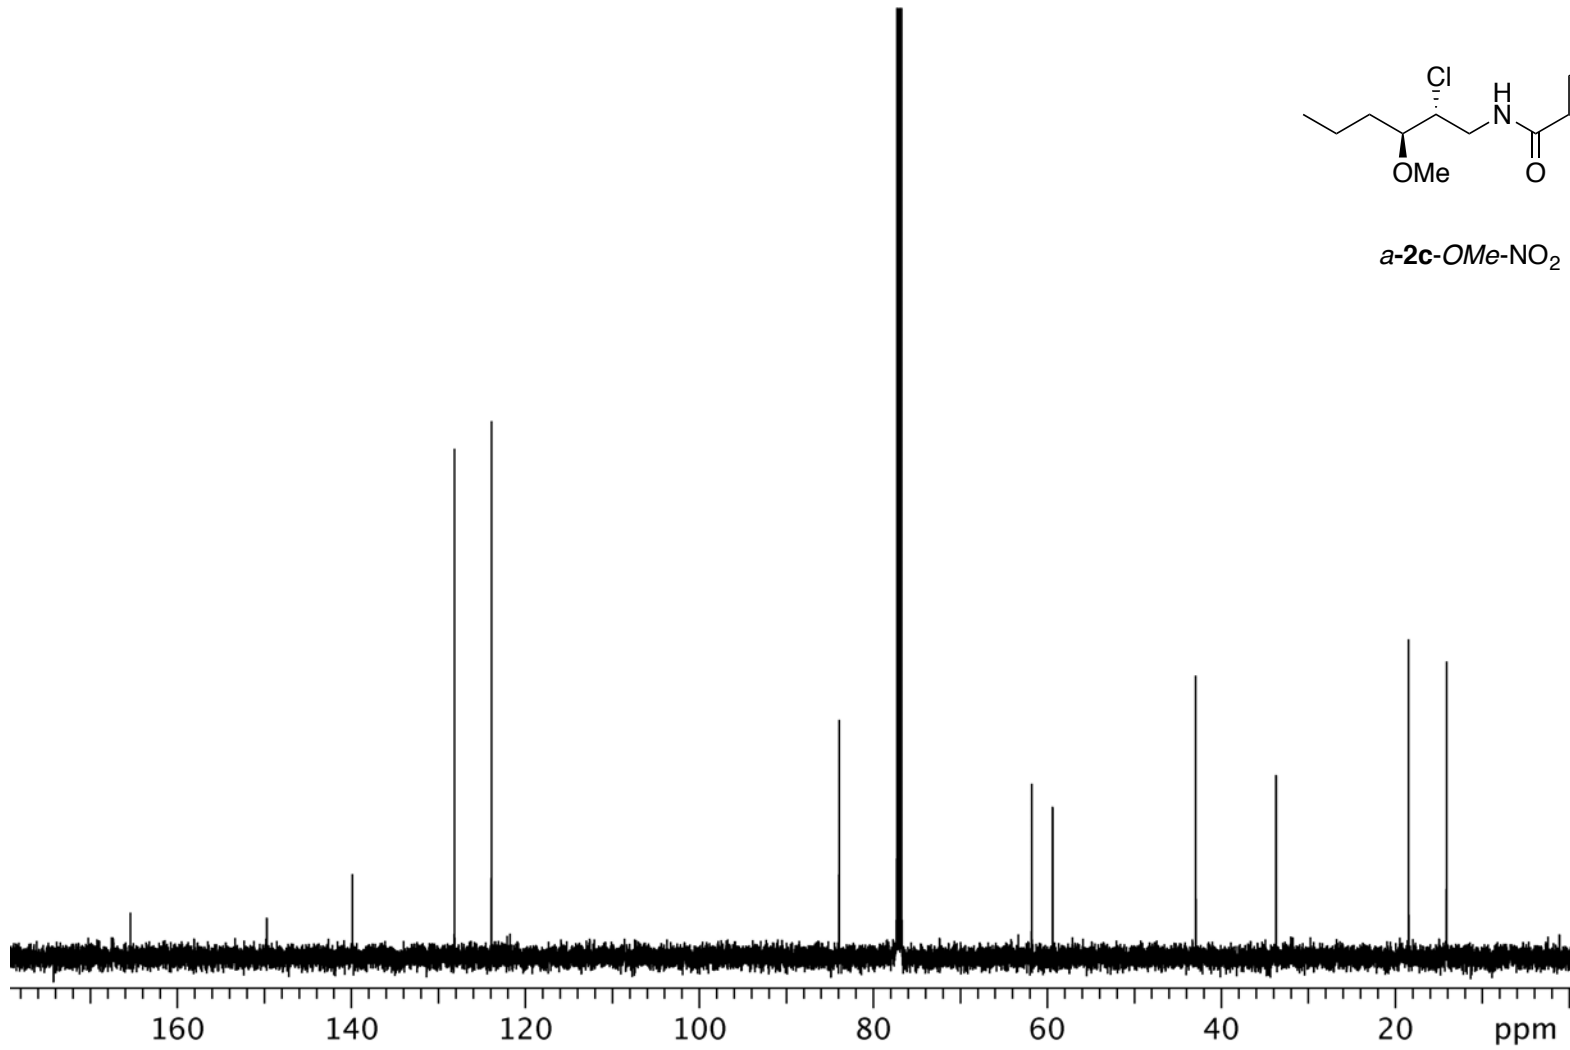

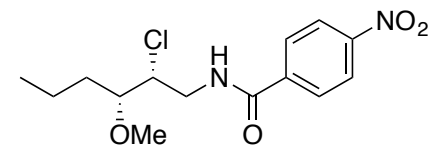

*s*-2c-OMe-NO<sub>2</sub>

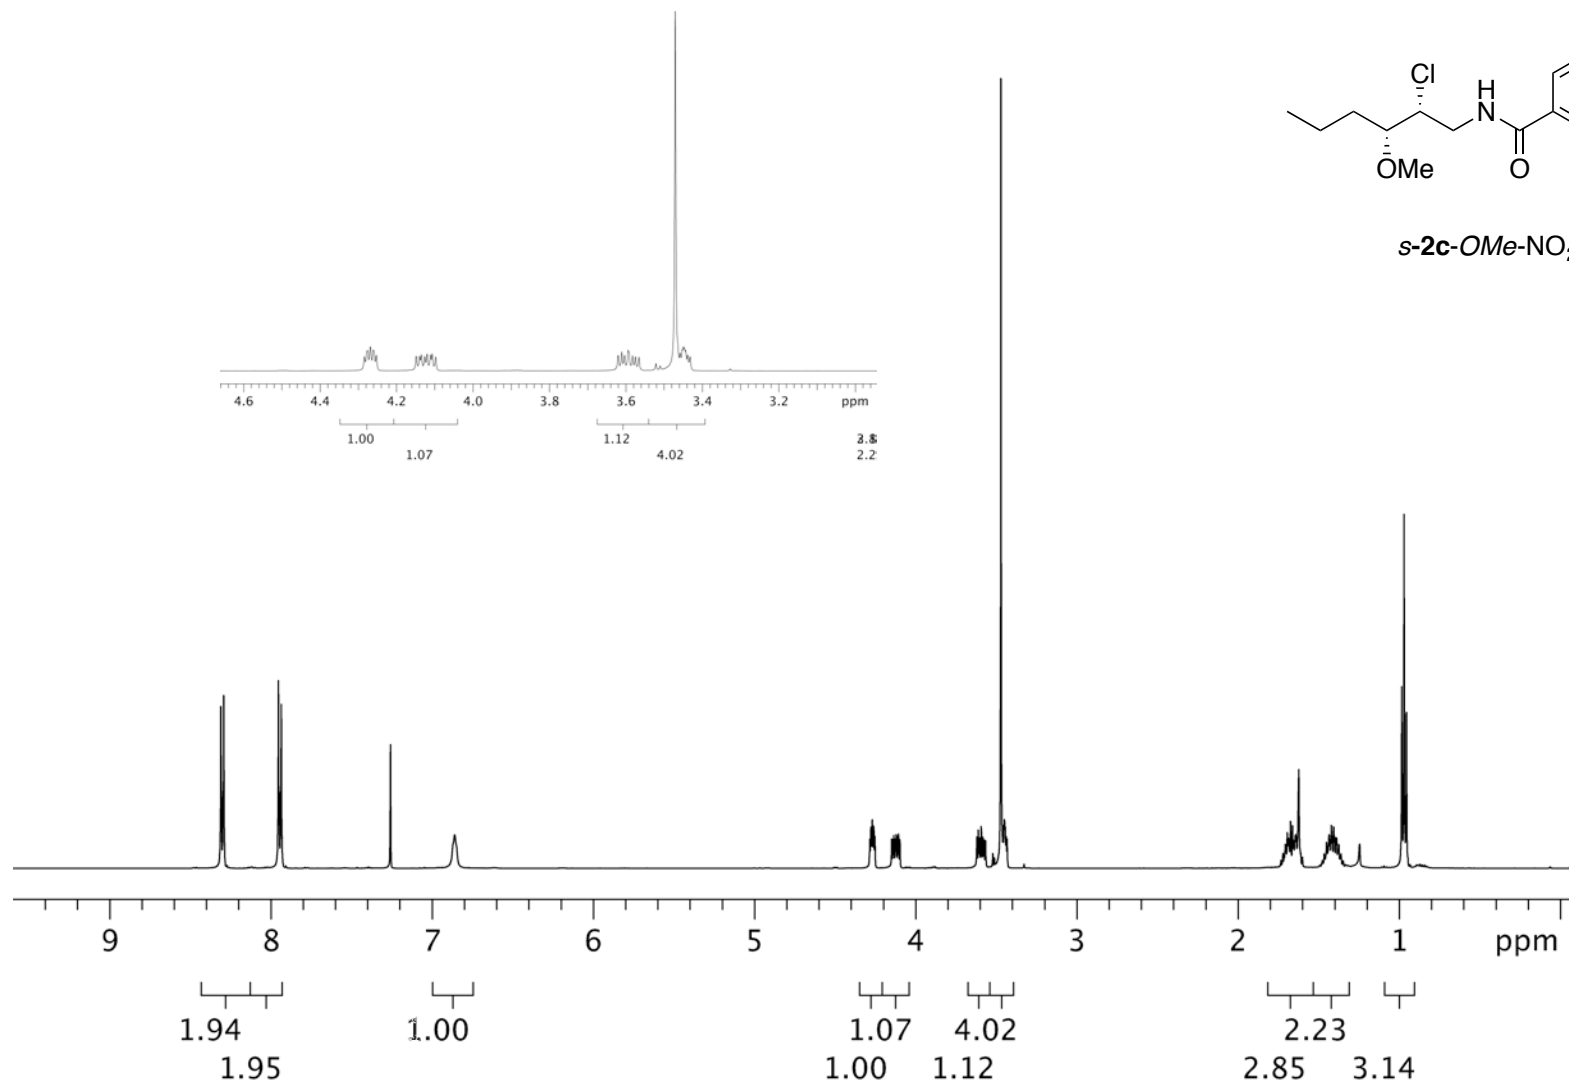

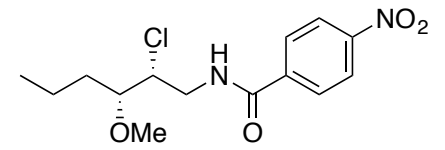

*s*-2c-OMe-NO<sub>2</sub>

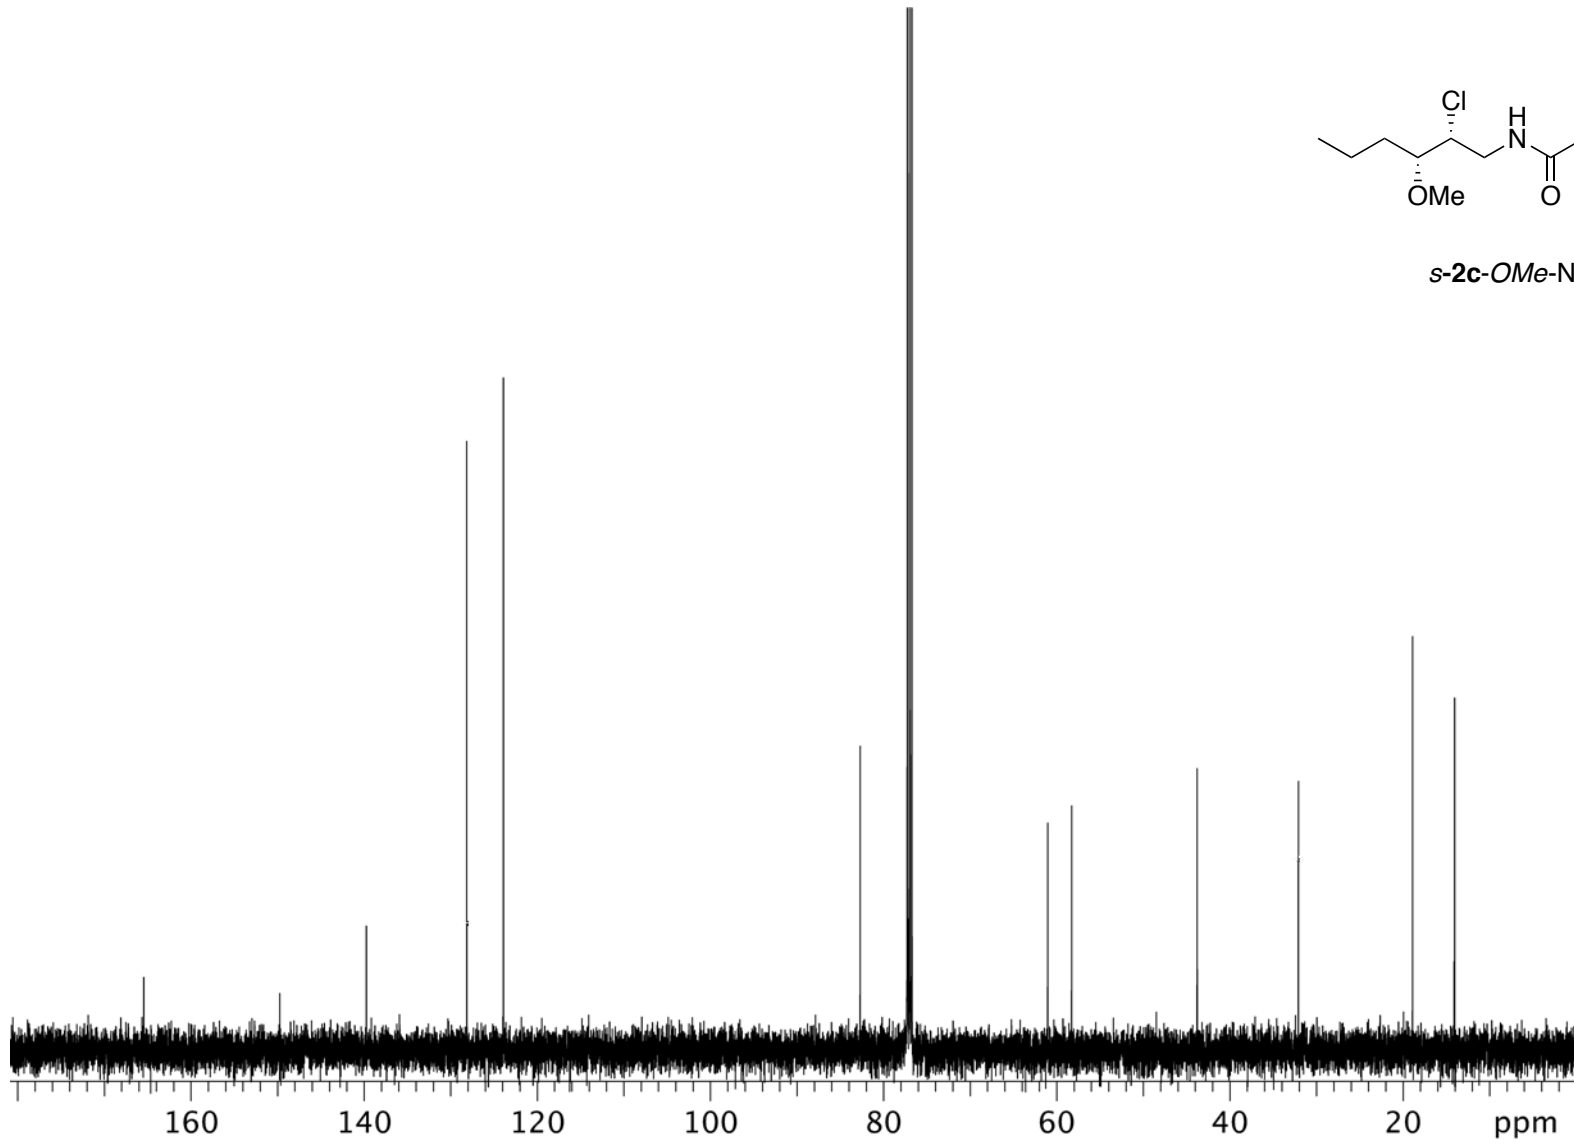

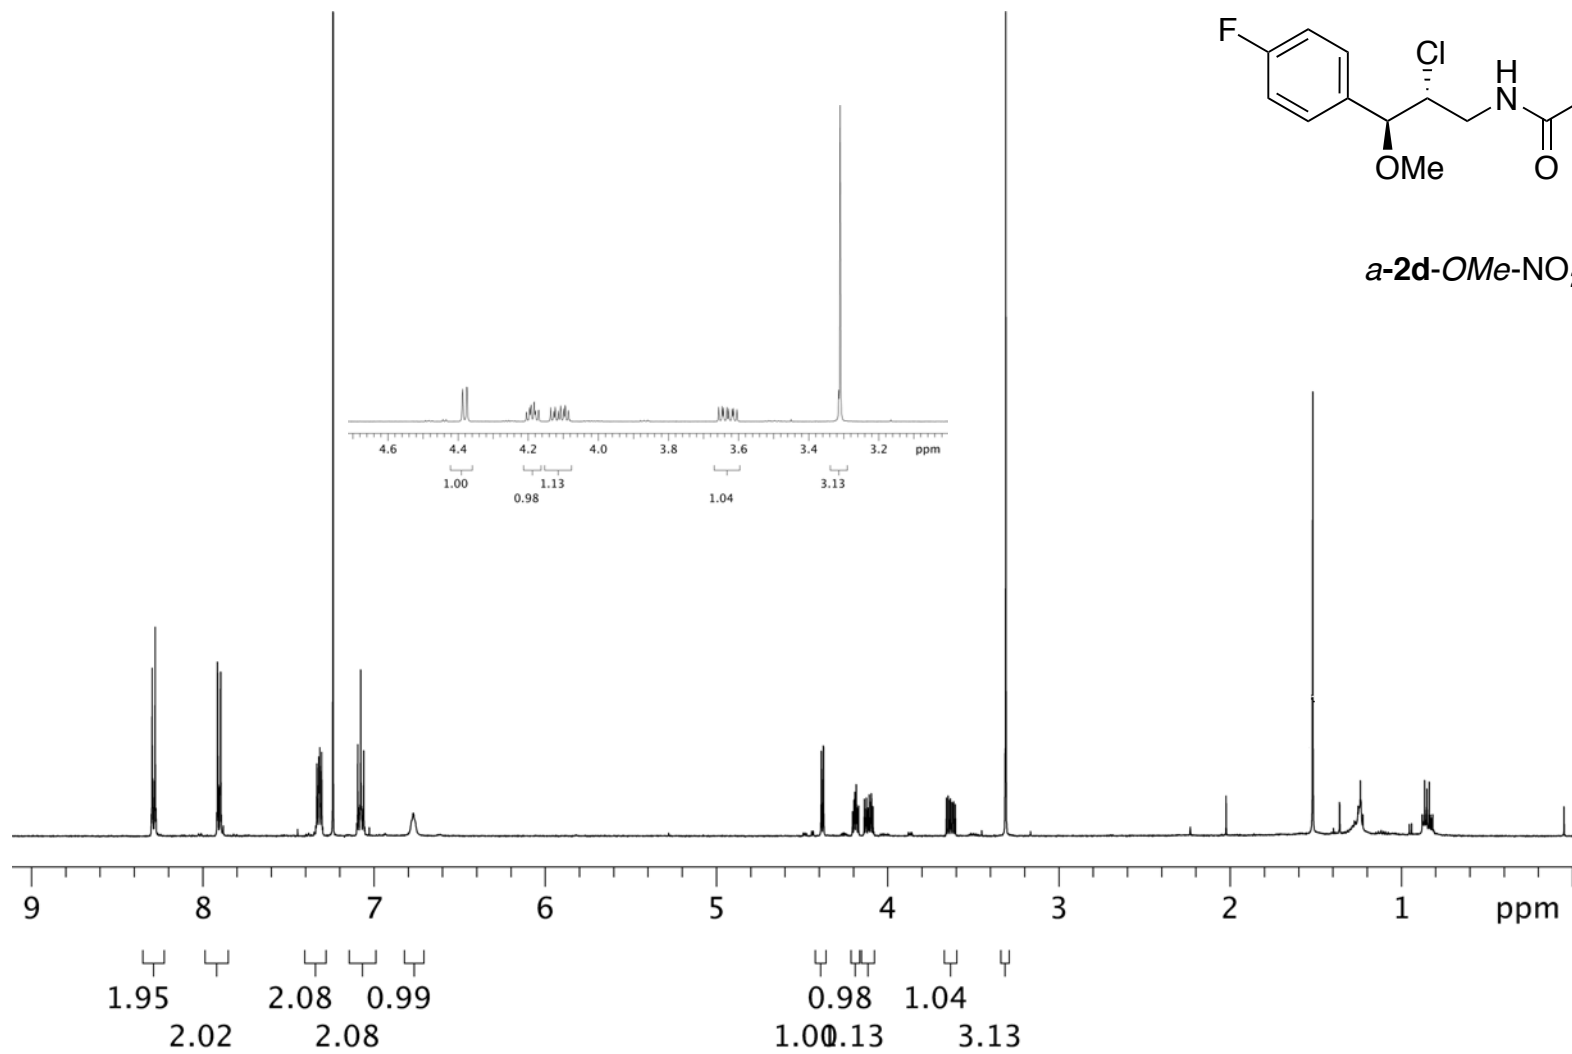

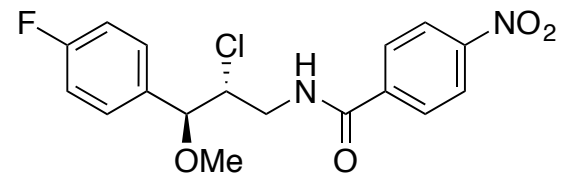

*a-2d-OMe-NO<sub>2</sub>*

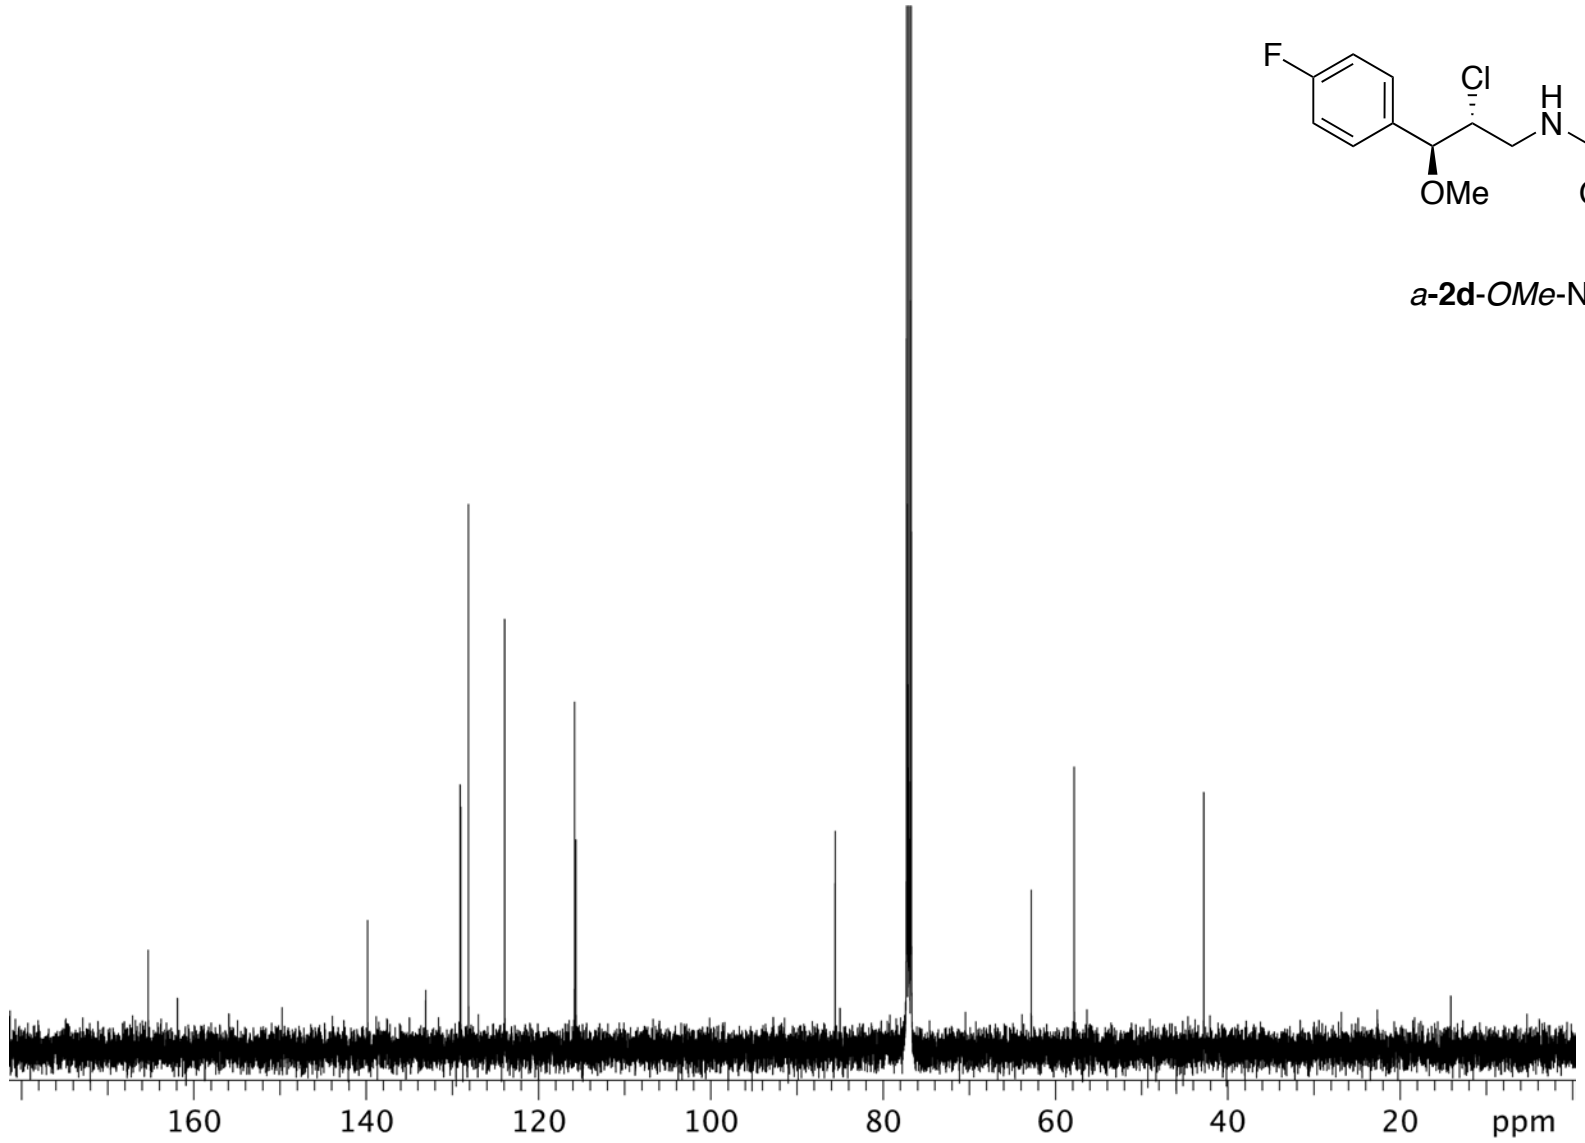

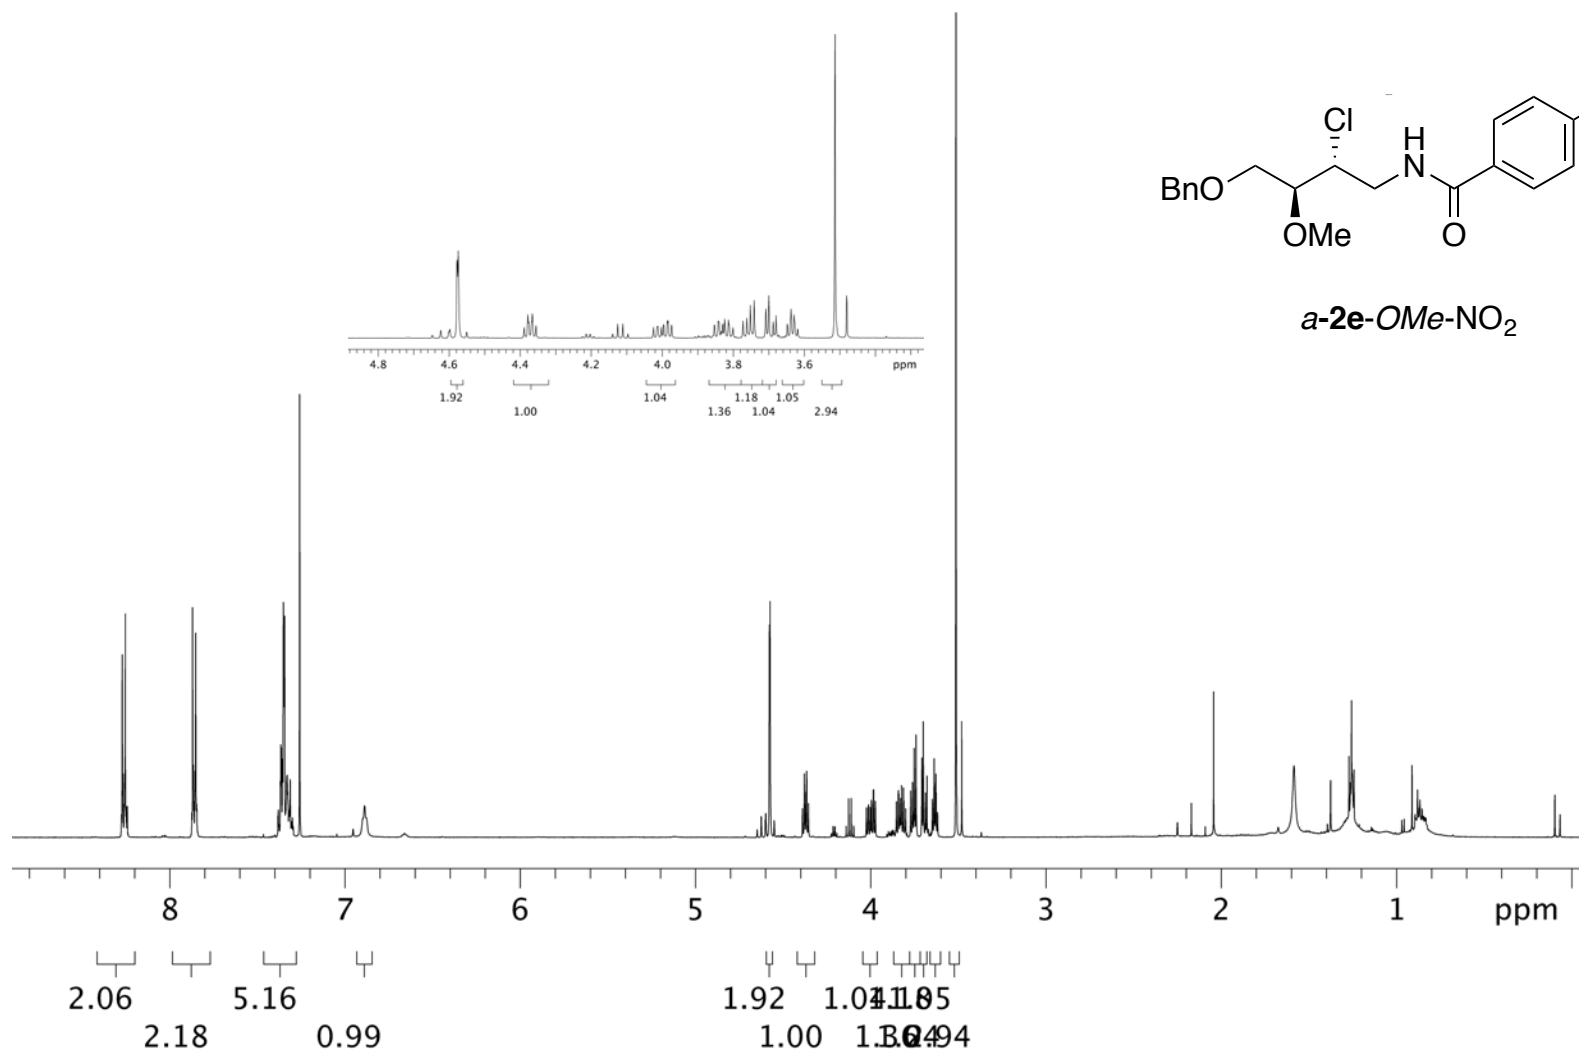



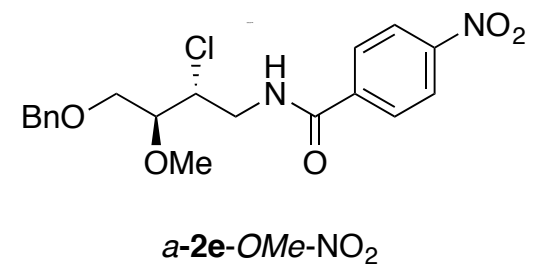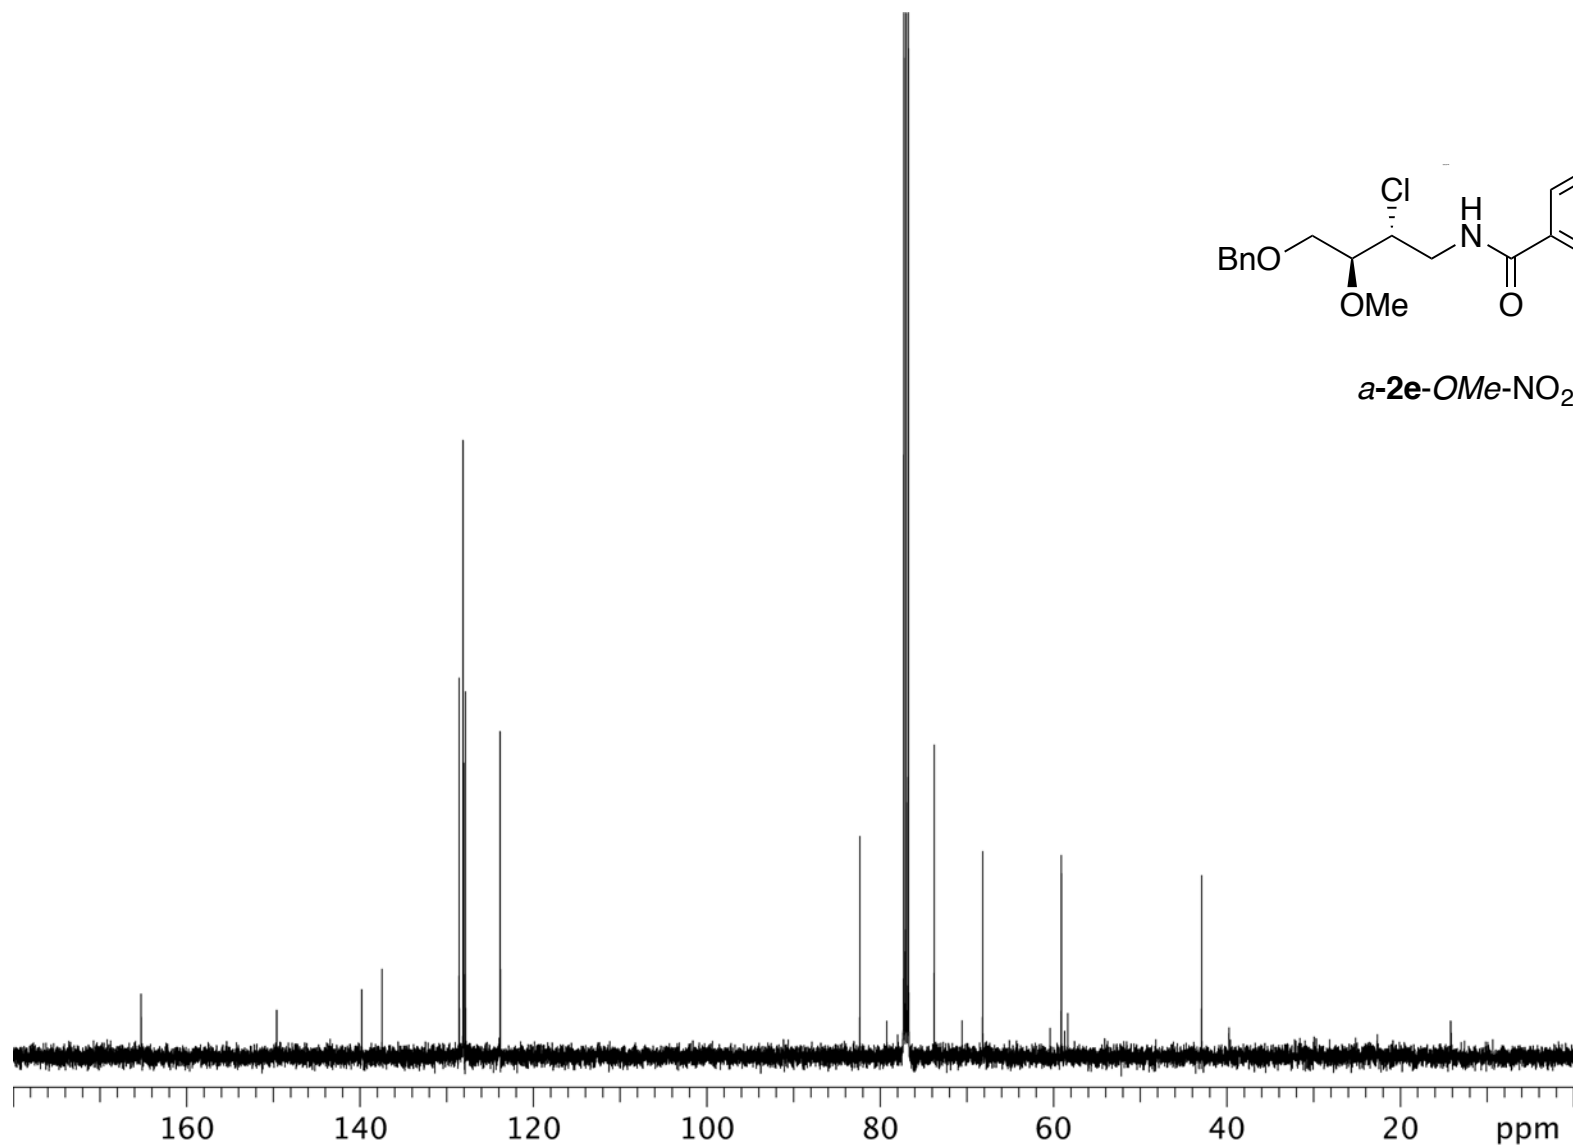

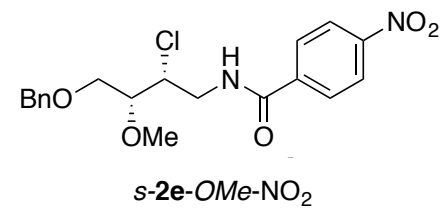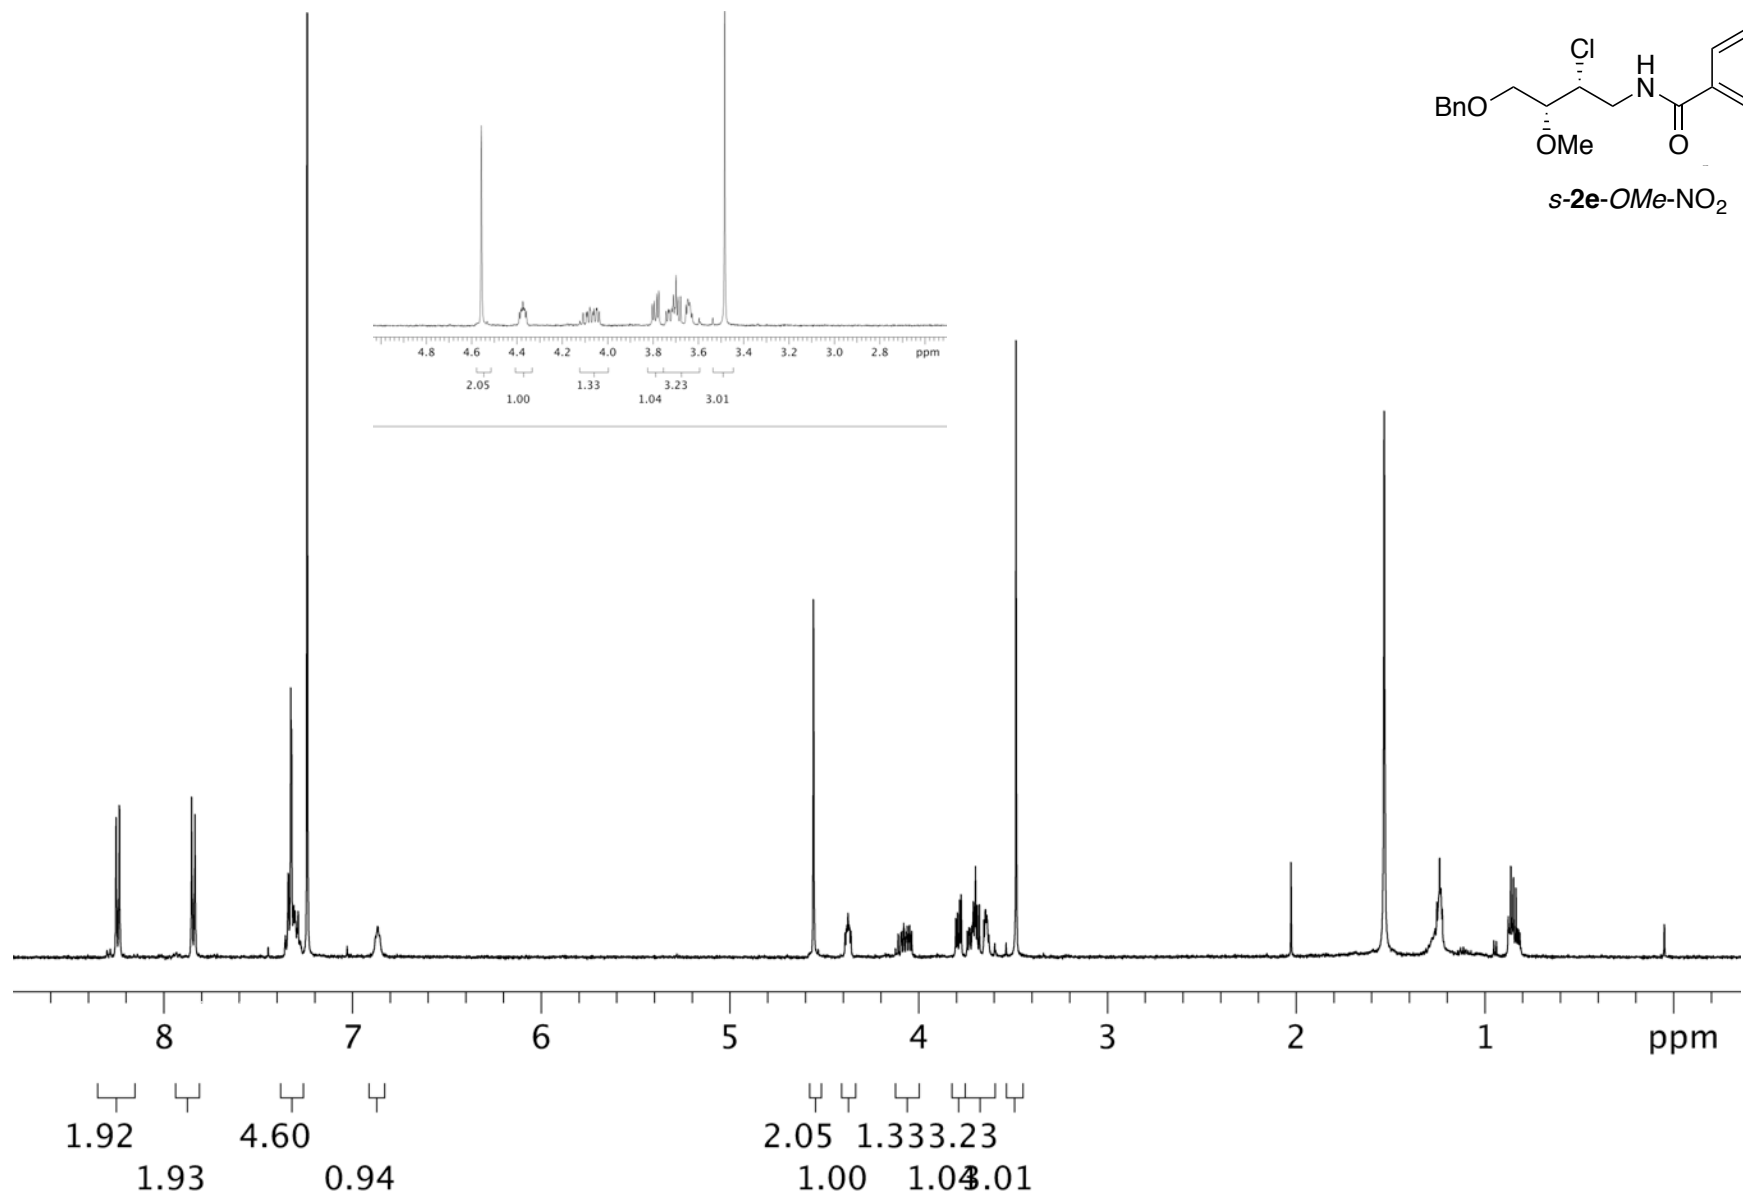

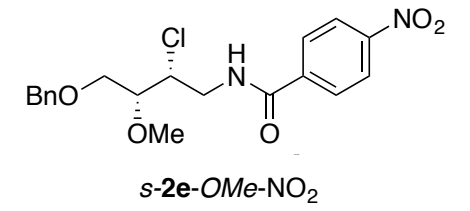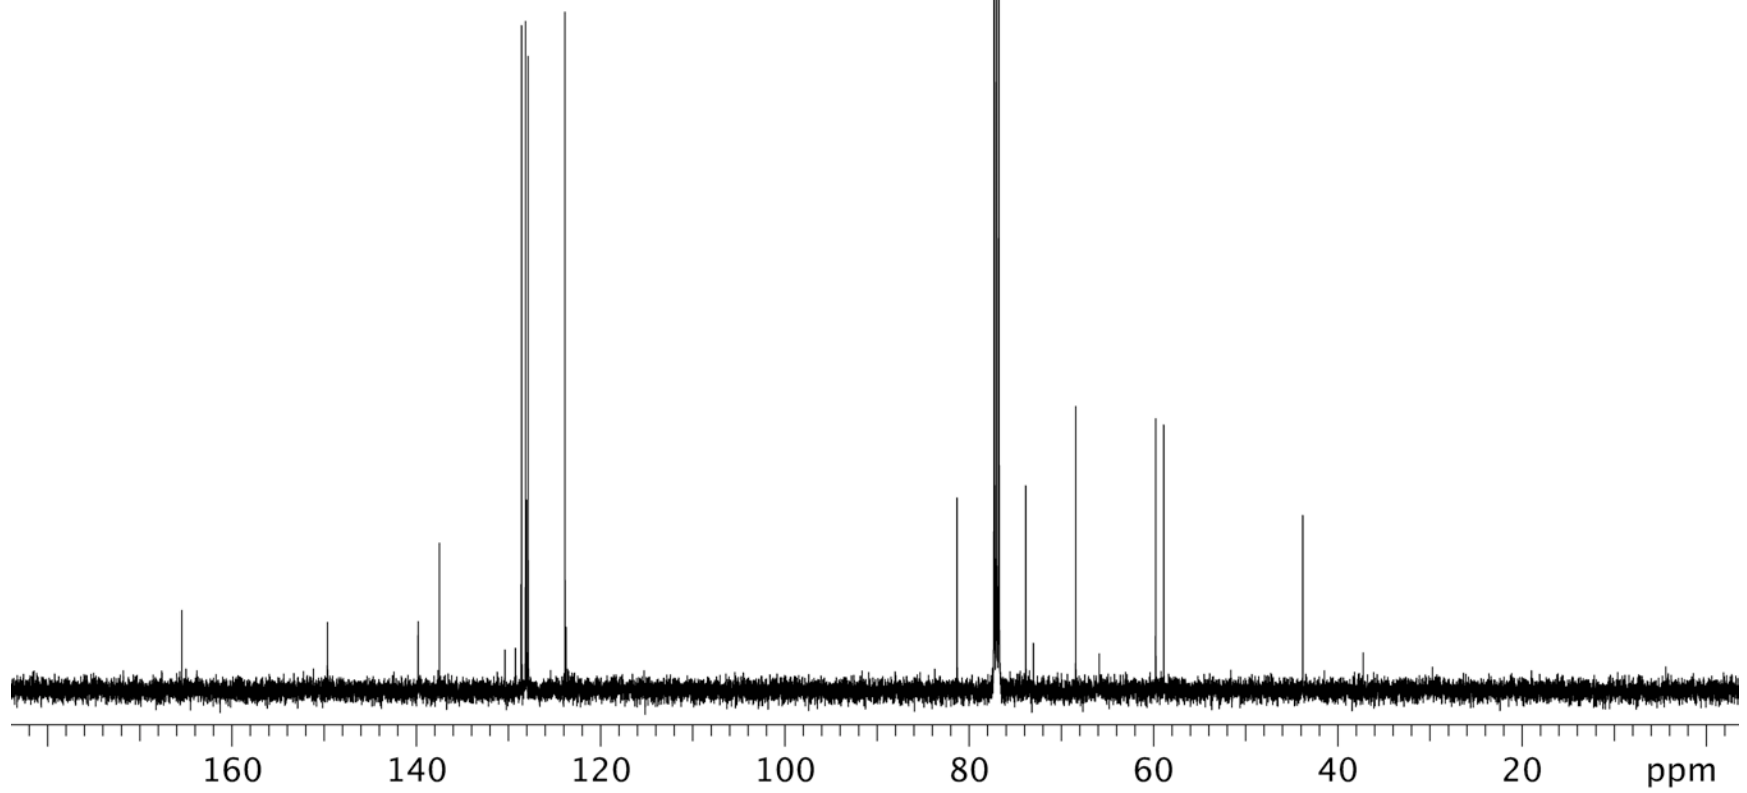

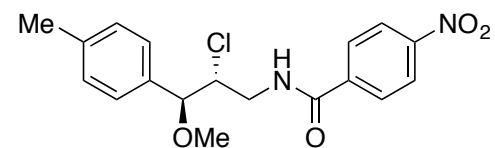

*a-2f-OMe-NO<sub>2</sub>*

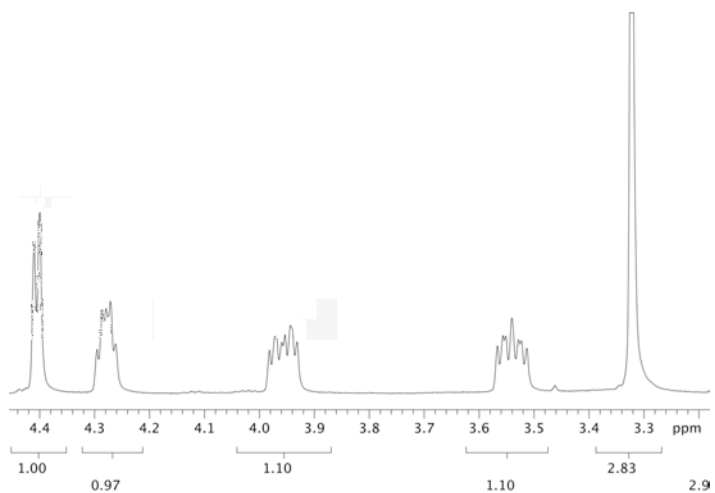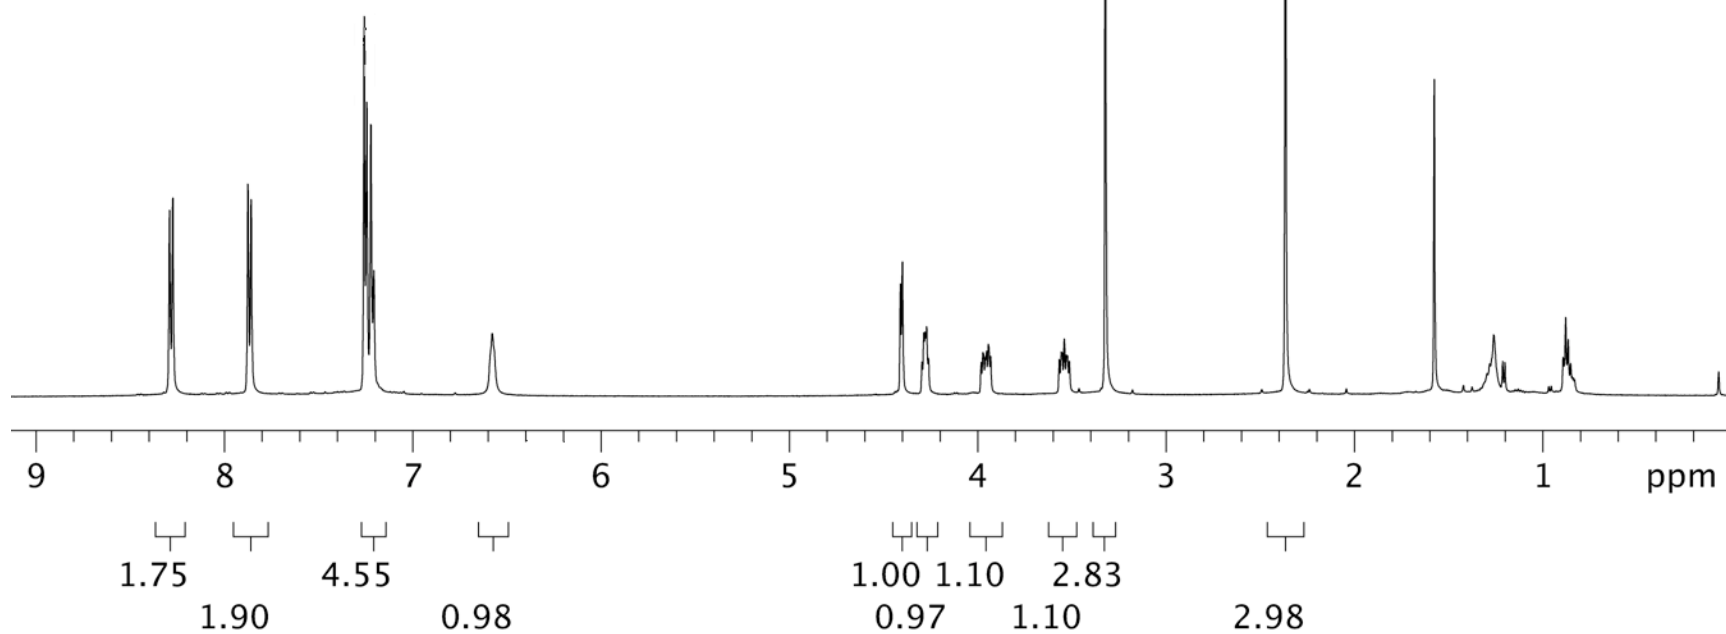

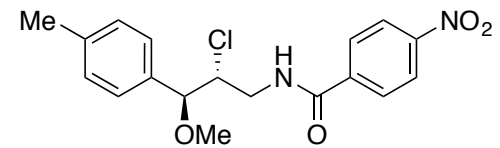

*a*-2f-OMe-NO<sub>2</sub>

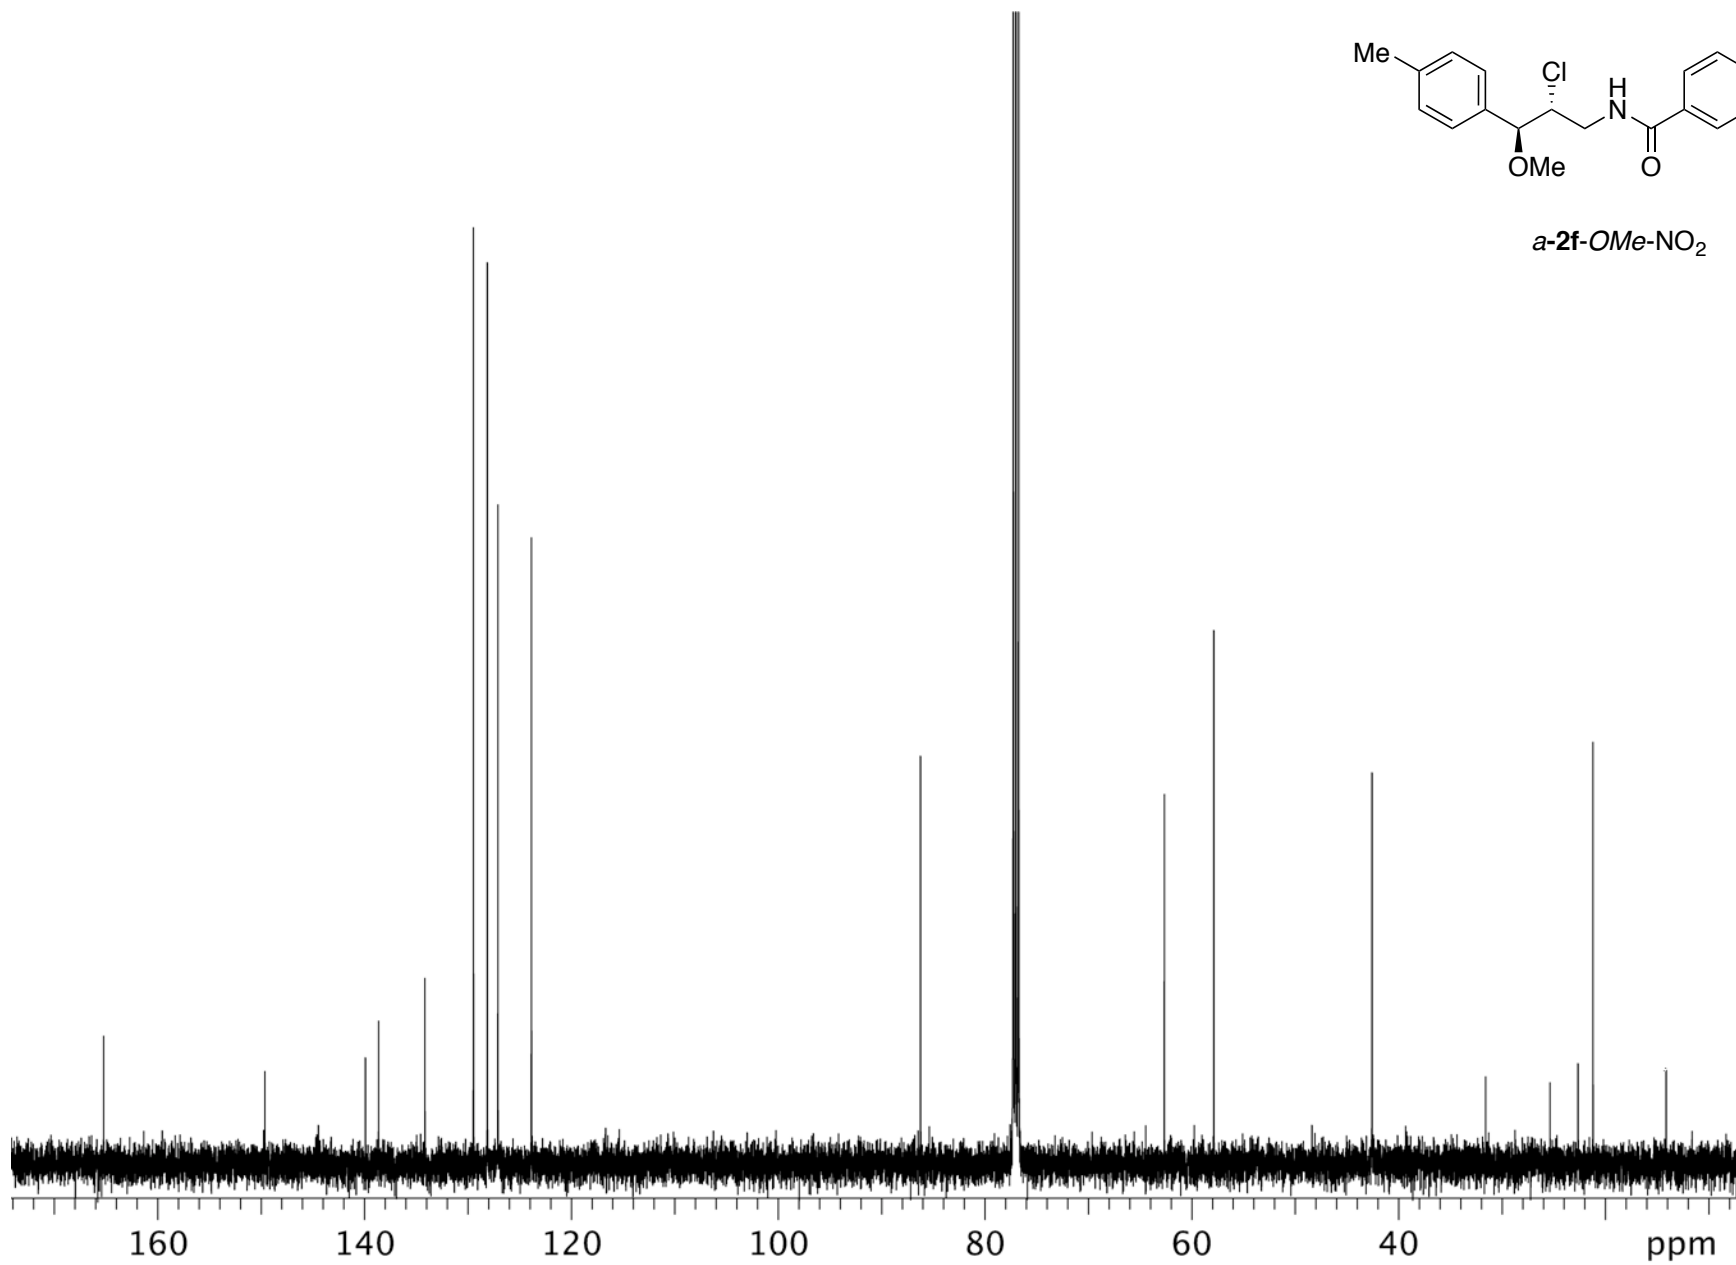

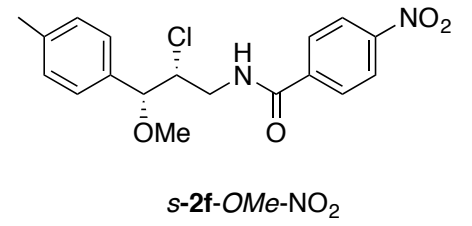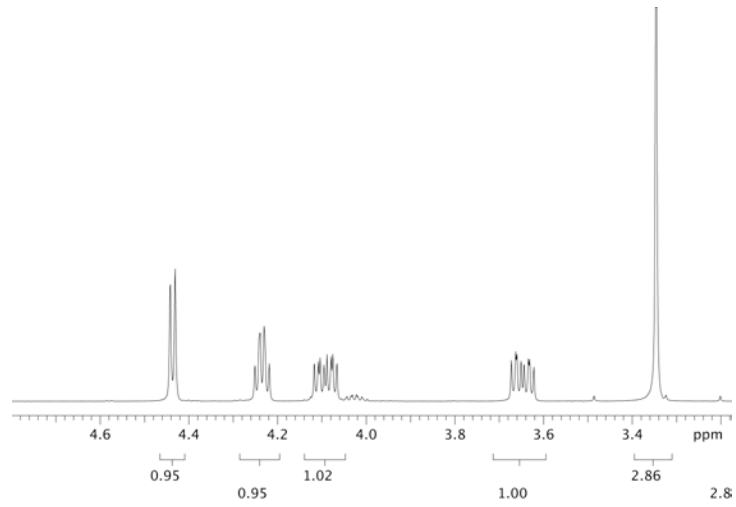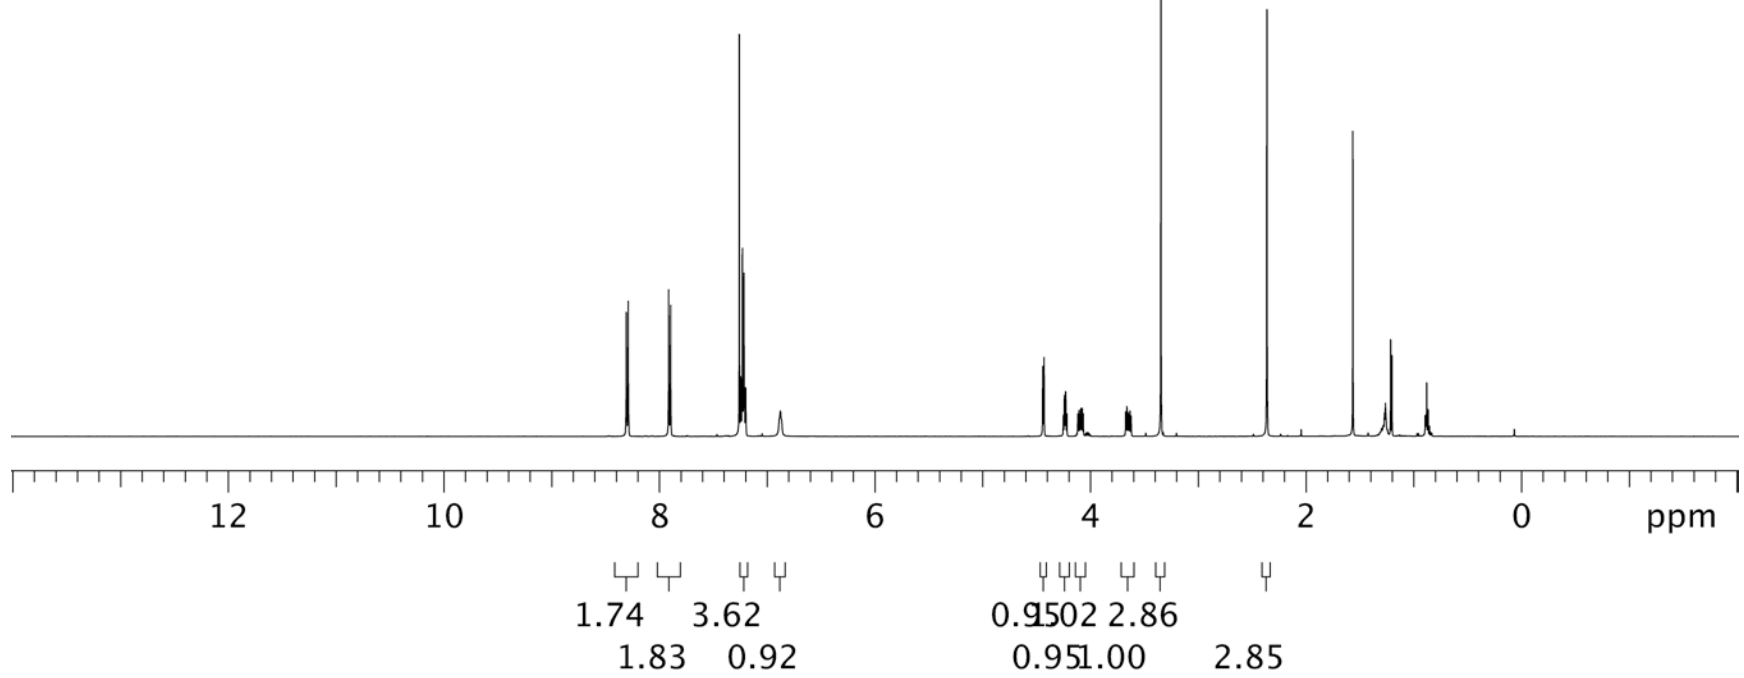

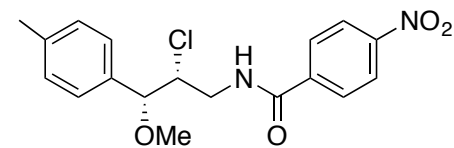

*s*-2f-OMe-NO<sub>2</sub>

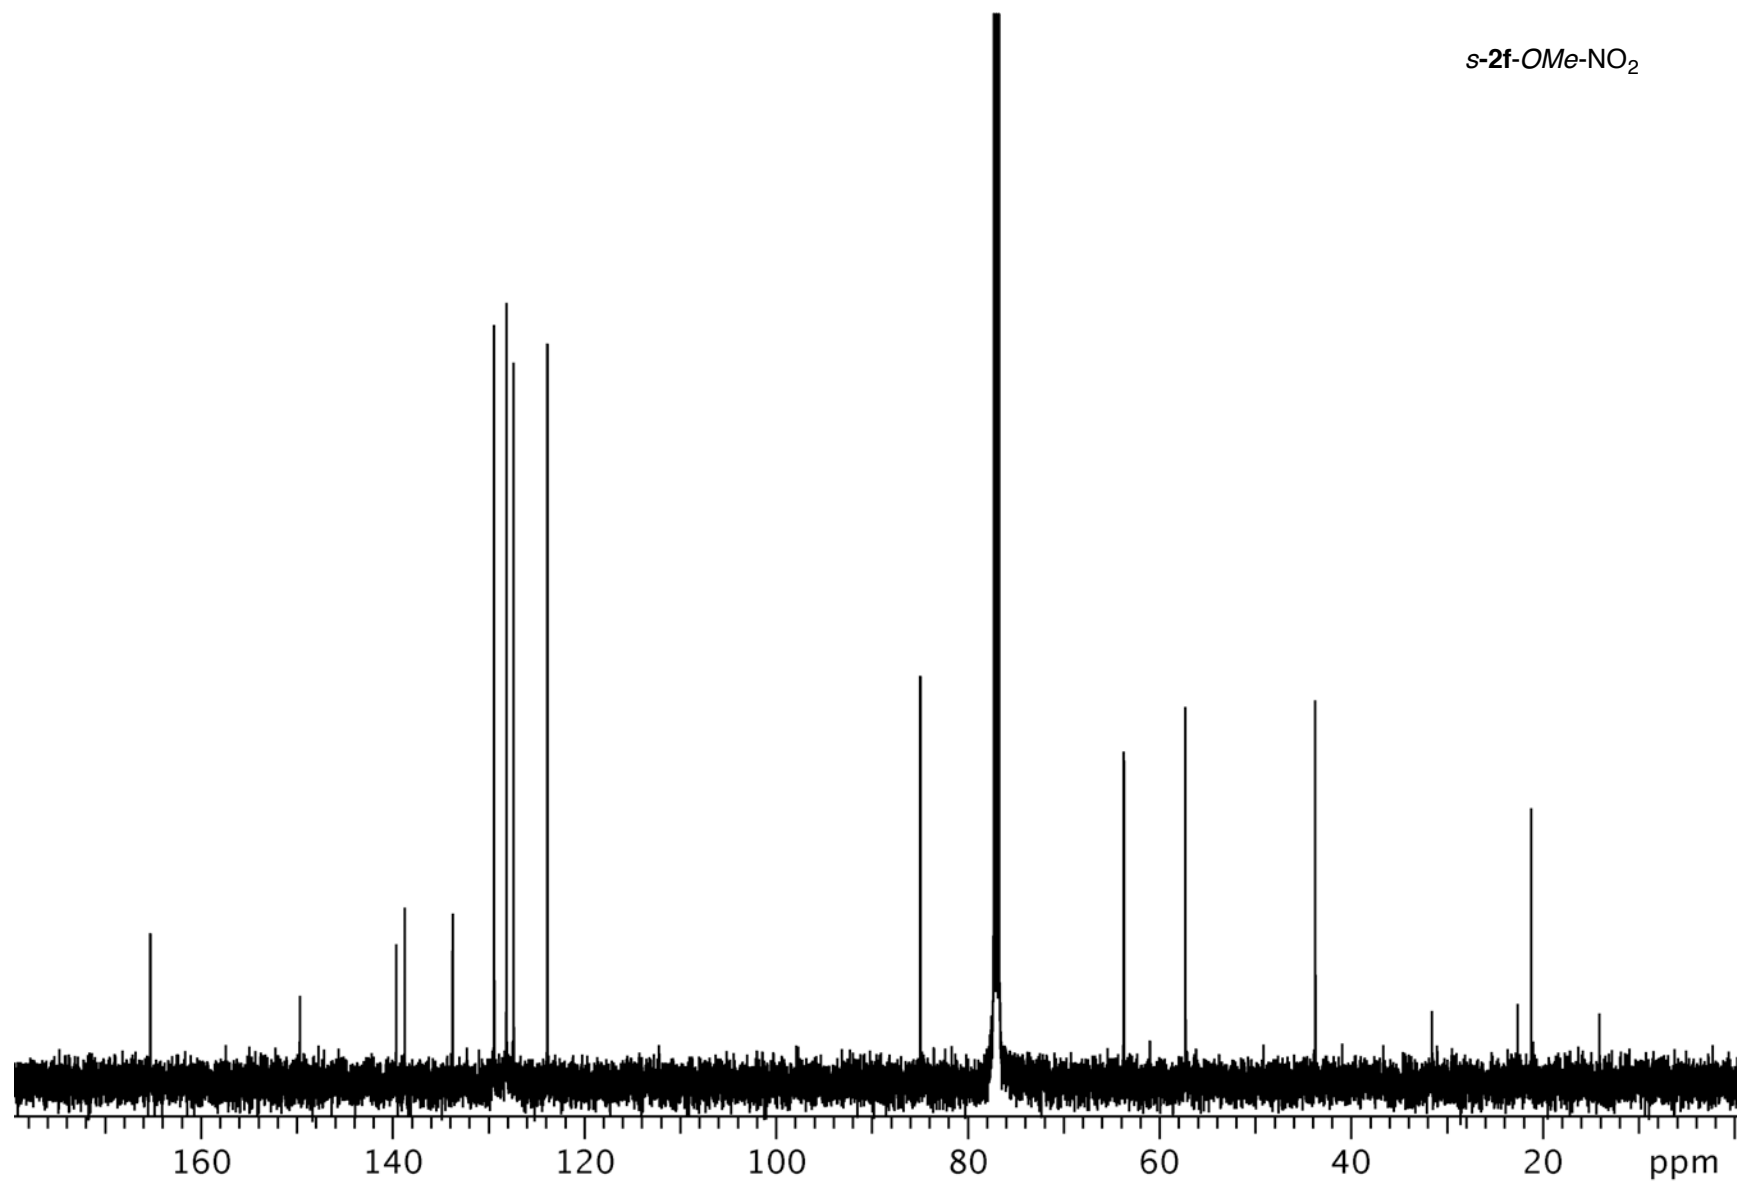

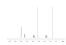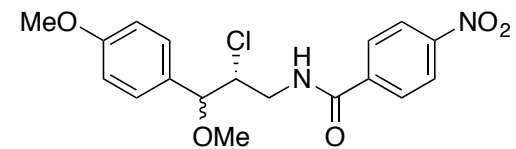

2g-OMe-NO<sub>2</sub>

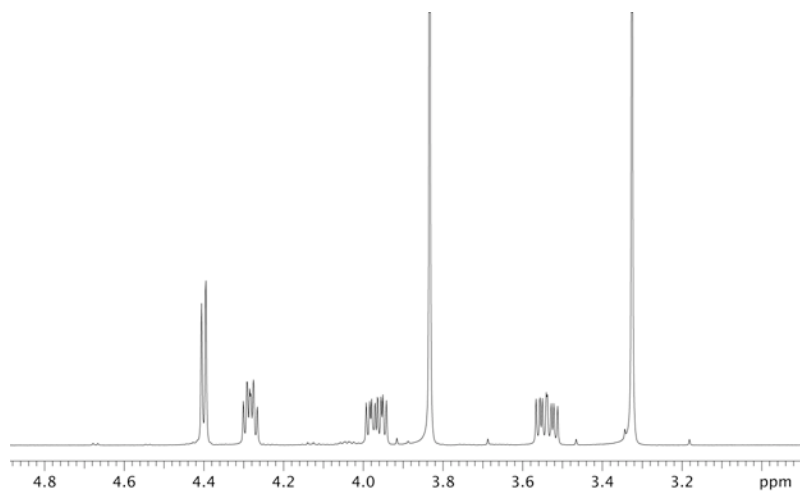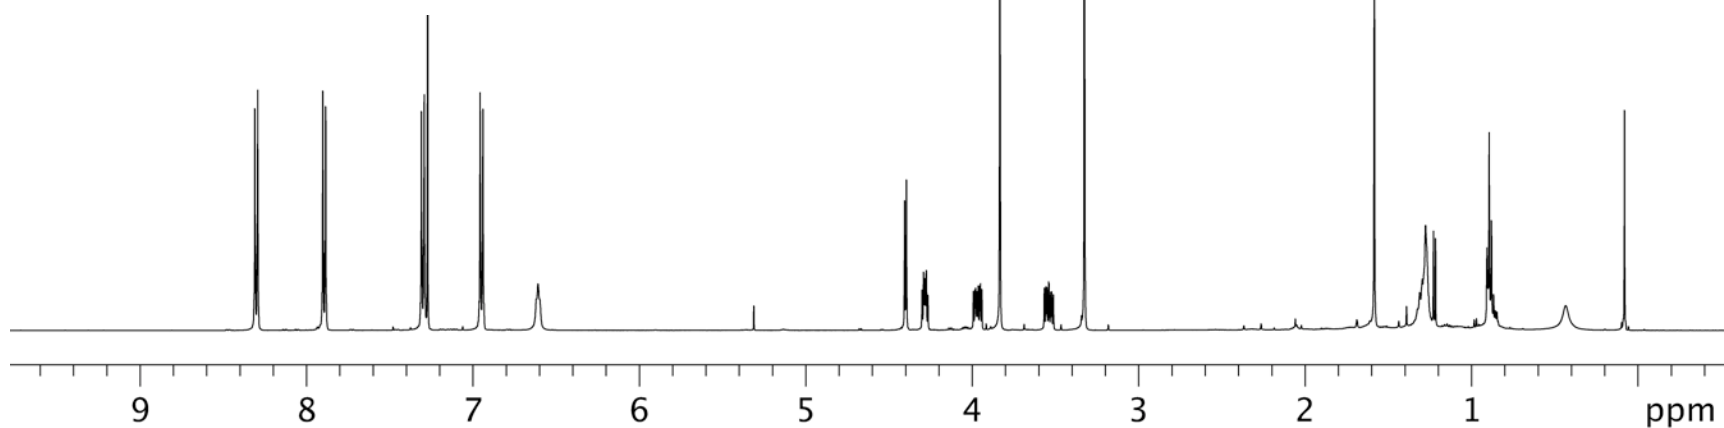

1.77 1.89  
1.92 1.84

1.00 1.07 1.03  
0.97 2.89 2.91  
S64



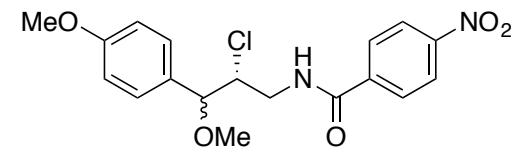

**2g-OMe-NO<sub>2</sub>**

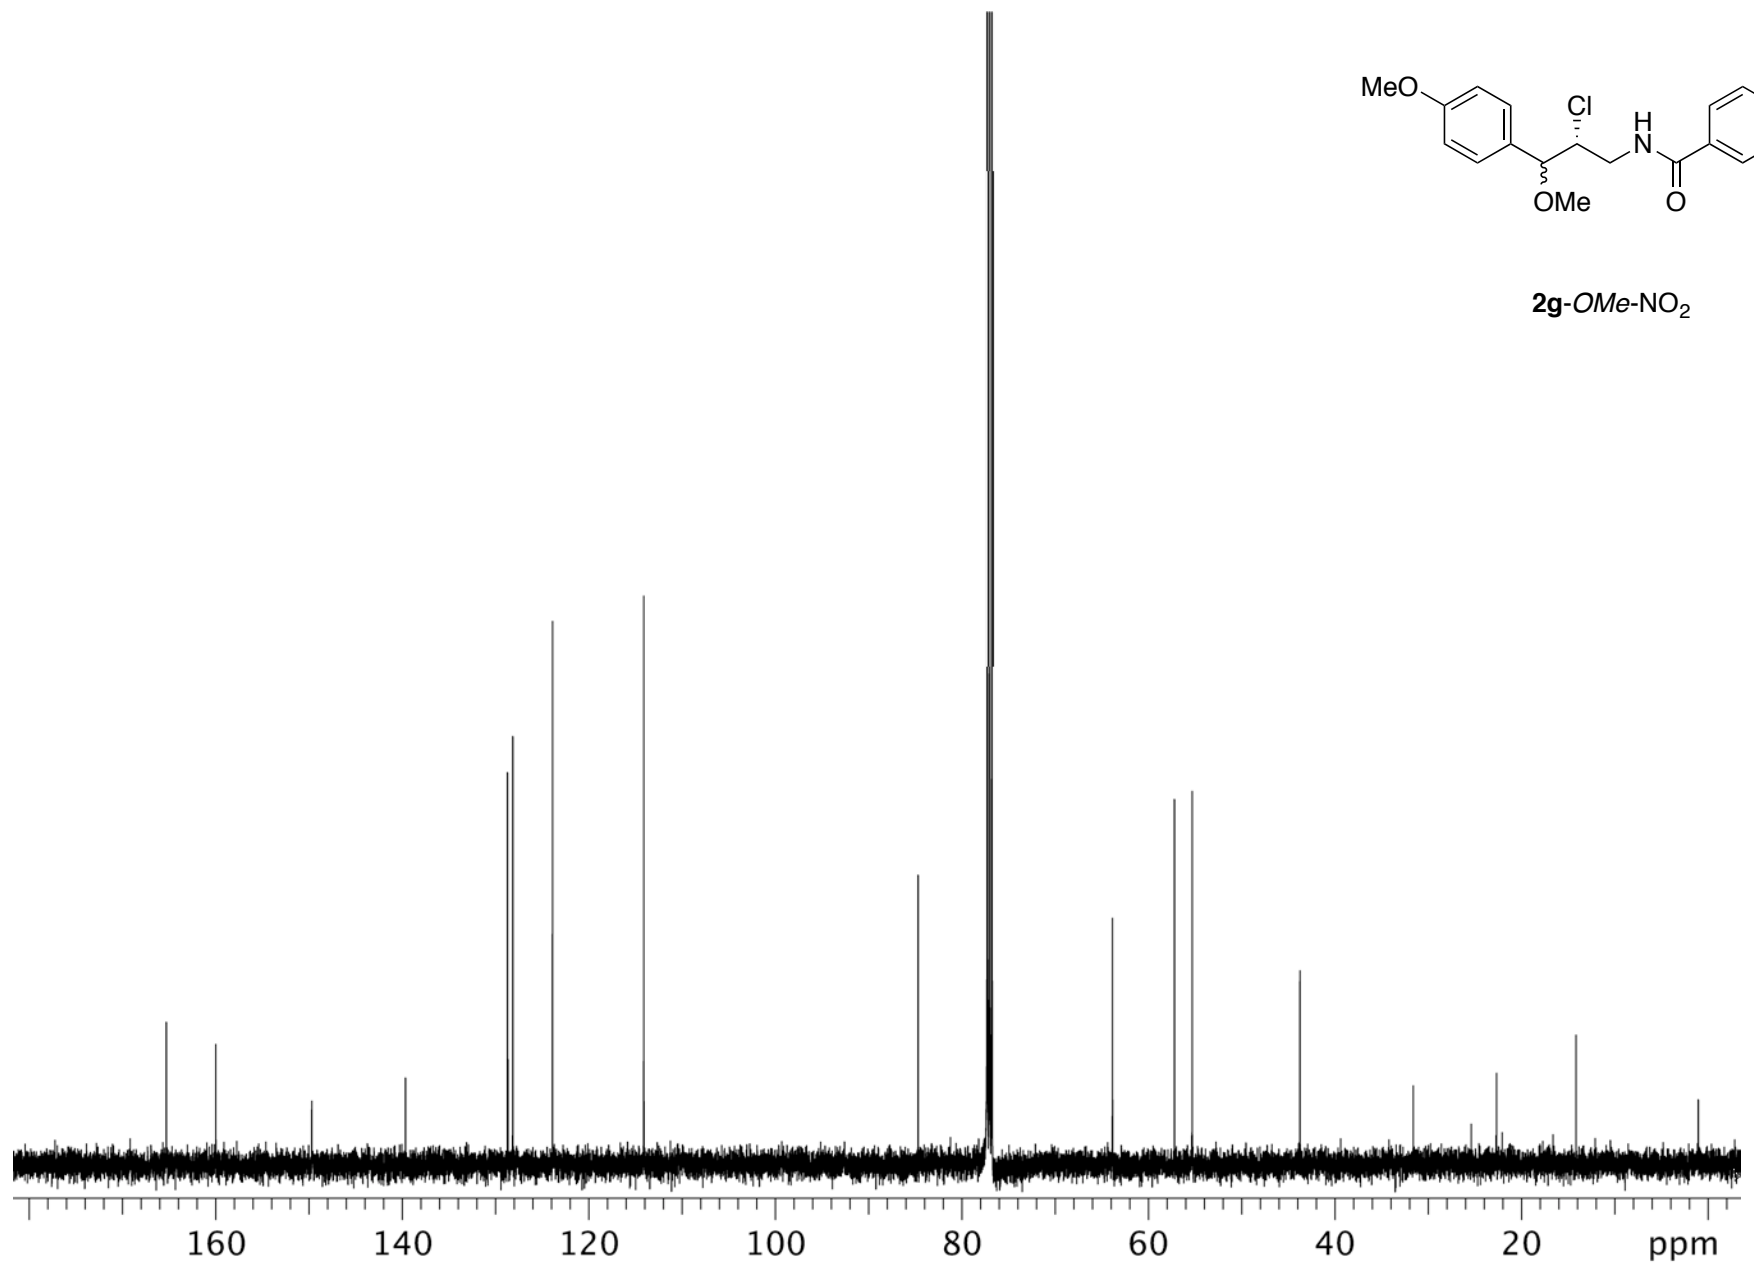

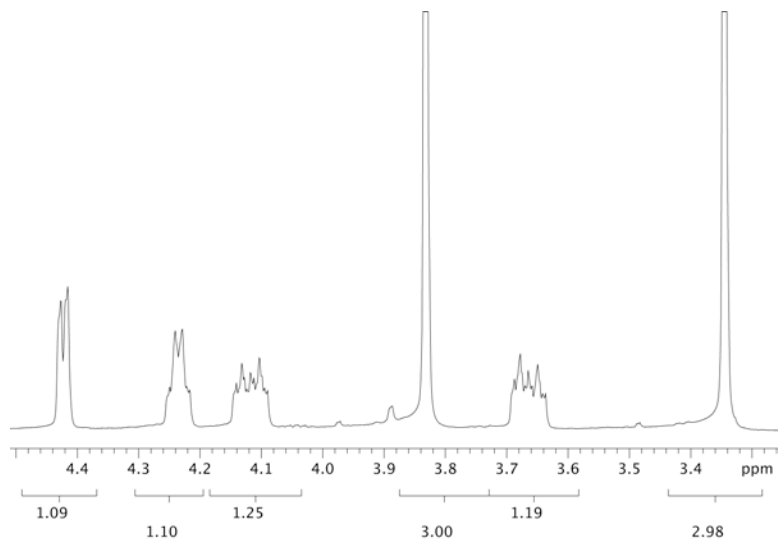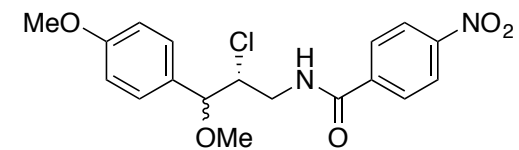

*epi-2g-OMe-NO<sub>2</sub>*

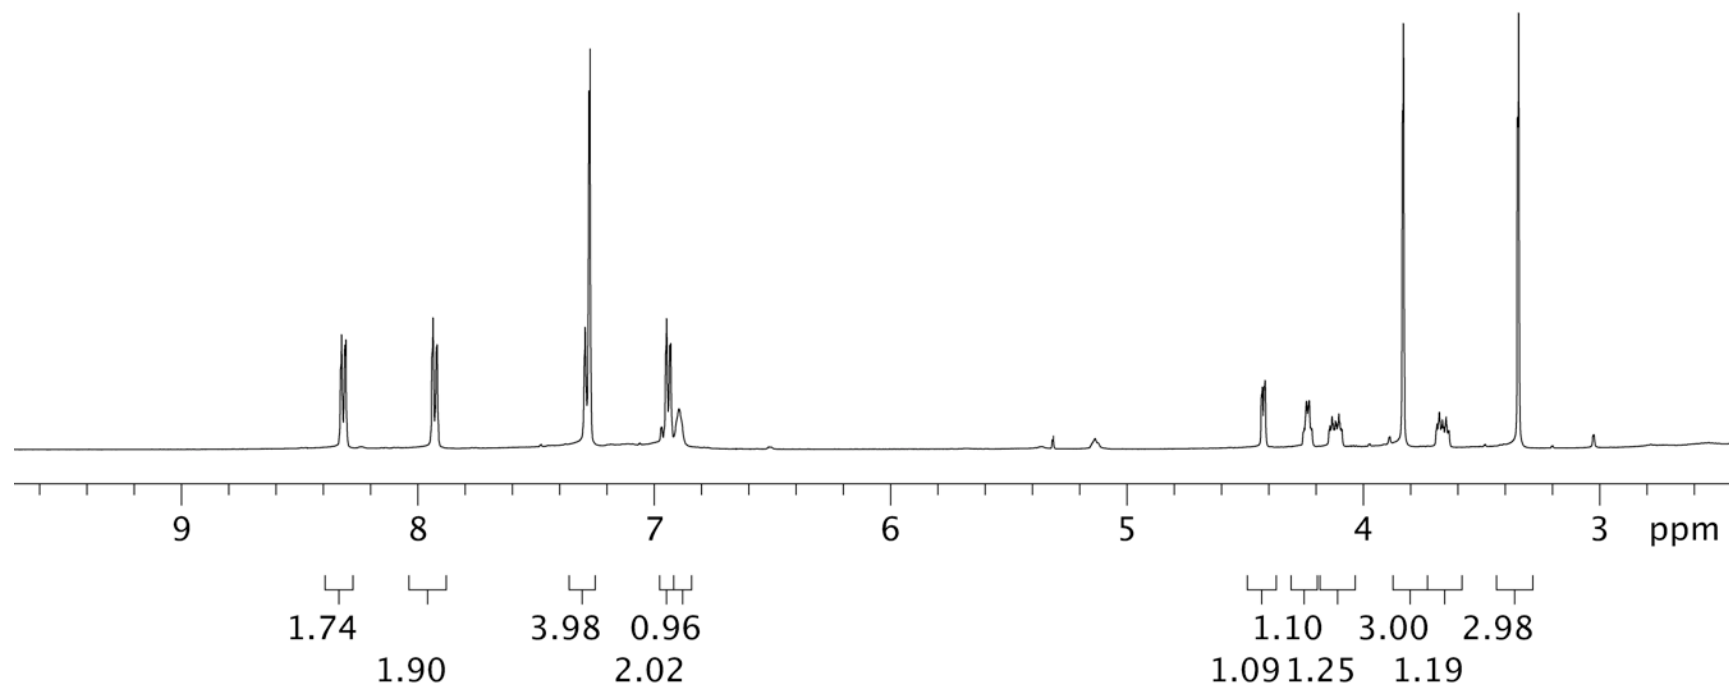

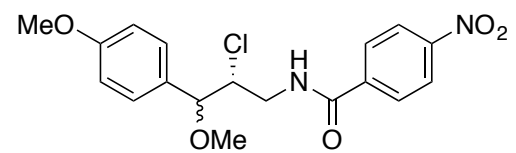

*epi-2g-OMe-NO<sub>2</sub>*

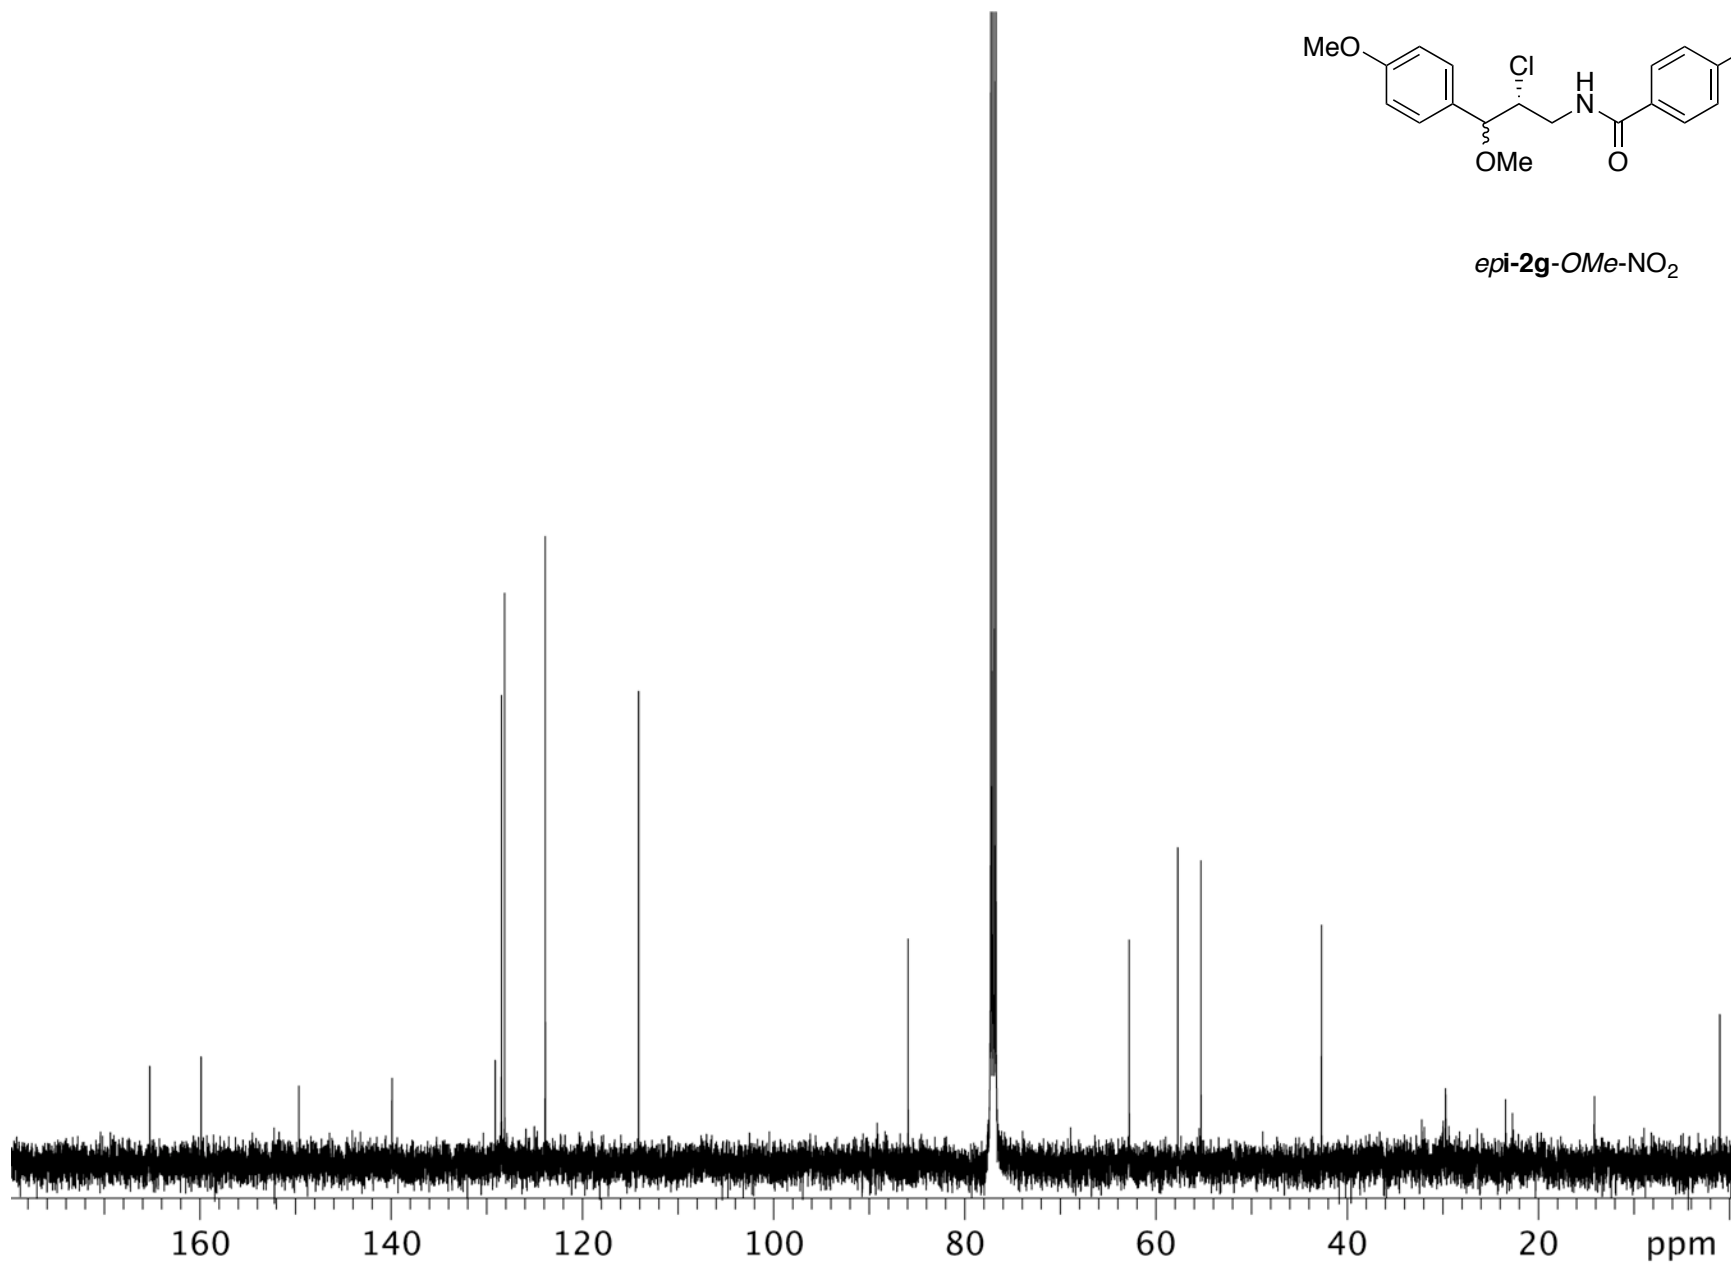

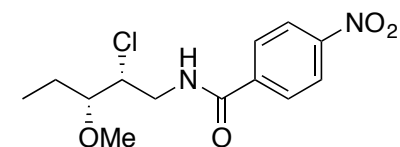

*s*-2h-OMe-NO<sub>2</sub>

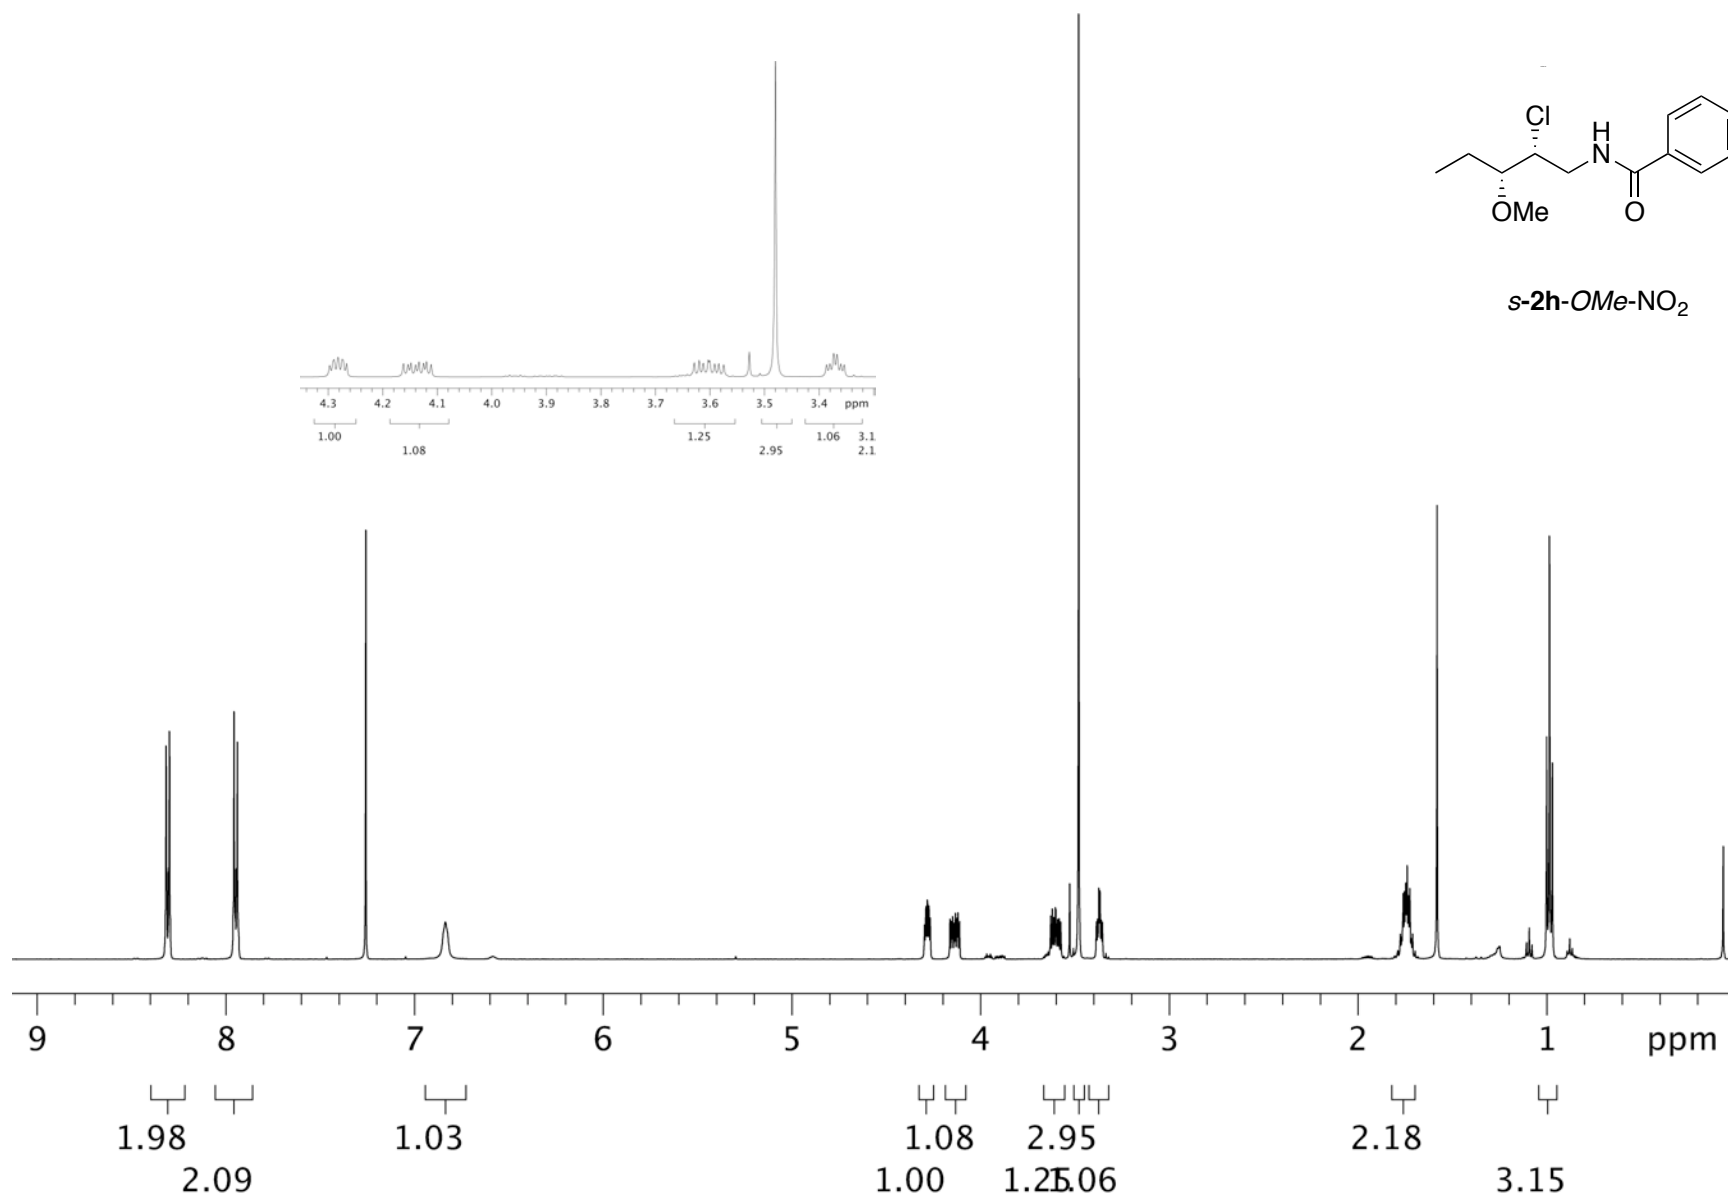

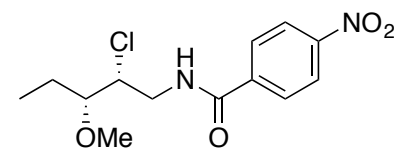

*s*-2h-OMe-NO<sub>2</sub>

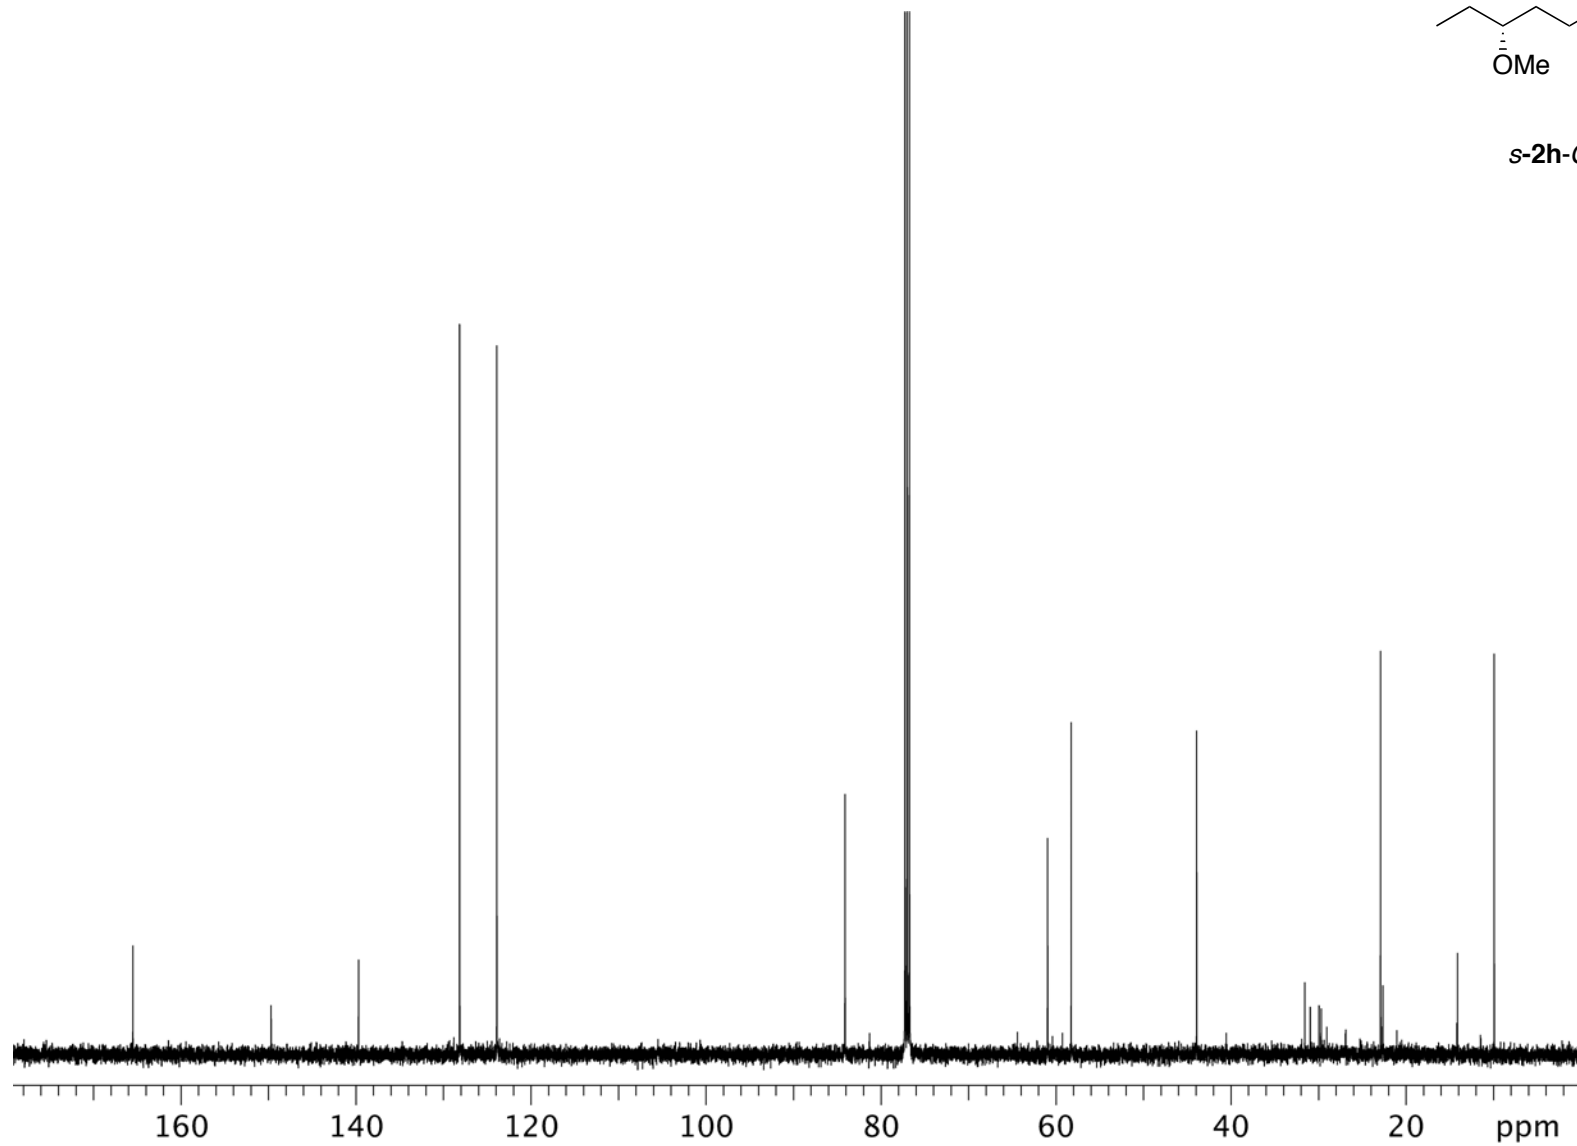

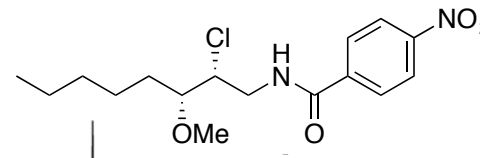

*s*-2i-OMe-NO<sub>2</sub>

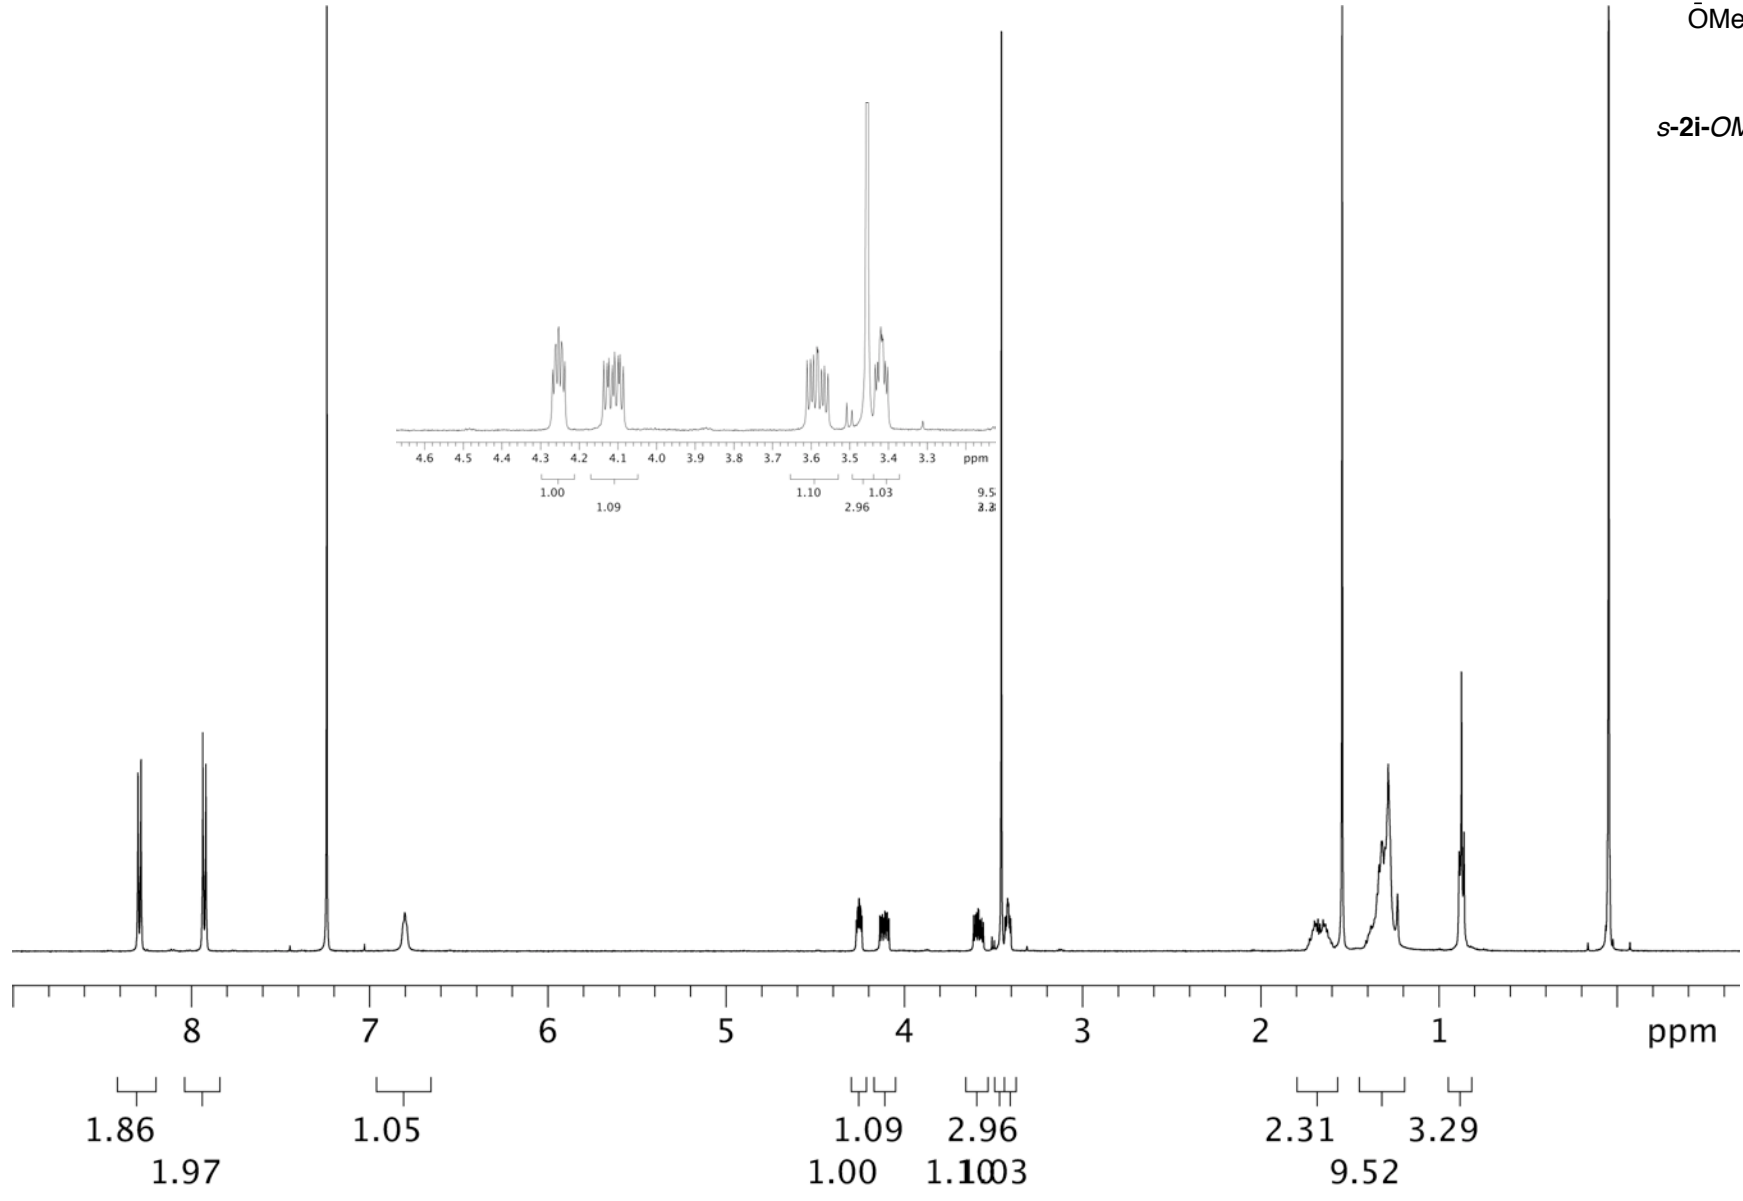

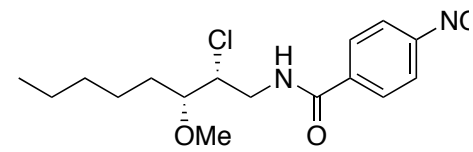

*s*-2i-OMe-NO<sub>2</sub>

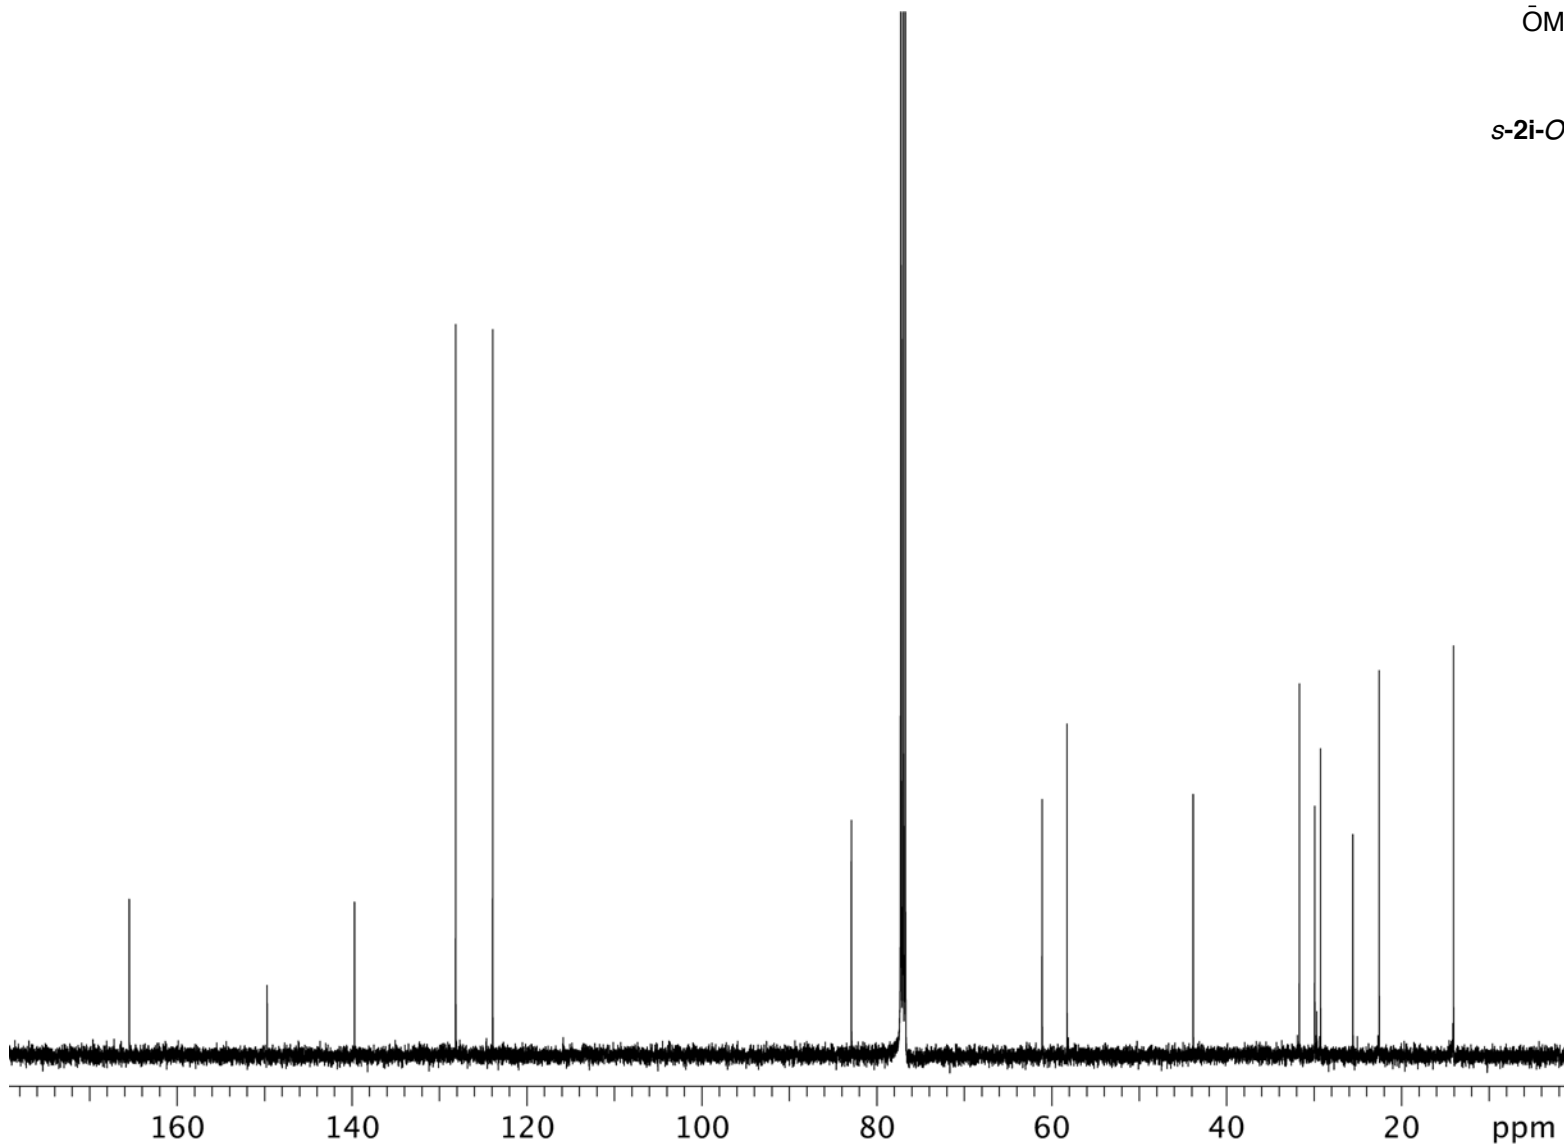

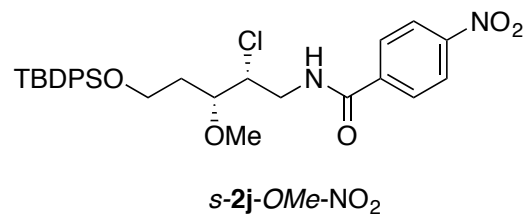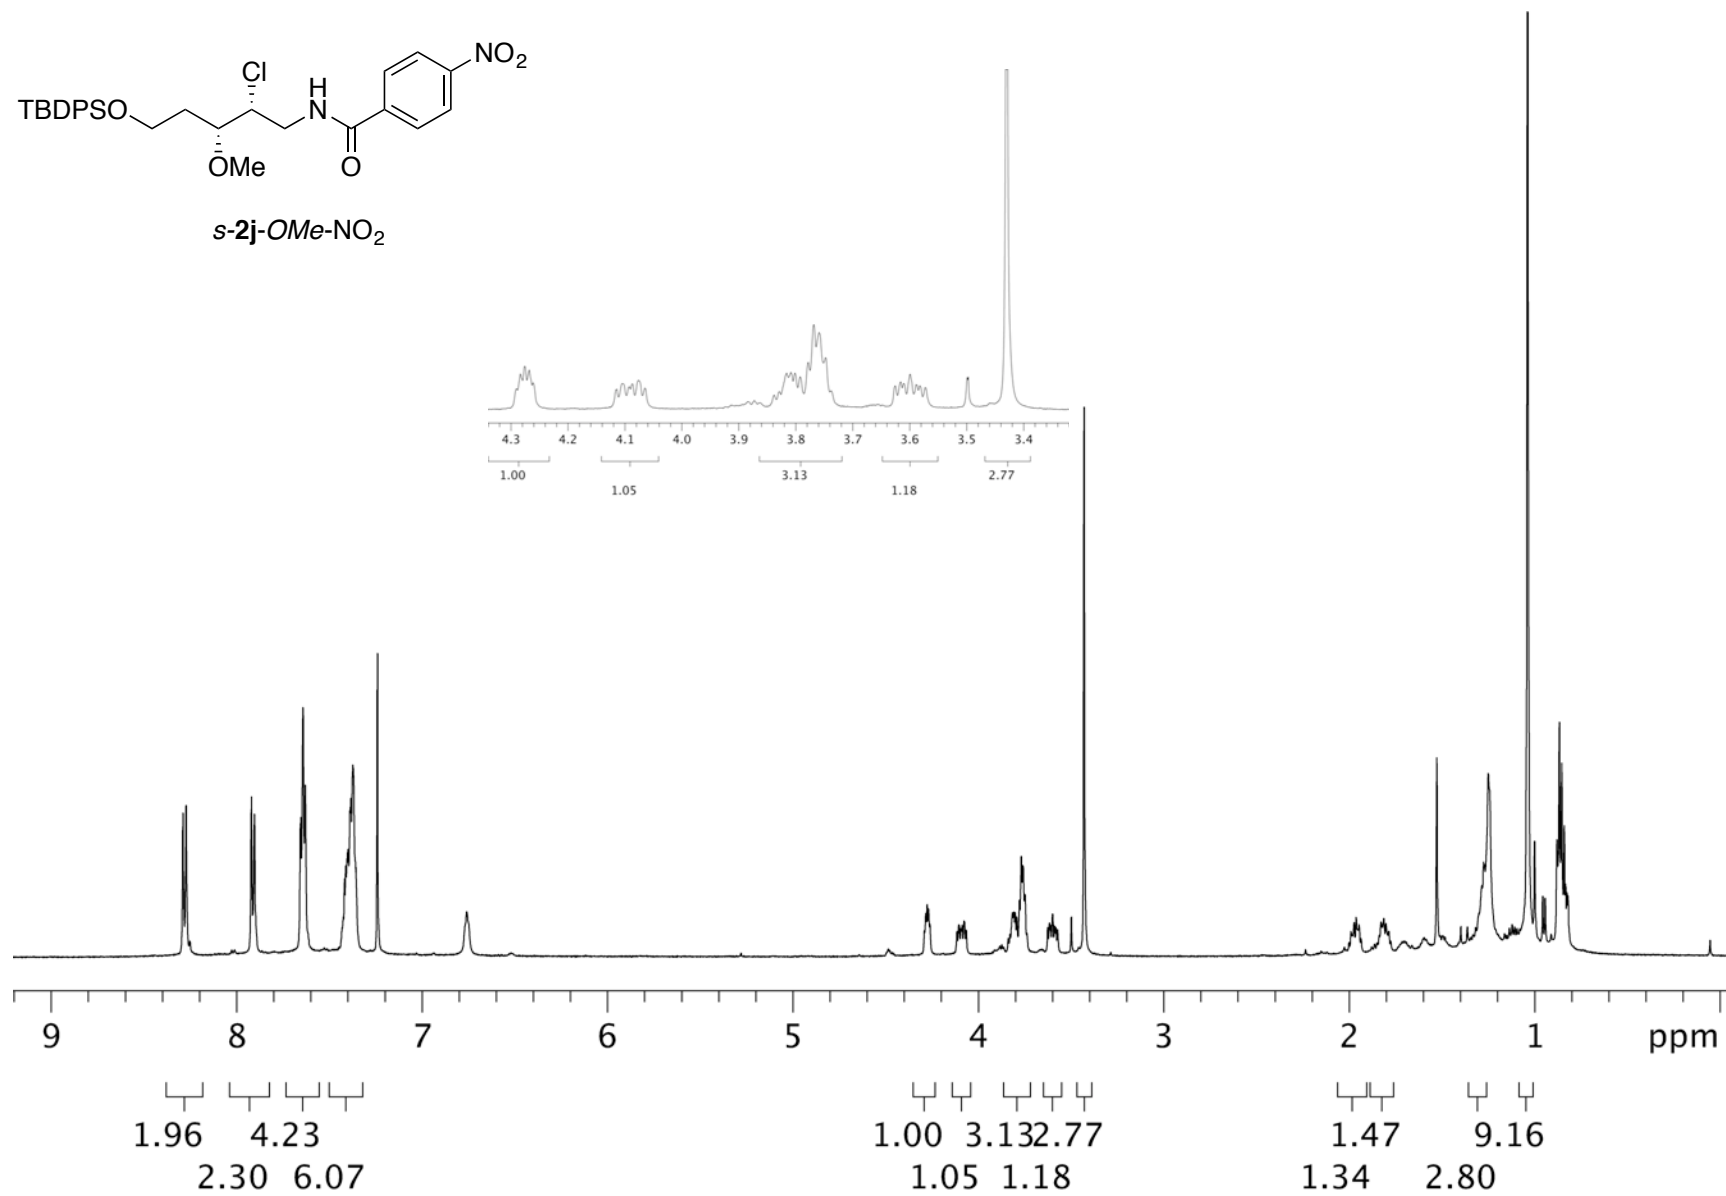



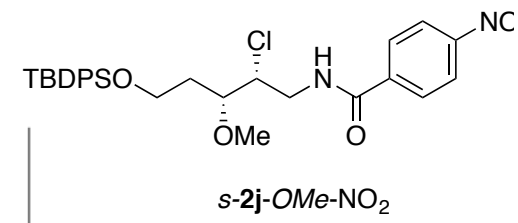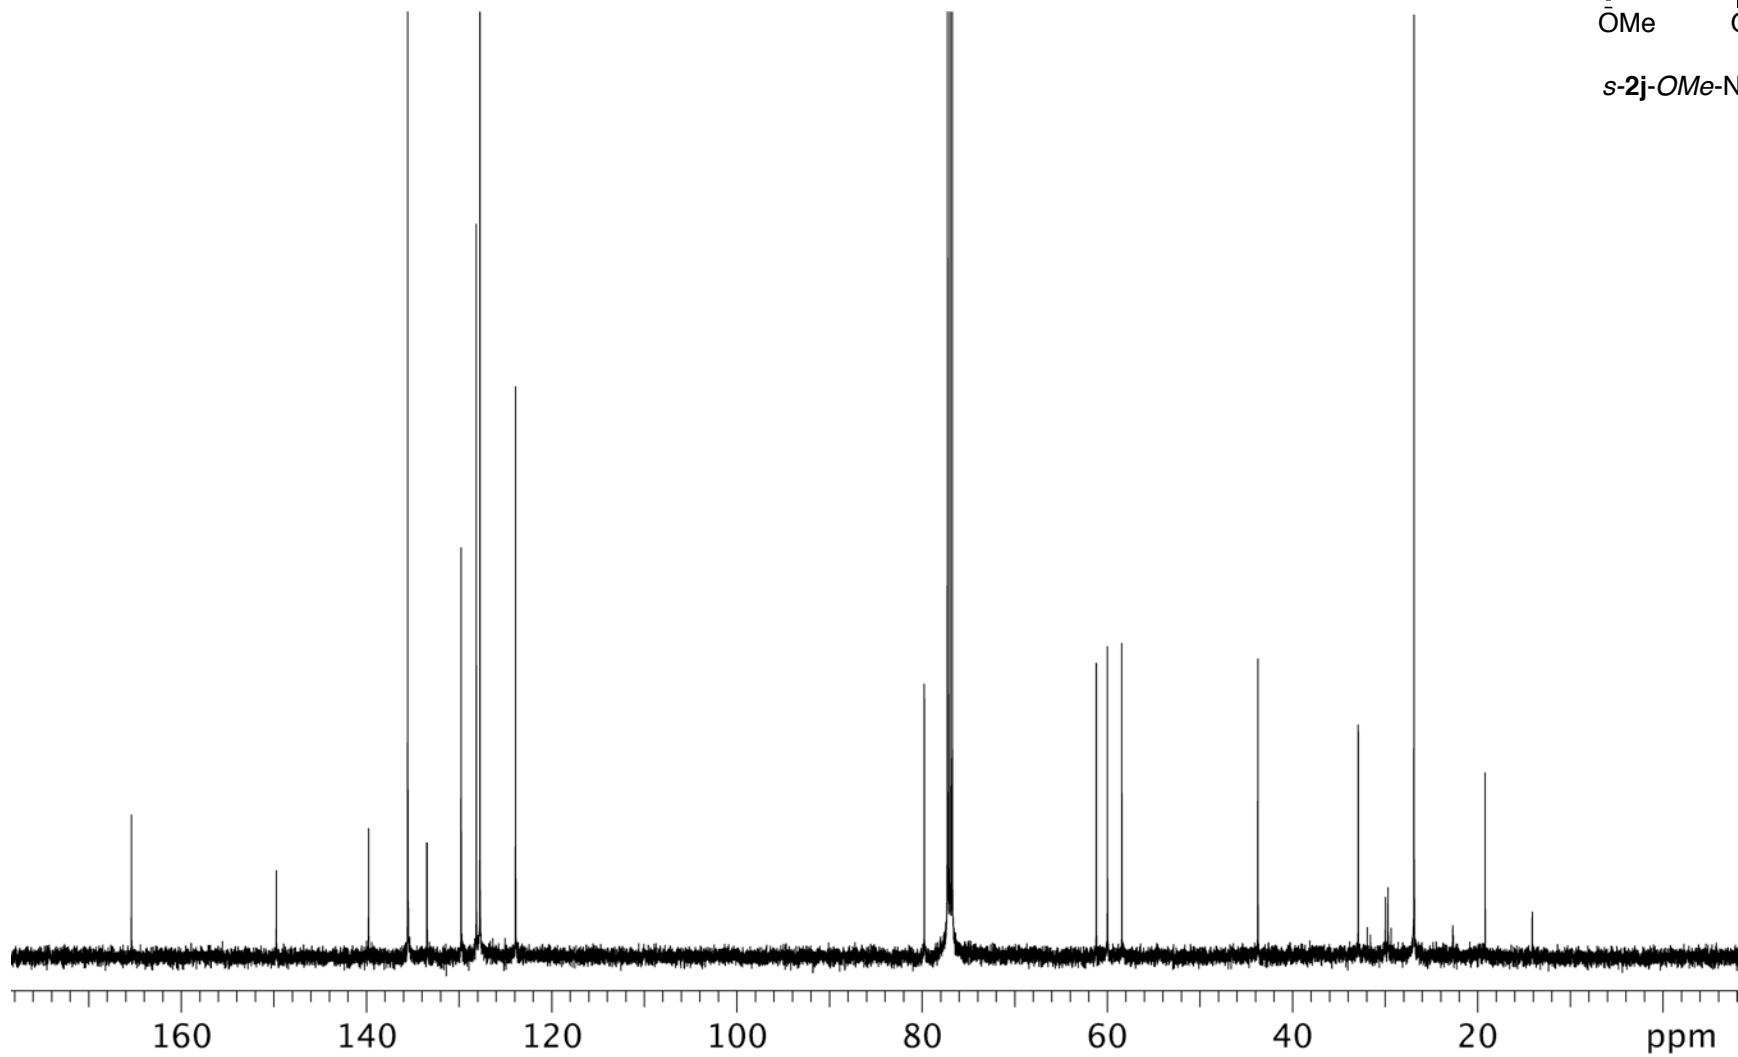

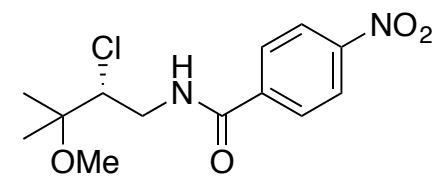

2k-OMe-NO<sub>2</sub>

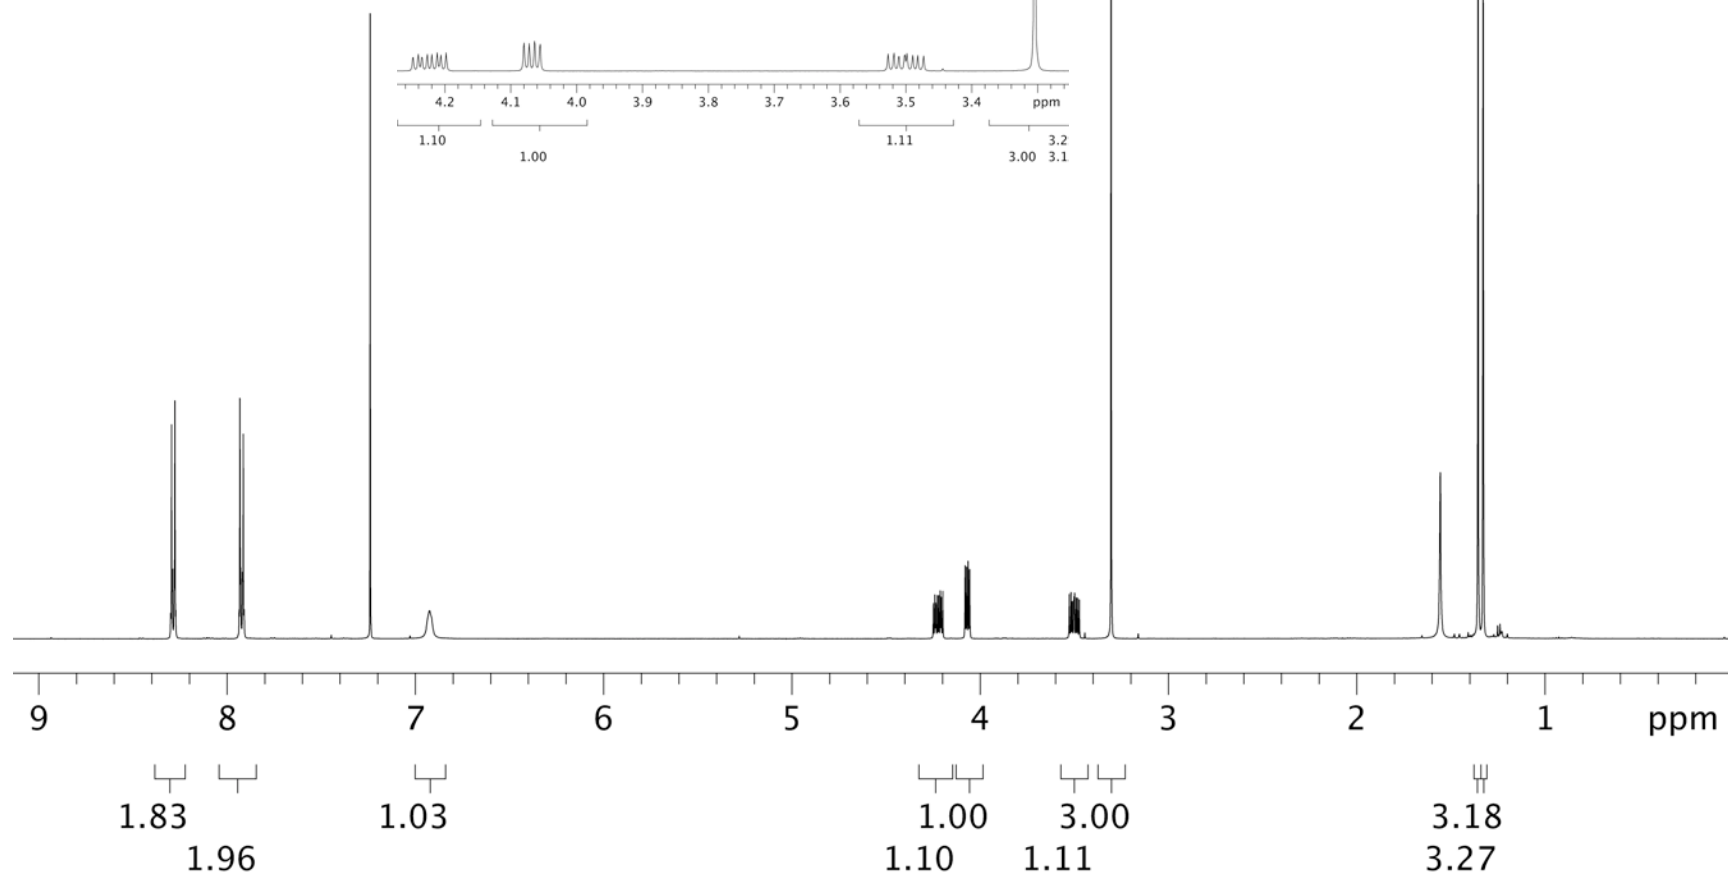

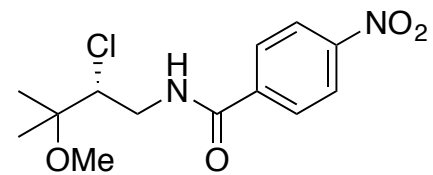

2k-OMe-NO<sub>2</sub>

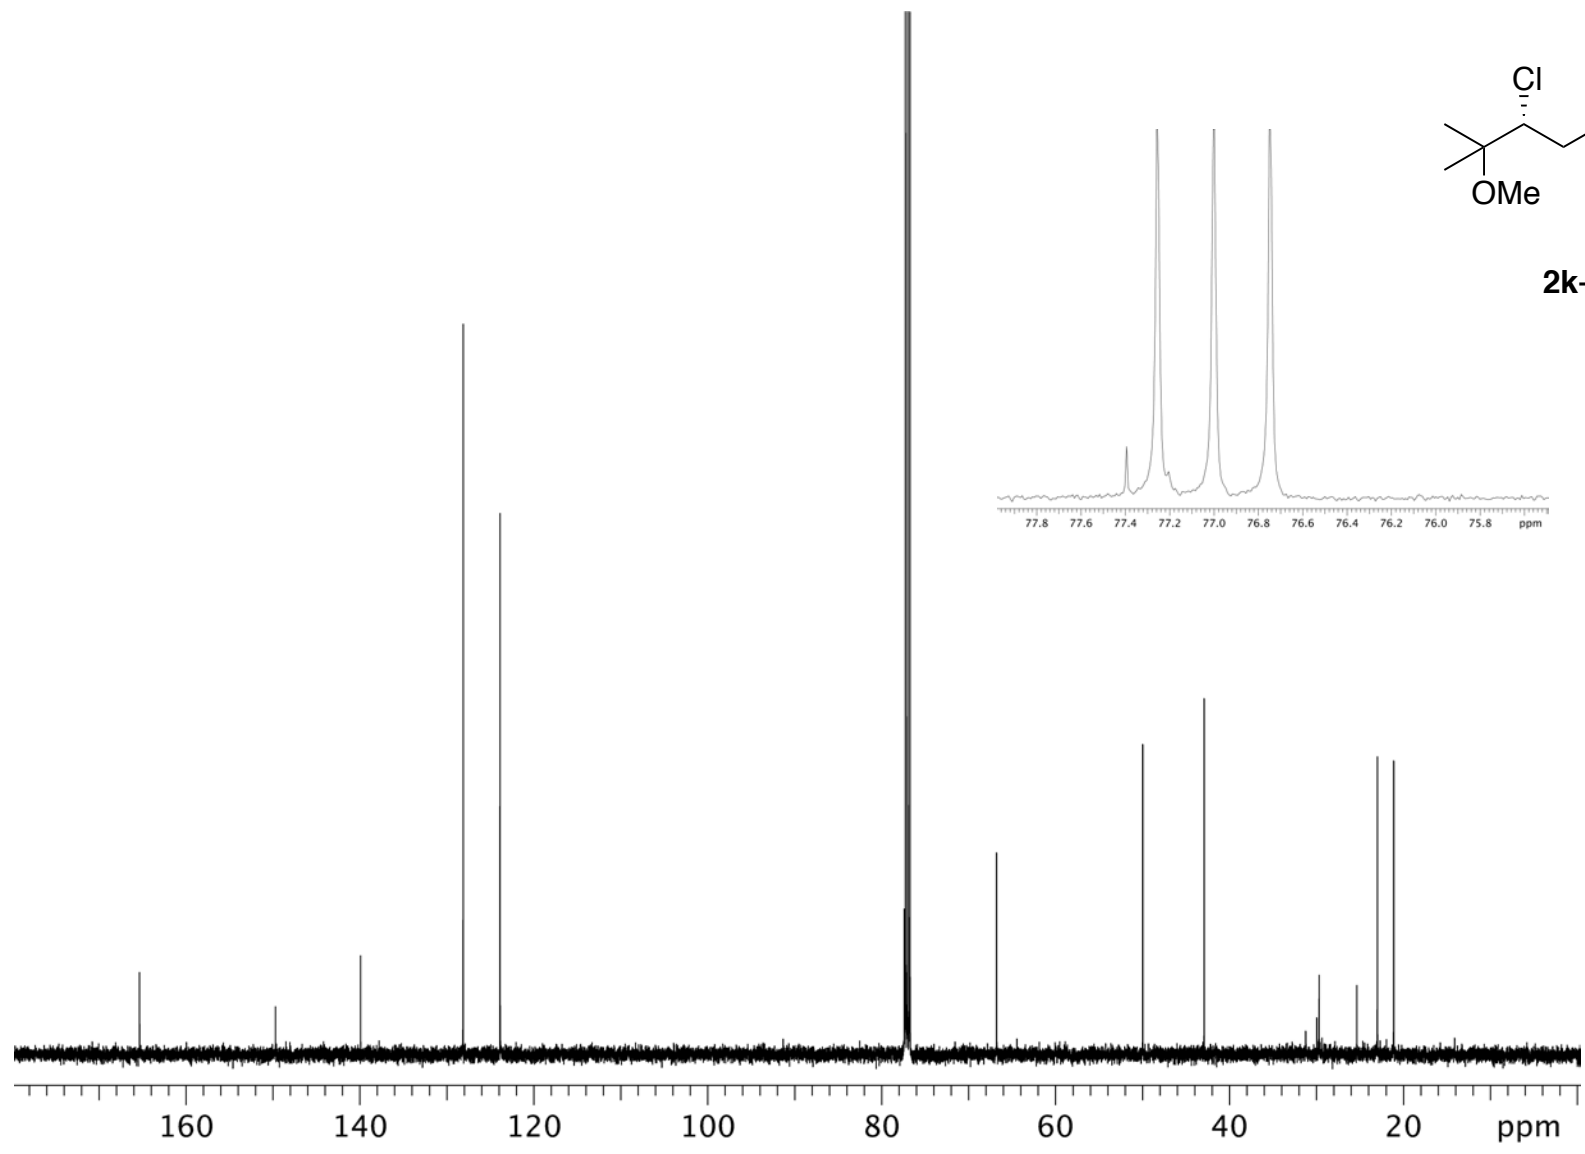

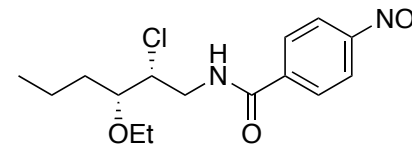

*s*-2c-OEt-NO<sub>2</sub>

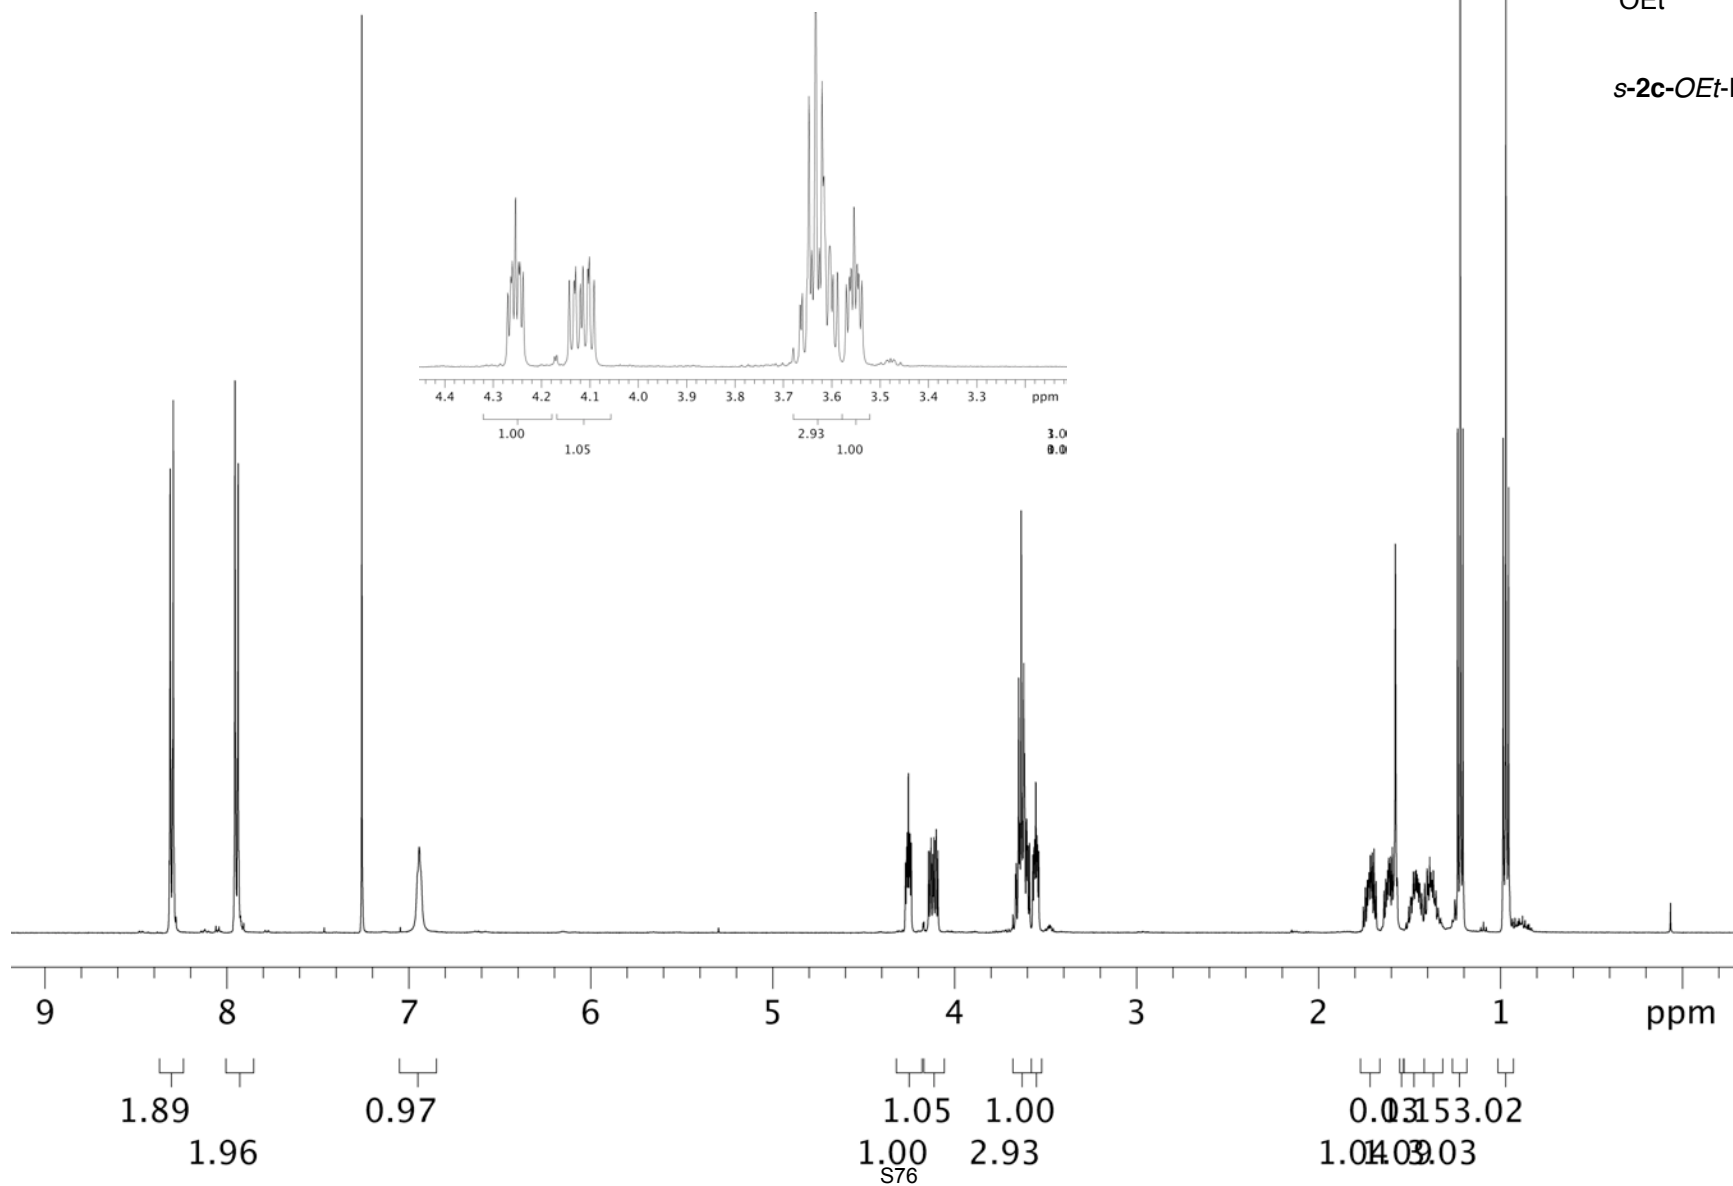

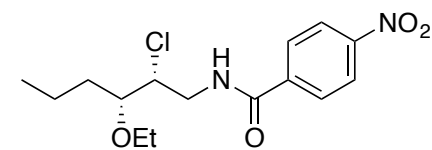

*s*-2c-OEt-NO<sub>2</sub>

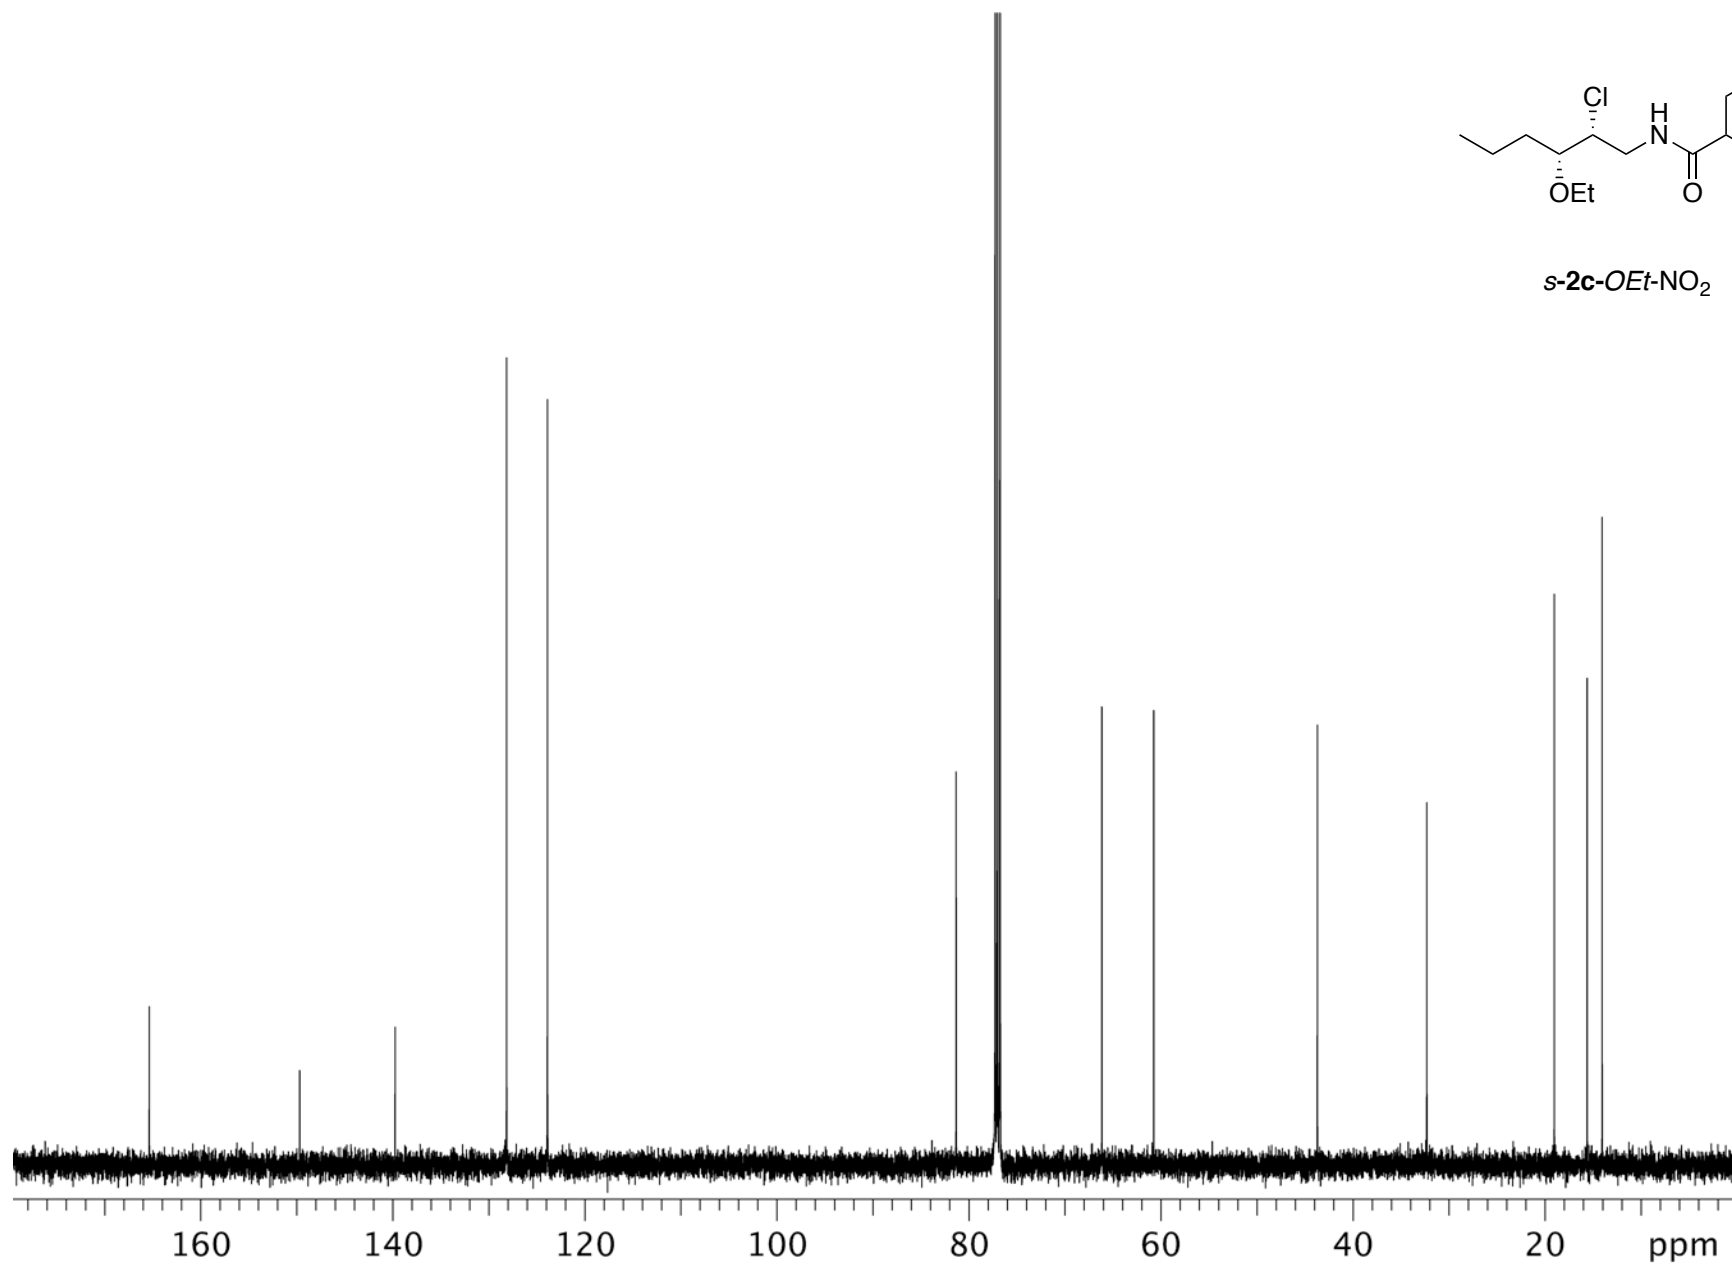

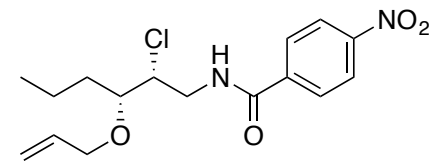

*s*-2c-OAllyl-NO<sub>2</sub>

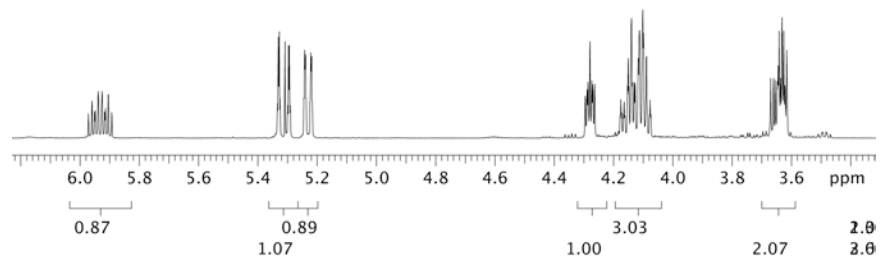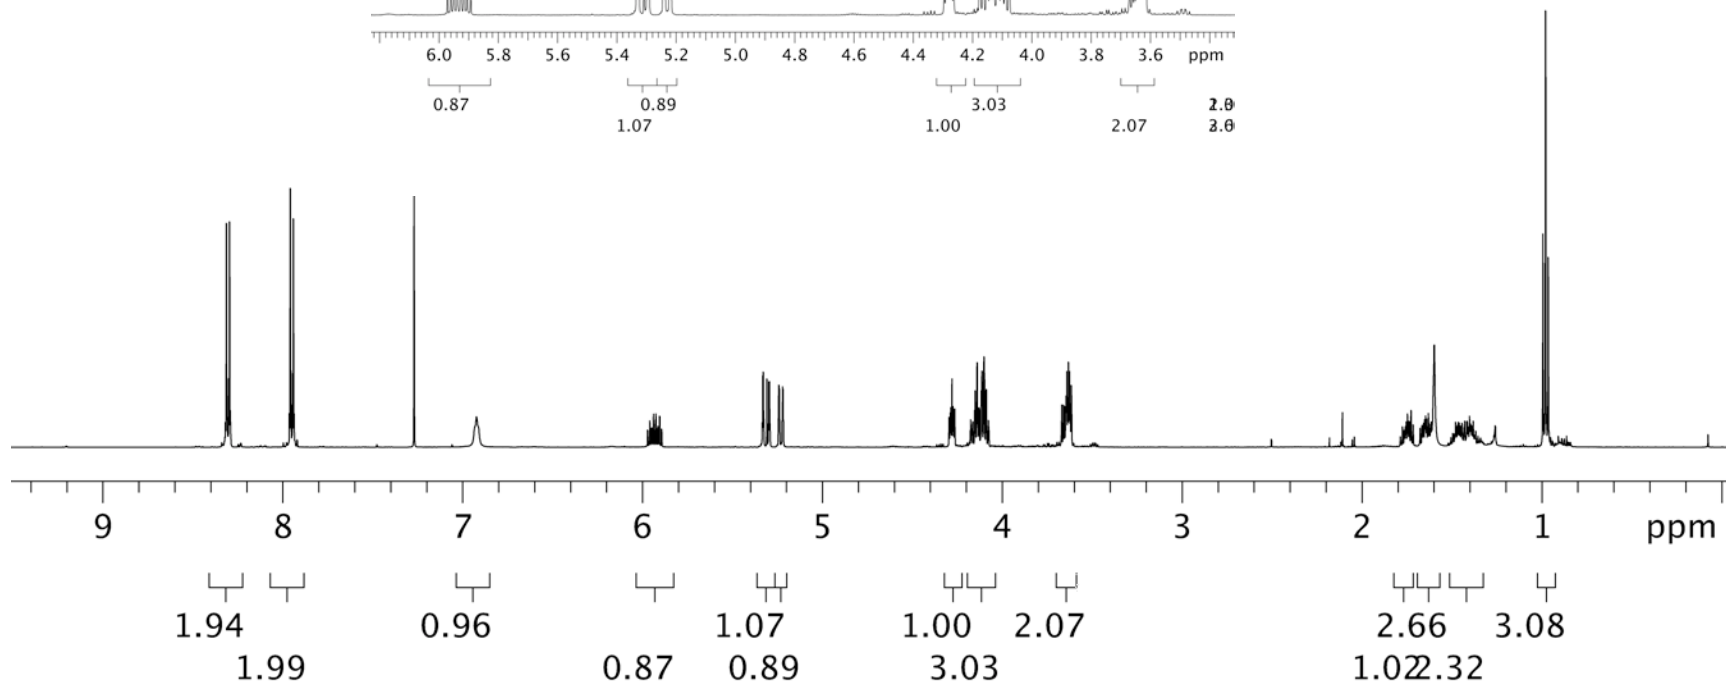

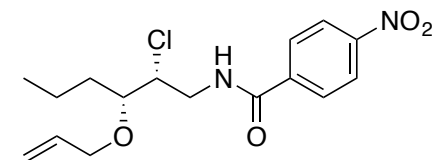

*s*-2c-OAllyl-NO<sub>2</sub>

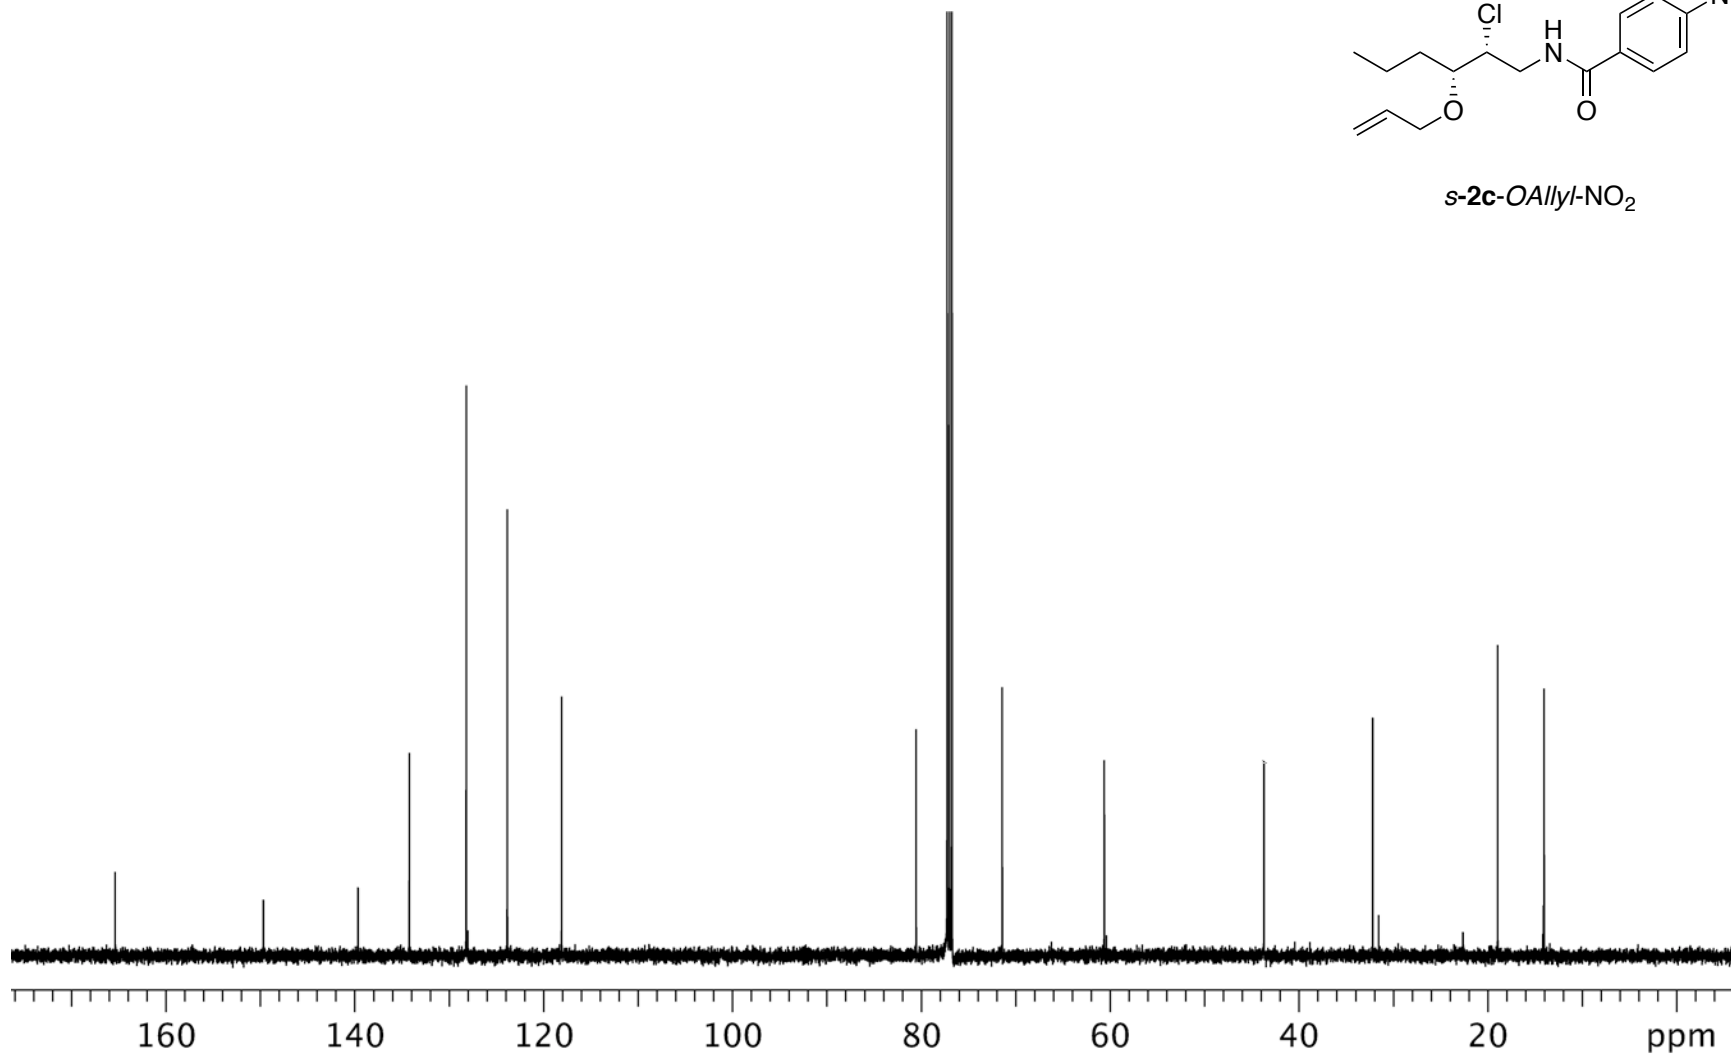

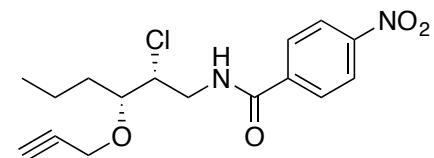

*s*-2c-OPropargyl-NO<sub>2</sub>

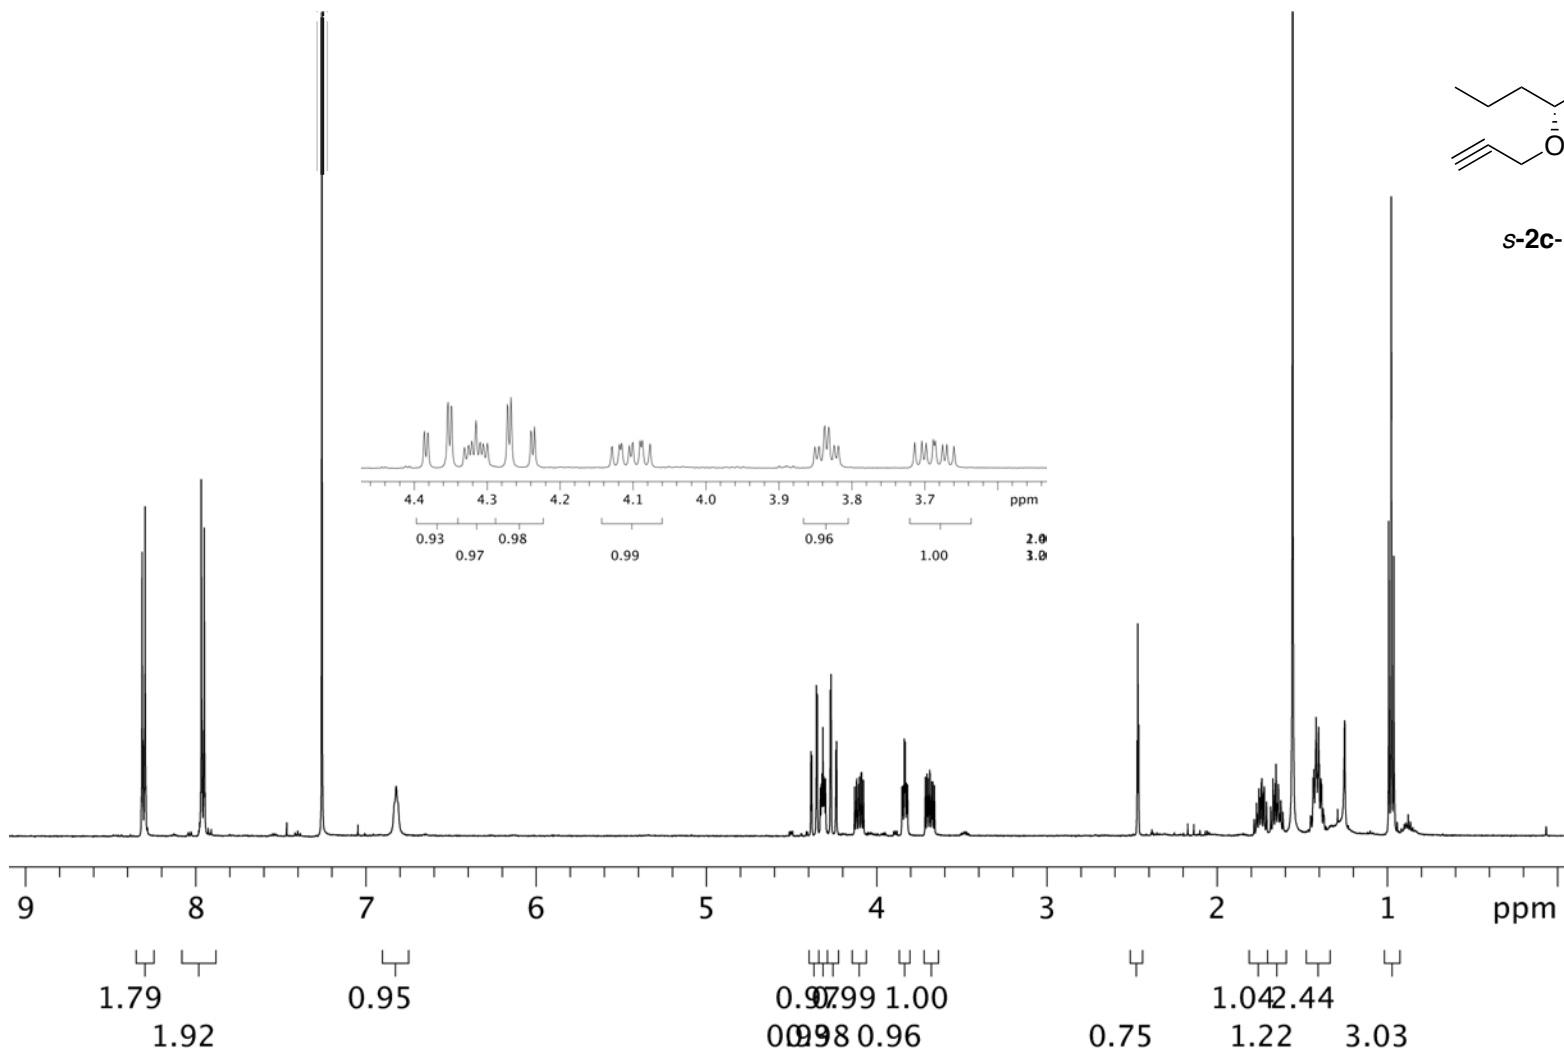



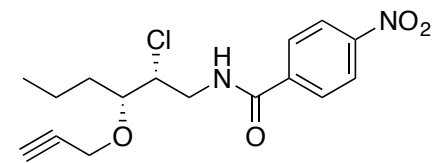

*s-2c-OPropargyl-NO<sub>2</sub>*

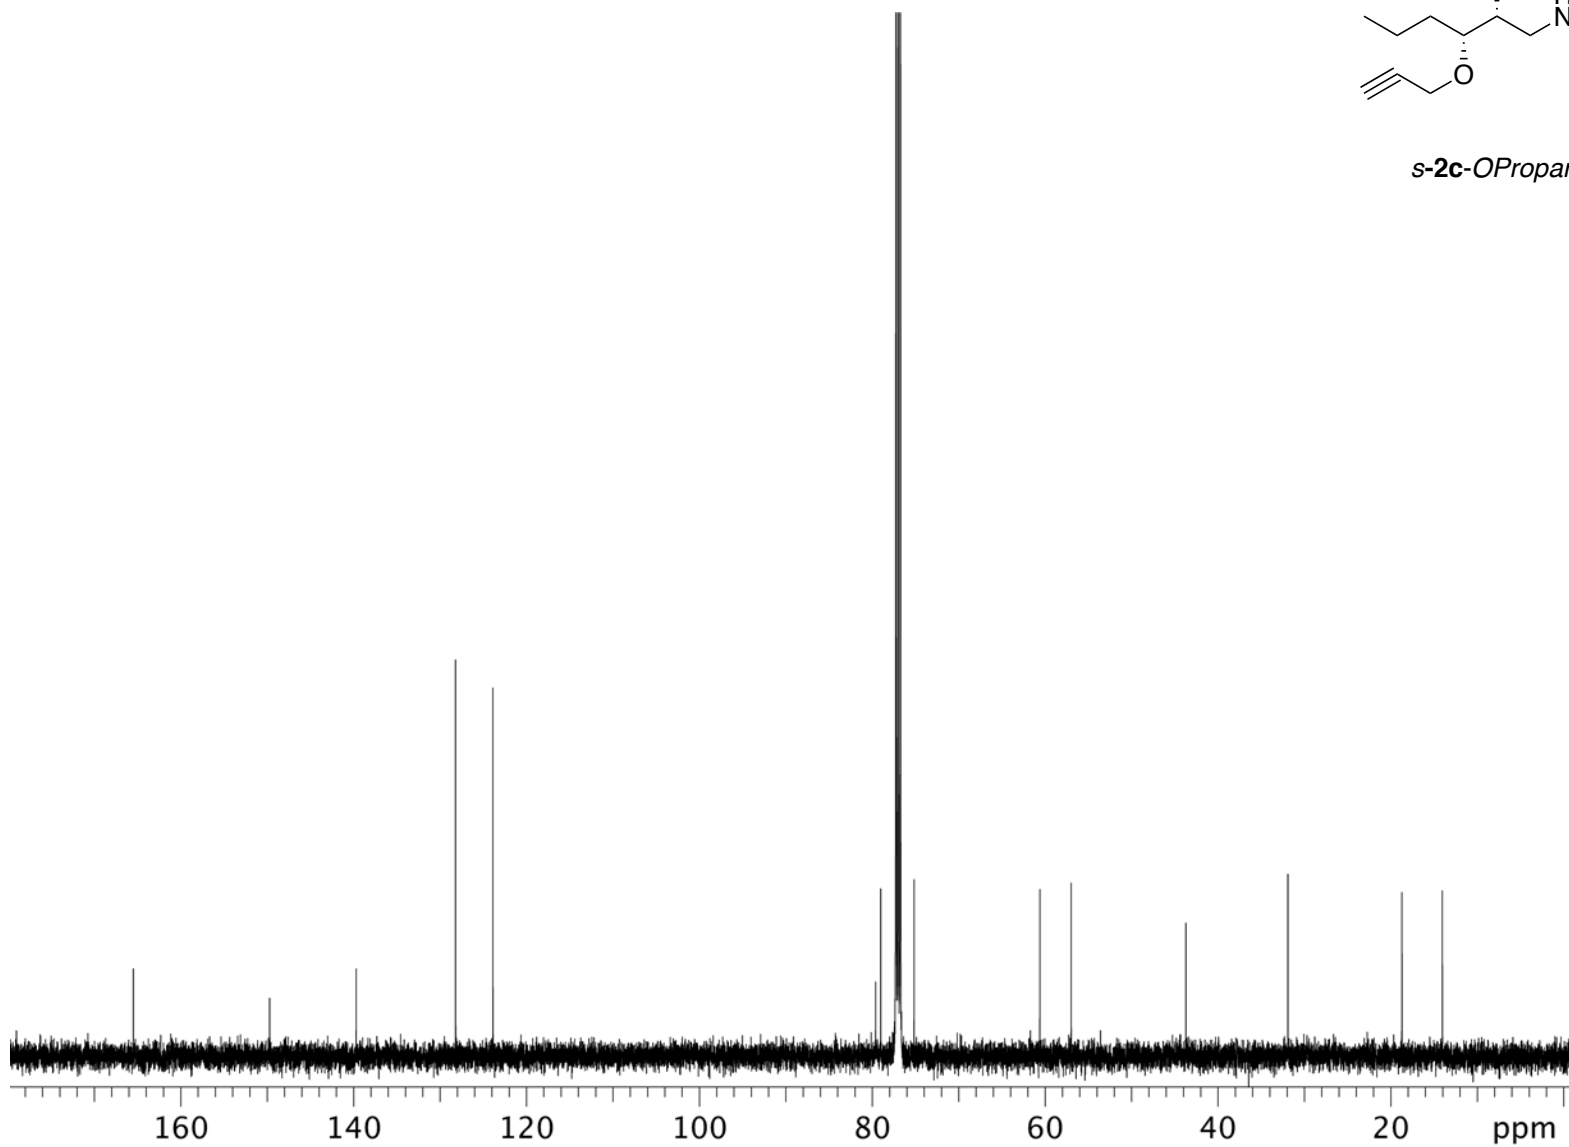

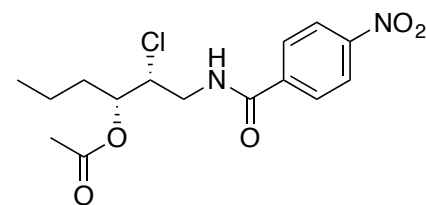

*s-2c-OAc-NO<sub>2</sub>*

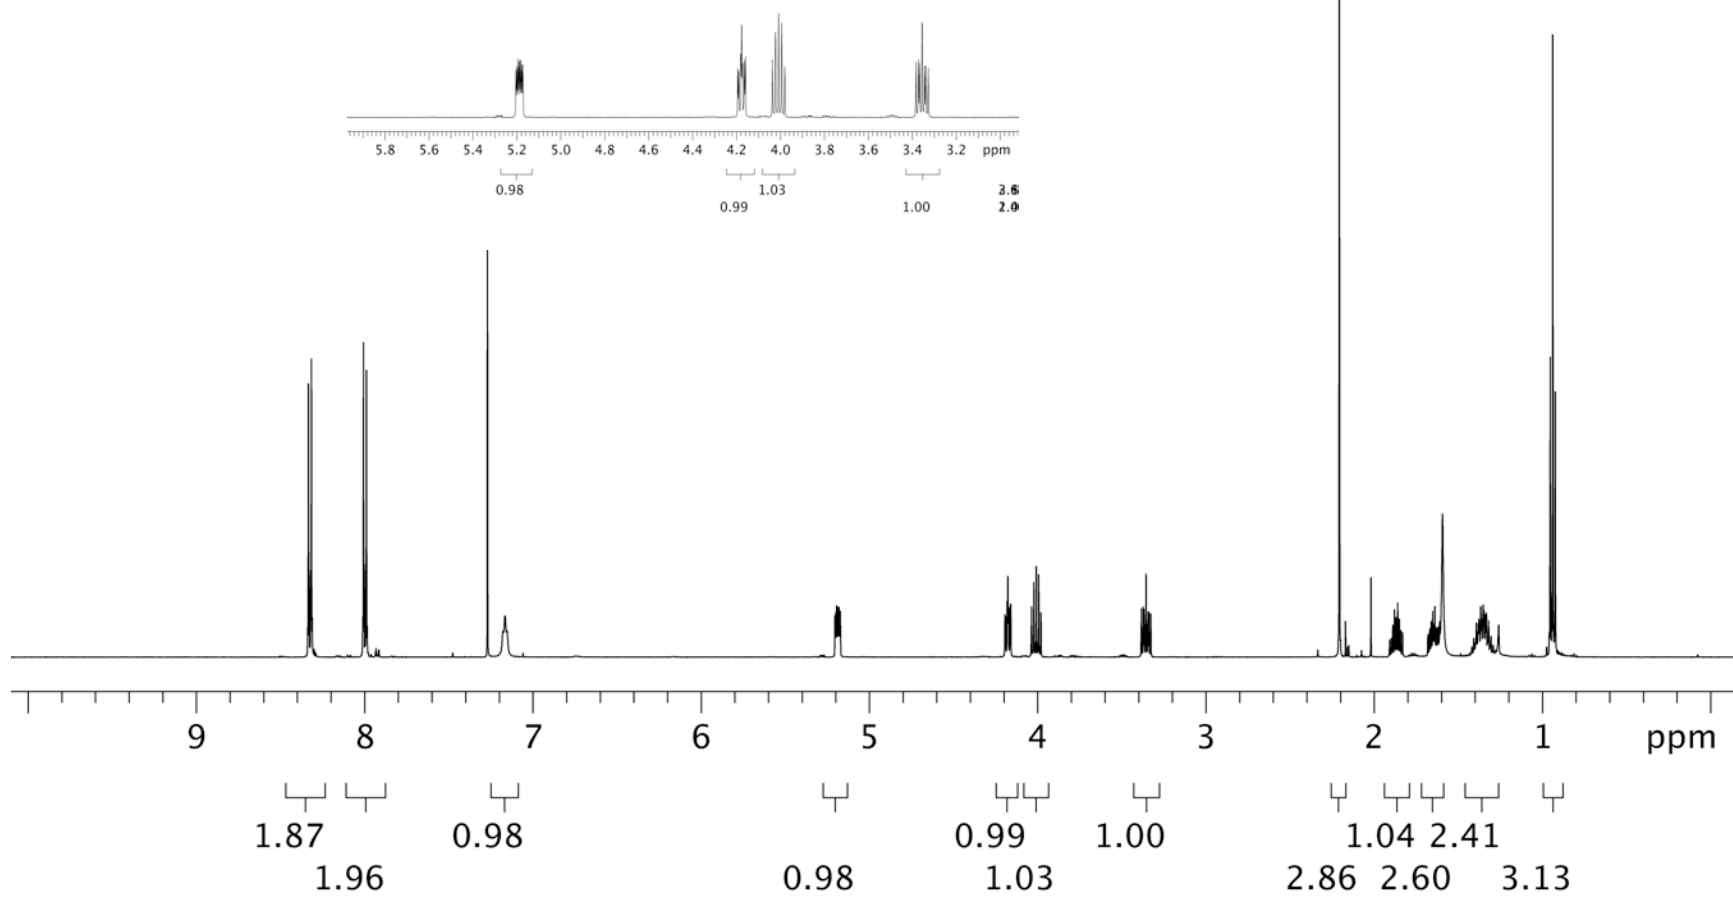

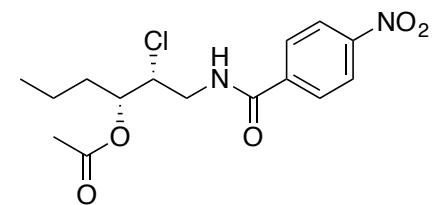

*s*-2c-OAc-NO<sub>2</sub>

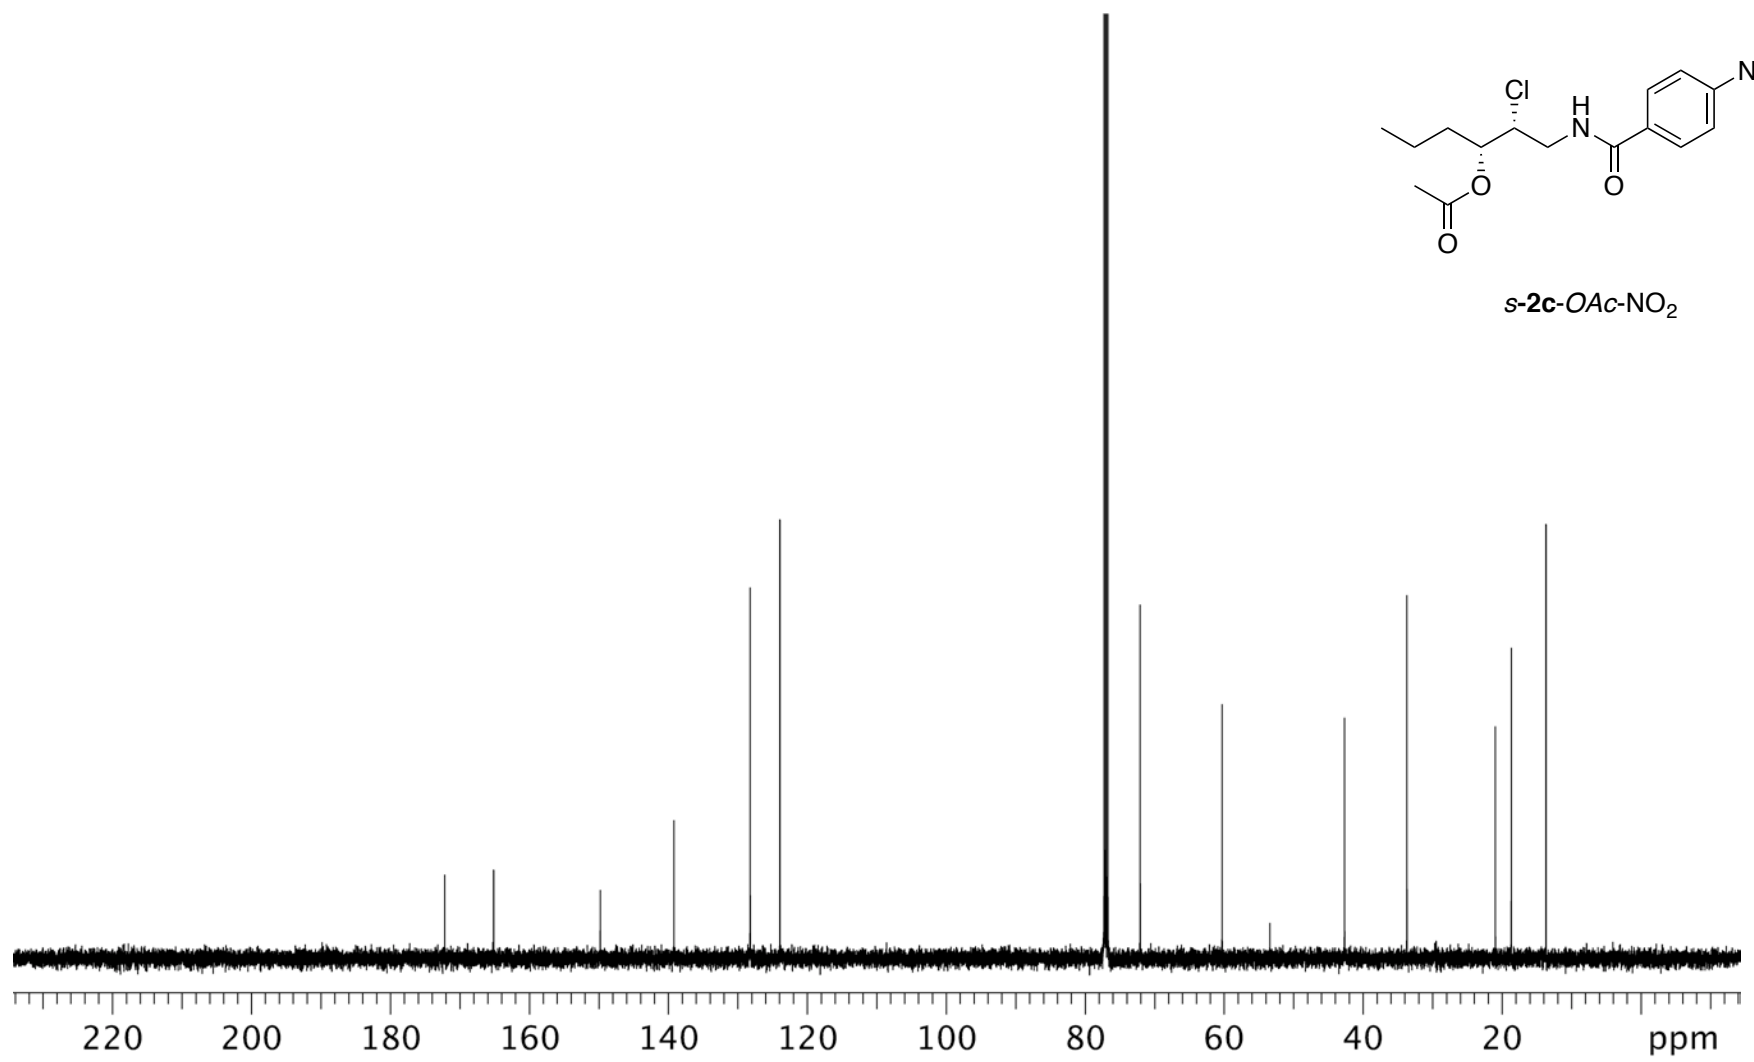

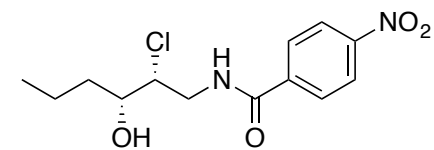

*s*-2c-OH-NO<sub>2</sub>

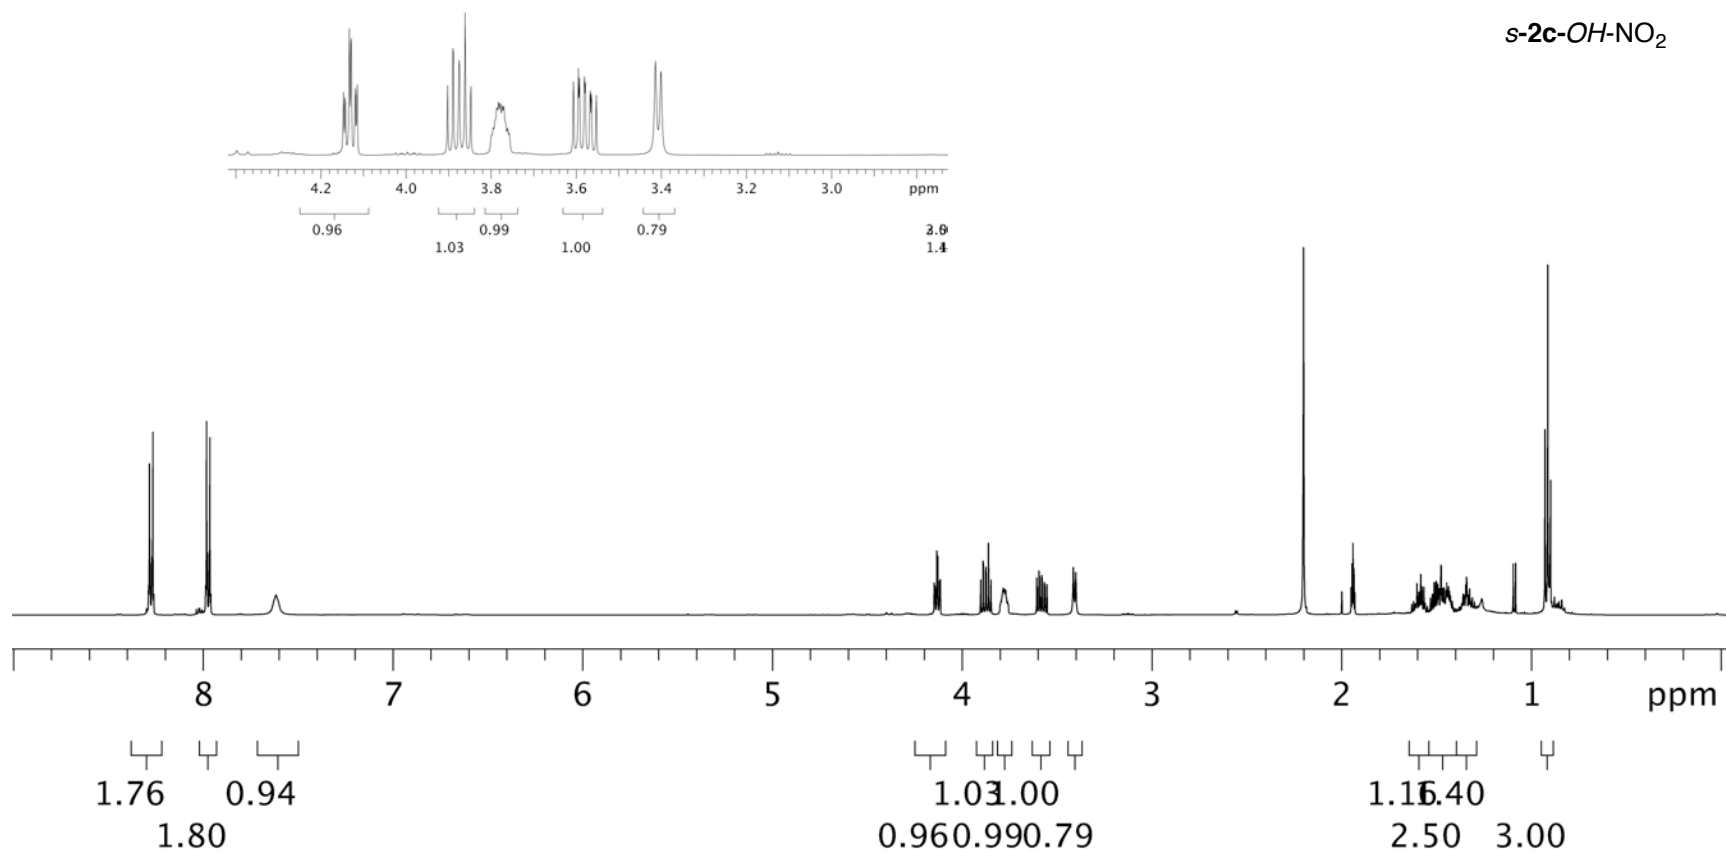

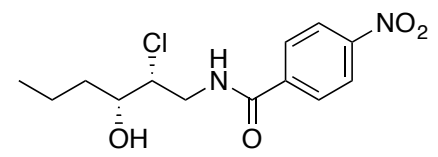

*s*-2c-OH-NO<sub>2</sub>

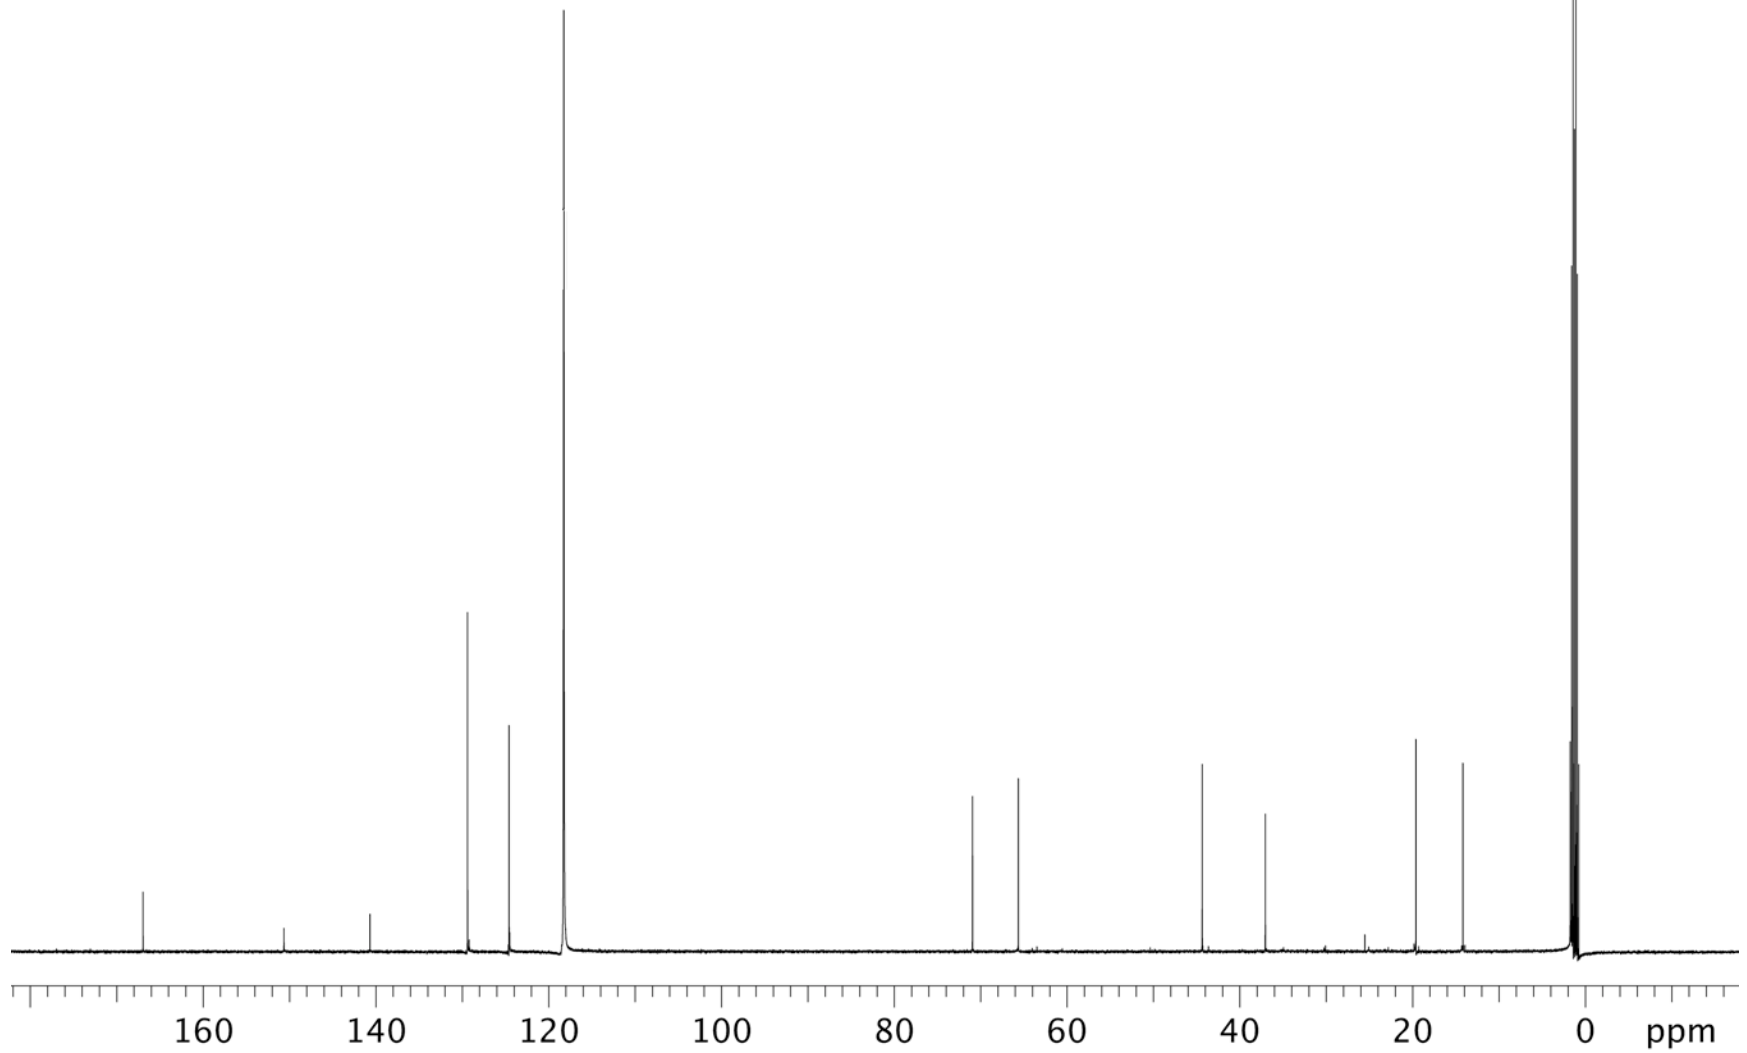

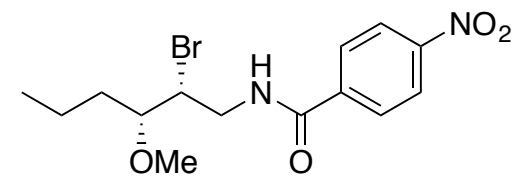

*s*-2c'-OMe-NO<sub>2</sub>

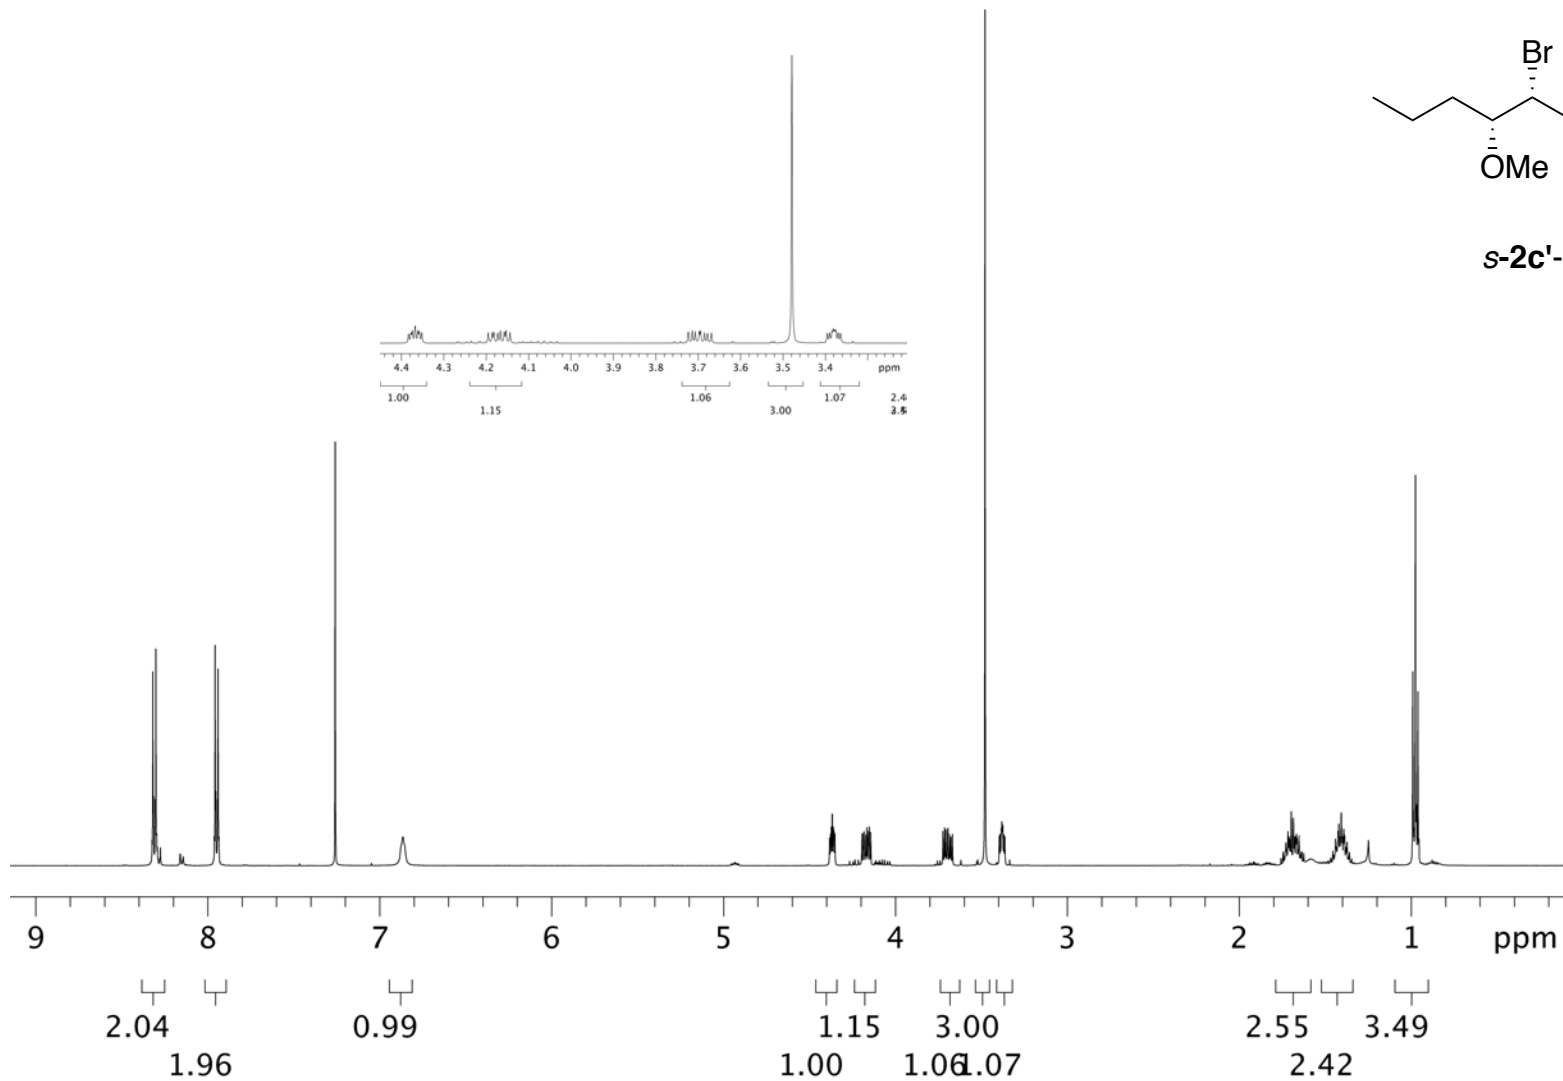

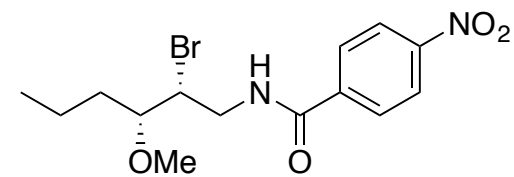

*s*-2c'-OMe-NO<sub>2</sub>

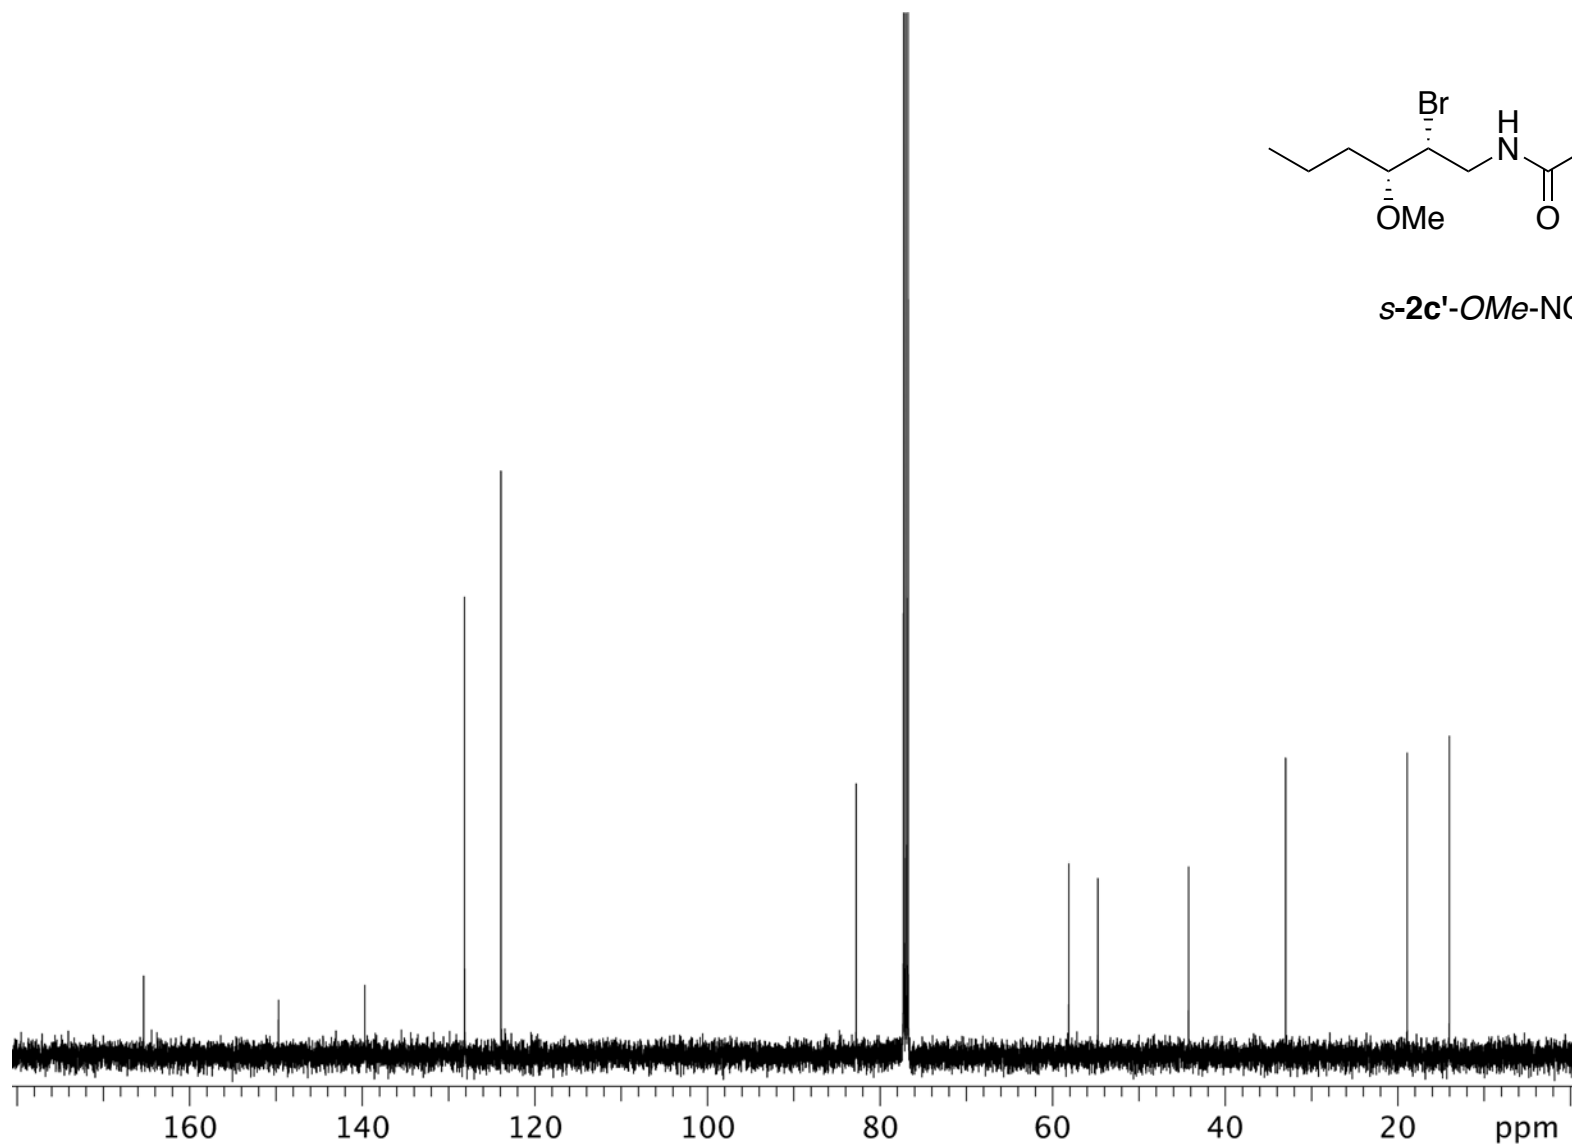

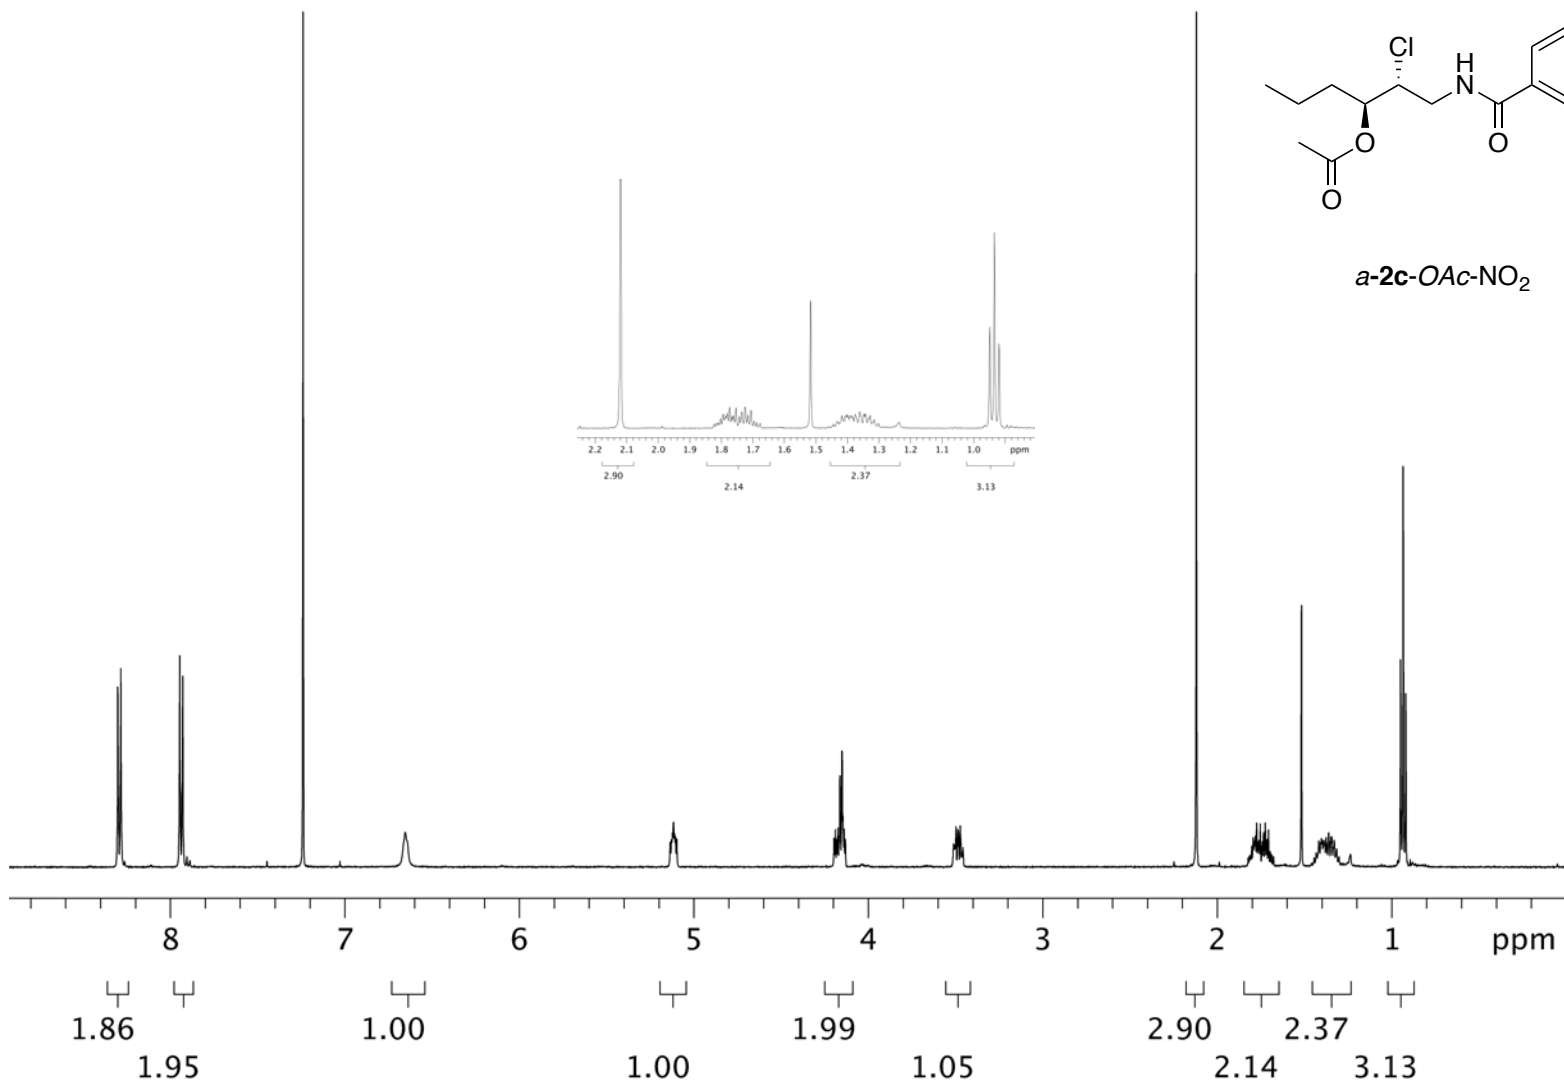



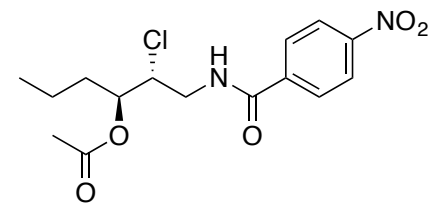

*a*-2c-OAc-NO<sub>2</sub>

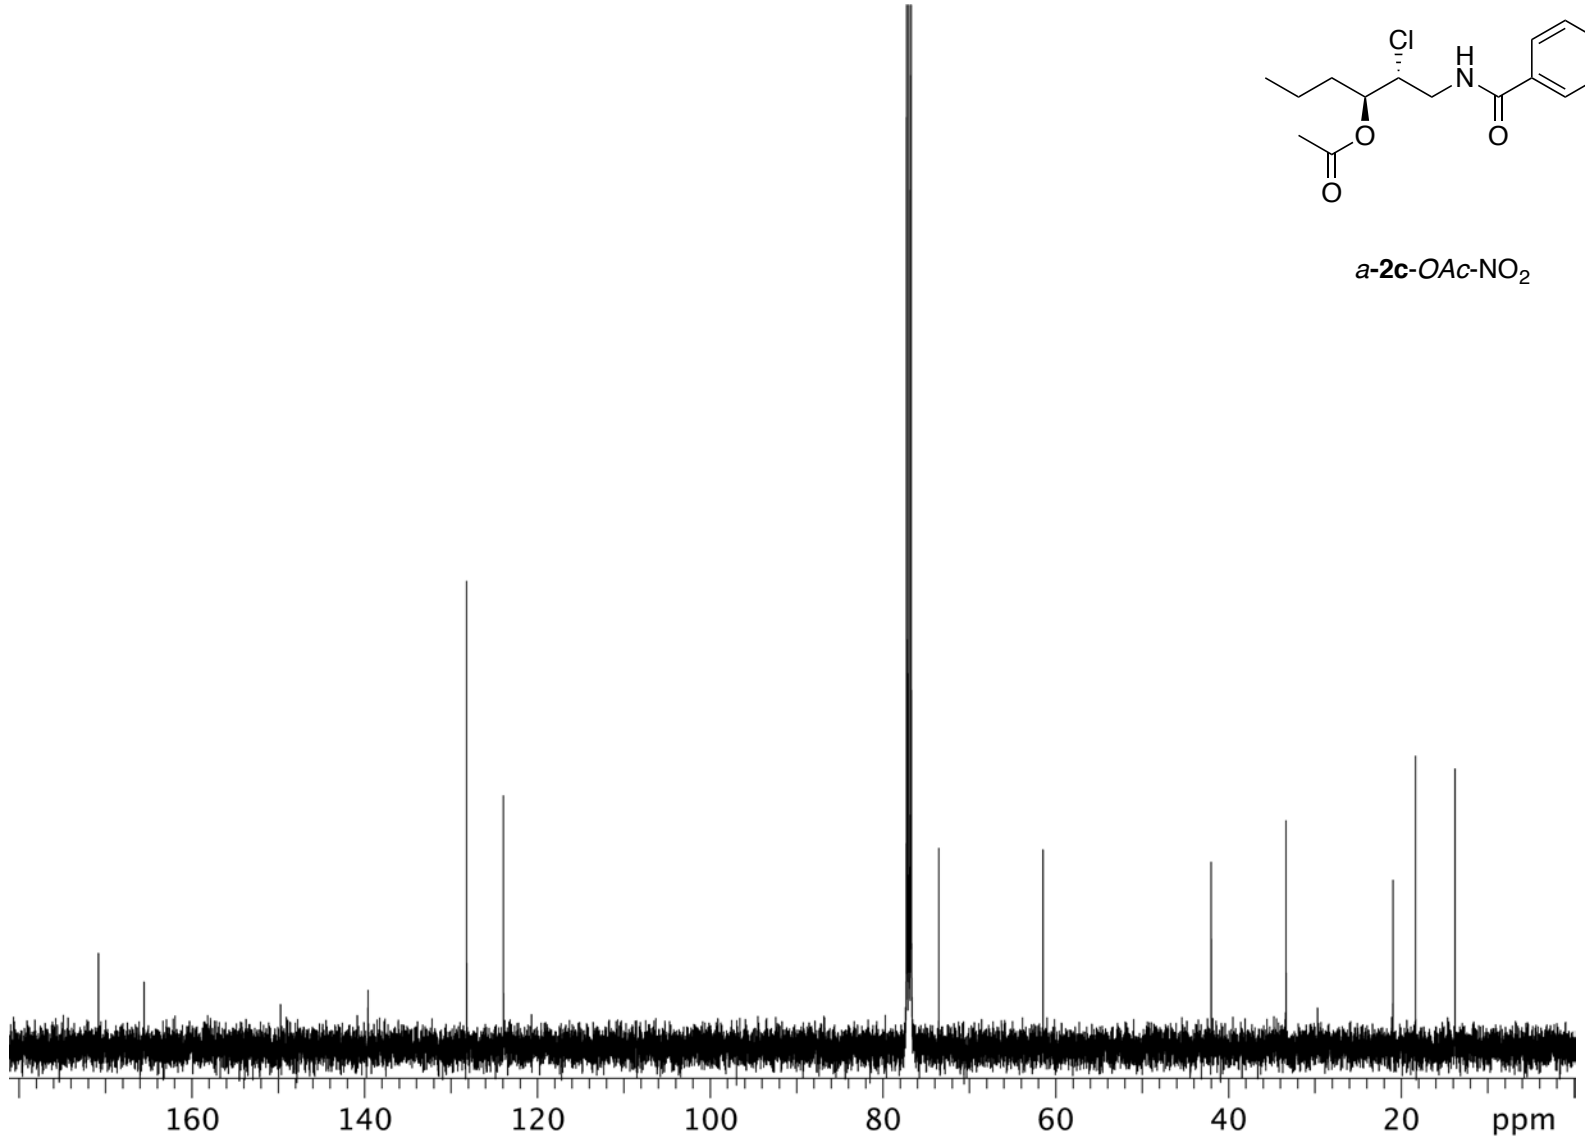

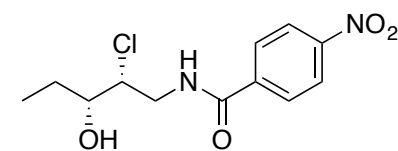

*s*-2h-OH-NO<sub>2</sub>

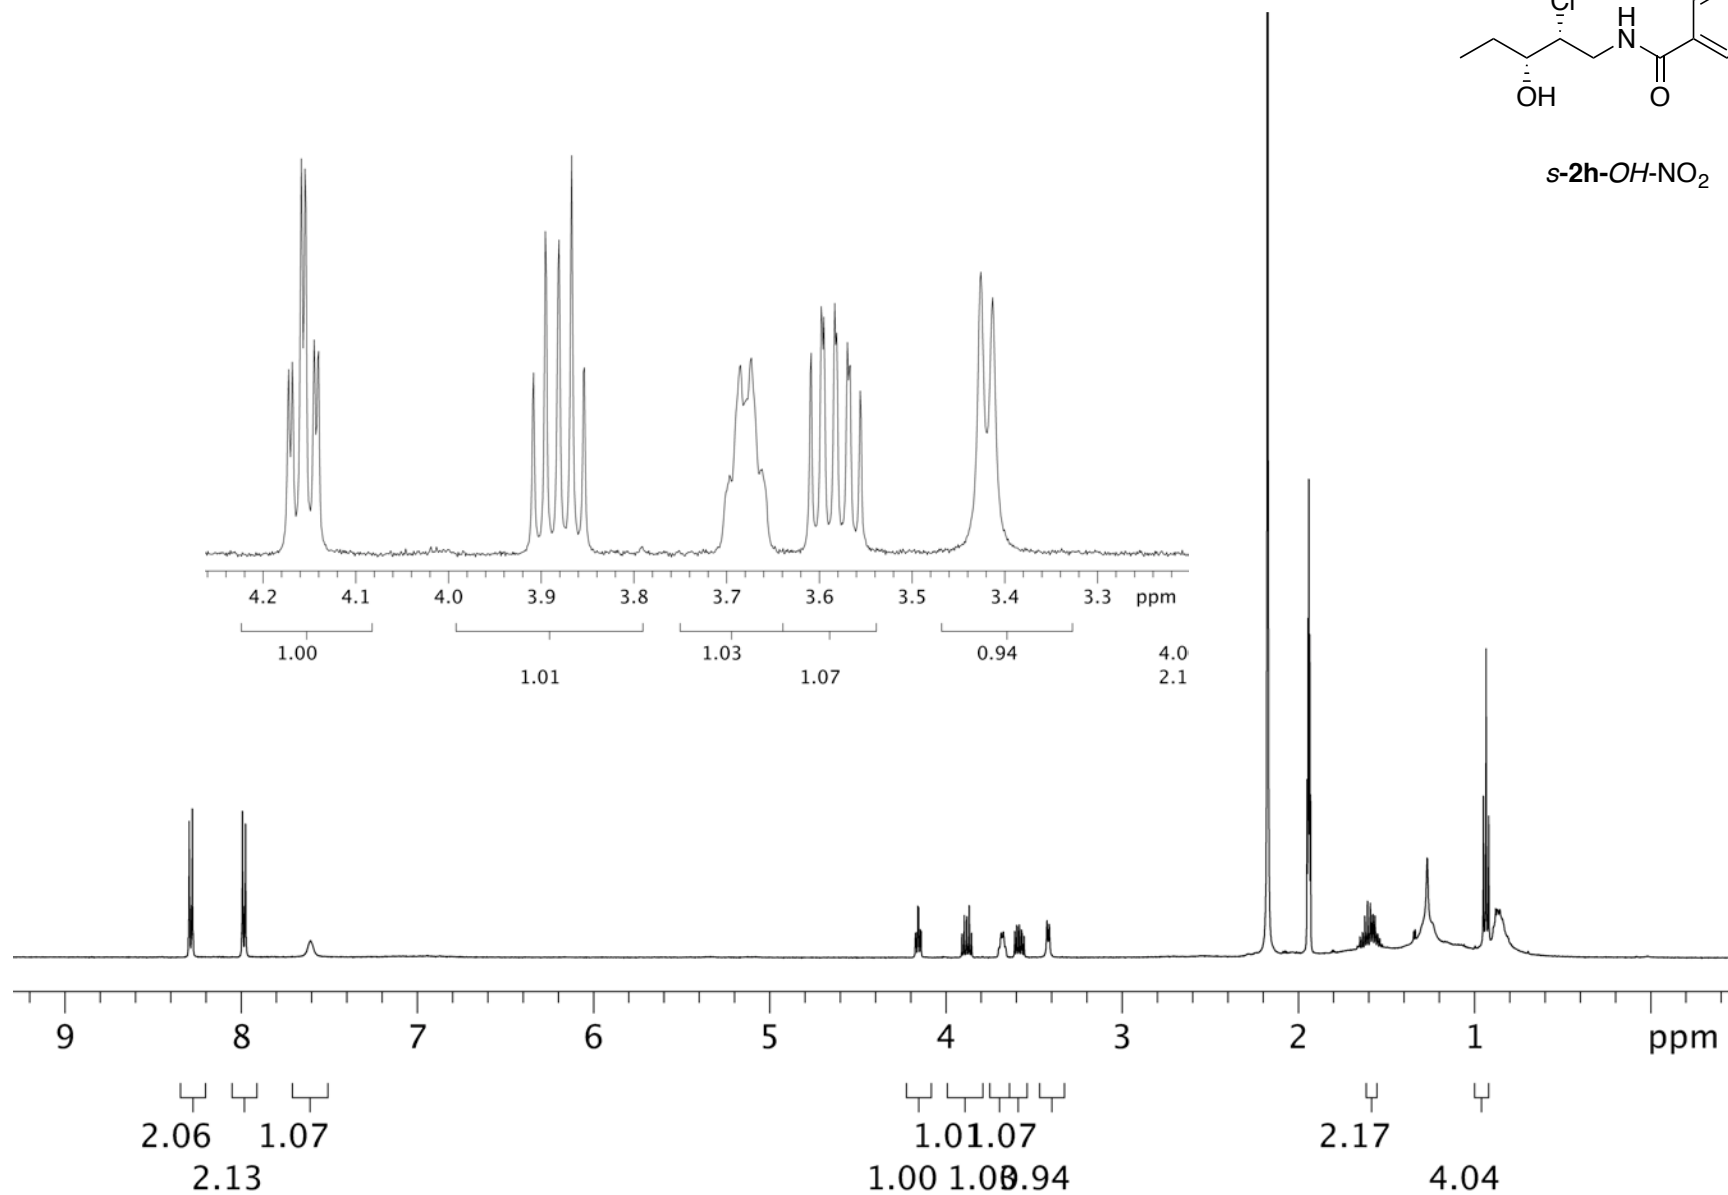

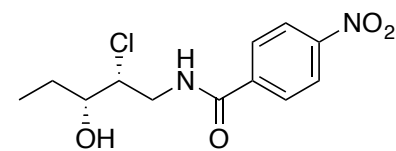

*s*-2*h*-OH-NO<sub>2</sub>

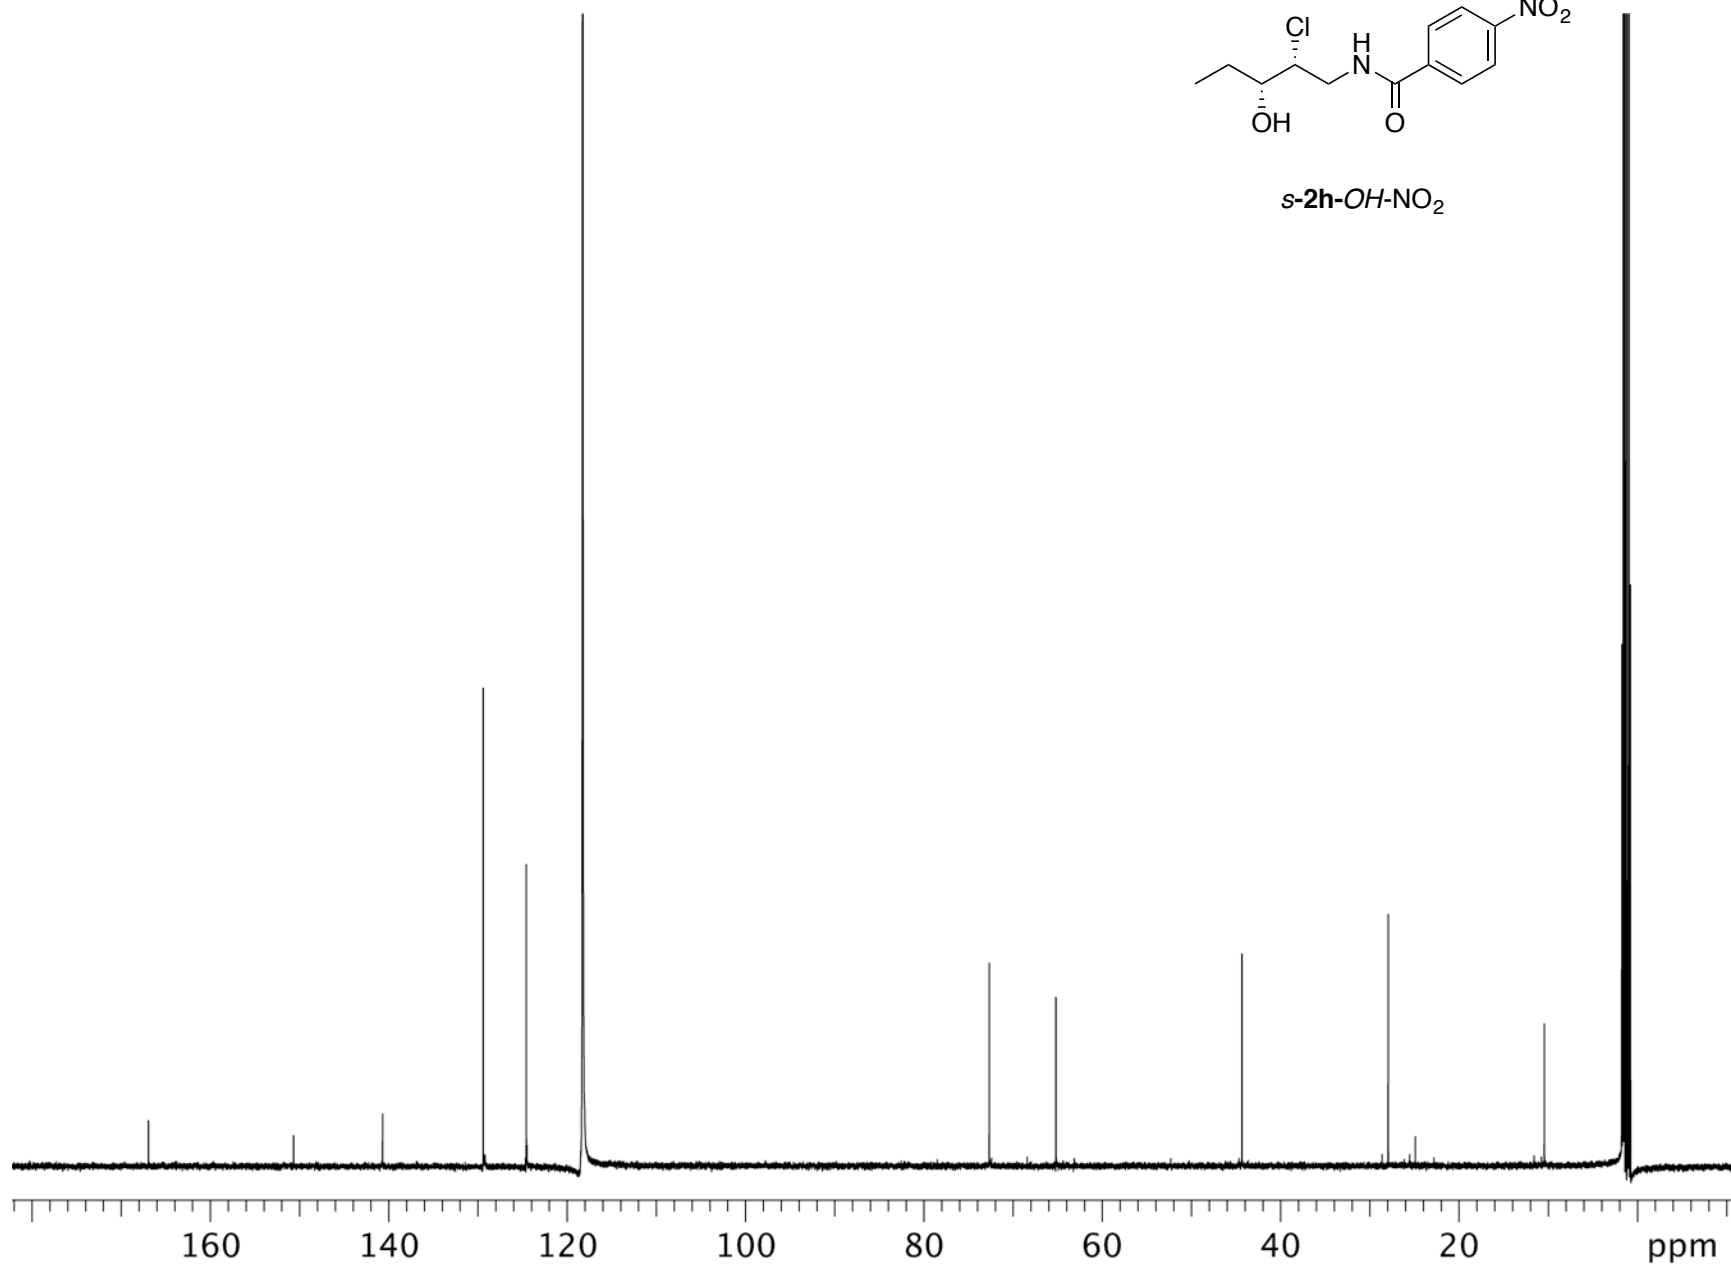

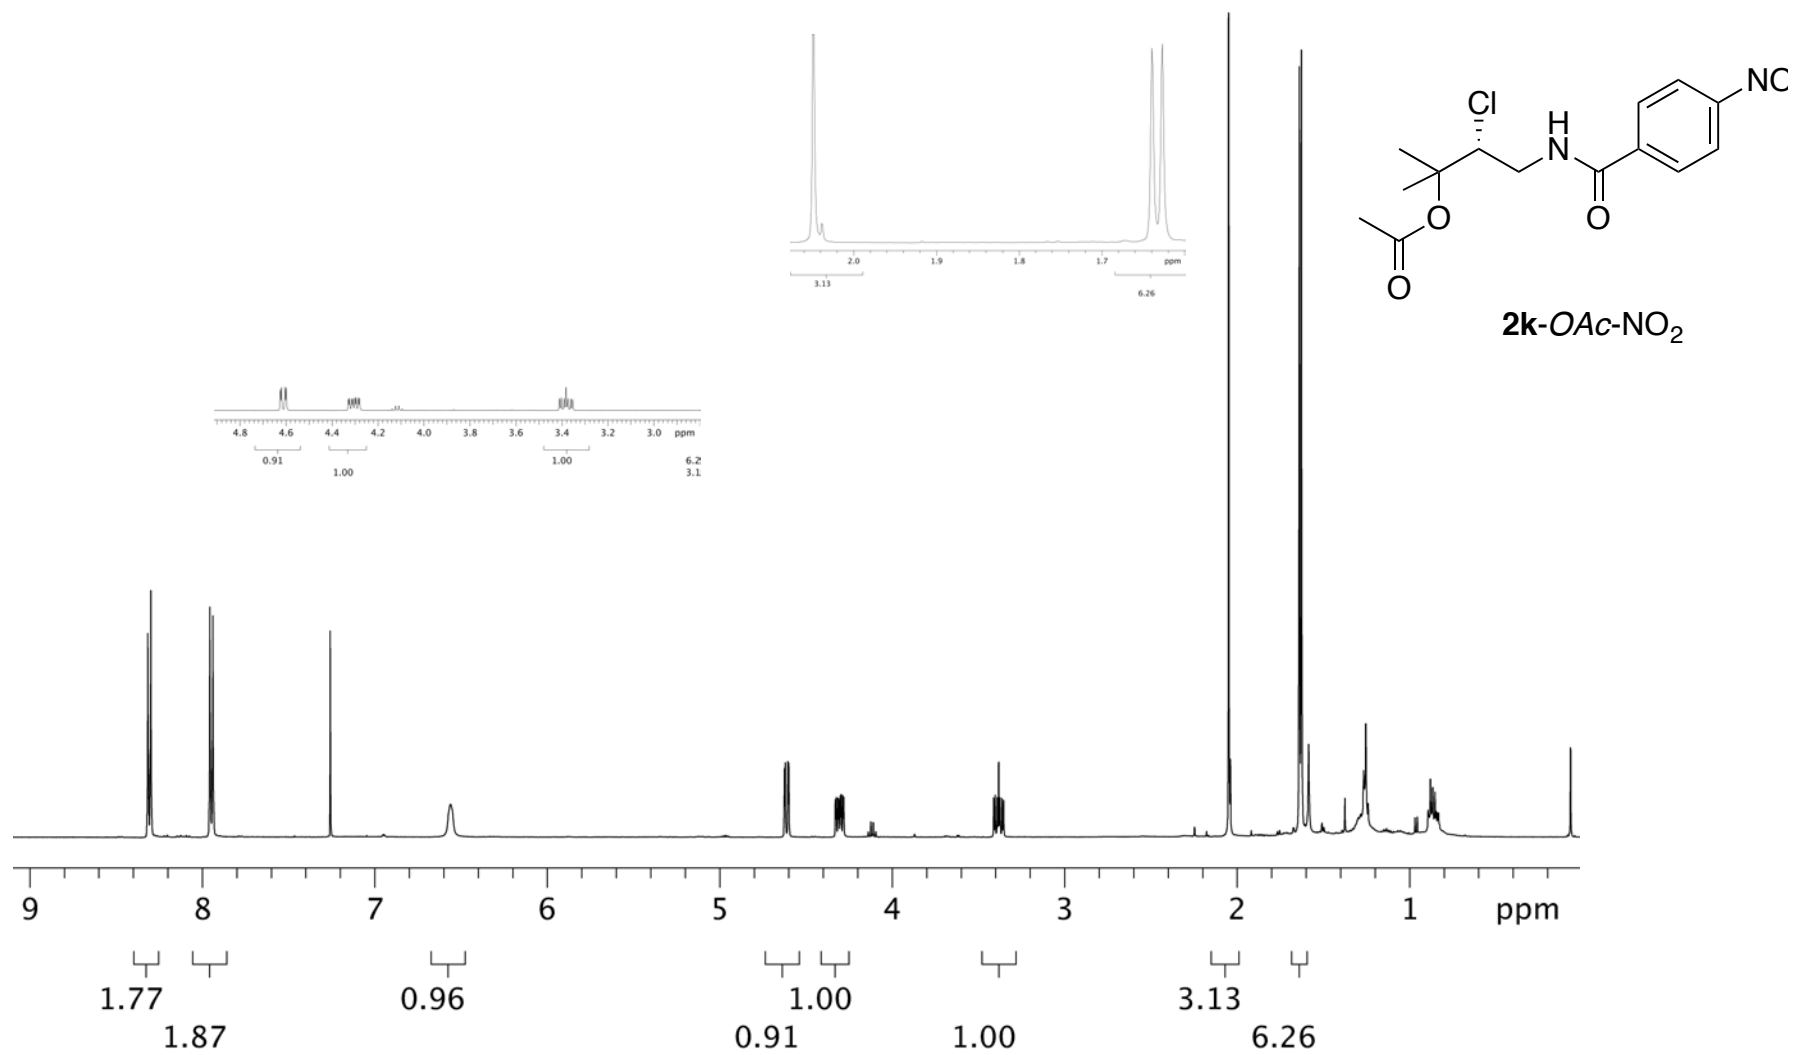

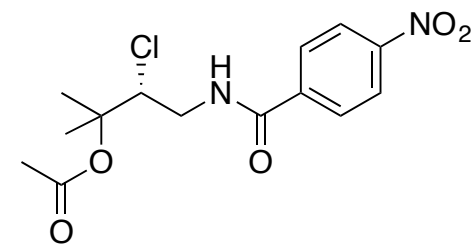

**2k-OAc-NO<sub>2</sub>**

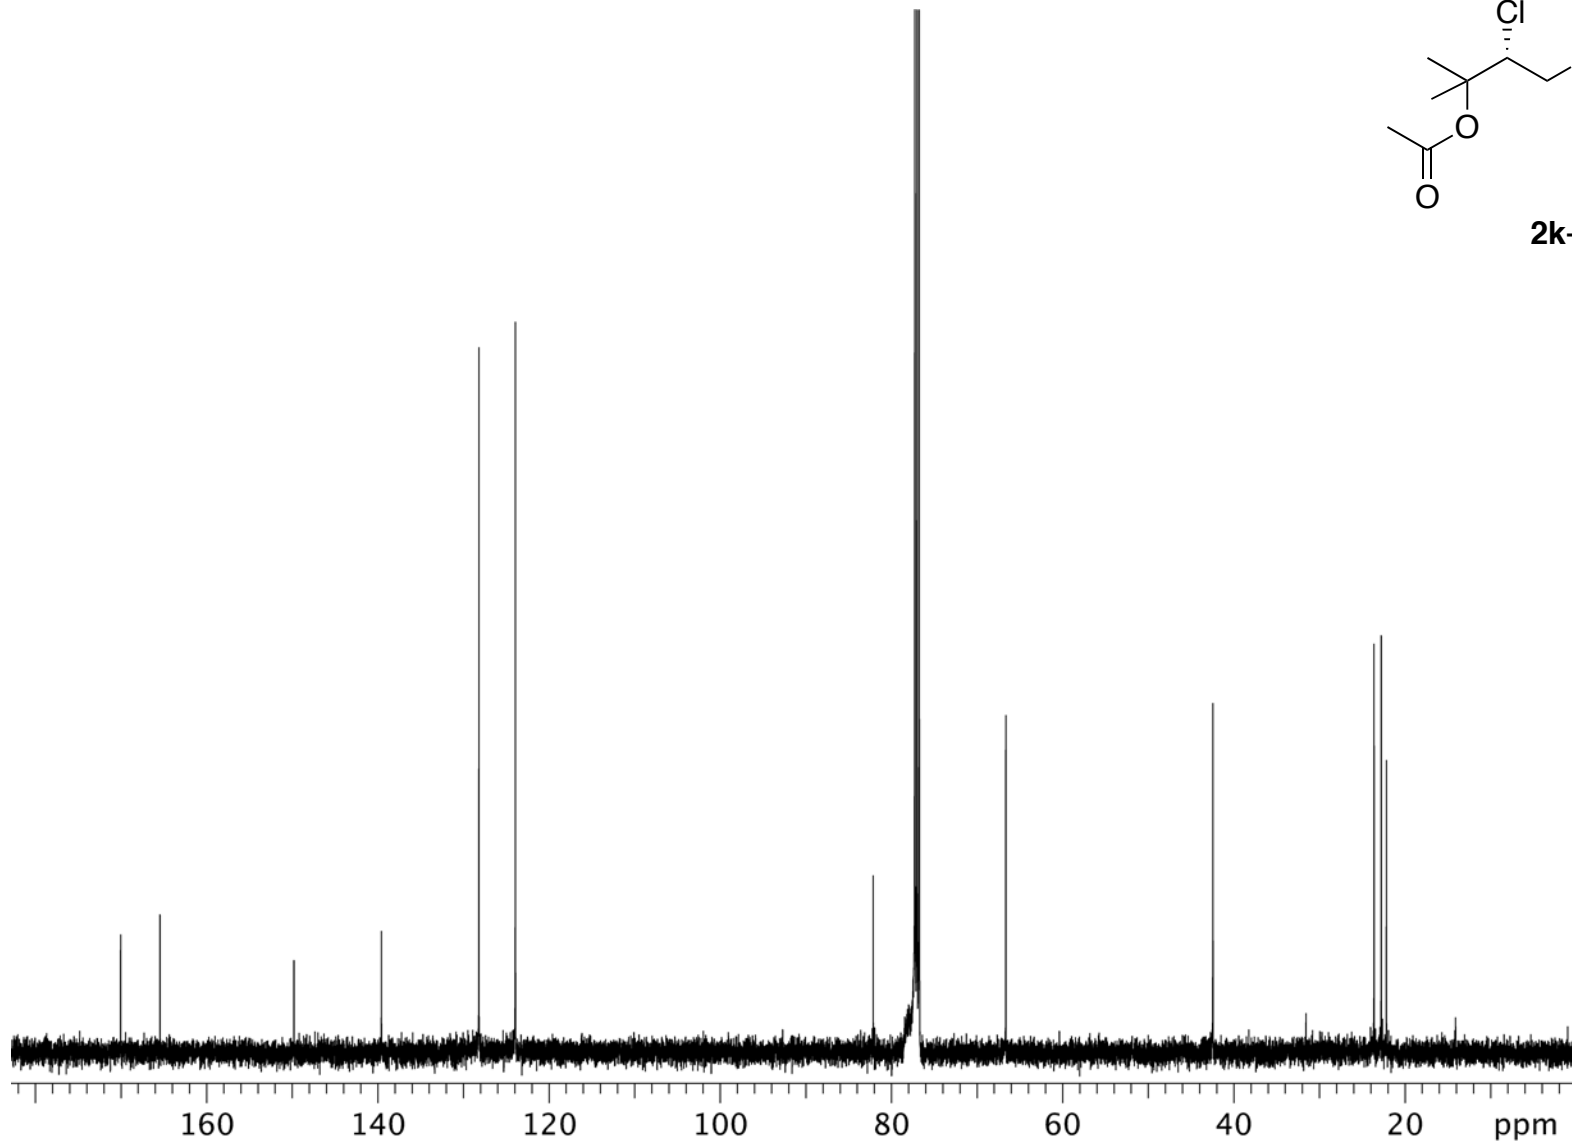

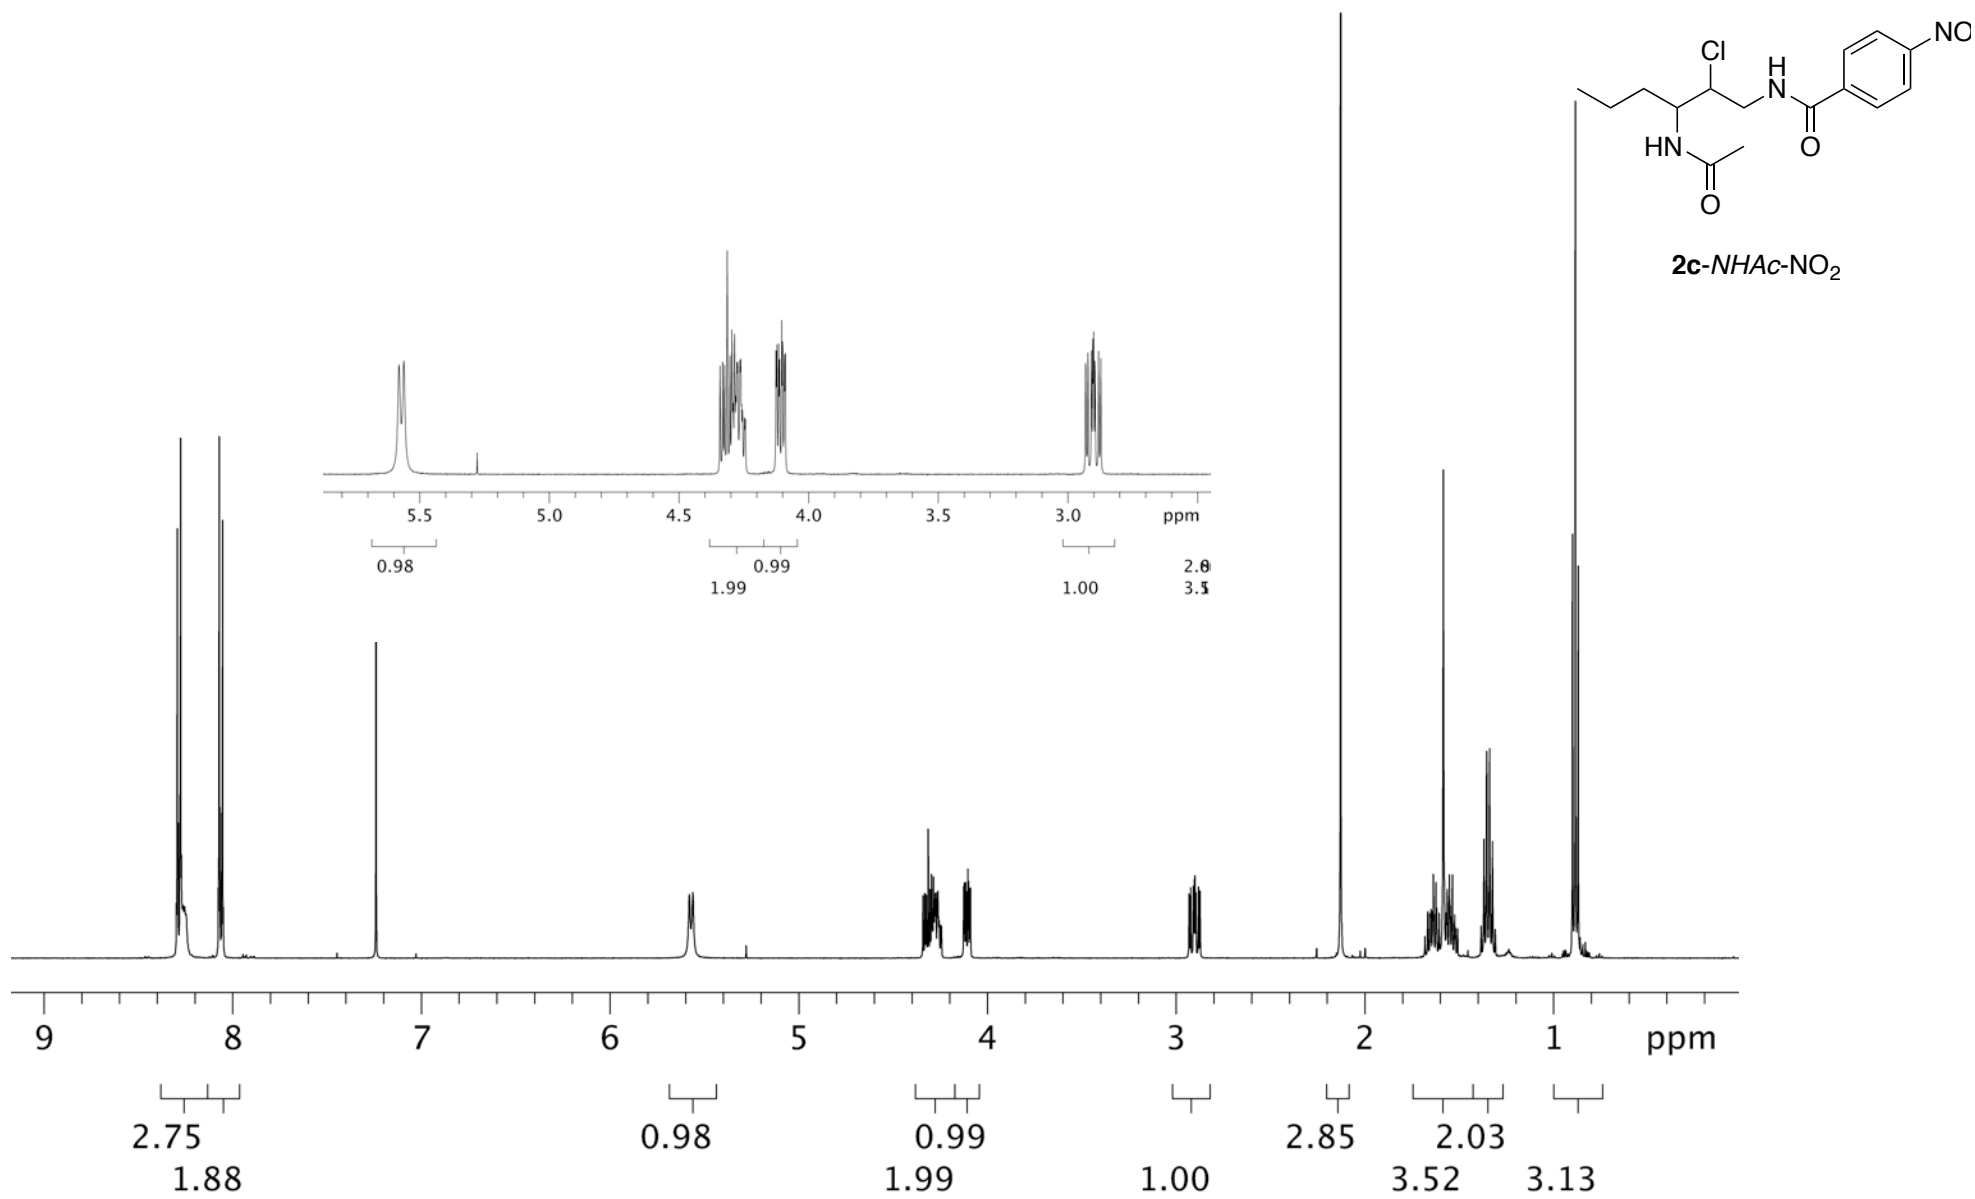

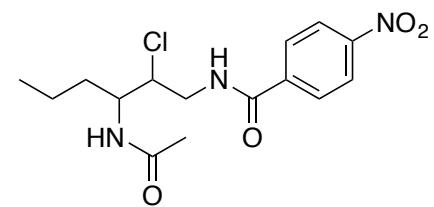

2c-NHAc-NO<sub>2</sub>

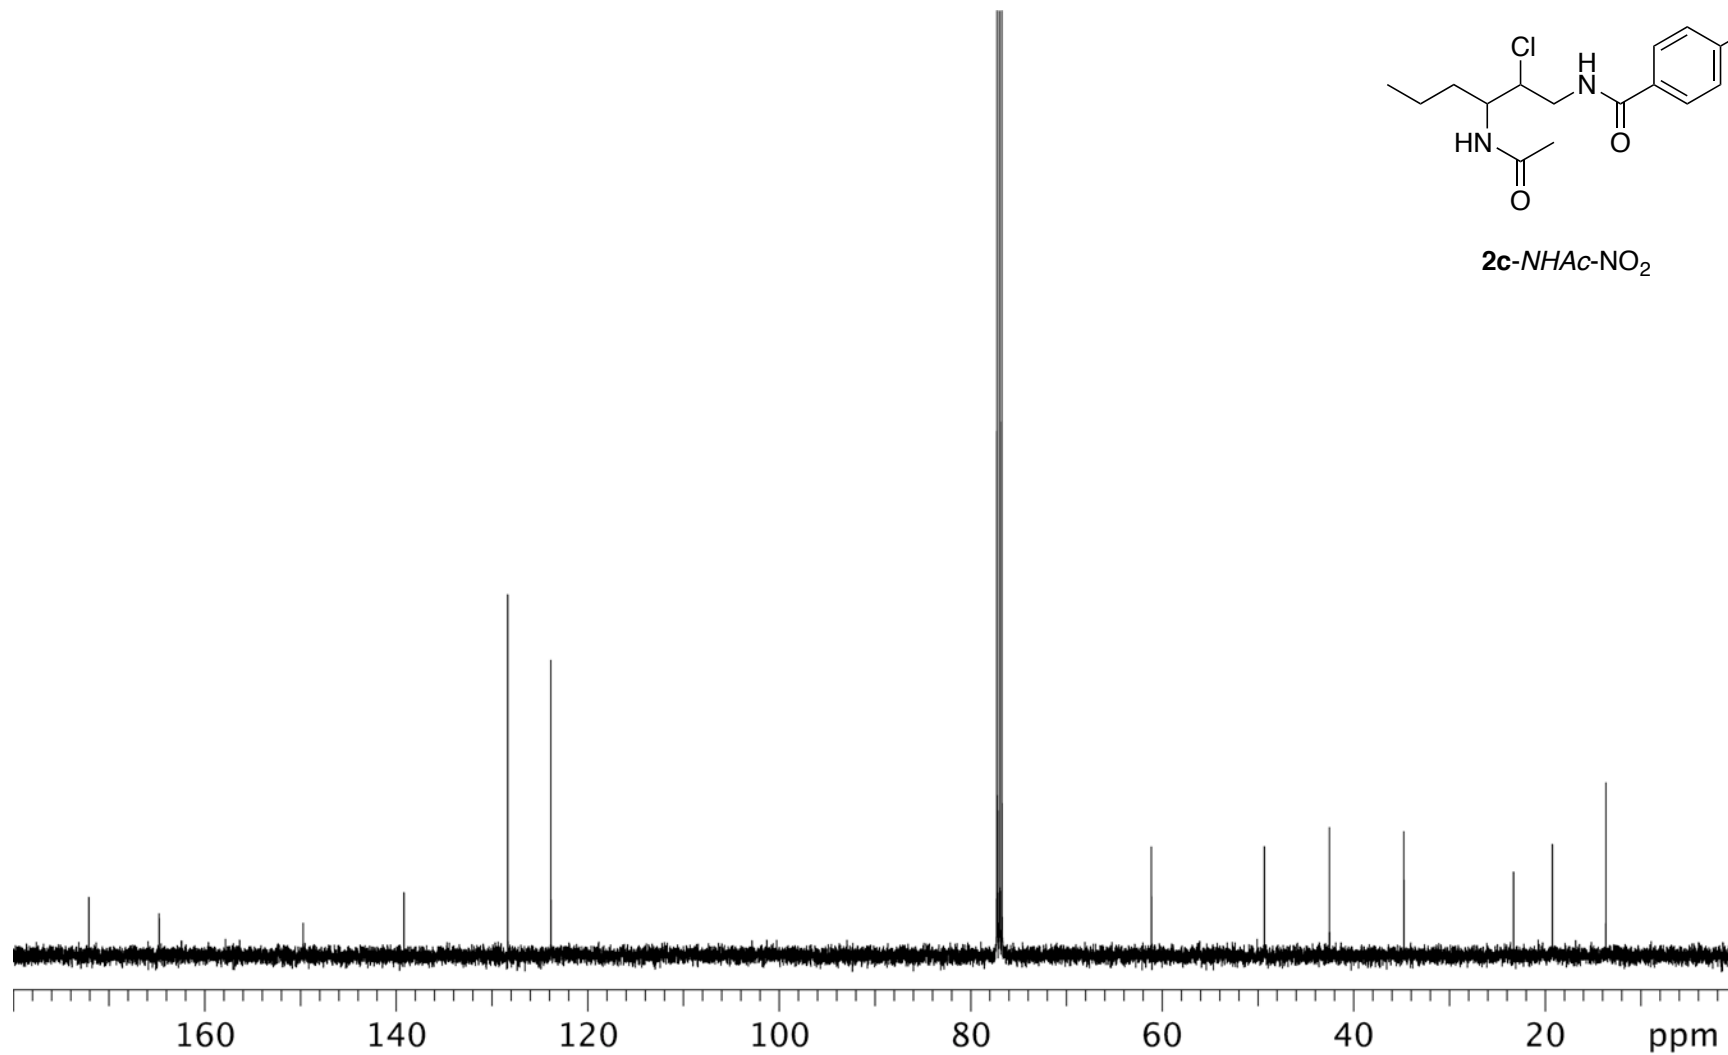

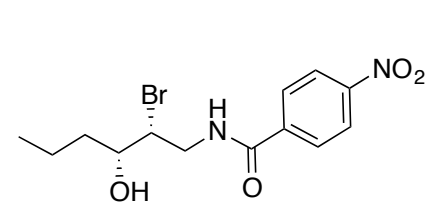

*s*-2C'-OH-NO<sub>2</sub>

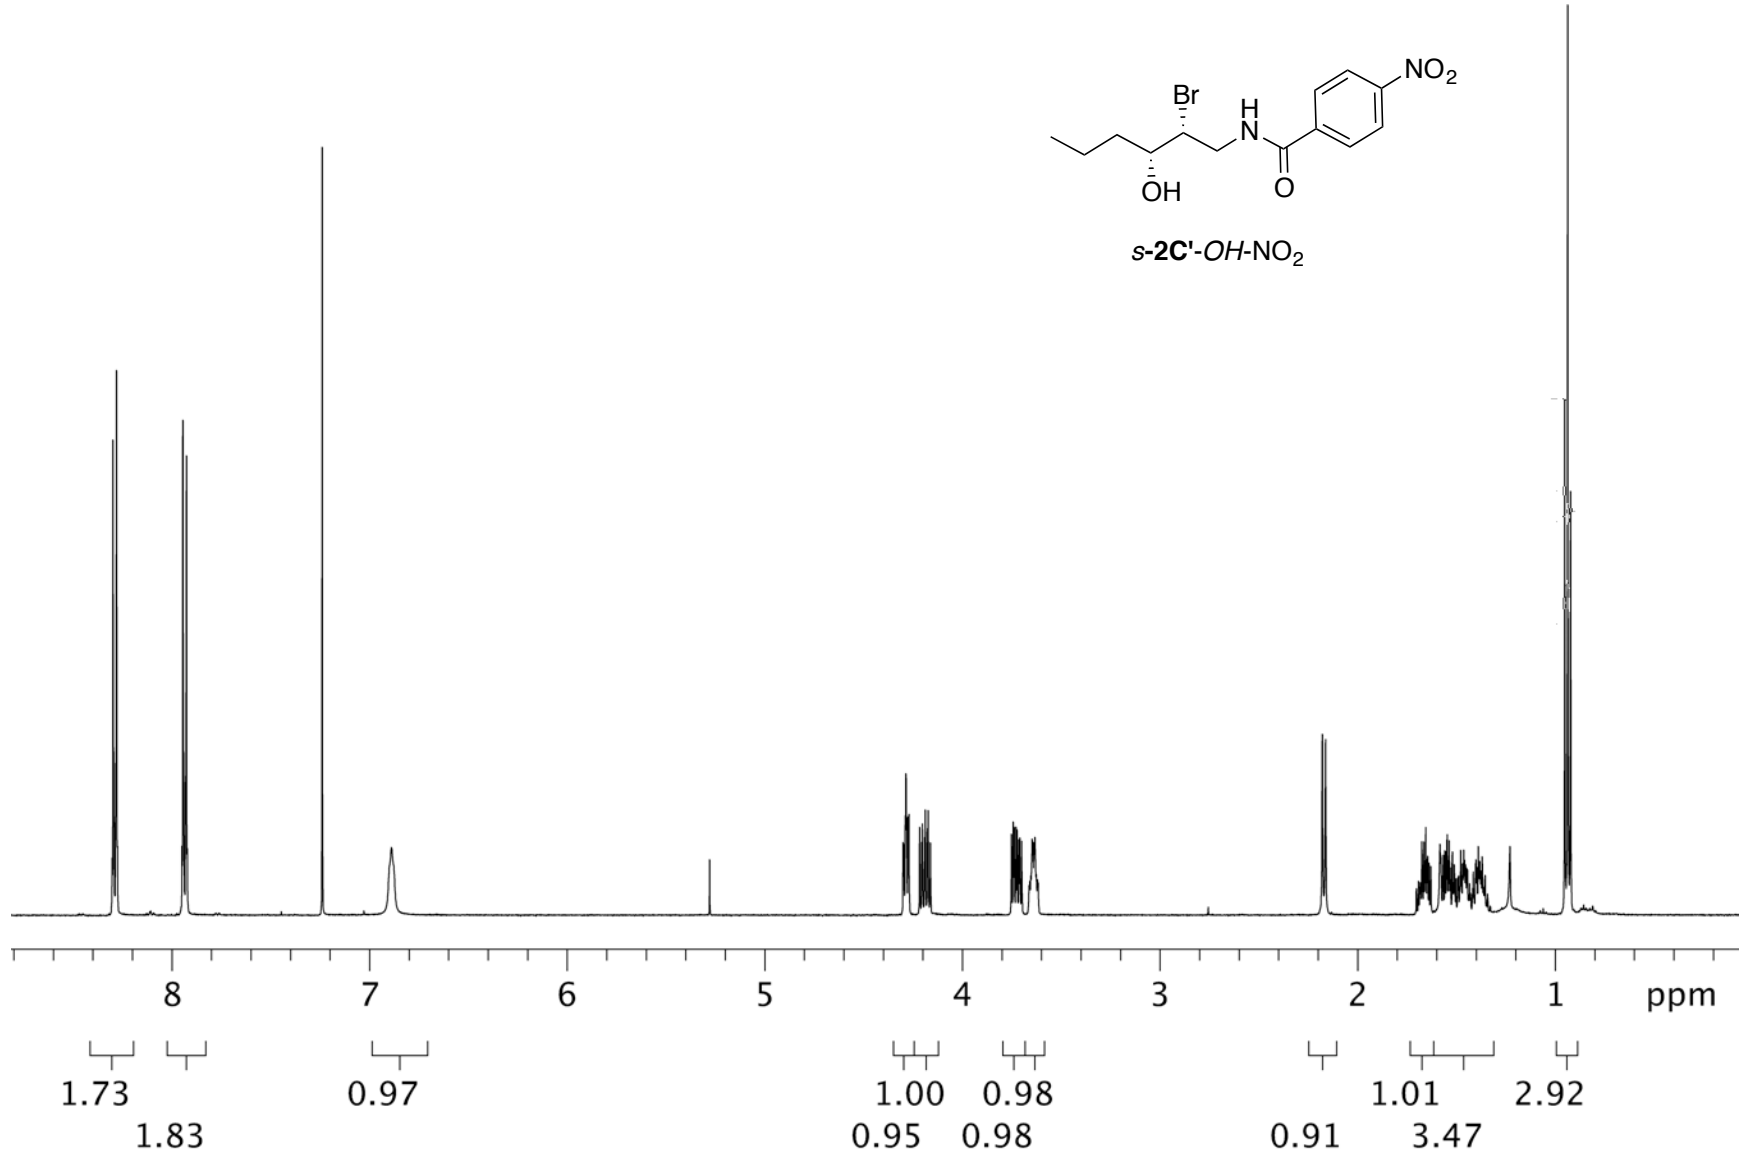



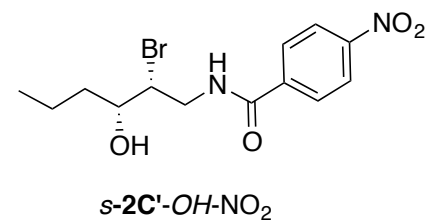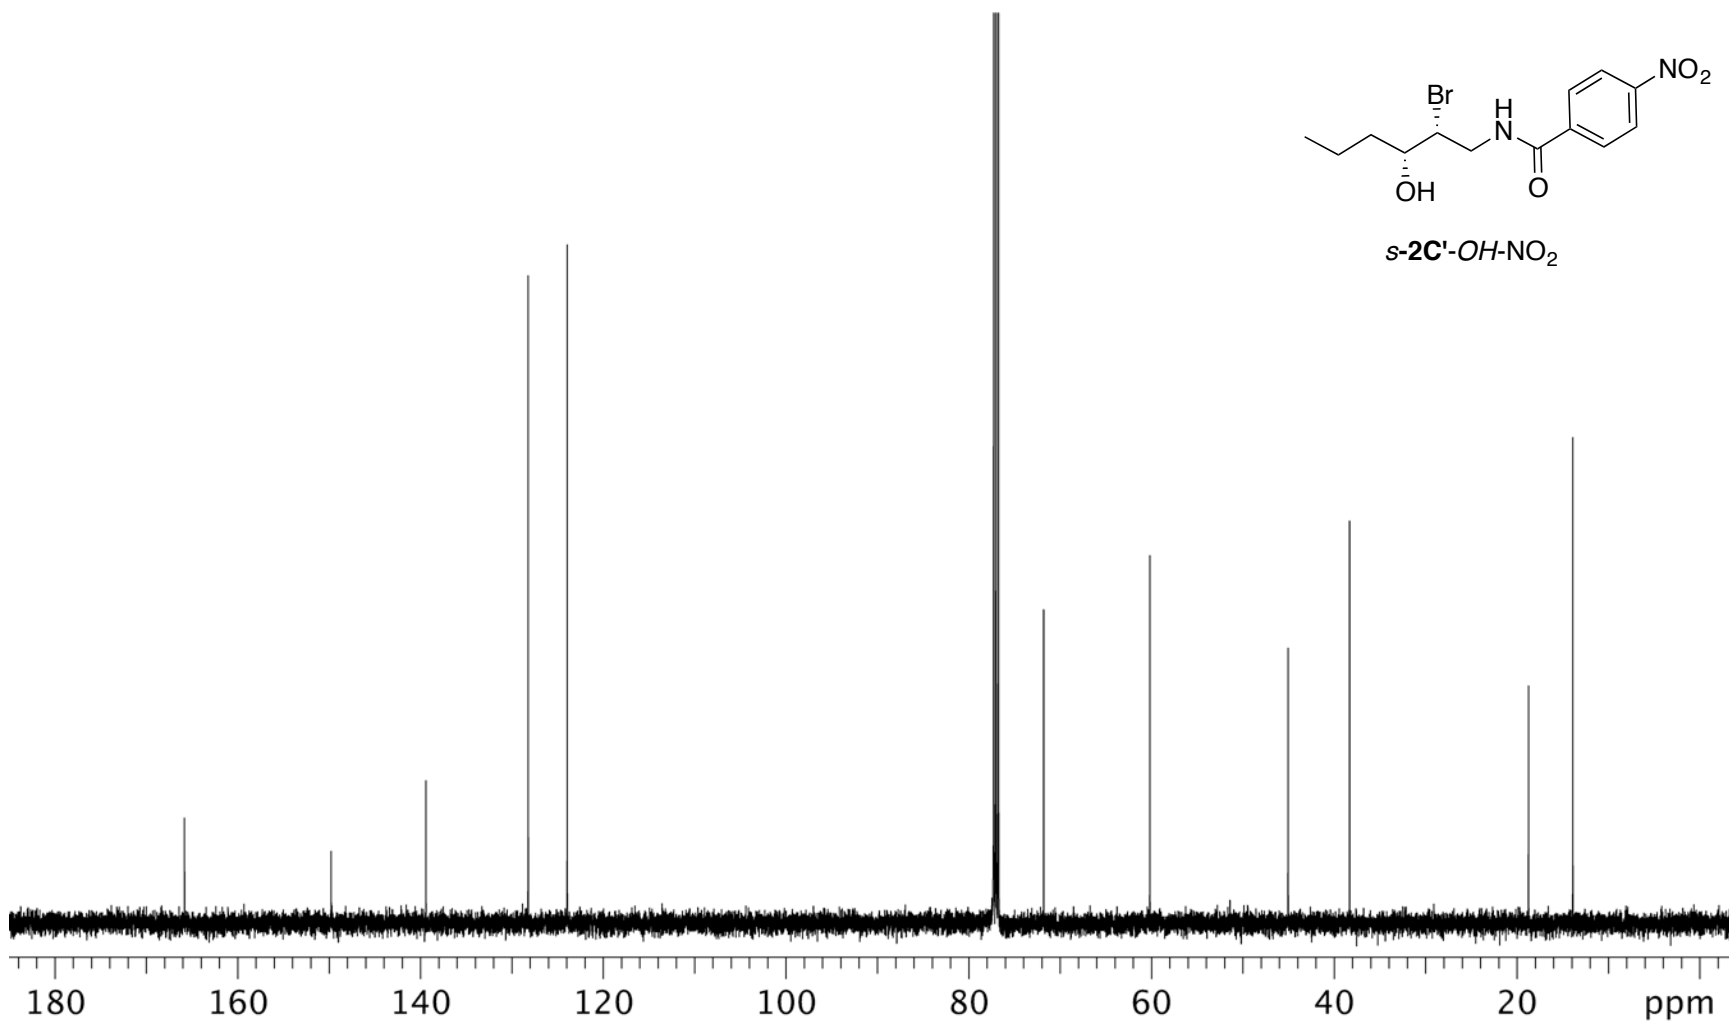

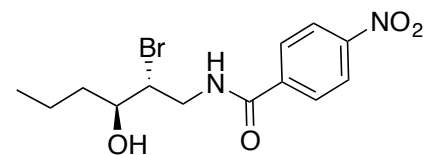

*a-2C'-OH-NO<sub>2</sub>*

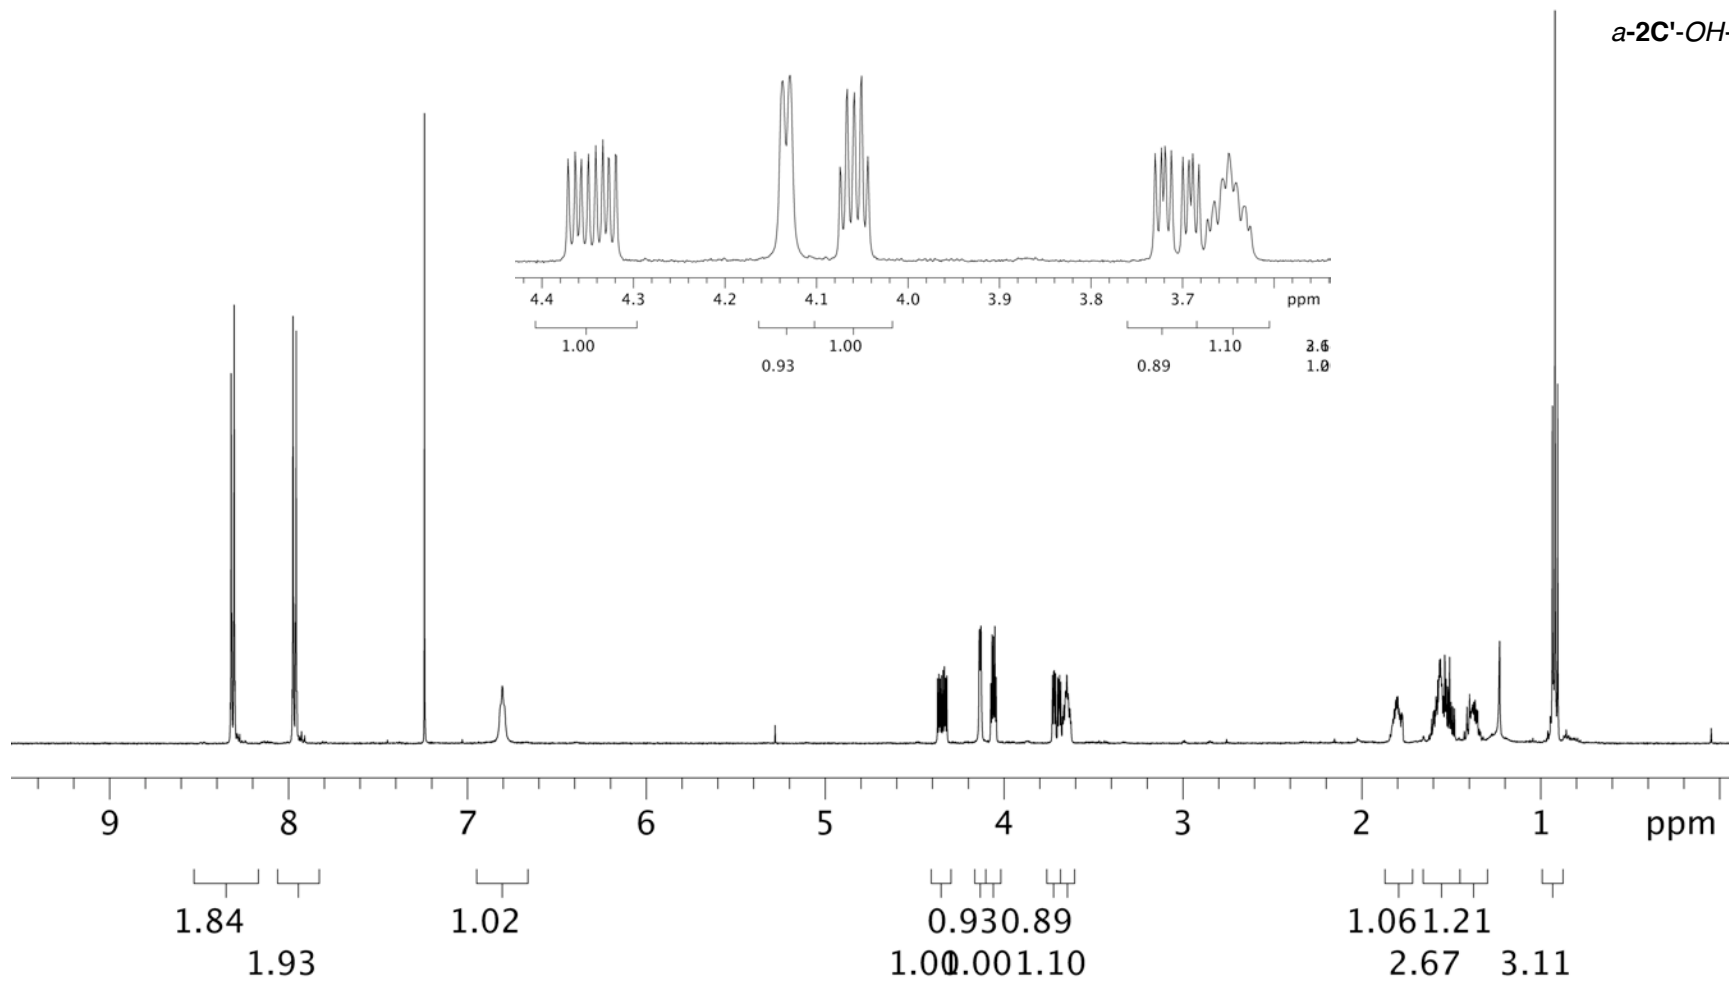

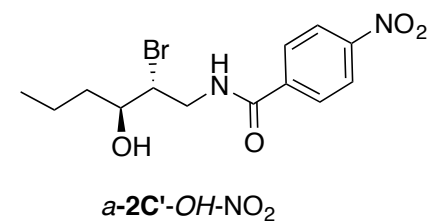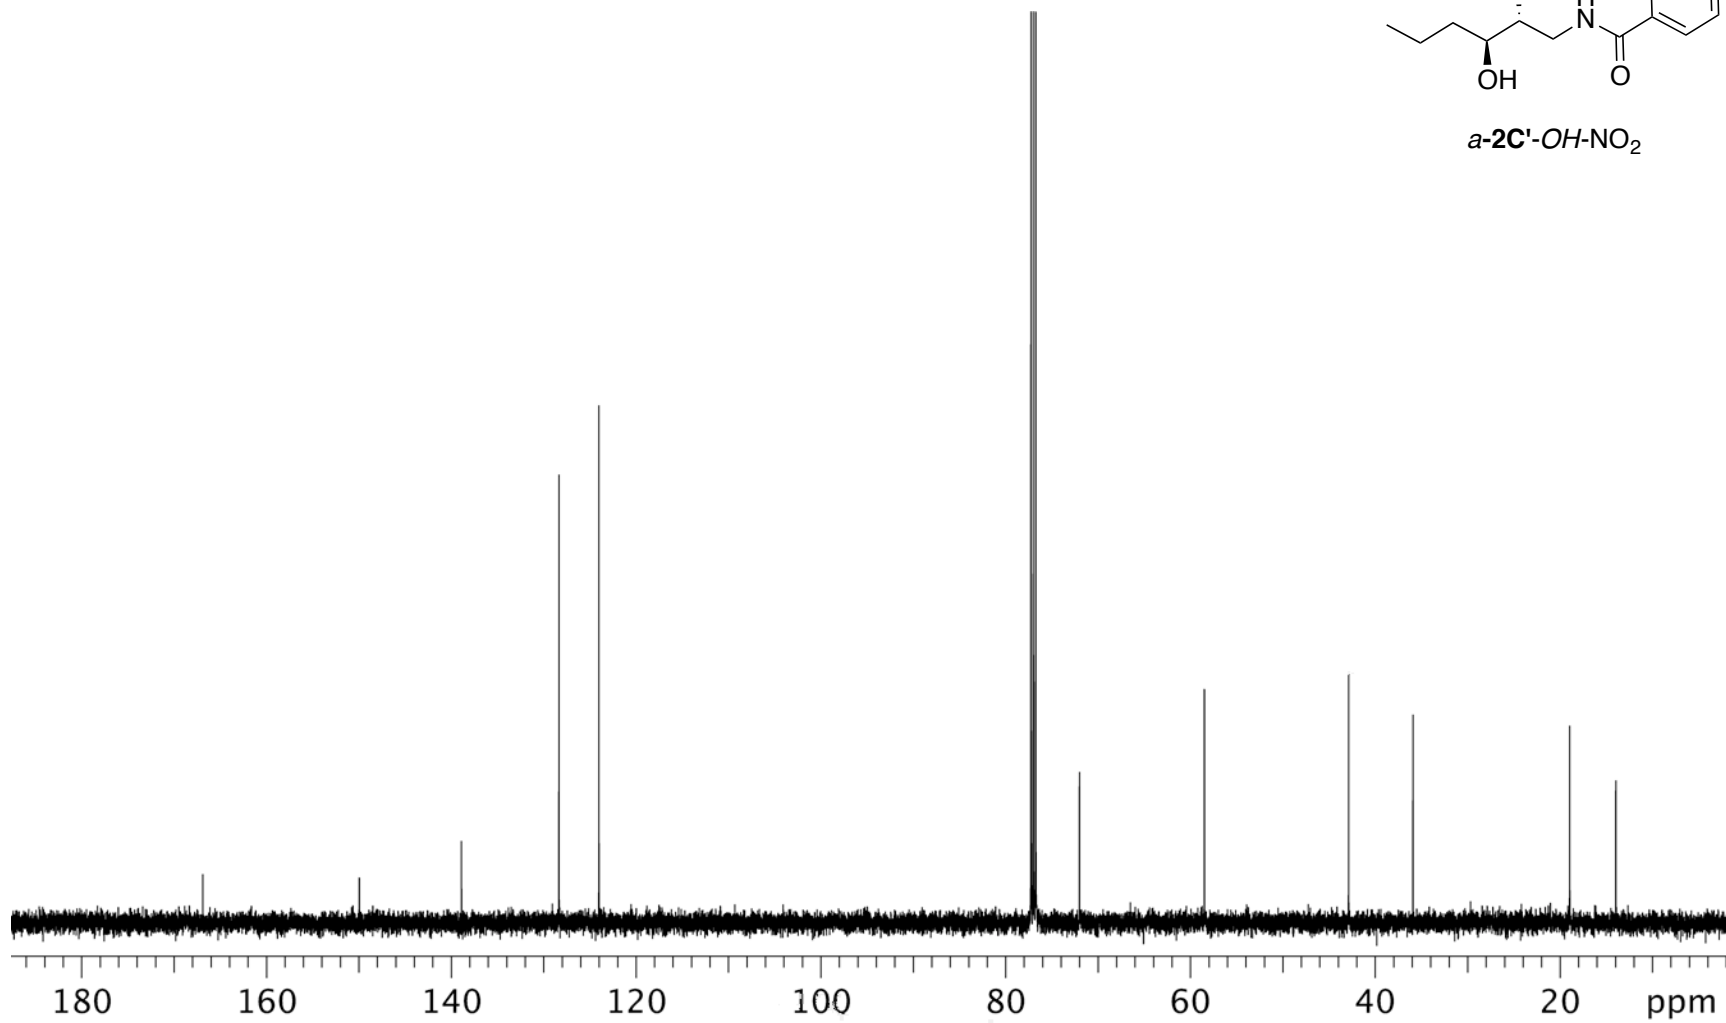

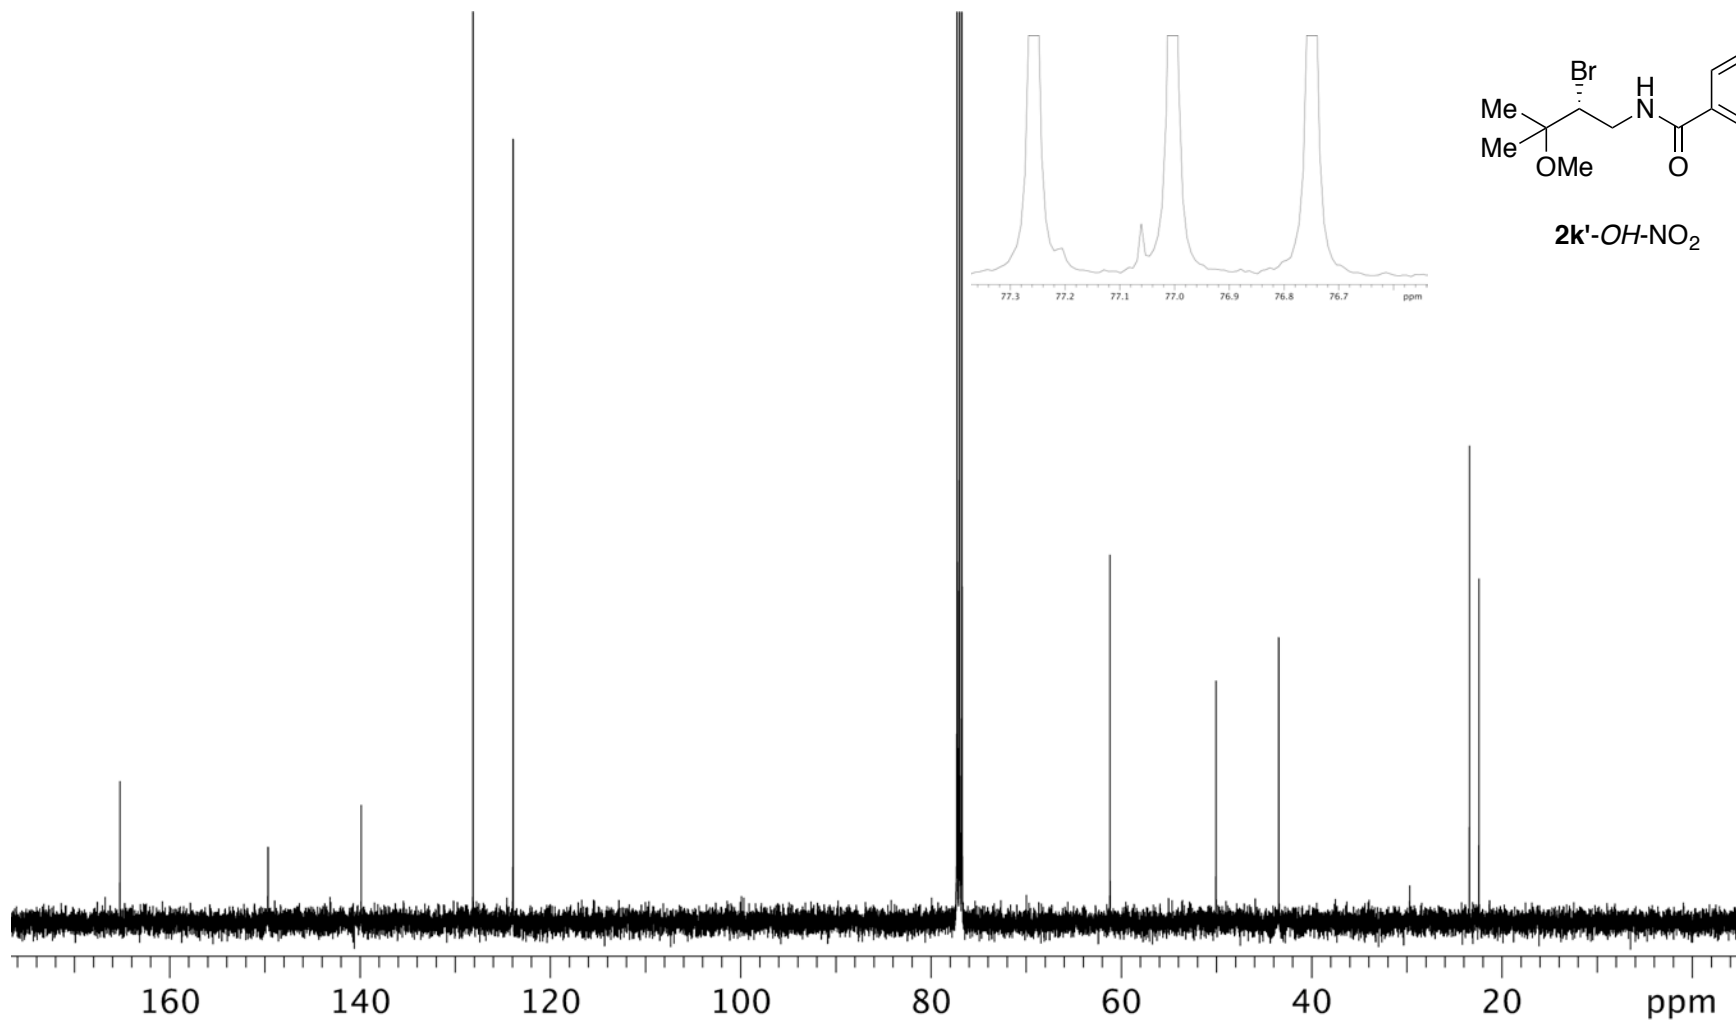

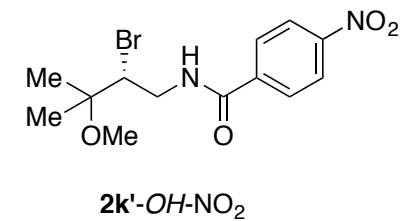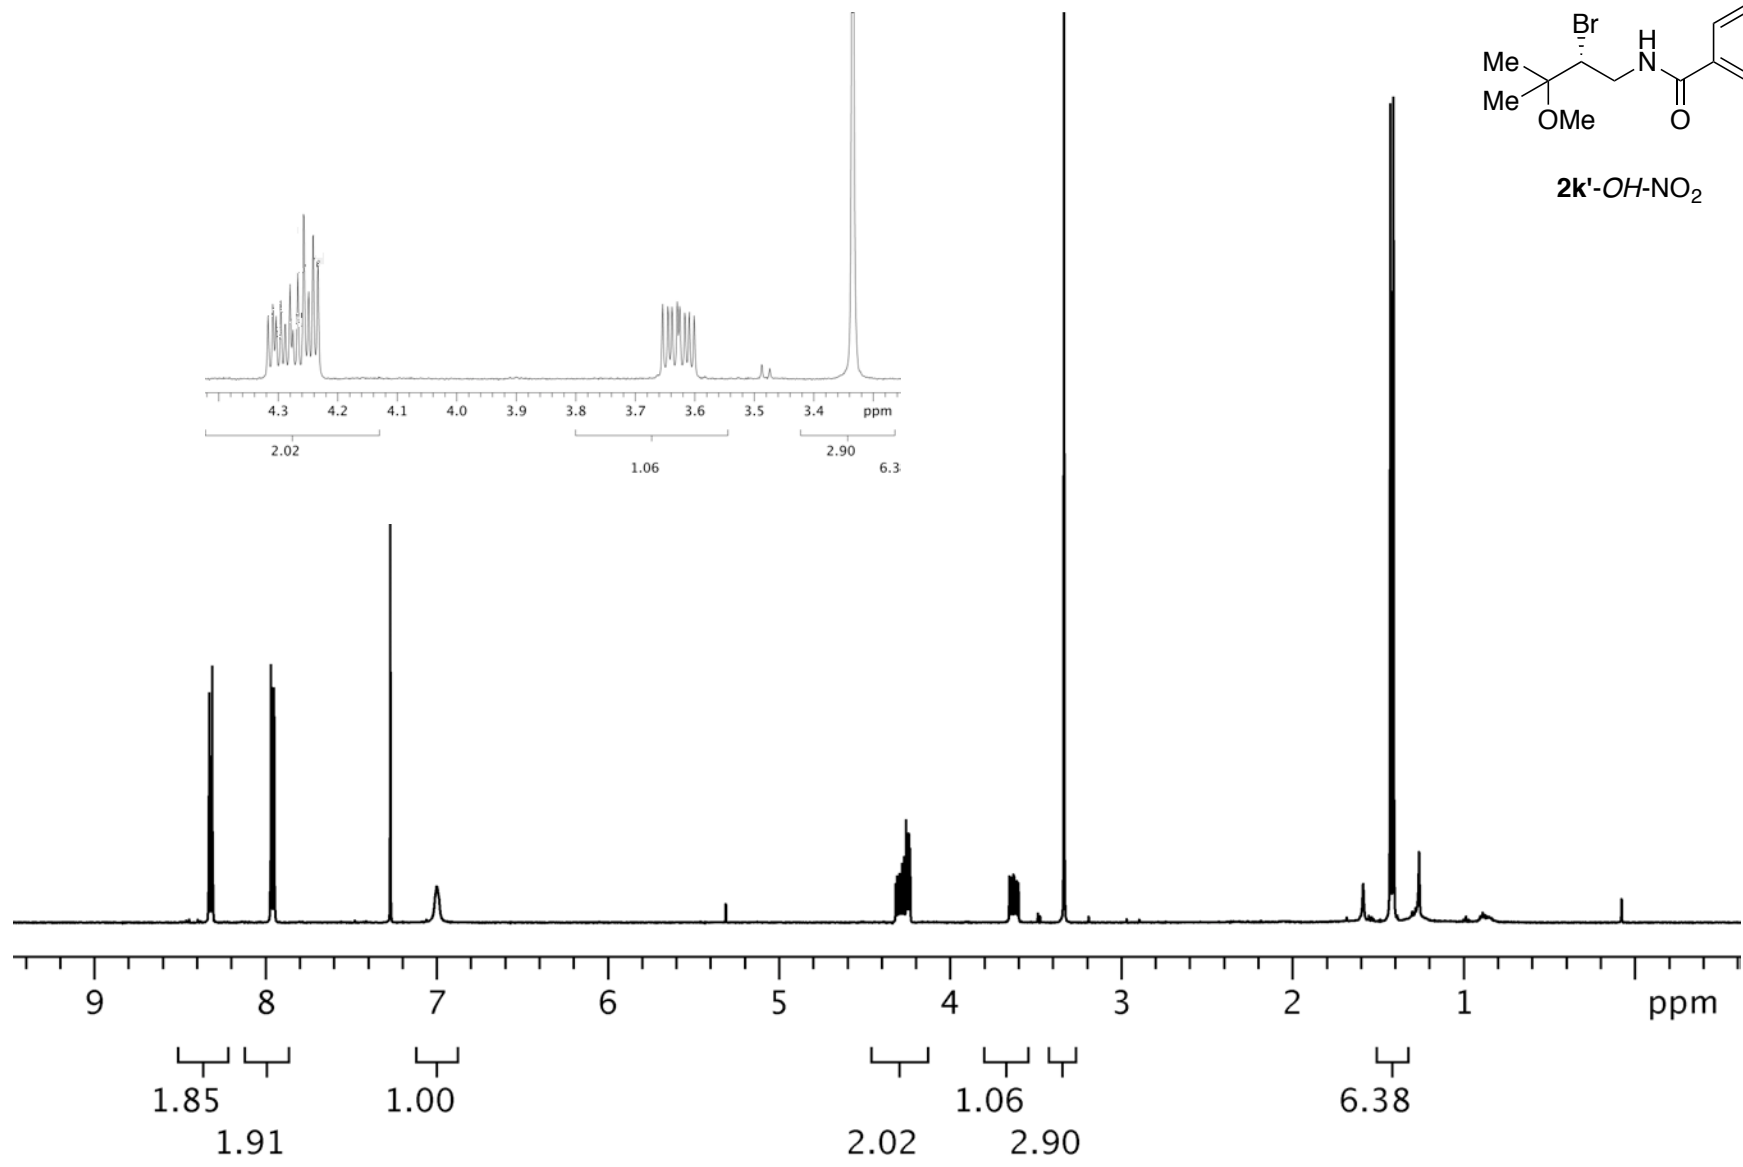

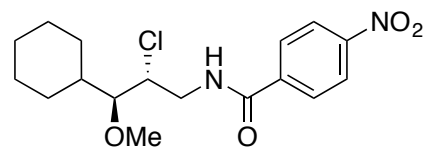

*a-2a-OMe-NO<sub>2</sub>*

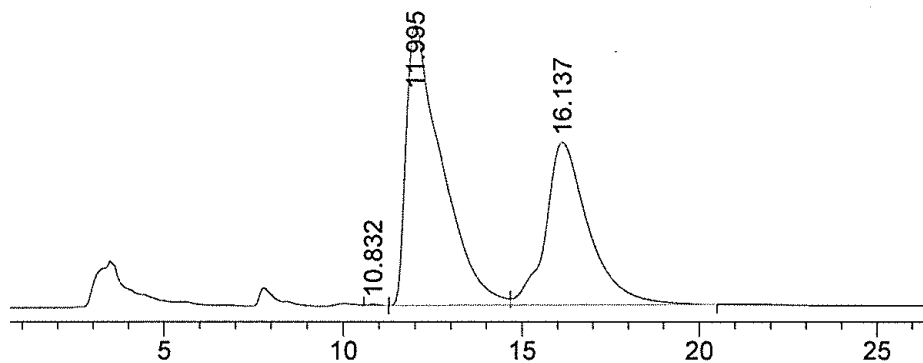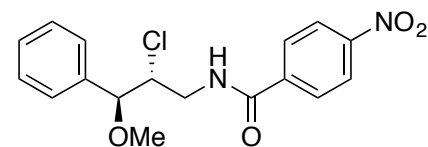

*a-2b-OMe-NO<sub>2</sub>*

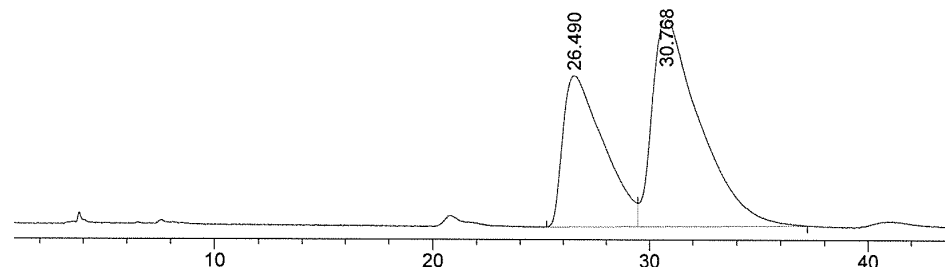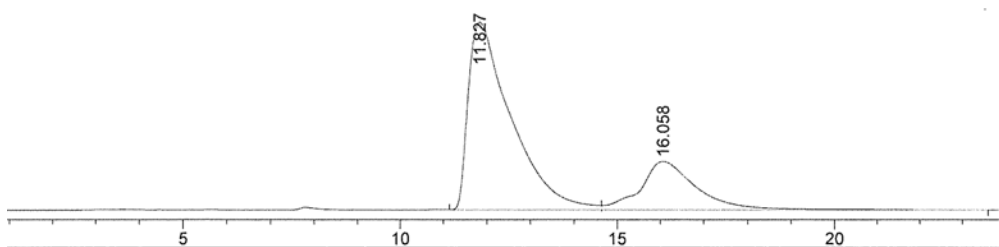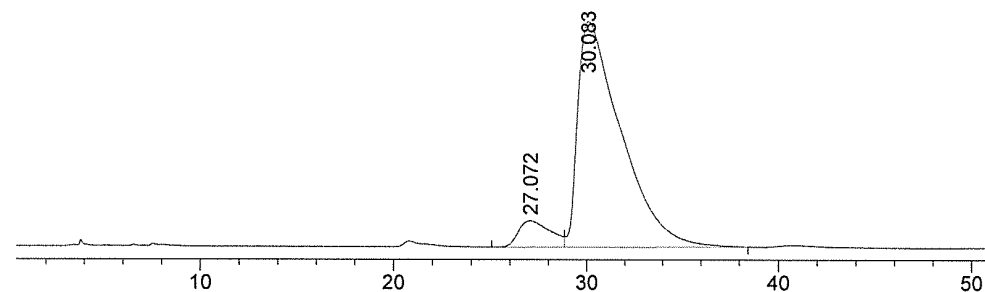

Signal 1: DAD1 A, Sig=254,8 Ref=700,100

| Peak # | RetTime [min] | Type | Width [min] | Area [mAU*s] | Height [mAU] | Area %  |
|--------|---------------|------|-------------|--------------|--------------|---------|
| 1      | 11.827        | VV   | 0.9788      | 1.27801e5    | 1861.94678   | 74.5447 |
| 2      | 16.058        | VB   | 1.2995      | 4.36412e4    | 480.53467    | 25.4553 |

Signal 2: DAD1 B, Sig=265,16 Ref=700,100

| Peak # | RetTime [min] | Type | Width [min] | Area [mAU*s] | Height [mAU] | Area %  |
|--------|---------------|------|-------------|--------------|--------------|---------|
| 1      | 27.072        | BV   | 1.3808      | 3583.96069   | 30.90754     | 7.9210  |
| 2      | 30.083        | VB   | 2.1271      | 4.16622e4    | 262.58087    | 92.0790 |

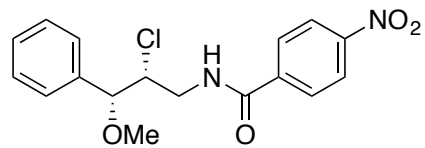

*s*-2b-OMe-NO<sub>2</sub>

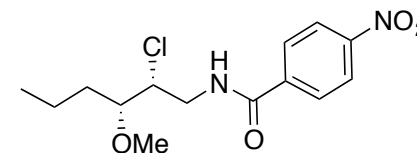

*s*-2c-OMe-NO<sub>2</sub>

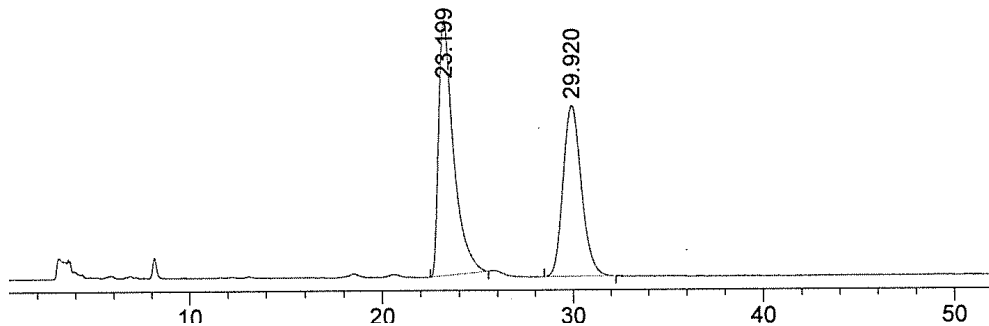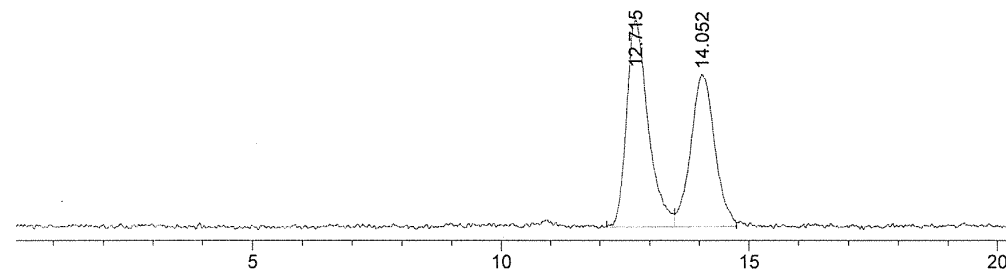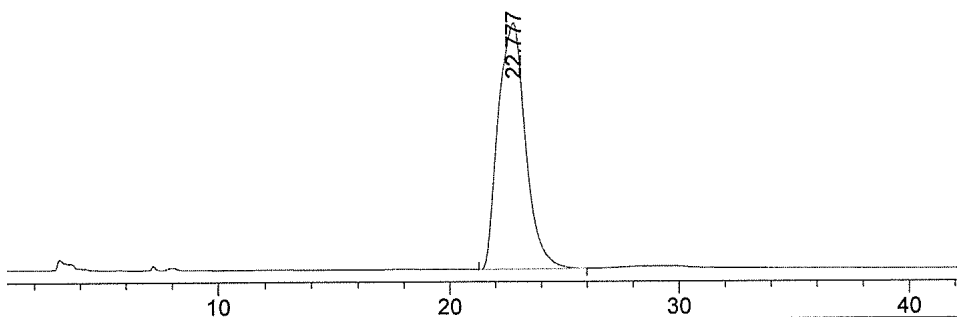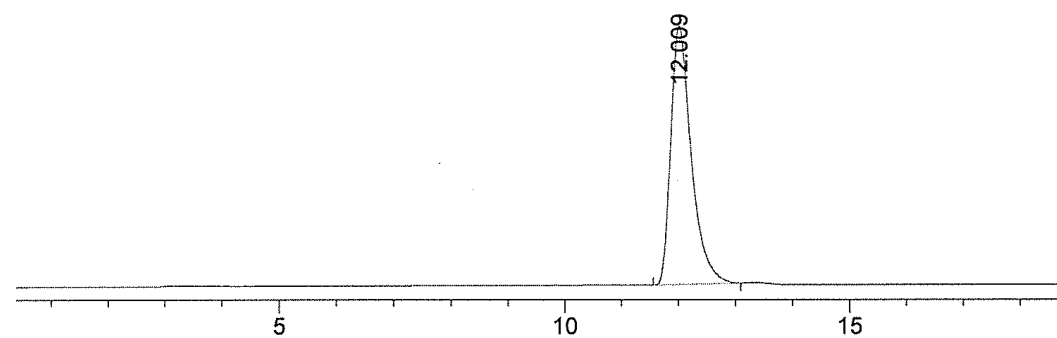

Signal 2: DAD1 B, Sig=220,4 Ref=700,100

| Peak # | RetTime [min] | Type | Width [min] | Area [mAU*s] | Height [mAU] | Area %   |
|--------|---------------|------|-------------|--------------|--------------|----------|
| 1      | 22.777        | BB   | 1.3413      | 1.08349e4    | 130.68146    | 100.0000 |

Signal 2: DAD1 B, Sig=220,4 Ref=700,100

| Peak # | RetTime [min] | Type | Width [min] | Area [mAU*s] | Height [mAU] | Area %   |
|--------|---------------|------|-------------|--------------|--------------|----------|
| 1      | 12.009        | BB   | 0.3774      | 2051.94751   | 81.60533     | 100.0000 |

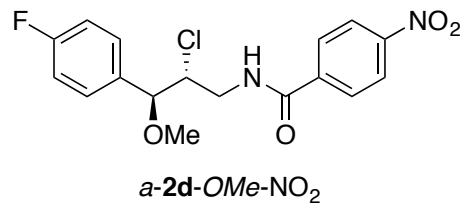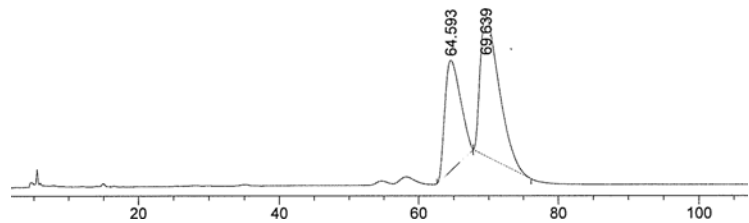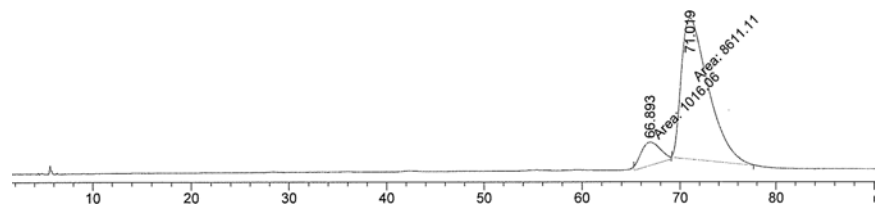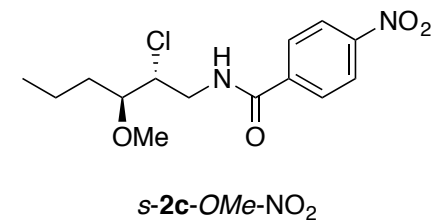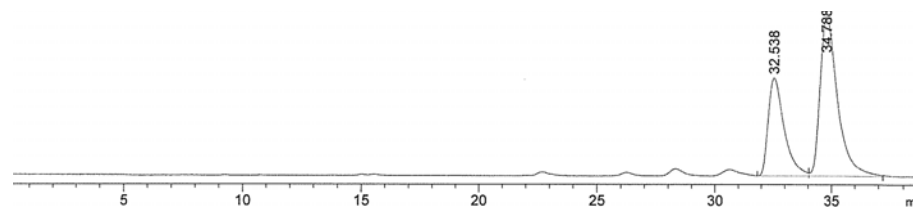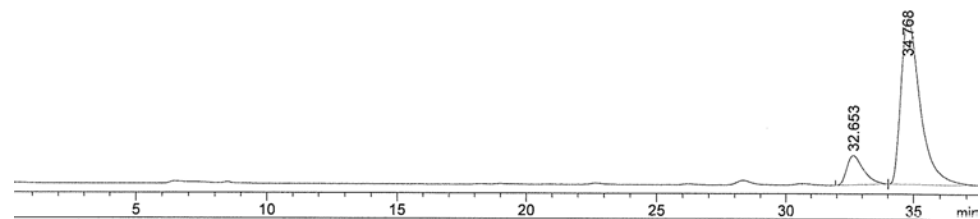

Signal 1: DAD1 A, Sig=280,4 Ref=700,100

| Peak # | RetTime [min] | Type | Width [min] | Area [mAU*s] | Height [mAU] | Area %  |
|--------|---------------|------|-------------|--------------|--------------|---------|
| 1      | 66.893        | MM   | 1.6267      | 1016.05615   | 7.34504      | 10.5541 |
| 2      | 71.019        | MM   | 3.2316      | 8611.11133   | 44.41131     | 89.4459 |

Signal 1: DAD1 A, Sig=254,8 Ref=700,100

| Peak # | RetTime [min] | Type | Width [min] | Area [mAU*s] | Height [mAU] | Area %  |
|--------|---------------|------|-------------|--------------|--------------|---------|
| 1      | 32.653        | BB   | 0.5996      | 3359.80298   | 74.01774     | 13.3955 |
| 2      | 34.768        | BBA  | 0.7351      | 2.17218e4    | 421.60617    | 86.6045 |



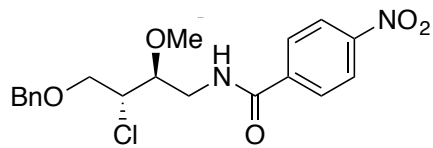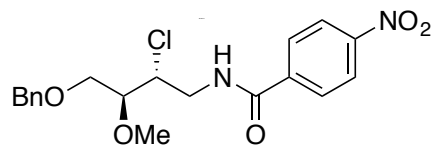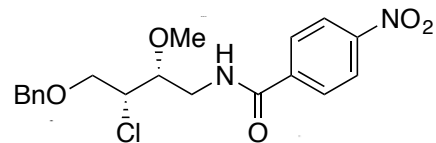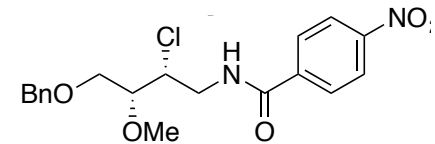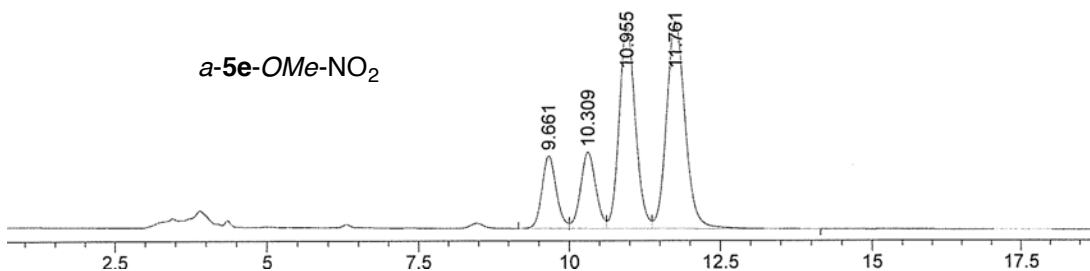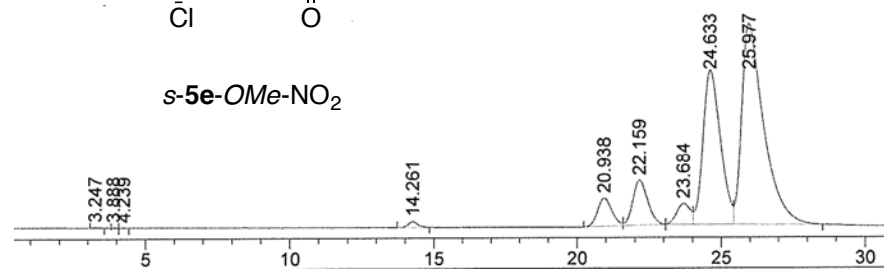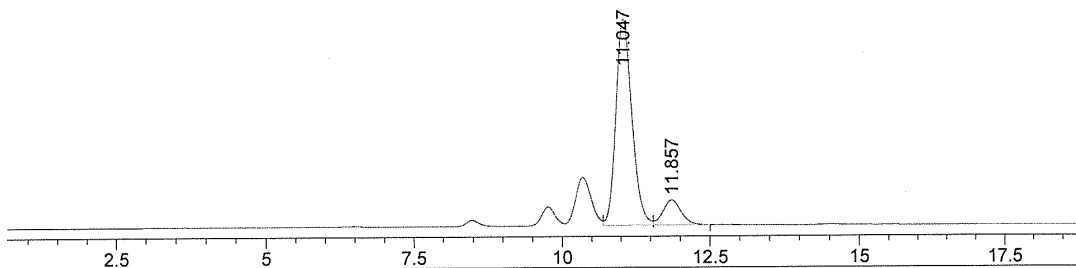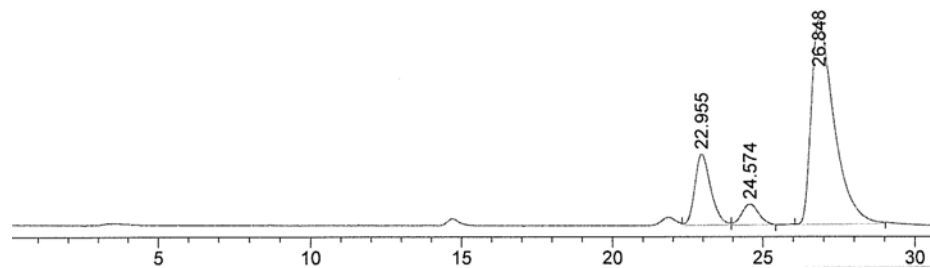

Signal 1: DAD1 A, Sig=254,16 Ref=700,100

| Peak # | RetTime [min] | Type | Width [min] | Area [mAU*s] | Height [mAU] | Area %  |
|--------|---------------|------|-------------|--------------|--------------|---------|
| 1      | 11.047        | VV   | 0.2915      | 1.93092e4    | 1017.04584   | 87.9529 |
| 2      | 11.857        | VB   | 0.3252      | 2644.81445   | 123.80856    | 12.0471 |

S105

Signal 1: DAD1 A, Sig=254,4 Ref=700,100

| Peak # | RetTime [min] | Type | Width [min] | Area [mAU*s] | Height [mAU] | Area %  |
|--------|---------------|------|-------------|--------------|--------------|---------|
| 1      | 22.955        | VV   | 0.5400      | 8302.54883   | 224.20834    | 18.5846 |
| 2      | 24.574        | VV   | 0.5132      | 2593.12012   | 65.31544     | 5.8045  |
| 3      | 26.848        | VV   | 0.6881      | 3.37787e4    | 645.96802    | 75.6109 |

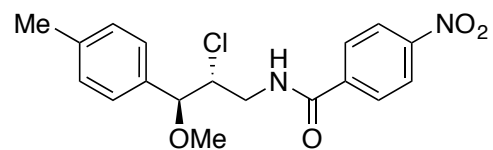

*a*-2f-OMe-NO<sub>2</sub>

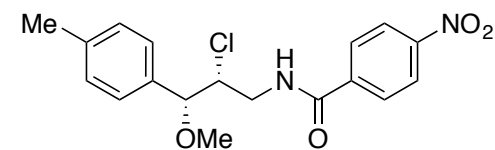

*s*-2f-OMe-NO<sub>2</sub>

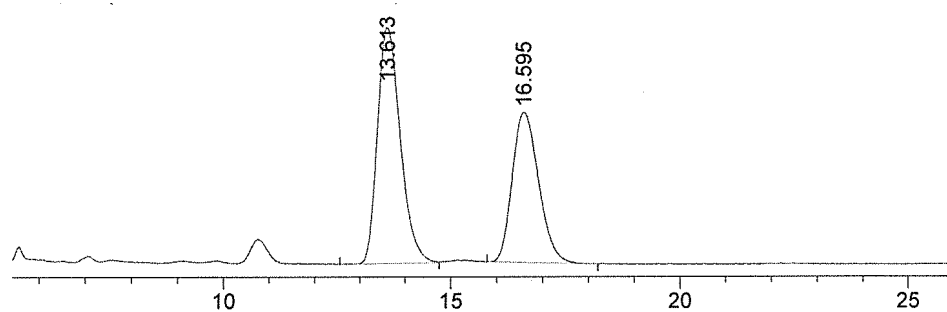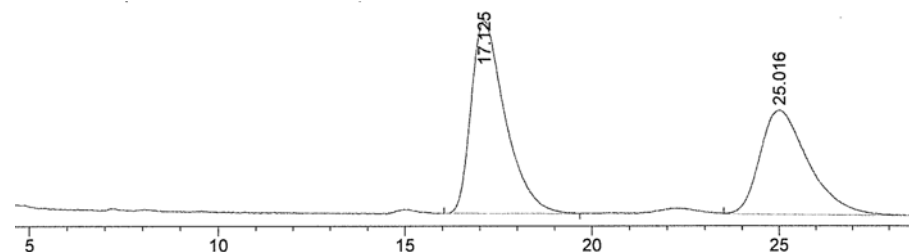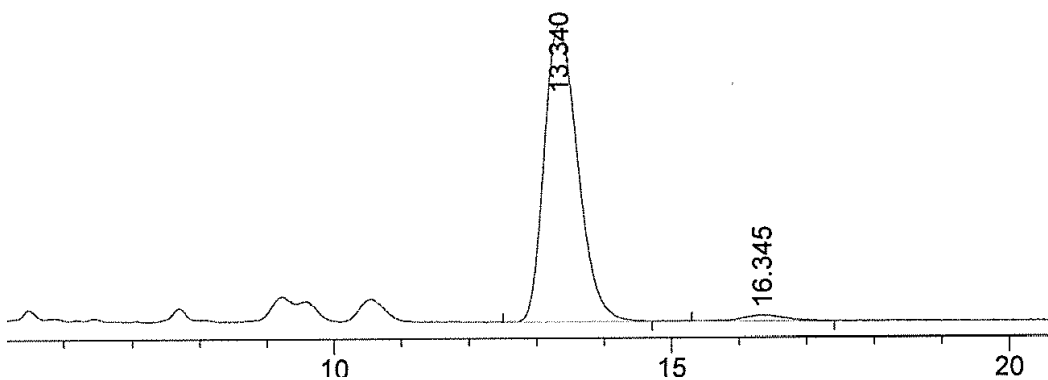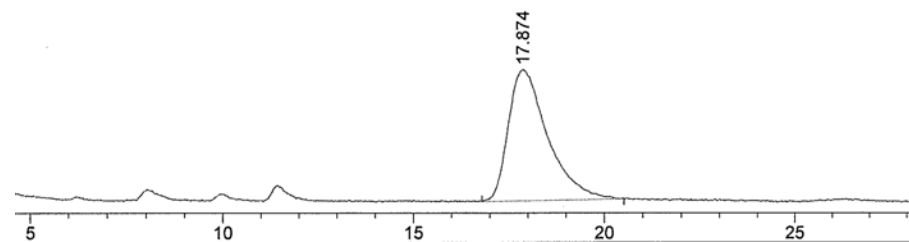

Signal 2: DAD1 B, Sig=265,16 Ref=700,100

| Peak # | RetTime [min] | Type | Width [min] | Area [mAU*s] | Height [mAU] | Area %  |
|--------|---------------|------|-------------|--------------|--------------|---------|
| 1      | 13.340        | BB   | 0.5440      | 7391.94189   | 213.46135    | 97.4614 |
| 2      | 16.345        | BB   | 0.5881      | 192.54341    | 4.18983      | 2.5386  |

Signal 3: DAD1 C, Sig=220,4 Ref=360,100

| Peak # | RetTime [min] | Type | Width [min] | Area [mAU*s] | Height [mAU] | Area %   |
|--------|---------------|------|-------------|--------------|--------------|----------|
| 1      | 17.874        | BB   | 0.8762      | 9850.87695   | 136.77840    | 100.0000 |

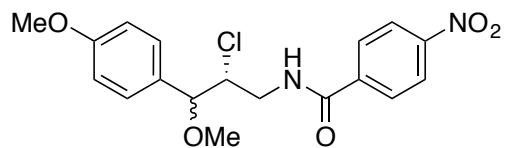

*epi-2g-OMe-NO<sub>2</sub>*

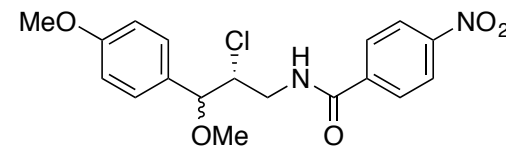

*2g-OMe-NO<sub>2</sub>*

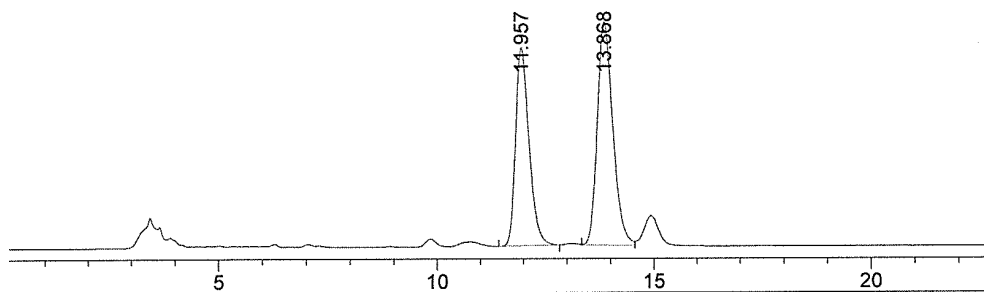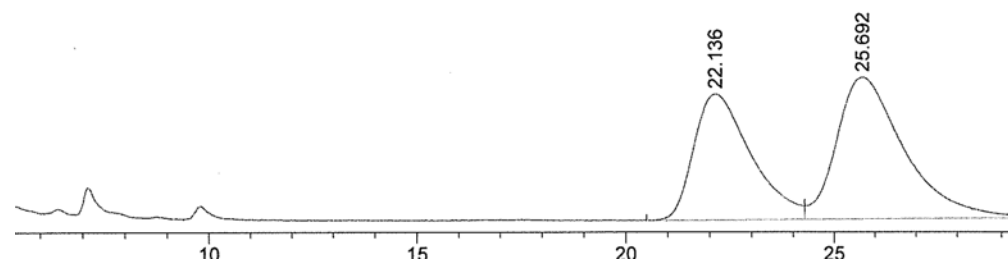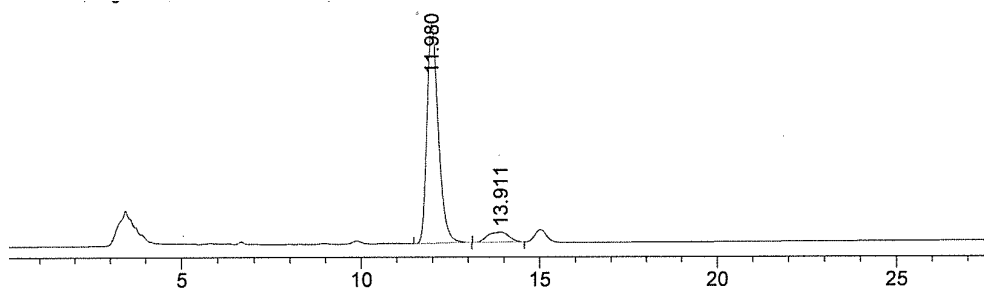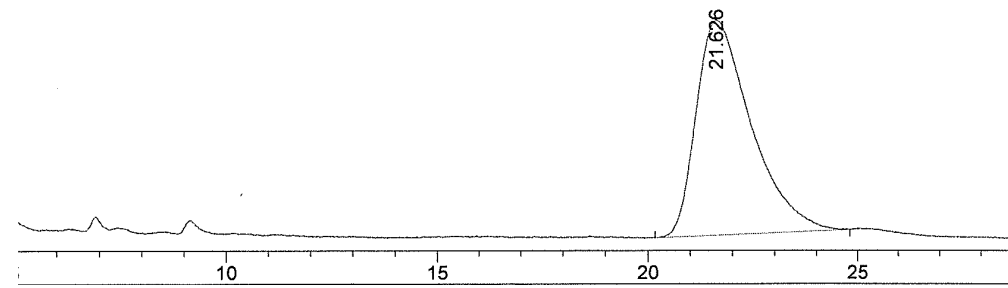

Signal 1: DAD1 A, Sig=254,16 Ref=700,100

| Peak # | RetTime [min] | Type | Width [min] | Area [mAU*s] | Height [mAU] | Area %  |
|--------|---------------|------|-------------|--------------|--------------|---------|
| 1      | 11.980        | BB   | 0.3369      | 6613.10547   | 298.01282    | 92.1757 |
| 2      | 13.911        | BB   | 0.5752      | 561.34766    | 13.55463     | 7.8243  |

Signal 3: DAD1 C, Sig=220,4 Ref=360,100

| Peak #   | RetTime [min] | Type | Width [min] | Area [mAU*s] | Height [mAU] | Area %   |
|----------|---------------|------|-------------|--------------|--------------|----------|
| 1        | 21.670        | BB   | 1.0479      | 7231.27100   | 81.44363     | 100.0000 |
| Totals : |               |      |             | 7231.27100   | 81.44363     |          |

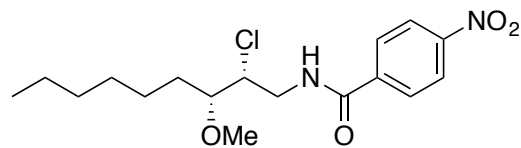

s-2i-OMe-NO<sub>2</sub>

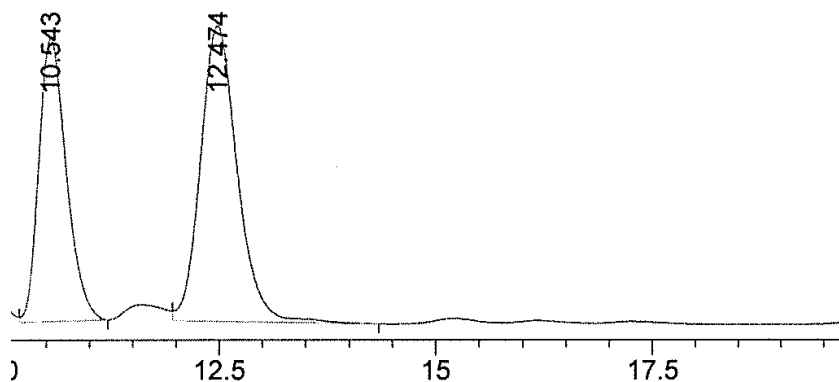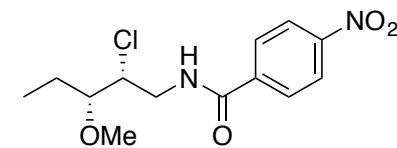

s-2h-OMe-NO<sub>2</sub>

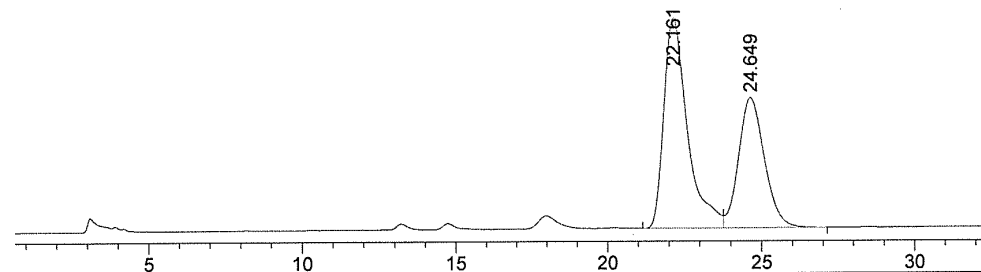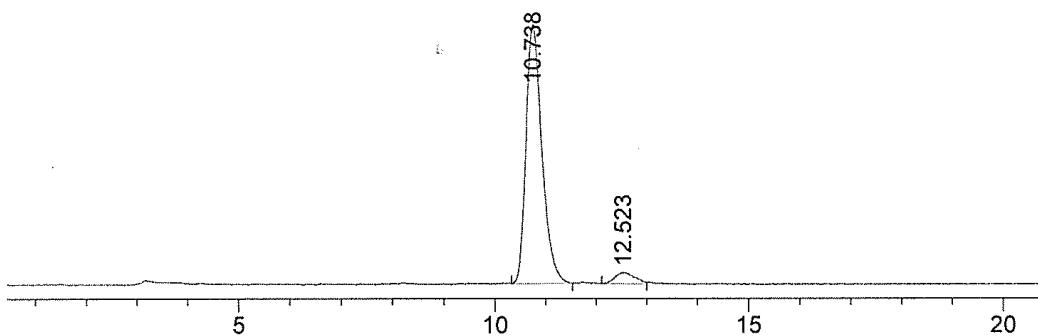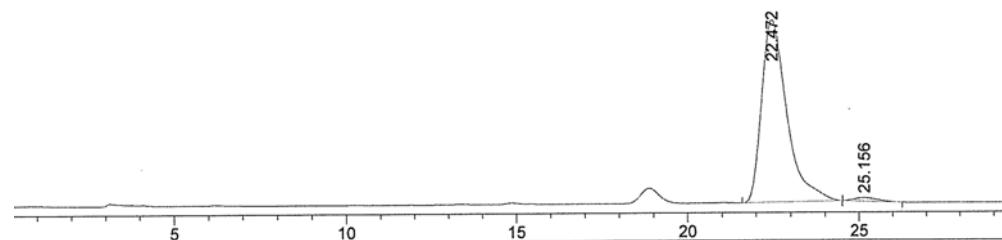

Signal 1: DAD1 A, Sig=254,4 Ref=700,100

| Peak # | RetTime [min] | Type | Width [min] | Area [mAU*s] | Height [mAU] | Area %  |
|--------|---------------|------|-------------|--------------|--------------|---------|
| 1      | 10.738        | VV   | 0.3362      | 7509.45557   | 341.92676    | 94.9794 |
| 2      | 12.523        | BV   | 0.3249      | 396.94955    | 14.52227     | 5.0206  |

Signal 1: DAD1 A, Sig=254,16 Ref=700,100

| Peak # | RetTime [min] | Type | Width [min] | Area [mAU*s] | Height [mAU] | Area %  |
|--------|---------------|------|-------------|--------------|--------------|---------|
| 1      | 22.472        | BB   | 0.7736      | 1.30288e4    | 256.06775    | 98.2845 |
| 2      | 25.156        | BB   | 0.6053      | 227.41432    | 4.76081      | 1.7155  |



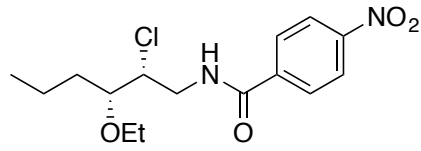

*s*-2c-OEt-NO<sub>2</sub>

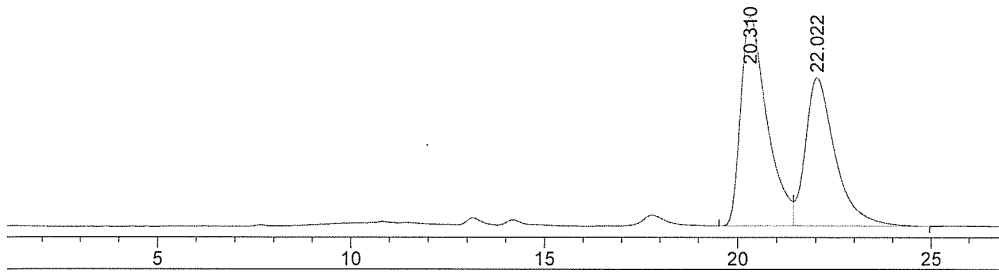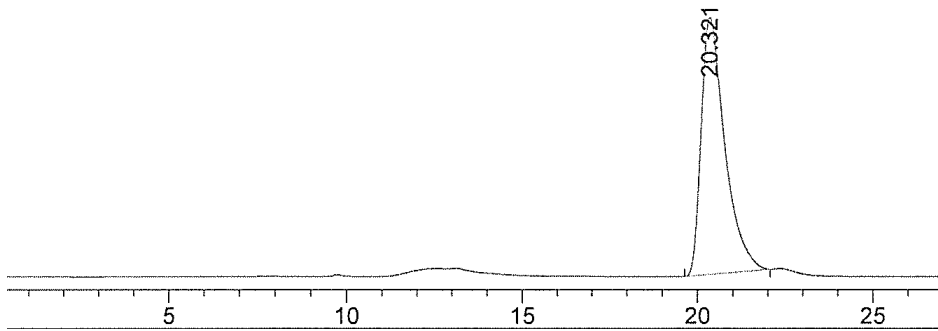

Signal 1: DAD1 A, Sig=254,16 Ref=700,100

| Peak # | RetTime [min] | Type | Width [min] | Area [mAU*s] | Height [mAU] | Area %   |
|--------|---------------|------|-------------|--------------|--------------|----------|
| 1      | 20.321        | BB   | 0.6999      | 1.00796e4    | 215.42938    | 100.0000 |

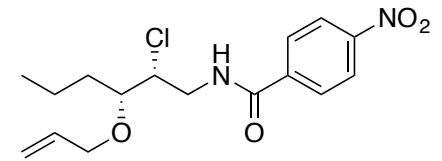

*s*-2c-OAllyl-NO<sub>2</sub>

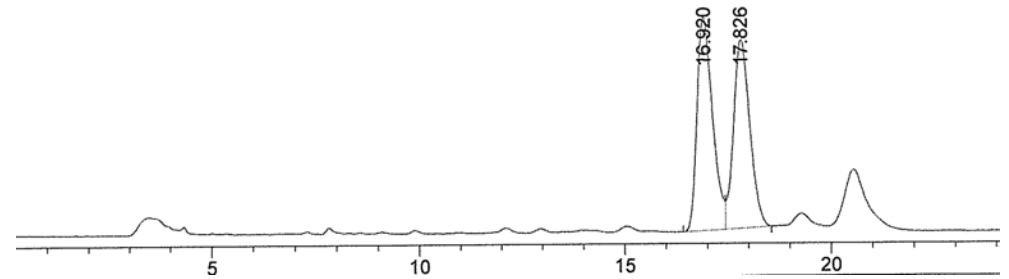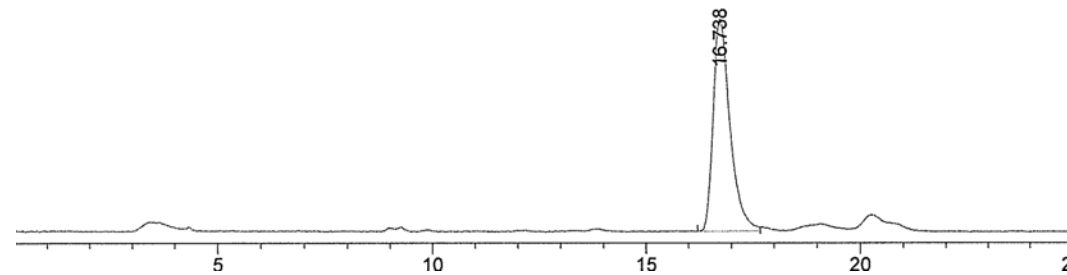

Signal 1: DAD1 A, Sig=254,4 Ref=700,100

| Peak # | RetTime [min] | Type | Width [min] | Area [mAU*s] | Height [mAU] | Area %   |
|--------|---------------|------|-------------|--------------|--------------|----------|
| 1      | 16.738        | BV   | 0.4009      | 8924.97559   | 324.47839    | 100.0000 |

Totals : 8924.97559 324.47839

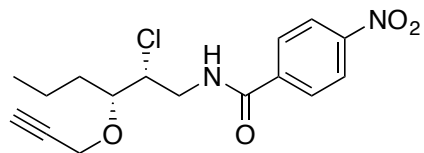

*s*-2c-OPropargyl-NO<sub>2</sub>

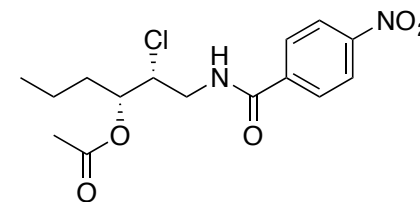

*s*-2c-OAc-NO<sub>2</sub>

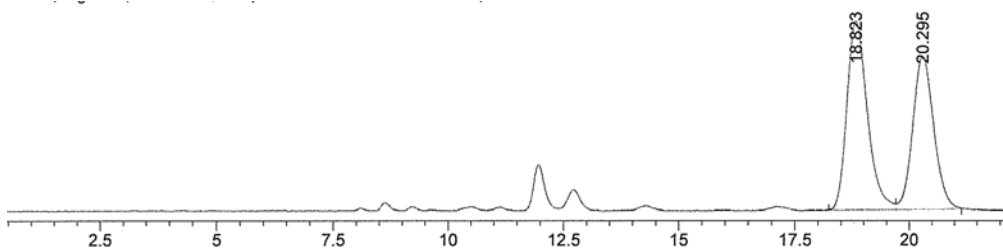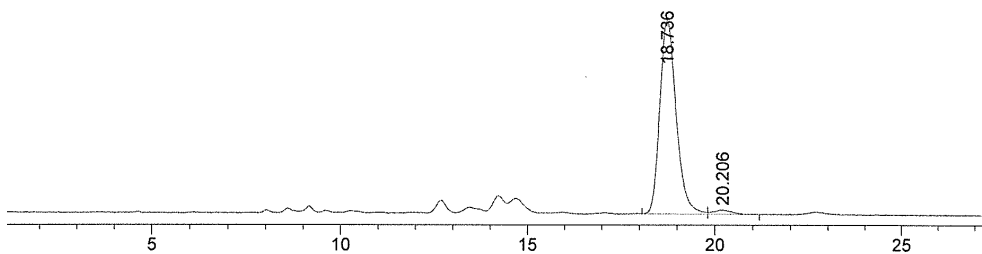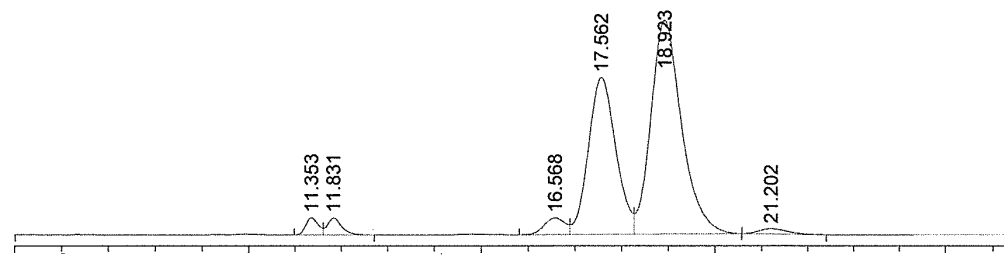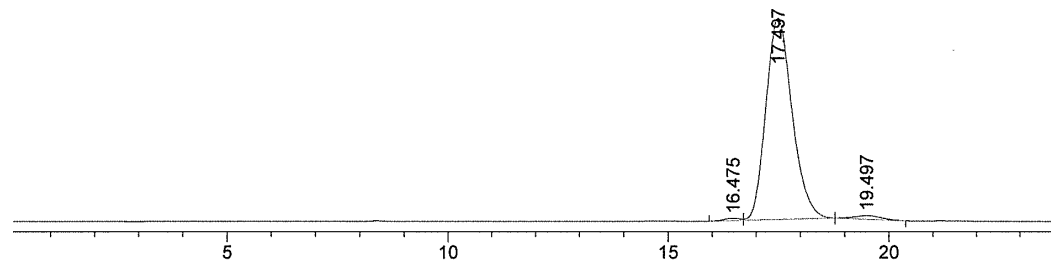

Signal 2: DAD1 B, Sig=265,16 Ref=700,100

| Peak # | RetTime [min] | Type | Width [min] | Area [mAU*s] | Height [mAU] | Area %  |
|--------|---------------|------|-------------|--------------|--------------|---------|
| 1      | 18.736        | BV   | 0.4690      | 5499.04688   | 181.74376    | 97.5875 |
| 2      | 20.206        | VB   | 0.4256      | 135.94344    | 3.90987      | 2.4125  |

Signal 1: DAD1 A, Sig=254,8 Ref=700,100

| Peak # | RetTime [min] | Type | Width [min] | Area [mAU*s] | Height [mAU] | Area %  |
|--------|---------------|------|-------------|--------------|--------------|---------|
| 1      | 16.475        | BV   | 0.3564      | 77.77691     | 2.98071      | 0.7018  |
| 2      | 17.497        | VB   | 0.6431      | 1.08075e4    | 260.98962    | 97.5218 |
| 3      | 19.497        | BB   | 0.5882      | 196.86147    | 4.66645      | 1.7764  |

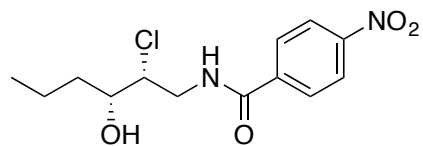

*s*-2*C*-OH-NO<sub>2</sub>

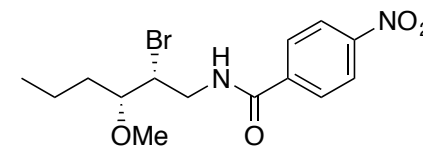

*c*-2*c'*-OMe-NO<sub>2</sub>

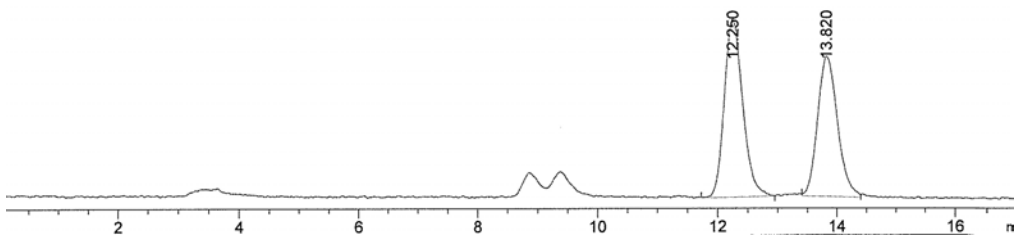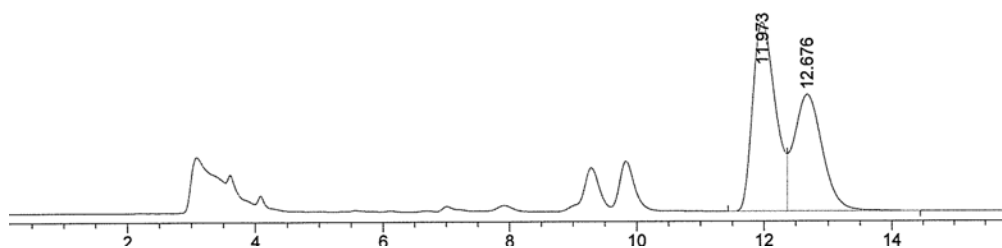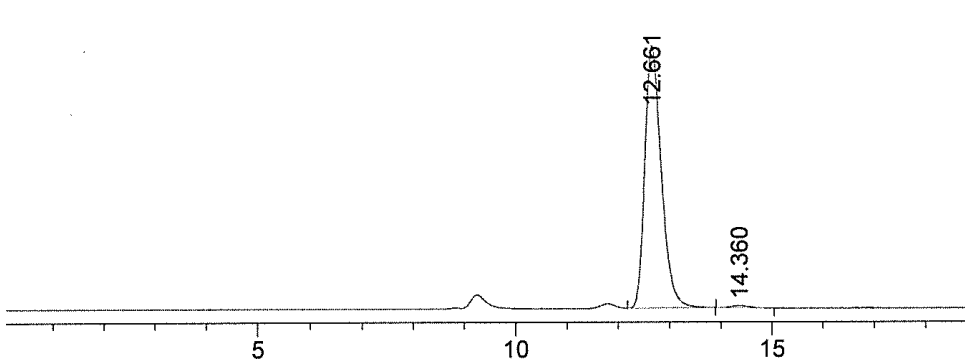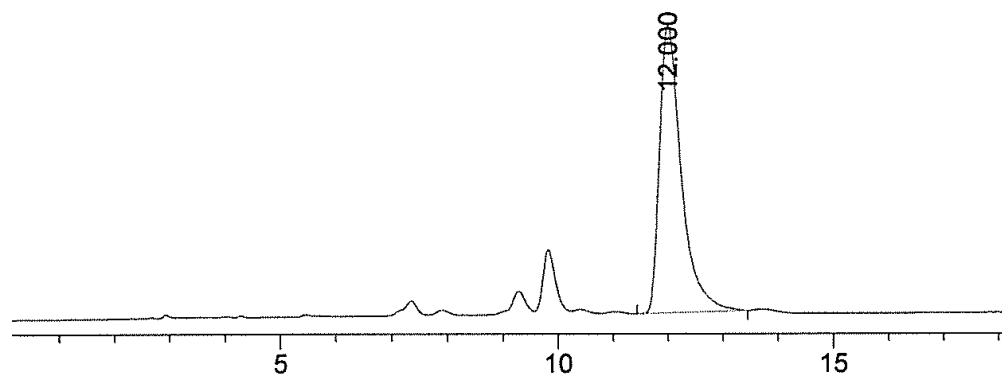

Signal 2: DAD1 B, Sig=265,16 Ref=700,100

| Peak # | RetTime [min] | Type | Width [min] | Area [mAU*s] | Height [mAU] | Area %  |
|--------|---------------|------|-------------|--------------|--------------|---------|
| 1      | 12.661        | BB   | 0.3456      | 1.23137e4    | 549.18805    | 99.0693 |
| 2      | 14.360        | BB   | 0.3584      | 115.68494    | 4.99141      | 0.9307  |

Signal 1: DAD1 A, Sig=254,16 Ref=700,100

| Peak # | RetTime [min] | Type | Width [min] | Area [mAU*s] | Height [mAU] | Area %   |
|--------|---------------|------|-------------|--------------|--------------|----------|
| 1      | 12.000        | BB   | 0.4219      | 3592.17529   | 129.38919    | 100.0000 |



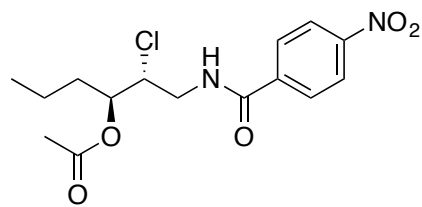

*a-2c-OAc-NO<sub>2</sub>*

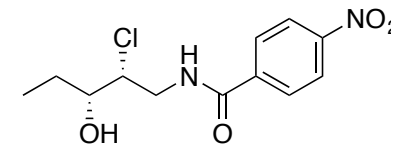

*s-2h-OH-NO<sub>2</sub>*

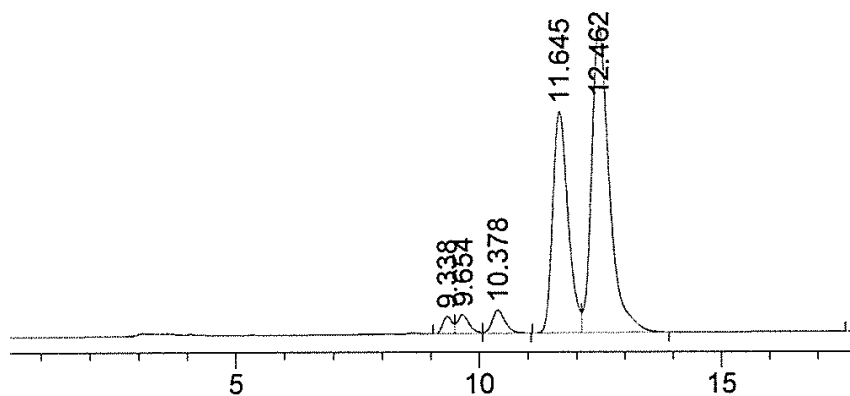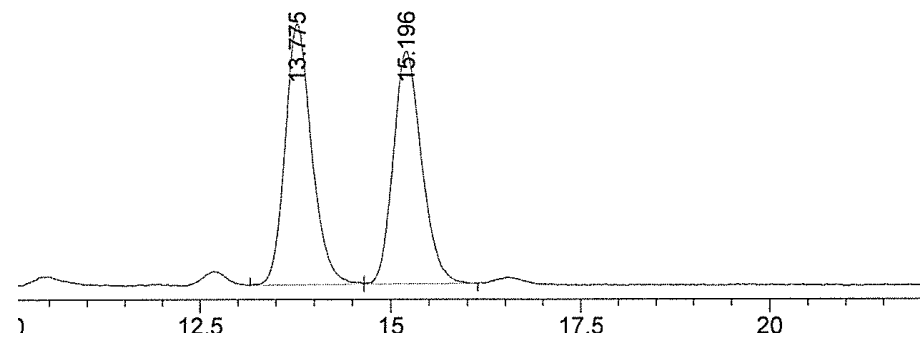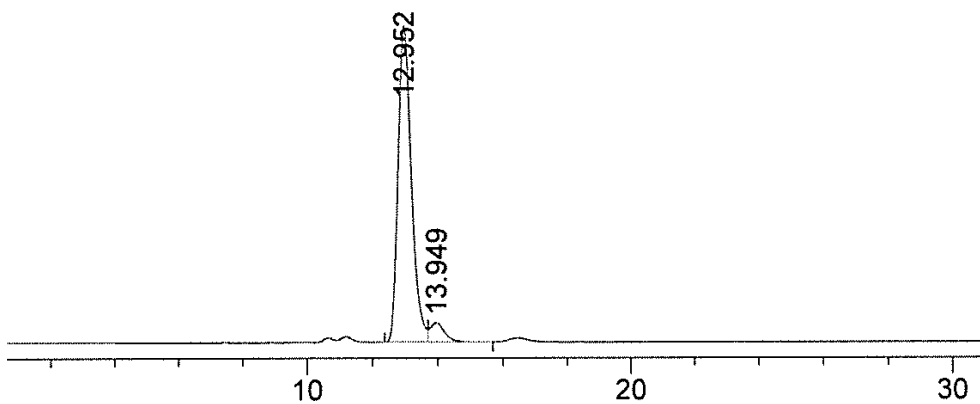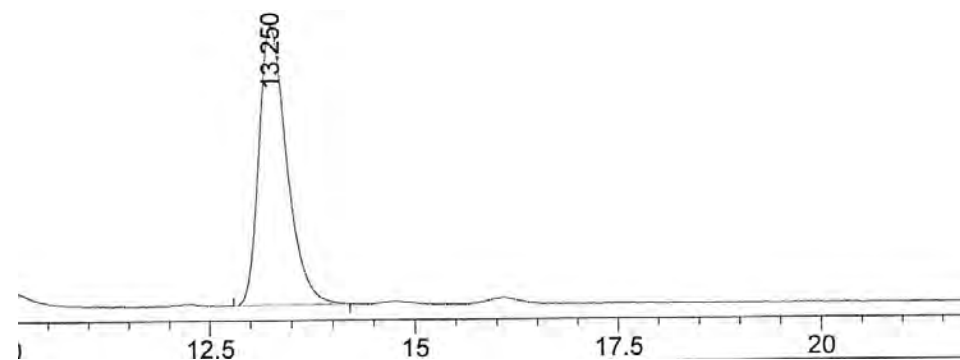

Signal 1: DAD1 A, Sig=254,8 Ref=700,100

| Peak # | RetTime [min] | Type | Width [min] | Area [mAU*s] | Height [mAU] | Area %  |
|--------|---------------|------|-------------|--------------|--------------|---------|
| 1      | 12.952        | BV   | 0.4381      | 2.36494e4    | 825.77203    | 93.7902 |
| 2      | 13.949        | VB   | 0.4508      | 1565.82568   | 51.19651     | 6.2098  |

Signal 1: DAD1 A, Sig=254,4 Ref=700,100

| Peak # | RetTime [min] | Type | Width [min] | Area [mAU*s] | Height [mAU] | Area %   |
|--------|---------------|------|-------------|--------------|--------------|----------|
| 1      | 13.250        | BV   | 0.3563      | 9204.58887   | 391.53445    | 100.0000 |

Totals : 9204.58887 391.53445

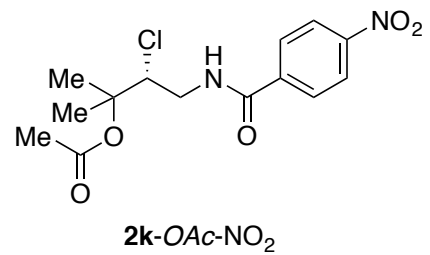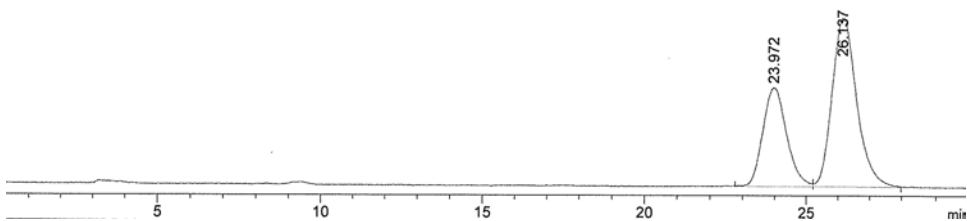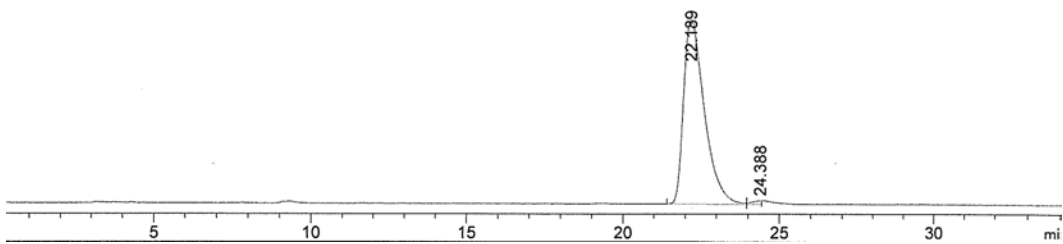

Signal 2: DAD1 B, Sig=265,16 Ref=700,100

| Peak # | RetTime [min] | Type | Width [min] | Area [mAU*s] | Height [mAU] | Area %  |
|--------|---------------|------|-------------|--------------|--------------|---------|
| 1      | 22.186        | BV   | 0.6601      | 2.63117e4    | 572.59424    | 98.0673 |
| 2      | 24.424        | VV   | 0.5649      | 518.55438    | 10.98230     | 1.9327  |

Totals :                    2.68302e4    583.57654

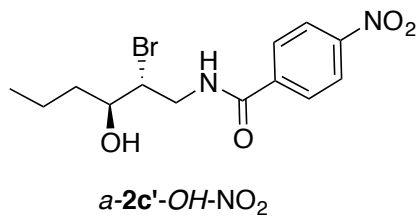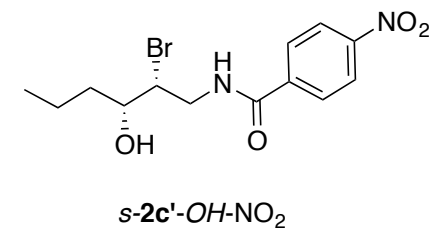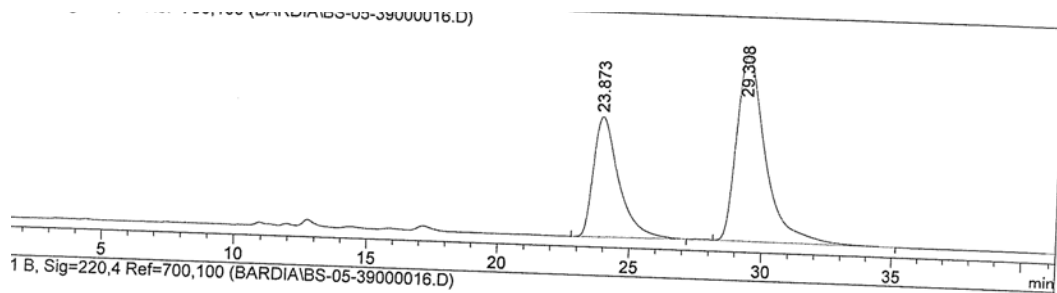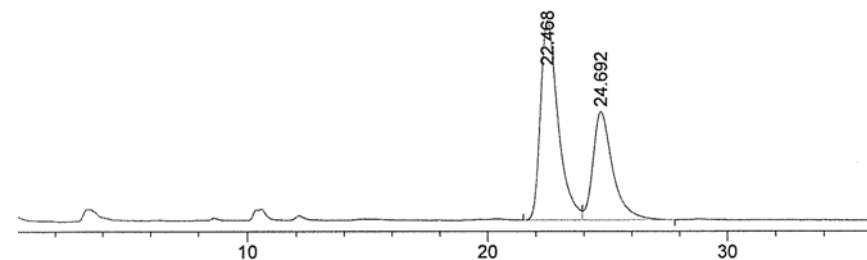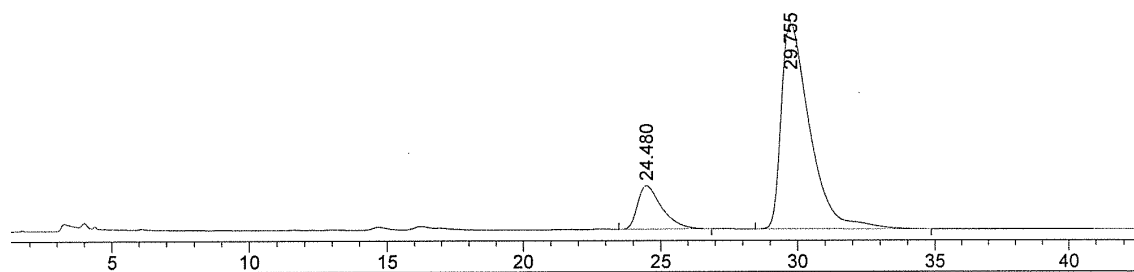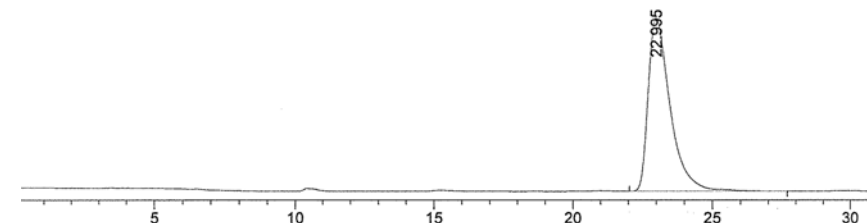

Signal 1: DAD1 A, Sig=254,16 Ref=700,100

| Peak # | RetTime [min] | Type | Width [min] | Area [mAU*s] | Height [mAU] | Area %  |
|--------|---------------|------|-------------|--------------|--------------|---------|
| 1      | 24.480        | BB   | 0.9026      | 1773.56372   | 28.95623     | 15.1845 |
| 2      | 29.755        | BB   | 1.0716      | 9906.49902   | 137.32425    | 84.8155 |

Totals : 1.16801e4 166.28048

Signal 1: DAD1 A, Sig=254,8 Ref=700,100

| Peak # | RetTime [min] | Type | Width [min] | Area [mAU*s] | Height [mAU] | Area %   |
|--------|---------------|------|-------------|--------------|--------------|----------|
| 1      | 22.995        | BB   | 0.8157      | 2.71079e4    | 497.53333    | 100.0000 |

Totals : 2.71079e4 497.53333

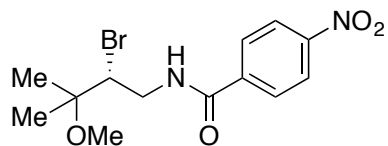

2k'-OMe-NO<sub>2</sub>

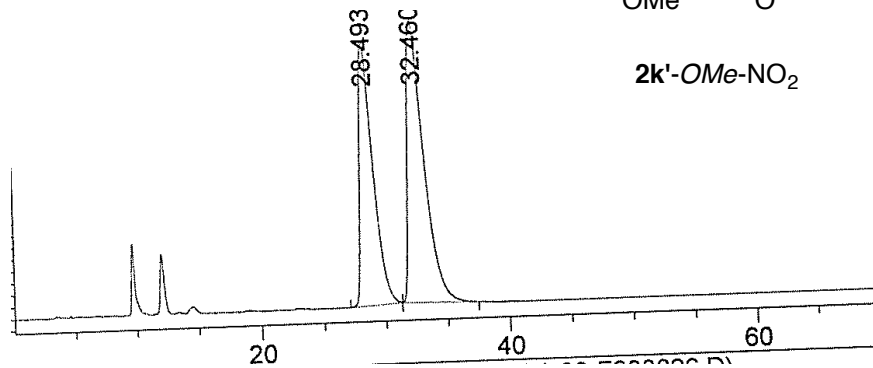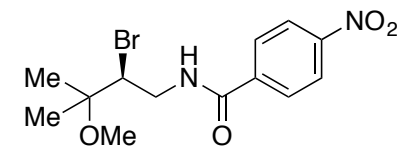

epi-2k'-OMe-NO<sub>2</sub>

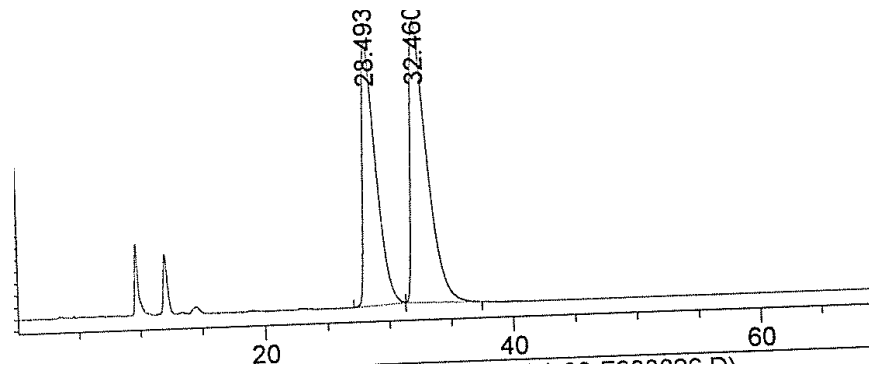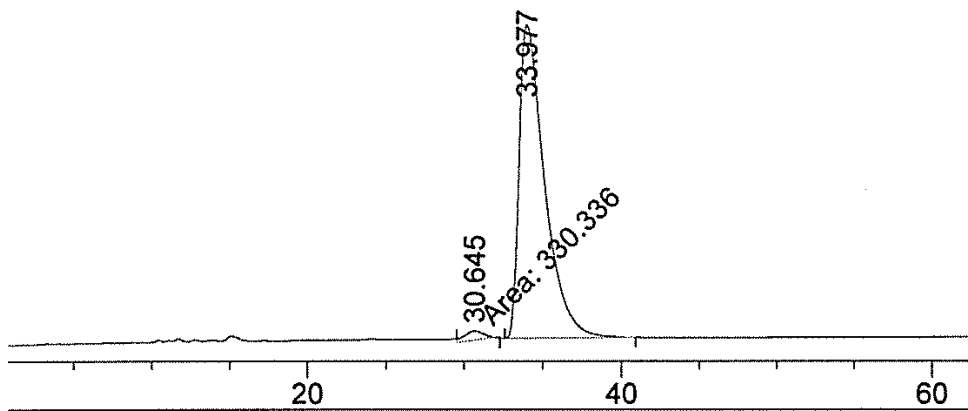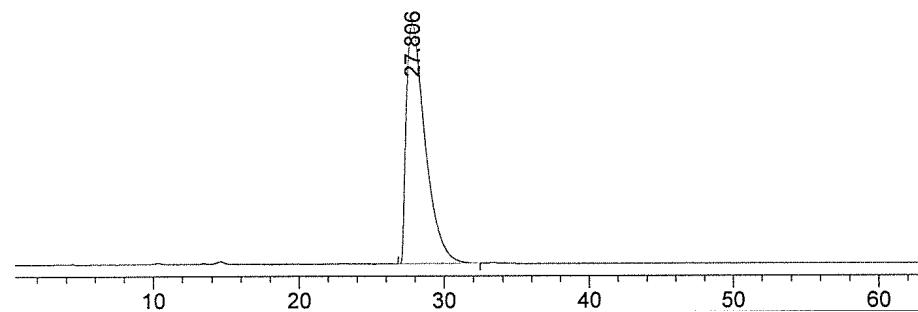

| Peak # | RetTime [min] | Type | Width [min] | Area [mAU*s] | Height [mAU] | Area %  |
|--------|---------------|------|-------------|--------------|--------------|---------|
| 1      | 30.645        | MM   | 1.0235      | 330.33600    | 3.89891      | 2.1124  |
| 2      | 33.977        | BB   | 1.6344      | 1.53073e4    | 135.45303    | 97.8876 |

Signal 1: DAD1 A, Sig=254,16 Ref=700,100

| Peak # | RetTime [min] | Type | Width [min] | Area [mAU*s] | Height [mAU] | Area %   |
|--------|---------------|------|-------------|--------------|--------------|----------|
| 1      | 27.806        | BB   | 1.3771      | 3.65608e4    | 404.26642    | 100.0000 |

Totals : 3.65608e4 404.26642

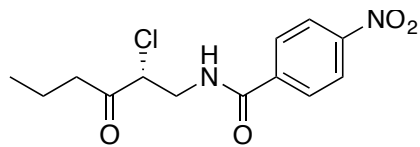

(2R)-6c-NO<sub>2</sub>  
from Z-1c-NO<sub>2</sub>

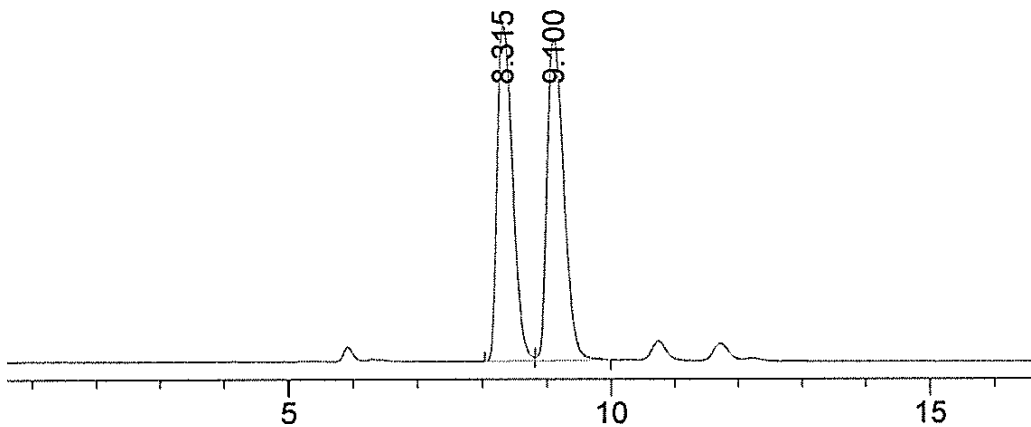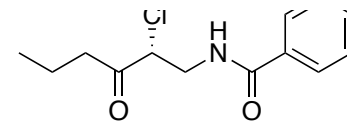

(2R)-6c-NO<sub>2</sub>  
from E-1c-NO<sub>2</sub>

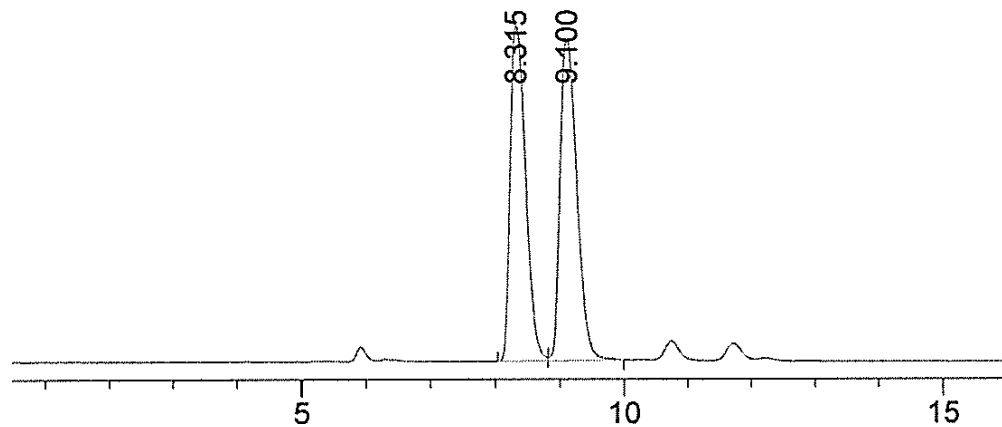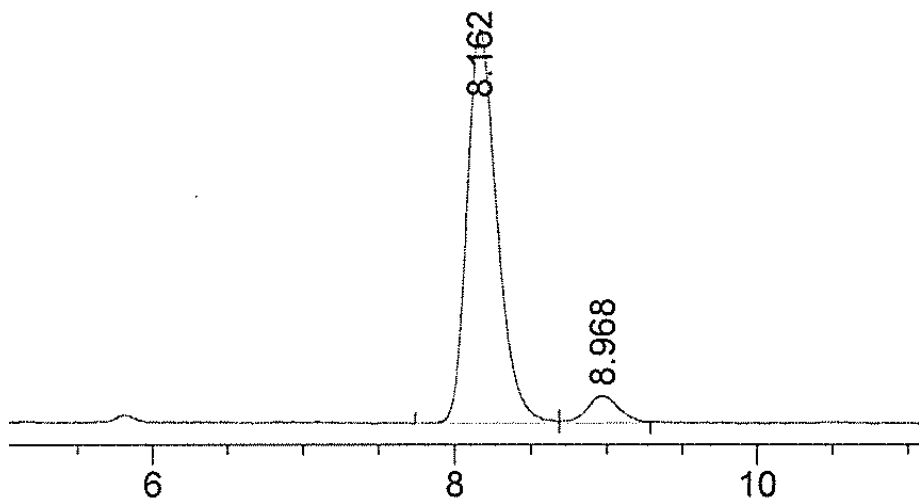

Signal 1: DAD1 A, Sig=250,4 Ref=700,100

| Peak # | RetTime [min] | Type | Width [min] | Area [mAU*s] | Height [mAU] | Area %  |
|--------|---------------|------|-------------|--------------|--------------|---------|
| 1      | 8.162         | BV   | 0.2083      | 6037.53516   | 439.51782    | 92.8504 |
| 2      | 8.968         | VV   | 0.2282      | 464.89636    | 30.42916     | 7.1496  |

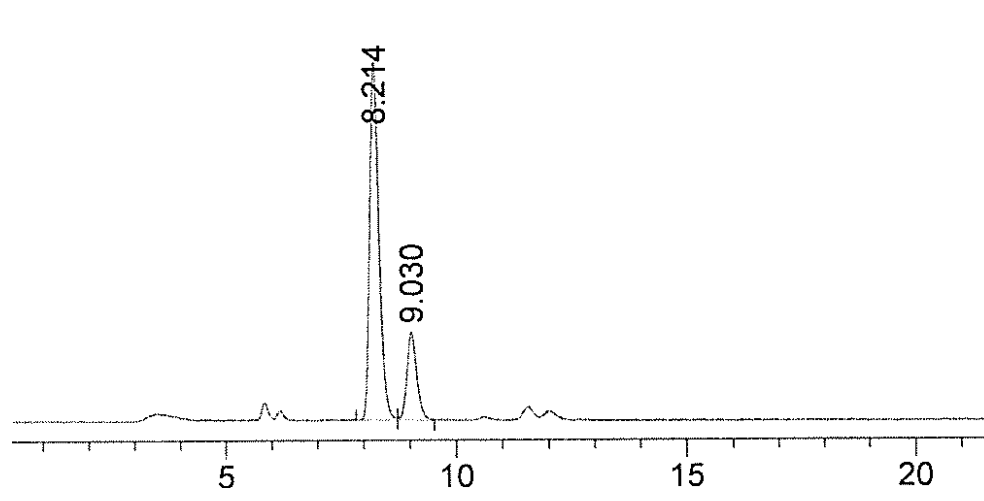

Signal 1: DAD1 A, Sig=250,4 Ref=700,100

| Peak # | RetTime [min] | Type | Width [min] | Area [mAU*s] | Height [mAU] | Area %  |
|--------|---------------|------|-------------|--------------|--------------|---------|
| 1      | 8.214         | BV   | 0.2150      | 7363.65869   | 527.14642    | 79.2426 |
| 2      | 9.030         | VV   | 0.2302      | 1928.88879   | 129.15938    | 20.7574 |
